# Supplementary material for: Multiomic Fermentation Using Chemically Defined Synthetic Hydrolyzates Revealed Multiple Effects of Lignocellulose-Derived Inhibitors on Cell Physiology and Xylose Utilization in Zymomonas mobilis
Source: Front Microbiol. 2019 Nov 7;10:2596. doi: 10.3389/fmicb.2019.02596 (PMC6853872; doi:10.3389/fmicb.2019.02596)
Supplement: TABLE S2 — Compiled proteomics differential expression results. [file Table_2.XLSX]

## Sheet: Differential Expression Results
Product	Gene	Protein Group	Log 2 Fold T1	T1 FDR	Log 2 Fold T2	T2 FDR	Log 2 Fold T3	T3 FDR	Log 2 Fold T4	T4 FDR
transaldolase B	talB	b0008	0.222786	0.210193	0.211268	0.008	0.186677	0.148697	0.202958	0.323387
transketolase A	tktA	b2935	0.212999	0.249833	0.209323	0.0870722	0.224803	0.229585	0.112228	0.499474
D-xylulose kinase	xylB	b3564	0.155893	0.357899	0.099781	0.182316	0.0748812	0.684369	0.125734	0.368345
D-xylose isomerase	xylA	b3565	0.280122	0.245307	0.272527	0.066374	0.207536	0.148571	0.141724	0.420738
chloramphenicol acetyltransferase	cat	cat	0.184651	0.675911	0.342789	0.116769	0.100234	0.769734	0.233655	0.396017
adenylyl-sulfate kinase	cysC	ZMO0003	0.125256	0.68259	0.106602	0.587545	0.0360254	0.842839	0.031552	0.94208
sulfate adenylyltransferase large subunit	cysN	ZMO0004	0.217295	0.395373	0.215806	0.358944	0.185371	0.331835	0.279143	0.335792
sulfate adenylyltransferase small subunit	cysD	ZMO0005	0.100107	0.778401	0.0619094	0.594315	0.0604547	0.63407	0.241878	0.137748
siroheme synthase CysG	cysG1	ZMO0006	0.109955	0.68272	-0.0411574	0.669366	-0.0410652	0.884012	0.0304235	0.915792
phosphoadenosine phosphosulfate reductase	cysH	ZMO0007	0.0154324	0.988341	-0.0160364	0.923462	-0.113768	0.544347	0.0997117	0.420193
sulfite reductase (NADPH) hemoprotein beta-component	cysI	ZMO0008	-0.216324	0.301902	-0.170183	0.027697	-0.079621	0.665903	-0.29173	0.256202
sulfite reductase (NADPH) flavoprotein alpha chain	cysJ	ZMO0009	0.0423114	0.77927	-0.0123399	0.954412	0.0136038	0.920297	0.0554256	0.363961
conserved hypothetical protein	ZMO0011	ZMO0011	-0.143772	0.624576	0.199104	0.11835	0.240926	0.467619	0.243823	0.382983
coproporphyrinogen III oxidase	hemN1	ZMO0012	0.193208	0.666321	0.278622	0.238192	0.079408	0.450123	0.17098	0.583325
rdgB/HAM1 family non-canonical purine NTP pyrophosphatase	ZMO0013	ZMO0013	0.420321	0.703123	0.127275	0.542103	0.0405165	0.900124	0.216096	0.151759
ribonuclease PH	rph	ZMO0014	-0.0531171	0.927033	-0.167761	0.480678	-0.315156	0.222079	0.142375	0.394867
heat-inducible transcription repressor HrcA	hrcA	ZMO0015	-0.174591	0.855787	0.330996	0.0387273	0.301027	0.318005	-0.305304	0.427584
GrpE protein	grpE	ZMO0016	0.0557823	0.833836	0.267703	0.0225946	0.216304	0.236042	0.0756836	0.720787
RsmB-like methyltransferase	ZMO0017	ZMO0017	-0.0951341	0.692019	0.0240733	0.8925	-0.0407956	0.871882	0.28978	0.154901
ribulose-phosphate 3-epimerase	rpe	ZMO0018	-0.565565	0.77957	0	1	0	1	0	1
heparinase II/III family protein	ZMO0019	ZMO0019	-0.0164553	0.981855	0.0109914	0.93948	0.0557404	0.603827	0.0155379	0.884304
LUD domain-containing protein	ZMO0020	ZMO0020	0.0349229	0.960895	0.162569	0.27087	0.223902	0.296842	0.123222	0.640561
iron-sulfur cluster-binding protein YkgF	ykgF	ZMO0021	0.195848	0.19233	0.113149	0.574298	0.188047	0.549349	0.0504913	0.849492
Fe-S oxidoreductase	ZMO0022	ZMO0022	0.237869	0.635723	0.120596	0.779637	0.20672	0.446712	0.14275	0.766909
Sel1 domain protein repeat-containing protein	ZMO0026	ZMO0026	0.0888913	0.909302	-0.0104389	0.989224	-0.295564	0.595189	0.457352	0.611095
bifunctional phosphoribosyl aminoimidazole carboxamide formyltransferase/IMP cyclohydrolase	purH	ZMO0027	0.41017	0.189228	0.25173	0.0259683	0.150942	0.202936	0.183634	0.477629
restriction endonuclease	ZMO0028	ZMO0028	0.0403849	0.666896	-0.0614293	0.868416	-0.05992	0.668106	0.132389	0.146746
Sel1 domain protein repeat-containing protein	ZMO0029	ZMO0029	-0.194424	0.888674	-0.653269	0.354466	-0.493555	0.809135	-0.582165	0.227418
glyoxalase/bleomycin resistance protein/dioxygenase	gloA1	ZMO0030	0.0631695	0.84261	0.162846	0.21882	0.0936699	0.827908	0.183901	0.580842
TonB-dependent receptor	ZMO0031	ZMO0031	-0.394438	0.443639	-0.489508	0.110702	-0.33227	0.217205	-0.350303	0.175543
putative zinc- or iron-chelating domain-containing protein	ZMO0033	ZMO0033	-0.504966	0.160211	-0.3406	0.64634	-0.0210876	0.941369	-0.0365976	0.913059
ankyrin repeat domain-containing protein	ZMO0035	ZMO0035	0.223422	0.36283	0.441128	0.022	0.23807	0.398378	0.172389	0.746585
DUF1491 domain-containing protein	ZMO0036	ZMO0036	-0.143646	0.824435	0.0487995	0.920398	0.049504	0.884398	0.0690638	0.870536
PTS IIA-like nitrogen-regulatory protein PtsN/NagE	nagE1	ZMO0037	-0.297759	0.666844	0.0447102	0.813954	0.28981	0.201161	0.17554	0.570121
ribosomal protein S30Ae/sigma 54 modulation protein	ZMO0038	ZMO0038	0.145302	0.650681	0.266273	0.116809	0.100169	0.801165	0.137203	0.651121
DNA polymerase III epsilon subunit	dnaQ	ZMO0039	-0.220629	0.239658	-0.0525519	0.69806	-0.00723394	0.979374	0.357896	0.244689
dephospho-CoA kinase	coaE	ZMO0040	0.0997467	0.69165	0.114179	0.454598	0.170492	0.203636	0.0794589	0.783353
shikimate 5-dehydrogenase	aroE	ZMO0041	-0.141856	0.629641	0.0898482	0.493871	0.0727317	0.475115	0.018863	0.952861
Maf family protein	ZMO0043	ZMO0043	0.0307732	0.981811	0.0778675	0.623024	0.223382	0.275689	0.302511	0.173563
Sel1 domain protein repeat-containing protein	ZMO0044	ZMO0044	0.222812	0.897551	-0.997161	0.159692	-0.0215403	0.964927	0.539165	0.555388
LysR family transcriptional regulator	ZMO0050	ZMO0050	-0.109441	0.827069	0.0299714	0.932862	0.0642128	0.857626	-0.170404	0.639978
MarR family transcriptional regulator	marR	ZMO0054	0.700775	0.583045	-0.512039	0.708386	0.514057	0.399605	0.413662	0.52185
glucosamine/fructose-6-phosphate isomerizing aminotransferase	glmS	ZMO0056	0.0409171	0.721777	0.070282	0.445878	0.0522353	0.496441	0.0824534	0.700384
bacterial PH domain-containing protein	ZMO0057	ZMO0057	-0.00475121	0.999966	0.0474281	0.633533	0.184479	0.236205	0.0382805	0.631409
glycerate kinase	glxK	ZMO0059	0.311436	0.306019	0.292928	0.133948	0.111853	0.544291	0.385361	0.145736
hypothetical protein	ZMO0060	ZMO0060	0.1876	0.563748	0.0518297	0.899342	0.400508	0.267241	0.2257	0.517495
histidine acid phosphatase	ZMO0061	ZMO0061	-0.213732	0.588212	-0.360011	0.170206	-0.471102	0.188359	-0.190618	0.601704
aldo/keto reductase	ZMO0062	ZMO0062	-0.0765349	0.888901	-0.206887	0.174049	-0.229405	0.23628	0.0355148	0.741358
carbohydrate-selective porin OprB	oprB1	ZMO0064	-0.598932	0.322176	-0.212091	0.670495	1.17001	0.62181	0.379641	0.277388
Sel1 domain protein repeat-containing protein	ZMO0068	ZMO0068	-0.155933	0.69116	-0.274585	0.0845275	-0.152294	0.43013	-0.282335	0.705643
GrxB family glutaredoxin 2	grxB1	ZMO0070	0.0761719	0.84327	0.18309	0.284449	0.269459	0.205229	0.19829	0.403464
NHL repeat-containing protein	ZMO0072	ZMO0072	-0.246094	0.540469	-0.150553	0.148109	-0.133313	0.39197	-0.187821	0.330869
CBS domain-containing protein	ZMO0073	ZMO0073	0.0509688	0.897643	0.0140349	0.909033	0.00124995	0.989671	-0.156732	0.56448
endoribonuclease YbeY	ZMO0074	ZMO0074	-0.197222	0.597449	-0.188124	0.226126	-0.0070591	0.992369	0.0656732	0.732975
PhoH family protein	phoH	ZMO0075	-0.126542	0.491557	0.00975609	0.955084	0.0591291	0.335869	0.0497519	0.709047
MiaB family RNA modification enzyme	miaB	ZMO0077	0.0650984	0.750803	0.431147	0.0151304	0.826857	0.0414545	0.743047	0.0291429
chemotaxis protein CheW	cheW	ZMO0078	-0.211571	0.648529	-0.0709089	0.612838	0.195513	0.359251	0.206078	0.168
response regulator receiver protein	cheY	ZMO0079	0.0649598	0.967348	-0.0257575	0.936187	0.0976652	0.75989	0.116039	0.56566
chemoreceptor glutamine deamidase CheD	cheD	ZMO0080	0.284796	0.610495	0.236334	0.338852	0.574778	0.23481	0.499997	0.0891429
chemotaxis signal transduction response regulator CheB	cheB1	ZMO0081	0.575141	0.08232	0.3001	0.237377	0.544608	0.131591	0.521877	0.278441
CheR-type MCP methyltransferase	cheR	ZMO0082	0.606365	0.0817959	0.414019	0.0703284	0.637385	0	0.700488	0.206
CheA signal transduction histidine kinase	cheA1	ZMO0083	1.39045	0.0690256	0.415328	0.679975	0.558624	0.565427	0.693384	0.396475
methyl-accepting chemotaxis sensory transducer	mcp	ZMO0085	0.526766	0.55549	0.233215	0.272206	0.360807	0.131317	0.300608	0.355457
SpoT/RelA (p)ppGpp synthetase I	ZMO0086	ZMO0086	0.0396996	0.893364	-0.0533619	0.454775	-0.00730832	0.959584	-0.0719814	0.647709
hypothetical protein	ZMO0087	ZMO0087	-0.367294	0.465658	-0.353037	0.329814	-0.372387	0.233415	-0.0819836	0.914029
short-chain dehydrogenase/reductase SDR	ZMO0090	ZMO0090	0.396151	0.28802	0.198351	0.125521	0.0950731	0.438699	0.00956662	0.980245
hypothetical protein	ZMO0092	ZMO0092	0.142976	0.688282	0.262074	0.205362	0.354894	0.234643	0.293662	0.308347
biotin synthase	bioB	ZMO0094	-0.0210972	0.937925	0.0154737	0.943406	0.184129	0.435285	0.081206	0.680223
NAD-dependent epimerase/dehydratase	ZMO0101	ZMO0101	-0.201641	0.632102	-0.249046	0.480396	-0.309299	0.38678	-0.143119	0.583883
beta-lactamase	ZMO0103	ZMO0103	-0.281654	0.506403	-0.206004	0.235654	-0.298766	0.143564	-0.016854	0.963633
3-isopropylmalate dehydratase large subunit	leuC	ZMO0105	-0.0417608	0.821239	0.0662708	0.544323	0.19826	0.320635	-0.0917924	0.660604
3-isopropylmalate dehydratase small subunit	leuD	ZMO0106	0.0263208	0.824394	-0.0238628	0.747246	-0.0252844	0.91861	-0.172174	0.357092
conserved hypothetical protein	ZMO0107	ZMO0107	-0.28728	0.304611	-0.201368	0.214837	-0.29396	0.103102	-0.17282	0.427578
glycosyl transferase family 2	ZMO0110	ZMO0110	0.637795	0.469534	0.140266	0.988582	-0.675439	0.916051	2.3975	0.738722
ABC transporter related protein	ZMO0111	ZMO0111	0.132933	0.35824	0.208073	0.0536207	0.256256	0.106	0.295	0.13986
hypothetical protein	ZMO0112	ZMO0112	0.592199	0.363439	0.500933	0.0537966	0.165672	0.757884	0.189138	0.819826
aminodeoxychorismate synthase component 1 PabB	pabB	ZMO0113	-0.310891	0.271586	0.00463422	0.982872	0.117301	0.692426	0.105479	0.709309
glutamine amidotransferase of anthranilate synthase	trpGD	ZMO0114	-0.421328	0.335071	0.00815519	0.988151	0.15521	0.620832	0.0904217	0.861574
aminotransferase class IV	pabC	ZMO0115	-0.264344	0.485649	-0.118533	0.198245	-0.140748	0.433676	-0.104452	0.388803
BadM/Rrf2 family transcriptional regulator	ZMO0116	ZMO0116	-0.409819	0.060129	-0.103568	0.683403	-0.0919545	0.690321	0.219358	0.673656
hydroxylamine reductase	hcp	ZMO0117	0.276726	0.0564848	-0.0053304	0.968398	0.207643	0.125143	0.287597	0.228657
dihydroorotate dehydrogenase/oxidase	ZMO0120	ZMO0120	0.335423	0.327462	0.0324637	0.847043	-0.178247	0.625019	0.0262998	0.934985
RarA recombination factor-like protein	ZMO0121	ZMO0121	-0.0559063	0.857795	0.0356064	0.734088	0.121203	0.286314	0.1756	0.516367
hypothetical protein	ZMO0122	ZMO0122	0.346336	0.0850182	0.458476	0.0242667	0.223539	0.390204	0.208028	0.203463
ATPase-like protein	ZMO0124	ZMO0124	0.012394	0.987508	0.128014	0.293867	0.105064	0.266325	0.0141182	0.967182
YbaK/EbsC-like prolyl-tRNA editing protein	ZMO0125	ZMO0125	0.0525068	0.615916	0.0918751	0.292577	0.0741361	0.455623	0.137031	0.70841
S1/P1 nuclease	ZMO0127	ZMO0127	-0.147253	0.629991	-0.0481942	0.751148	0.0687313	0.830007	0.359166	0.474467
TonB-dependent receptor	ZMO0128	ZMO0128	-1.44141	0.0694222	-0.634921	0.266118	-1.43083	0.31721	-0.694473	0.277966
acid phosphatase	phoC	ZMO0130	-0.124912	0.86756	-0.461848	0.117166	-0.711014	0.0364444	-0.291955	0.652755
metallophosphoesterase	ZMO0131	ZMO0131	-0.663021	0.328015	-0.395876	0.183326	-0.440364	0.222445	0	1
Sel1 domain protein repeat-containing protein	ZMO0132	ZMO0132	-0.307222	0.82037	1.18689	0.117525	-0.676178	0.814091	0	1
Sel1 domain protein repeat-containing protein	ZMO0133	ZMO0133	-0.154345	0.802365	-0.301928	0.136942	-0.57221	0.286012	1.3729	0.332811
Sel1 domain protein repeat-containing protein	ZMO0137	ZMO0137	0.164644	0.491053	-0.0390116	0.660248	-0.211505	0.526678	0.137748	0.841403
aminoglycoside phosphotransferase	ZMO0139	ZMO0139	-0.0359173	0.89644	-0.0188433	0.903803	0.164837	0.438129	0.264627	0.212468
protein tyrosine phosphatase	ptpA	ZMO0140	-0.0741628	0.8028	0.19919	0.284265	0.179321	0.19041	0.323067	0.224189
YggS family pyridoxal phosphate enzyme	ZMO0142	ZMO0142	0.188438	0.535328	0.15631	0.225633	0.130854	0.338355	0.0727787	0.760811
ABC transporter related protein	ZMO0143	ZMO0143	-0.116647	0.636697	-0.0435003	0.706493	-0.0141481	0.958515	-0.0667006	0.681077
L-aspartate oxidase	nadB	ZMO0144	0.0696894	0.794565	0.0818405	0.144973	0.191463	0.0449231	0.183238	0.14742
peptidase M28	ZMO0145	ZMO0145	-0.681942	0.132709	-0.566844	0.0863368	-0.97315	0.183686	-0.967374	0.552336
hypothetical protein	ZMO0148	ZMO0148	-0.0571683	0.834357	-0.0605831	0.531563	-0.0525049	0.8376	-0.0500755	0.938887
tRNA (guanine-N(7)-)-methyltransferase	trmB	ZMO0149	0.208925	0.778534	0.409435	0.0866256	0.265924	0.240542	0.232427	0.362398
GCN5-related N-acetyltransferase	ZMO0150	ZMO0150	0.231609	0.329389	0.455786	0.0256296	0.478673	0.202313	0.416008	0.269702
pyruvate kinase	pyk	ZMO0152	0.161519	0.372434	0.199767	0.0345753	0.182009	0.283655	0.08358	0.75893
YebC/PmpR family DNA-binding regulatory protein	yebC	ZMO0153	0.142007	0.660221	0.083299	0.421291	0.139921	0.342303	0.179114	0.154137
crossover junction endodeoxyribonuclease RuvC	ruvC	ZMO0154	0.235343	0.821273	-0.0940367	0.762425	0.104998	0.745474	-0.11902	0.692586
Holliday junction DNA helicase RuvA	ruvA	ZMO0155	0.0375144	0.964313	0.0525538	0.580945	0.0960566	0.796959	0.0554701	0.8906
hypothetical protein	ZMO0156	ZMO0156	0.939299	0.18385	0.818708	0.0523509	0.666217	0.104279	0.629243	0.14897
lactate dehydrogenase LdhA	lhdA	ZMO0157	-0.0482566	0.460288	0.088466	0.24323	0.140168	0.389746	0.0280005	0.896563
Holliday junction DNA helicase RuvB	ruvB	ZMO0158	0.0628529	0.608482	0.0733471	0.34652	0.133588	0.320585	0.101363	0.442935
thioesterase superfamily protein	ZMO0160	ZMO0160	-0.211526	0.691629	-0.0381514	0.903861	-0.13744	0.529245	0.162811	0.54267
MotA/TolQ/ExbB proton channel	tolQ	ZMO0161	-0.286046	0.635929	-0.137832	0.593587	-0.209463	0.652207	-0.20605	0.44798
Tol-Pal cell envelope complex membrane spanning protein TolR	tolR	ZMO0162	-0.193101	0.538	-0.259546	0.167598	-0.307888	0.191273	-0.341263	0.19
Tol-Pal cell envelope complex membrane achoring protein TolA	tolA	ZMO0164	-0.248154	0.665303	-0.253408	0.0475849	-0.166652	0.599416	-0.216974	0.29033
Tol-Pal envelope complex beta propeller repeat protein TolB	tolB	ZMO0165	0.0598577	0.826139	-0.0736167	0.542875	-0.160816	0.441712	-0.287628	0.363951
peptidoglycan-associated lipoprotein	ZMO0166	ZMO0166	-0.386686	0.429668	-0.293603	0.0485	-0.247276	0.299319	-0.453055	0.14774
short-chain dehydrogenase/reductase	ZMO0169	ZMO0169	0.404087	0.304956	0.315652	0.0764317	0.292289	0.232534	0.467025	0.170578
thiamine biosynthesis protein ThiC	thiC	ZMO0172	-1.01514	0.136118	-0.215343	0.146684	-0.11578	0.614353	0.119906	0.450904
cell division protein ZapA	zapA	ZMO0173	0.0476615	0.861988	0.0787926	0.546161	0.139679	0.197843	0.243812	0.333643
putative SnoaL-like polynucleotide cyclase	ZMO0174	ZMO0174	-0.0192998	0.970942	-0.0875683	0.817951	-0.169868	0.668286	0.0802816	0.772771
hypothetical protein	ZMO0175	ZMO0175	-0.12237	0.888154	0.107567	0.696744	0.160456	0.556319	0.356066	0.266829
transketolase	tklB	ZMO0176	0.0969264	0.598108	-0.0399825	0.610831	0.0836786	0.658581	-0.0522111	0.712865
type I glyceraldehyde-3-phosphate dehydrogenase	gap	ZMO0177	0.311979	0.24077	0.31369	0.0232222	0.248568	0.134839	0.342641	0.150965
phosphoglycerate kinase	pgk	ZMO0178	0.199627	0.349489	0.237044	0.00752941	0.183952	0.204372	0.130438	0.604465
fructose-bisphosphate aldolase	fbaB	ZMO0179	0.00355212	0.997721	0.124515	0.261686	0.190538	0.321407	-0.070769	0.580084
1-hydroxy-2-methyl-2-(E)-butenyl 4-diphosphate synthase	ispG	ZMO0180	-0.0527229	0.787976	-0.0828247	0.0521786	-0.149237	0.331813	0.280331	0.158426
S-adenosyl-L-homocysteine hydrolase	ahcY	ZMO0182	-0.0901489	0.516624	-0.109444	0.297234	0.0389531	0.819605	-0.10976	0.291898
ABC transporter-like protein	ZMO0183	ZMO0183	0.0633456	0.74396	-0.0160866	0.936603	0.0932821	0.758231	-0.047348	0.702204
cysteinyl-tRNA synthetase	cysS	ZMO0186	0.0359592	0.896909	-0.0465946	0.749985	-0.139949	0.441212	-0.0978158	0.630985
3-deoxy-7-phosphoheptulonate synthase	aroH	ZMO0187	0.00874011	0.988907	-0.126732	0.170441	-0.122688	0.283892	-0.194181	0.323557
outer membrane receptor for ferric iron uptake	fhuE	ZMO0188	-1.85404	0.0708421	-1.72732	0.0796053	-1.63974	0.104571	-1.91098	0.209391
L-serine dehydratase 1	sdaA	ZMO0189	0.0936489	0.832285	-0.0183576	0.908944	0.0451304	0.760797	0.0298341	0.810866
RpiR family transcriptional regulator	ZMO0190	ZMO0190	-0.00301679	1	0.0299625	0.936081	0.134036	0.518331	0.237693	0.395592
DSBA oxidoreductase	ZMO0191	ZMO0191	-0.0411911	0.895728	-0.112715	0.247745	-0.115271	0.603084	-0.181714	0.226673
putative Zn-dependent metallopeptidase	ZMO0192	ZMO0192	0.561335	0.448523	0.00358136	0.988428	0.135646	0.592085	-0.521016	0.333864
Rne/Rng family ribonuclease	ZMO0193	ZMO0193	0.0447172	0.758254	0.0766627	0.594867	0.125421	0.714518	0.0400378	0.884621
N-acetylmuramoyl-L-alanine amidase	amiA	ZMO0195	-0.932955	0.357821	-0.902067	0.0822651	0.504396	0.468212	-0.838913	0.651451
1A family penicillin-binding protein	ZMO0197	ZMO0197	0.0159696	0.98712	-0.148702	0.437114	-0.0545794	0.870527	-0.393386	0.135129
peptide chain release factor 2	prfB	ZMO0198	0.0344321	0.917494	0.0713113	0.587724	0.0243219	0.828947	0.0473652	0.72112
SOS-response transcriptional repressor LexA	lexA	ZMO0199	-0.357132	0.487867	-0.119963	0.625412	-0.038421	0.921246	0.159557	0.583046
anthranilate phosphoribosyltransferase	trpD	ZMO0200	-0.00403722	0.998704	-0.153449	0.174549	-0.155189	0.103556	-0.140644	0.582463
glutamine amidotransferase of anthranilate synthase	trpG	ZMO0201	0.0164839	0.973913	-0.0440814	0.757721	0.0454006	0.894387	0.190553	0.380699
methyl-accepting chemotaxis sensory transducer	mcpA1	ZMO0202	0.698573	0.04	0.589882	0.0856	0.805258	0.107586	0.650493	0.154958
MerR family transcriptional regulator	pbrR	ZMO0203	0.961984	0.539144	-1.10839	0.22595	-0.421923	0.636186	-0.112268	0.88472
NAD-dependent epimerase/dehydratase	ZMO0205	ZMO0205	0.104041	0.82153	0.188206	0.387093	0.212296	0.430759	0.273448	0.222173
glutamate 5-kinase	proB	ZMO0206	0.265451	0.282562	0.149843	0.10557	0.0918992	0.566379	0.177974	0.466395
GTP-binding protein Obg/CgtA	obgE	ZMO0207	0.142046	0.659251	0.133111	0.14593	0.255198	0.133404	0.193071	0.137669
GCN5-related N-acetyltransferase	ZMO0208	ZMO0208	0.0938168	0.803197	0.246639	0.225675	0.0785306	0.819556	0.590183	0.152938
ribosomal protein L27	rpmA	ZMO0209	0.0466728	0.926738	0.101437	0.225212	0.160648	0.25653	0.157204	0.366063
ribosomal protein L21	rplU	ZMO0211	0.110526	0.605657	-0.0238152	0.920182	0.0359427	0.770344	0.217953	0.347043
5-formyltetrahydrofolate cyclo-ligase	ZMO0215	ZMO0215	0.0318642	0.932972	0.124999	0.427851	0.261555	0.338	0.0419286	0.835544
putative DEAD/DEAH box helicase	helY	ZMO0219	0.0701733	0.83129	0.0039018	0.988495	0.174325	0.322301	0.0678387	0.7298
ferredoxin	fdxA	ZMO0220	-0.124208	0.691283	-0.0998904	0.357252	-0.0374565	0.801709	-0.051	0.856495
CarD family transcriptional regulator	ZMO0221	ZMO0221	-0.0160783	0.988299	-0.155331	0.127461	0.0472895	0.855429	0.309694	0.20534
DUF1330 domain-containing protein	ZMO0222	ZMO0222	0.0597242	0.892993	-0.205362	0.0801975	0.00764147	0.986044	0.0528113	0.943194
putative auto-transporter adhesin head GIN domain	ZMO0223	ZMO0223	-0.395799	0.602166	0.843655	0.364073	-0.588449	0.447053	-0.217934	0.643531
putative methionine biosynthesis methylase MetW	metW	ZMO0224	-0.0506236	0.923221	0.307163	0.147786	0.152505	0.652128	0.284517	0.368046
homoserine O-acetyltransferase	metX	ZMO0225	0.295263	0.489169	0.218294	0.306841	0.37923	0.332376	0.139177	0.642032
short-chain dehydrogenase/reductase SDR	sdh	ZMO0226	0.0675837	0.906701	-0.078378	0.341978	0.0506878	0.715309	-0.123898	0.677486
DNA polymerase I	polA	ZMO0227	-0.156338	0.071	-0.148163	0.0426	-0.082976	0.133103	-0.0129325	0.967359
ferric enterobactin transport ATP-binding protein FepC	fepC	ZMO0230	0.09176	0.77949	-0.382317	0.342098	-0.0131842	0.991878	-0.446948	0.721721
conserved hypothetical protein	ZMO0231	ZMO0231	0.408466	0.538839	0.251982	0.293587	0.177958	0.663585	0.0624377	0.945184
SpoU type tRNA/rRNA methyltransferase	ZMO0232	ZMO0232	-0.0645053	0.667023	-0.136305	0.180166	-0.138814	0.447115	0.117754	0.357266
conserved hypothetical protein	ZMO0233	ZMO0233	-0.223842	0.634766	-0.0129286	0.983515	-0.168166	0.461321	-0.0526377	0.851142
protease Do	ZMO0234	ZMO0234	-0.101527	0.485834	-0.20517	0.132205	-0.171413	0.432944	-0.10296	0.568612
Mrp family Chromosome partitioning ATPase	ZMO0236	ZMO0236	0.237698	0.51351	0.107071	0.668951	0.00383886	0.991331	0.331657	0.355361
ATP synthase F1 delta subunit	atpH	ZMO0238	0.190733	0.683303	0.115835	0.316378	-0.0784238	0.851274	0.0142365	0.979296
ATP synthase F0F1 alpha subunit	atpA	ZMO0239	0.104135	0.566486	0.141571	0.104541	0.0833766	0.577919	0.0778058	0.503796
ATP synthase F0F1 gamma subunit	atpG1	ZMO0240	0.190586	0.485738	0.146694	0.132604	0.111037	0.558766	0.0193164	0.800199
ATP synthase F0F1 beta subunit	atpD	ZMO0241	0.133902	0.51387	0.159837	0.117301	0.0916417	0.524338	0.141065	0.180939
ATP synthase F0F1 epsilon subunit	atpC	ZMO0242	-0.0146179	0.987114	0.197624	0.294468	0.0773169	0.400859	0.0792306	0.567857
conserved hypothetical protein	ZMO0243	ZMO0243	-0.333871	0.512603	-0.297529	0.344895	-0.330514	0.285843	-0.114135	0.50777
HU family DNA-binding protein	ZMO0244	ZMO0244	-0.25901	0.375347	0.000887553	0.997061	-0.065656	0.82003	-0.154231	0.384781
ATP-dependent protease subunit HslV	hslV	ZMO0246	0.0578645	0.90236	0.266303	0.147309	0.264618	0.402968	0.144092	0.632641
heat shock protein ATPase subunit HslU	hslU	ZMO0247	0.298173	0.324282	0.325848	0.0533445	0.316012	0.237247	0.162937	0.417051
ribosomal protein L33	rpmG	ZMO0249	0.192914	0.586359	0.0890776	0.593974	0.0227521	0.906083	0.101608	0.511449
response regulator receiver protein	ZMO0250	ZMO0250	0.235198	0.779359	-0.261521	0.476252	0.288874	0.184913	0.295647	0.421043
putative enamine deaminase RidA/yjgF	ZMO0251	ZMO0251	0.0129306	0.98283	0.0452544	0.826234	0.102844	0.665666	0.0506585	0.757341
major intrinsic protein	ZMO0252	ZMO0252	-1.95585	0.0382222	-2.22443	0	-2.21119	0.038	-2.09183	0.19619
TolC family type I secretion outer membrane protein	tolC	ZMO0253	-1.87869	0.0344	-2.13214	0.0268824	-2.63831	0.102375	-2.21872	0.155871
type I secretion system ATPase	cyaB	ZMO0254	-1.23288	0.0673	-1.12346	0	-1.00291	0.0990244	-1.03185	0.0511111
HlyD family type I secretion membrane fusion protein	hlyD	ZMO0255	-1.51454	0.027	-1.1208	0.0064	-1.18331	0.106629	-1.23336	0.1395
D-lactate dehydrogenase	ZMO0256	ZMO0256	-0.118435	0.633134	-0.0187232	0.939901	0.0215276	0.9509	-0.223606	0.405567
winged helix family two component transcriptional regulator	ZMO0257	ZMO0257	-0.000459035	0.999777	-0.0594412	0.741881	-0.0415122	0.882091	-0.00572968	0.983771
histidine kinase	ZMO0258	ZMO0258	0.28456	0.315165	-0.0951939	0.342142	-0.109533	0.60442	-0.0465876	0.861965
heme exporter protein CcmA	ccmA	ZMO0260	0.233239	0.778501	-0.51517	0.66606	0.357491	0.645551	-0.496026	0.673527
hypothetical protein	ZMO0263	ZMO0263	0.0322018	0.906399	-0.0881392	0.62368	-0.14673	0.360399	0.100474	0.686842
hypothetical protein	ZMO0264	ZMO0264	-0.183473	0.504444	-0.292761	0.0788767	-0.157247	0.505899	-0.108581	0.59857
hypothetical protein	ZMO0265	ZMO0265	0.331741	0.333821	-0.0598145	0.755687	-0.144039	0.438949	-0.235051	0.566454
hypothetical protein	ZMO0266	ZMO0266	0.0584056	0.736263	-0.315556	0.248694	-0.386307	0.598823	-0.313995	0.663879
hypothetical protein	ZMO0267	ZMO0267	-0.601096	0.194492	-0.0543594	0.879534	0.0186164	0.959689	-0.232455	0.705671
hypothetical protein	ZMO0268	ZMO0268	-0.053676	0.891803	0.0219733	0.935894	0.0502167	0.863208	-0.265561	0.508336
hypothetical protein	ZMO0269	ZMO0269	0.167768	0.451499	0.0164261	0.937505	-0.0262712	0.934471	-0.103366	0.824561
hypothetical protein	ZMO0270	ZMO0270	0.0681019	0.791728	-0.0796102	0.238441	-0.0538101	0.71361	-0.105715	0.753389
apolipoprotein N-acyltransferase	lnt	ZMO0271	0.152627	0.666594	0.1059	0.81929	0.263666	0.612934	0.204493	0.439757
S-adenosylmethionine synthase	metK	ZMO0273	-0.0630595	0.470535	0.000106812	0.999009	0.109665	0.623161	0.0677541	0.540358
RNA polymerase factor sigma-54	rpoN	ZMO0274	0.0696487	0.795039	0.0851339	0.803845	0.316817	0.479879	0.0654488	0.824359
ABC transporter related protein	ZMO0275	ZMO0275	-0.273289	0.302064	-0.267724	0.0700923	-0.178043	0.229668	-0.151416	0.267785
OstA family protein	ZMO0276	ZMO0276	-0.0389525	0.905114	-0.153129	0.221764	-0.0680968	0.852698	-0.448964	0.375474
LPS export ABC transporter LptC	lptC	ZMO0277	-0.265999	0.86682	0.136508	0.852087	-0.104787	0.90145	0.020244	0.981371
ribonuclease D	rnd1	ZMO0278	-0.0229886	0.960105	-0.0296179	0.938706	-0.0035979	0.991195	-0.0701275	0.808224
putative cold-shock DNA-binding protein	ZMO0279	ZMO0279	-0.0532621	0.786481	0.088974	0.131243	0.215767	0.205118	0.171288	0.250725
TetR family transcriptional repressor of RND efflux transport system	ZMO0281	ZMO0281	0.473282	0.329256	0.41129	0.0692331	0.445238	0.098087	0.421397	0.267929
MFP subunit of RND efflux system transporter	ZMO0282	ZMO0282	2.22207	0.036	2.04466	0	1.98497	0	1.9773	0
hydrophobe/amphiphile efflux-1 (HAE1) family RND efflux system transporter	ZMO0283	ZMO0283	2.18384	0	2.09309	0	2.12864	0	2.0516	0
NodT family RND efflux system outer membrane lipoprotein	ZMO0285	ZMO0285	2.05274	0.0308571	2.09232	0	2.00124	0	2.01923	0.034
DUF541 domain-containing protein	ZMO0286	ZMO0286	-0.081227	0.896517	-0.0875549	0.681837	-0.365529	0.232058	-0.217315	0.376071
MFP subunit of RND efflux system transporter	ZMO0287	ZMO0287	-0.201673	0.240654	-0.330034	0.0251636	-0.293969	0.205616	-0.330398	0.161067
DUF445 domain-containing protein	ZMO0290	ZMO0290	-0.0276814	0.944417	0.184018	0.156387	0.269313	0.283562	0.164846	0.62346
prolipoprotein diacylglyceryl transferase	lgt	ZMO0291	0	1	-0.494121	0.66543	0	1	0	1
sugar transporter	ZMO0293	ZMO0293	0.145089	0.39867	-0.00110054	0.998122	-0.078879	0.877027	-0.107804	0.695099
ribosomal protein L28	ZMO0294	ZMO0294	0.0763563	0.898526	0.0117124	0.9642	0.0635026	0.8	0.072499	0.617267
tRNA-specific adenosine deaminase	ZMO0296	ZMO0296	0.232172	0.779732	0.178808	0.517378	0.306841	0.362847	0.100338	0.7118
HlyC/CorC family transporter	ZMO0297	ZMO0297	0.0877463	0.516227	0.0887814	0.35718	-0.0155805	0.957601	0.108248	0.582779
conserved hypothetical protein	ZMO0298	ZMO0298	0.376715	0.359438	0.246923	0.147376	0.294461	0.359382	0.362103	0.171294
phosphoribosylamine--glycine ligase	purD	ZMO0299	0.0669041	0.821154	0.039046	0.569715	0.081735	0.744507	0.10766	0.706098
exodeoxyribonuclease VII large subunit	xseA	ZMO0300	-0.0485325	0.907416	0.02082	0.92119	0.00535202	0.986193	0.0349496	0.862984
PepSY-associated TM helix domain protein	ZMO0301	ZMO0301	0.342958	0.821043	-0.17374	0.435267	-0.111245	0.842689	-0.241314	0.566625
aryl-sulfate sulfotransferase	ZMO0302	ZMO0302	0	1	1.29104	0.198561	0	1	0	1
ferrochelatase	hemH	ZMO0303	-0.764231	0.115869	-0.691028	0.0480381	-0.637112	0.106667	-0.456213	0.182
stress responsive alpha-beta barrel domain protein	ZMO0305	ZMO0305	0.190769	0.550449	0.0331243	0.935348	-0.249766	0.440129	-0.0278536	0.942158
glycosyl transferase group 1	ZMO0306	ZMO0306	-0.0282307	0.908275	0.00745964	0.921452	-0.0574067	0.838713	-0.133471	0.656627
capsule polysaccharide biosynthesis protein	kpsC	ZMO0307	0.108402	0.488739	0.121157	0.345193	0.0269464	0.893977	0.0461203	0.821061
short-chain dehydrogenase/reductase SDR	ZMO0309	ZMO0309	-0.0539691	0.911759	0.146881	0.31592	-0.127756	0.458893	-0.107257	0.684117
pyrroline-5-carboxylate reductase	proC1	ZMO0311	-0.118054	0.525677	-0.148334	0.17636	-0.034984	0.884382	-0.214013	0.424501
amidohydrolase	ZMO0312	ZMO0312	0.050368	0.907079	0.0738106	0.272364	0.141881	0.190307	0.00449371	0.987919
conserved hypothetical protein	ZMO0313	ZMO0313	-0.698853	0.451589	-0.0430559	0.935319	0.00873947	0.985942	-0.273629	0.445553
cardiolipin synthetase	cls	ZMO0314	-0.141167	0.786133	0.0950076	0.527561	0.0453478	0.918035	0.116906	0.712483
hypothetical protein	ZMO0315	ZMO0315	-0.332461	0.722598	-0.28398	0.0477037	0.0224876	0.974857	-0.401414	0.179933
short-chain dehydrogenase/reductase SDR	ZMO0318	ZMO0318	0.788474	0.0711489	0.852008	0	0.658792	0.0472	0.617058	0.169825
WGR domain protein	ZMO0319	ZMO0319	0	1	1.47977	0.309128	-0.655303	0.699931	-0.248772	0.891252
dihydrofolate reductase region	dhfrIII	ZMO0321	-0.229384	0.691214	0.03309	0.880769	-0.0776539	0.760706	0.460532	0.268735
riboflavin biosynthesis protein RibF	ribF	ZMO0322	0.159709	0.710777	0.115997	0.377881	0.0656687	0.778725	0.277629	0.339152
isoleucyl-tRNA synthetase	ileS	ZMO0323	-0.13054	0.0327273	-0.110085	0.170685	-0.126086	0.43039	-0.211239	0.493099
conserved hypothetical protein	ZMO0325	ZMO0325	-0.145793	0.82397	-0.306895	0.48408	-0.344896	0.468507	-0.360618	0.398389
7-cyano-7-deazaguanine reductase	ZMO0326	ZMO0326	0.231148	0.821146	0.016105	0.945776	-0.201812	0.359826	-0.203433	0.253271
cystathionine beta-lyase	metC	ZMO0327	0.0193488	0.940091	-0.00798861	0.951529	0.00600433	0.978127	0.0972697	0.332325
translation elongation factor P	efp	ZMO0328	-0.0926571	0.614118	-0.0147018	0.940287	0.166819	0.33882	0.141085	0.397451
inositol monophosphatase	cbbF1	ZMO0329	-0.184085	0.360368	-0.0221945	0.734249	-0.0764427	0.722077	-0.126959	0.583918
DUF882 domain-containing protein	ZMO0331	ZMO0331	-0.467205	0.486519	0.685115	0.293991	1.19544	0.332267	0.943787	0.397662
thiamine phosphate synthase	thiE1	ZMO0332	0.000623703	1	-0.0701402	0.817912	0.0396449	0.892517	0.0754	0.683511
ATPase MipZ	ZMO0335	ZMO0335	0.167832	0.303072	0.218643	0.0994128	0.158341	0.232117	0.0991319	0.568026
heat shock protein DnaJ domain protein	ZMO0336	ZMO0336	0.0295258	0.988941	-0.132708	0.407392	0.264472	0.477341	-0.654264	0.452169
phosphomannomutase	exoC	ZMO0339	0.219262	0.321385	0.186689	0.118432	0.0785624	0.558039	0.107538	0.627035
short-chain dehydrogenase/reductase SDR	ZMO0341	ZMO0341	-0.242946	0.363858	-0.0792408	0.550955	-0.0183131	0.957277	-0.144595	0.524156
aspartate aminotransferase	aspB	ZMO0342	0.0828673	0.692494	-0.133887	0.242819	-0.159122	0.334113	-0.259236	0.439923
aminotransferase class IV	ZMO0343	ZMO0343	-0.137599	0.28227	-0.0211773	0.929602	-0.0692698	0.668855	-0.157592	0.456076
peptidase U62 modulator of DNA gyrase	ZMO0344	ZMO0344	-0.045866	0.743018	0.0549857	0.144173	0.0366287	0.82738	-0.0110321	0.980269
endonuclease/exonuclease/phosphatase	ZMO0345	ZMO0345	-0.256781	0.541135	-0.0719471	0.44983	-0.228456	0.3	0.0373618	0.869341
ammonium transporter	amtB	ZMO0346	-0.0855497	0.938569	-0.341325	0.217194	0.0281436	0.960108	-0.307833	0.279875
RNA chaperone Hfq	hfq	ZMO0347	0.20344	0.665439	0.295514	0.131655	0.274995	0.265877	0.206479	0.27106
GTP-binding proten HflX	hflX	ZMO0348	0.121417	0.637403	0.0446733	0.0987281	0.172642	0.233425	0.0140966	0.860957
DUF179 domain-containing protein	ZMO0349	ZMO0349	-0.261662	0.891799	3.87828e-05	0.999301	0.0212549	0.899647	0.319906	0.317143
putative ParB-like nuclease	ZMO0350	ZMO0350	0.028258	0.978923	0.159329	0.118192	-0.0238266	0.897064	0.20244	0.299125
putative DNA helicase	ZMO0351	ZMO0351	-0.143735	0.316435	-0.11397	0.473347	-0.0218131	0.90788	0.00686582	0.983836
hypothetical protein	ZMO0352	ZMO0352	0.197311	0.561297	0.141001	0.170866	0.232761	0.212241	0.187169	0.136096
4-diphosphocytidyl-2C-methyl-D-erythritol synthase	ZMO0353	ZMO0353	0.117928	0.585395	0.104545	0.349296	0.228315	0.0790588	0.258087	0.147481
DNA mismatch repair protein MutL	mutL	ZMO0354	-0.172901	0.271773	-0.0281417	0.750155	0.0555579	0.709753	-0.130145	0.442175
MreB/Mrl family cell shape determining protein	mreB	ZMO0355	-0.18553	0.289453	-0.212521	0.0472245	-0.105108	0.616205	-0.181562	0.232308
rod shape-determining protein MreC	mreC	ZMO0356	-0.266935	0.380164	-0.284719	0.110286	-0.473387	0.160203	-0.443663	0.183457
peptidoglycan D,D-transpeptidase MrdA	mrdA	ZMO0359	0.0684624	0.728883	0.0158386	0.950885	-0.140373	0.688941	0.0496724	0.810331
hypothetical protein	ZMO0361	ZMO0361	-0.168442	0.813833	-0.768218	0.0549667	-0.923165	0.0256	-0.717414	0.149684
excinuclease ABC B subunit	uvrB	ZMO0362	-0.442121	0.0466667	-0.00816027	0.937422	0.0499287	0.81276	-0.117577	0.455657
tRNA-guanine(34) transglycosylase	tgt	ZMO0363	0.206024	0.639769	0.0116011	0.93329	0.141715	0.579061	-0.00918643	0.964947
DNA ligase (NAD(+)) LigA	ligA	ZMO0364	-0.0542736	0.691544	-0.028396	0.904834	0.0475184	0.842453	-0.00908724	0.97807
glucose facilitated diffusion protein	glf	ZMO0366	0.222374	0.384523	0.168441	0.310684	0.0845629	0.775847	0.0677471	0.581823
glucose-6-phosphate 1-dehydrogenase	zwf	ZMO0367	0.237366	0.308838	0.26114	0.0241	0.202339	0.233551	0.114208	0.570137
6-phosphogluconate dehydratase	edd	ZMO0368	0.195136	0.155146	0.143172	0.026125	0.108507	0.392462	0.068662	0.773096
glucokinase	glk	ZMO0369	0.106926	0.629737	0.164988	0.189366	0.197407	0.139919	0.0922394	0.517105
aspartate racemase	racX	ZMO0371	0.121393	0.782767	0.298066	0.130762	0.0484168	0.856104	0.228992	0.562848
AsnC family transcriptional regulator	ZMO0372	ZMO0372	-0.294214	0.877842	0	1	1.10953	0.646382	0.557589	0.746861
levansucrase	sacB	ZMO0374	0.262232	0.824193	-0.35466	0.417754	0.510813	0.430234	-1.11521	0.468799
levansucrase/invertase	sacC	ZMO0375	1.45114	0.638701	0.375369	0.820032	-0.182859	0.952879	0.282973	0.517838
endopeptidase La	lon1	ZMO0376	0.0824598	0.591731	-0.0511799	0.173792	-0.0526689	0.715762	-0.336057	0.152554
3-methyladenine DNA glycosylase/8-oxoguanine DNA glycosylase AlkA	alkA	ZMO0377	-0.162402	0.845689	-0.0601228	0.780559	-0.346916	0.187665	-0.198911	0.398314
hypothetical protein	ZMO0398	ZMO0398	0	1	0	1	0	1	0.394126	0.896243
diguanylate cyclase/phosphodiesterase	ZMO0401	ZMO0401	0.168626	0.383018	0.182732	0.370964	0.0530262	0.899514	-0.00565402	0.991853
ribosomal RNA methyltransferase RrmJ/FtsJ	ftsJ	ZMO0402	-0.00351143	0.998743	-0.155474	0.0958113	-0.179832	0.200417	-0.0902812	0.684421
Ppx/GppA phosphatase	ppx1	ZMO0403	-0.169543	0.693248	0.101324	0.666651	0.0879192	0.758967	-0.00318909	0.987357
ATP-dependent Clp protease ATP-binding subunit clpA	clpA	ZMO0405	-0.0901229	0.734855	-0.149072	0.221532	-0.021534	0.91871	-0.0776704	0.70619
ABC-2 type transporter	ZMO0406	ZMO0406	0.187114	0.89488	0.0895093	0.85357	-0.0326786	0.945147	-0.105273	0.753424
GcrA cell cycle regulator	ZMO0407	ZMO0407	-7.82013e-05	0.999683	0.195196	0.0890962	0.0145264	0.958756	-0.00394821	0.987076
acetylornithine and succinylornithine aminotransferase	argD	ZMO0408	0.00753021	0.9927	-0.110898	0.133898	-0.114723	0.607596	-0.0643202	0.781064
ornithine carbamoyltransferase	argF	ZMO0409	-0.256923	0.435497	0.028656	0.884213	-0.115993	0.608606	-0.193099	0.623977
Hsp33-like chaperonin hslO	hslO	ZMO0410	0.0118752	0.989075	-0.14312	0.221901	-0.146908	0.247595	-0.33223	0.177311
DNA topoisomerase IV B subunit	gyrB1	ZMO0411	-0.0215511	0.951228	-0.107535	0.165733	0.0864595	0.438851	0.00847308	0.964999
YggT family protein	ZMO0413	ZMO0413	-0.235919	0.771725	-0.177592	0.757506	0.192989	0.651851	-0.0155703	0.981779
MJ0042 family finger-like protein	ZMO0414	ZMO0414	-0.0774034	0.635582	-0.0220178	0.908091	-0.0994841	0.47914	-0.100705	0.649191
cell division ATP-binding protein FtsE	ftsE	ZMO0416	0.0205148	0.90144	0.255662	0.111544	0.0296714	0.870796	0.124787	0.583313
1-acyl-sn-glycerol-3-phosphate acyltransferase PlsC	plsC	ZMO0419	0.0738926	0.824015	0.0793667	0.600047	0.0759157	0.851344	0.0702483	0.699925
prephenate dehydratase	tyrC	ZMO0420	-0.0111891	0.987349	0.173152	0.292055	0.201132	0.27476	0.0022316	0.991295
histidinol-phosphate aminotransferase HisC	hisC2	ZMO0421	0.106056	0.159447	0.078296	0.483777	0.109618	0.391246	-0.0360915	0.857048
BadM/Rrf2 family transcriptional regulator	ZMO0422	ZMO0422	0.712119	0.539727	0.0190951	0.939115	0.237741	0.320104	0.349016	0.448299
FeS assembly protein SufB	sufB	ZMO0423	0.173405	0.498183	0.203109	0.193472	0.0435543	0.818976	0.171132	0.247368
FeS assembly ATPase SufC	sufC	ZMO0425	0.0231018	0.949273	0.112261	0.308767	0.172492	0.287042	0.0817388	0.660646
FeS assembly protein SufD	sufD	ZMO0426	0.366255	0.357734	0.10797	0.385793	0.0962029	0.40308	0.141069	0.547136
SufS subfamily cysteine desulfurase	sufS	ZMO0427	0.176531	0.429288	0.155259	0.186797	0.0961564	0.702593	0.0652523	0.701029
FeS assembly SUF system protein	ZMO0428	ZMO0428	-0.715258	0.743947	0.246646	0.782846	0.163074	0.877597	-0.675887	0.523334
iron-sulfur cluster assembly accessory protein	ZMO0429	ZMO0429	-0.116151	0.499287	0.136276	0.525404	0.2089	0.203276	-0.158766	0.522626
pyrimidine 5'-nucleotidase	ZMO0430	ZMO0430	0.157001	0.695954	-0.243053	0.279082	-0.178414	0.403579	-0.293695	0.146598
2,3,4,5-tetrahydropyridine-2,6-dicarboxylate N-succinyltransferase	dapD	ZMO0431	0.245631	0.420858	0.19026	0.144914	0.170878	0.456725	-0.107725	0.707928
ureohydrolase-like protein	rocF	ZMO0432	0.113712	0.683193	0.030105	0.82513	-0.259846	0.292032	-0.0605901	0.453657
guanylate kinase	gmk	ZMO0433	0.0915578	0.735427	0.00560061	0.965286	-0.00633812	0.965282	-0.0205771	0.964468
hypothetical protein	ZMO0435	ZMO0435	0.116085	0.821483	-0.0144869	0.951962	-0.0896314	0.756352	-0.0502014	0.935112
MAPEG (Membrane Associated Proteins in Eicosanoid and Glutathione metabolism) family protein	ZMO0436	ZMO0436	-1.05561	0.557773	-0.840956	0.353997	-1.53781	0.318369	-1.10085	0.591719
RluC/D family pseudouridine synthase	rluC	ZMO0439	0.0276559	0.950102	-0.0264664	0.735856	0.0172195	0.917464	0.00827916	0.80804
ATP12 ATPase	ZMO0441	ZMO0441	0.175411	0.0854286	0.225272	0.0713333	0.288507	0.130625	0.364598	0.139327
HAD (haloacid dehalogenase) family phosphatase	ZMO0442	ZMO0442	0.0344594	0.964275	-0.0419496	0.892839	-0.145564	0.607009	-0.108438	0.841795
ribonucleotide-diphosphate reductase subunit beta	nrdF	ZMO0443	0.684664	0.234676	0.440189	0.117966	0.463744	0.197747	0.954121	0.159179
lipolytic protein G-D-S-L family	ZMO0444	ZMO0444	0.179576	0.620494	0.0711797	0.104018	-0.0134557	0.96998	0.0869999	0.639145
GDSL lipase/esterase	ZMO0445	ZMO0445	0.0305983	0.952653	-0.0935911	0.647739	0.0206432	0.894459	0.102328	0.804719
membrane bound O-acyl transferase MBOAT family protein	ZMO0446	ZMO0446	0	1	0	1	0	1	0.683627	0.323365
conserved hypothetical protein	ZMO0447	ZMO0447	-0.144022	0.953967	-0.153945	0.665785	-0.253244	0.713764	0.374341	0.496106
cell wall hydrolase SleB	ZMO0448	ZMO0448	-0.831565	0.359559	0.399546	0.574763	-1.21014	0.45862	0	1
conserved hypothetical protein	ZMO0449	ZMO0449	0.0919418	0.818445	-0.0449994	0.854146	0.109895	0.755367	-0.0803102	0.554293
pyrrolo-quinoline quinone	ZMO0452	ZMO0452	0.101384	0.390712	-0.0545864	0.165877	-0.0882282	0.618383	-0.0894597	0.62414
ribosome-associated GTPase EngA	engA	ZMO0453	-0.138364	0.195278	-0.0599944	0.270085	0.0458717	0.621172	-0.0227439	0.387957
formate--tetrahydrofolate ligase	fhs	ZMO0454	0.0729828	0.649971	0.0734062	0.341737	0.18255	0.320744	0.297434	0.149684
ferredoxin	ZMO0456	ZMO0456	0.028518	0.990691	-0.354162	0.849356	-0.387939	0.864141	-0.60345	0.850444
glutamate uptake regulatory protein	grp	ZMO0457	-0.221975	0.794254	0.290725	0.352668	0.232351	0.687386	0.258077	0.626502
lipoprotein-releasing system ATP-binding protein LolD	lolD	ZMO0458	-0.276028	0.317215	-0.0545902	0.715476	-0.0648346	0.854494	-0.175474	0.623634
lipoprotein releasing system transmembrane protein LolC/E family	lolC	ZMO0459	-0.224393	0.645105	-0.357993	0.137227	-0.0283991	0.952231	-0.185661	0.455949
proline--tRNA ligase	proS	ZMO0460	0.0575314	0.908522	-0.081749	0.198491	-0.0578384	0.57833	-0.0440884	0.70863
CTP synthase	pyrG	ZMO0462	0.0273844	0.960639	-0.0748889	0.315355	-0.00276438	0.991636	0.0407174	0.510017
triosephosphate isomerase TpiA	tpiA	ZMO0465	0.0708637	0.777024	-0.199004	0.289578	-0.158003	0.432433	-0.133741	0.680609
PpiC-type peptidyl-prolyl cis-trans isomerase	ZMO0467	ZMO0467	-0.135034	0.48761	-0.17465	0.0692941	-0.121652	0.566228	-0.15539	0.15168
anthranilate synthase component I	trpE	ZMO0468	-0.0628726	0.82026	-0.110631	0.330694	-0.181204	0.390237	-0.163713	0.53762
hypothetical protein	ZMO0469	ZMO0469	-0.0337378	0.981293	0.164895	0.814236	0.562317	0.292228	0.13386	0.77287
LysR family transcriptional regulator	ZMO0471	ZMO0471	0.222275	0.777501	0.260597	0.111121	0.179316	0.556068	0.0867424	0.443181
rpsU-divergently transcribed protein	ZMO0472	ZMO0472	-0.010114	0.998951	0.353006	0.130855	0.0283845	0.962286	0.400323	0.31657
6,7-dimethyl-8-ribityllumazine synthase	ribH	ZMO0473	-0.425234	0.550154	0.288877	0.185086	0.160795	0.371782	0.130244	0.602222
3,4-dihydroxy-2-butanone 4-phosphate synthase	ribB	ZMO0474	0.0299466	0.951884	0.00804647	0.980948	0.172646	0.520082	0.100415	0.555713
riboflavin synthase alpha subunit	ribC	ZMO0475	0.131785	0.601903	0.0992171	0.208967	0.187922	0.041	0.420465	0.138915
riboflavin biosynthesis protein RibD	ribD	ZMO0476	-0.0475388	0.897	0.112643	0.0794899	0.0306524	0.757912	0.123933	0.445165
conserved hypothetical protein	ZMO0477	ZMO0477	-0.237389	0.867273	-0.12686	0.904369	-0.483283	0.43297	0.513862	0.478997
winged helix family two component transcriptional regulator	ZMO0478	ZMO0478	-0.354982	0.185966	-0.0662212	0.200214	0.0339038	0.44131	0.0586249	0.63233
peptidoglycan-binding LysM	ZMO0479	ZMO0479	-0.425282	0.154286	-0.260978	0.116362	-0.316488	0.285429	-0.426946	0.247984
histidine kinase	ZMO0480	ZMO0480	-0.175278	0.440173	-0.153299	0.214311	-0.265362	0.276012	-0.0550912	0.86206
hypothetical protein	ZMO0481	ZMO0481	0.162891	0.908657	-0.0261866	0.987739	-0.398966	0.473893	1.0333	0.543064
fructose-1,6-bisphosphatase class II	glpX	ZMO0482	-0.213017	0.363869	-0.0663058	0.550538	0.0424976	0.891826	-0.133254	0.567183
homoserine dehydrogenase	hom	ZMO0483	0.160414	0.541477	0.142399	0.134819	0.124202	0.292462	0.134225	0.245695
MgtC/SapB transporter	ZMO0484	ZMO0484	0.255196	0.618175	0.492517	0.116944	0.221309	0.440303	0.27239	0.466231
acyl-CoA dehydrogenase domain protein	ZMO0485	ZMO0485	0.0835698	0.538041	0.11897	0.341986	0.150913	0.655935	0.210965	0.262172
conserved hypothetical protein	ZMO0486	ZMO0486	0.13502	0.6731	0.079593	0.619669	-0.0895456	0.556548	0.0328681	0.88471
HpcH/HpaI aldolase	ZMO0487	ZMO0487	0.176416	0.506728	-0.0401675	0.661606	-0.104695	0.321139	-0.0890967	0.552484
hypothetical protein	ZMO0488	ZMO0488	0.0417474	0.931056	0.0262998	0.904639	-0.0285257	0.912456	-0.0835012	0.445906
oligopeptidase B PtrB	ptrB	ZMO0490	0.06416	0.87302	0.0102514	0.936346	-0.120596	0.226908	-0.0998777	0.486587
Xaa-Pro aminopeptidase PepP	pepP	ZMO0491	-0.159445	0.541885	-0.1435	0.144593	-0.193246	0.292097	-0.243916	0.351622
nitrogen regulatory protein PII	glnB	ZMO0492	-0.25853	0.03	-0.227188	0.118345	-0.19222	0.232211	-0.315981	0.269507
type I glutamine synthetase	glnA	ZMO0493	-0.0230611	0.950678	-0.0421257	0.635524	0.0685272	0.78553	0.0417786	0.862046
Bcr/CflA subfamily drug resistance transporter	ZMO0494	ZMO0494	-0.57331	0.616198	-0.0544872	0.94051	0.123142	0.826956	-0.00563558	0.992686
TamB/DUF490 domain-containing protein	ZMO0495	ZMO0495	-0.121324	0.736976	-0.163809	0.292176	-0.00465266	0.991254	-0.177328	0.357608
outer membrane protein assembly factor	ZMO0496	ZMO0496	-0.851038	0.492591	-1.00242	0.424127	-0.288321	0.875432	0.814309	0.857759
phosphoglycolate phosphatase	ZMO0497	ZMO0497	-0.260718	0.637636	-0.0132955	0.894177	0.0576458	0.845938	0.0662842	0.740769
bifunctional N-acetylglucosamine-1-phosphateuridyltransferase/glucosamine-1-phosphate acetyltransferase	glmU	ZMO0498	0.25292	0.409391	0.14341	0.0961121	0.122481	0.212848	0.0476023	0.689933
1A family penicillin-binding protein	pbpF	ZMO0499	-0.0545311	0.904135	-0.0098966	0.938339	0.0771389	0.767843	-0.0856005	0.404255
conserved hypothetical protein	ZMO0500	ZMO0500	-0.268312	0.648363	0.184853	0.497764	-0.144198	0.645486	-0.103556	0.760585
conserved hypothetical protein	ZMO0502	ZMO0502	-0.184722	0.583405	0.0717201	0.936996	0.303947	0.633511	0.120489	0.958416
glycosyl transferase family 2	ZMO0503	ZMO0503	-0.117062	0.677189	-0.00625547	0.980903	-0.188961	0.330558	-0.198808	0.396606
pseudouridine synthase	rluC	ZMO0505	-0.190903	0.646654	-0.353315	0.147742	-0.16409	0.59939	-0.216567	0.396769
peptide chain release factor 2	prfB	ZMO0506	0.258155	0.892715	0	1	0	1	0.0683301	0.978985
GAF domain-containing protein	ZMO0507	ZMO0507	0.2434	0.641088	-0.113499	0.315642	0.00321833	0.993883	0.0549494	0.841089
GCN5-related N-acetyltransferase	ZMO0508	ZMO0508	-0.345959	0.440204	-0.8294	0.144228	-0.630604	0.360736	-0.584647	0.342064
hypothetical protein	ZMO0509	ZMO0509	0.652721	0.358205	0.0571766	0.794189	-0.0668901	0.894117	0.164382	0.809484
dihydrolipoyllysine-residue acetyltransferase	pdhC	ZMO0510	-0.0155493	0.98263	0.109361	0.200246	0.0859324	0.758892	0.0219282	0.863015
thioesterase superfamily protein	ZMO0511	ZMO0511	-0.0117238	0.987872	0.374397	0.0251034	0.117585	0.752959	0.105017	0.651463
dihydrolipoamide dehydrogenase	lpd	ZMO0512	0.2037	0.535218	0.0375665	0.698676	0.126017	0.459863	0.0378342	0.830976
putative type 2 phosphatidic acid phosphatase	ZMO0513	ZMO0513	-0.0593917	0.974382	-0.104531	0.574515	-0.122366	0.516287	-0.214663	0.254268
ribosomal protein S7	rpsG	ZMO0514	-0.00186157	0.996196	-0.047994	0.653253	0.0746638	0.624042	0.11175	0.395518
translation elongation factor G	ZMO0515	ZMO0515	-0.0837072	0.742965	-0.104989	0.243508	-0.0685221	0.748142	0.0201861	0.884735
translation elongation factor Tu	ZMO0516	ZMO0516	-0.0368106	0.854842	0.0626564	0.230716	0.11746	0.468095	0.00770315	0.978384
ribosomal protein L3	rplC	ZMO0517	0.0986087	0.743238	0.022892	0.814444	0.141721	0.272704	0.0692291	0.633442
ribosomal protein L4	rplD	ZMO0518	0.0992889	0.819774	0.107241	0.0293521	0.161275	0.275094	0.0641556	0.375671
ribosomal protein L23	rplW	ZMO0519	0.209557	0.596879	0.0714302	0.633683	0.110783	0.364652	-0.000691732	0.996753
ribosomal protein L2	rplB	ZMO0520	0.013546	0.985509	0.00898234	0.952154	0.140617	0.450563	0.0207303	0.942713
ribosomal protein L22	rplV	ZMO0521	0.156801	0.617976	0.0177358	0.801555	0.0473849	0.760216	0.00590897	0.979466
ribosomal protein S3	rpsC	ZMO0522	0.0968933	0.69223	0.0747592	0.225682	0.149034	0.438592	0.0198021	0.933871
ribosomal protein L16	rplP	ZMO0523	-0.0380071	0.938564	0.0275103	0.804313	0.102729	0.482296	-0.00229645	0.991886
ribosomal protein L29	rpmC	ZMO0524	0.0584564	0.895818	-0.253507	0.696202	0.0780671	0.874319	-0.167714	0.880968
ribosomal protein S17	rpsQ	ZMO0525	0.2459	0.680309	0.152332	0.512969	0.0261701	0.665306	0.135607	0.493805
ribosomal protein L14	rplN	ZMO0526	-0.0721512	0.776874	0.0295067	0.76161	0.0891457	0.62335	0.074098	0.616344
ribosomal protein L24	rplX	ZMO0527	0.284533	0.650865	0.0084788	0.938035	0.128445	0.460357	0.0668805	0.75259
ribosomal protein L5	rplE	ZMO0528	-0.175992	0.393082	0.023763	0.659686	0.051604	0.743108	0.0506833	0.856554
ribosomal protein S14	rpsN	ZMO0529	0.0226879	0.996257	0.190968	0.196285	0.17287	0.687612	-0.207214	0.73639
ribosomal protein S8	rpsH	ZMO0530	0.0683161	0.747088	0.0915438	0.133972	0.124793	0.285452	0.115317	0.261948
ribosomal protein L6 signature 1	rplF	ZMO0531	0.0615425	0.867489	-0.0634384	0.466673	0.0238571	0.914371	0.0316251	0.855465
ribosomal protein L18	rplR	ZMO0532	0.0437546	0.947225	0.0819028	0.275054	0.137821	0.291925	0.180167	0.338656
ribosomal protein S5	rpsE	ZMO0533	0.167444	0.585687	0.123517	0.0799722	0.130353	0.416532	0.0570844	0.77467
ribosomal protein L30	rpmD	ZMO0534	0.125483	0.818159	0.0955976	0.552245	0.120502	0.689841	-0.051424	0.837754
ribosomal protein L15	rplO	ZMO0536	0.124054	0.820494	0.0575829	0.654528	0.0341104	0.802436	0.0522181	0.697453
preprotein translocase SecY subunit	secY	ZMO0537	-0.251902	0.249751	0.0490443	0.723501	-0.169863	0.389839	-0.121238	0.489564
adenylate kinase	adk	ZMO0538	0.165953	0.818221	0.0667801	0.780419	-0.0741482	0.605426	-0.150744	0.502082
ribosomal protein S13	rpsM	ZMO0539	0.0363859	0.82202	0.0723928	0.286166	0.172407	0.19894	0.0497843	0.681607
ribosomal protein S11	rpsK	ZMO0540	-0.0363884	0.952089	0.0502357	0.802404	0.16792	0.337072	0.0375926	0.862711
DNA-directed RNA polymerase alpha subunit	rpoA	ZMO0541	-0.0370331	0.795353	-0.153572	0.190329	-0.0671539	0.687195	-0.0293541	0.808613
ribosomal protein L17	rplQ	ZMO0542	-0.0602455	0.859803	0.0776622	0.556608	0.0684751	0.623219	0.0924988	0.42527
aconitate hydratase	acnA	ZMO0543	0.29236	0.180453	0.168204	0.198129	0.216721	0.226909	0.16966	0.490258
isocitrate dehydrogenase NADP-dependent	citC	ZMO0544	0.262643	0.12254	0.258224	0.0268197	0.22082	0.126789	0.186305	0.457389
bifunctional N-(5-phosphoribosyl)anthranilate isomerase/indole-3-glycerolphosphate synthase	trpC	ZMO0545	0.0736923	0.865745	-0.152641	0.36925	0.0589218	0.877474	0.149694	0.490661
sulphate transporter	sulP	ZMO0546	-0.0707467	0.911348	-0.0840791	0.813968	0.200617	0.605229	-0.089393	0.757765
voltage-gated chloride channel protein	ZMO0547	ZMO0547	0.641845	0.431083	0.0911605	0.648254	0.0559082	0.882457	-0.0224158	0.952118
signal transduction histidine kinase	ZMO0548	ZMO0548	-0.159087	0.758943	-0.187176	0.311141	-0.145477	0.447282	-0.0813662	0.683157
polyribonucleotide nucleotidyltransferase	pnp	ZMO0549	0.0660337	0.859409	0.0533498	0.425273	0.1076	0.329824	0.129384	0.394177
ribosomal protein S15	rpsO	ZMO0550	0.000261943	1	0.0306371	0.938183	0.067035	0.874766	0.0431512	0.942111
tRNA pseudouridine synthase B TruB	truB	ZMO0551	-0.209749	0.442903	-0.375331	0.0702901	-0.294563	0.191481	0.00933647	0.985638
thymidine kinase	tdk	ZMO0552	0.304373	0.58428	-0.121065	0.735192	0.0655041	0.878144	0.0836805	0.705704
ribosome-binding factor A	rbfA	ZMO0553	-0.0584462	0.935248	-0.0814546	0.747525	-0.0311006	0.943225	0.010615	0.979979
translation initiation factor IF-2	infB	ZMO0554	0.0442886	0.907558	0.0422592	0.422137	0.122498	0.376716	0.123109	0.393064
DUF448 domain-containing protein	ZMO0555	ZMO0555	-0.130885	0.768999	0.0583051	0.644505	0.243982	0.23738	0.188699	0.156636
transcription termination protein NusA	nusA	ZMO0556	-0.0364151	0.87691	-0.0593834	0.217543	0.00428645	0.982817	-0.0779762	0.666269
DUF150/RimP N-terminal domain-containing protein	ZMO0557	ZMO0557	-0.124434	0.489543	-0.0955238	0.315193	0.0723031	0.758294	0.101425	0.439083
glucose sorbosone dehydrogenase	ZMO0558	ZMO0558	0.0818672	0.561692	-0.00182215	0.990494	-0.0506954	0.819083	-0.113133	0.267575
AAA domain-containing protein	ZMO0559	ZMO0559	0.06206	0.812148	0.00951576	0.93983	0.112328	0.455945	-0.0879822	0.257557
TonB-dependent receptor plug domain	ZMO0561	ZMO0561	-3.93273	0.0972203	-0.691648	0.8019	-2.1246	0.317192	-1.70225	0.491474
histidinol-phosphate aminotransferase HisC	hisC4	ZMO0562	-1.51452	0.036	-1.1282	0.123816	-0.976051	0.264787	-0.590957	0.150286
chorismate mutase	ZMO0563	ZMO0563	-0.187147	0.69237	-0.101746	0.673259	-0.21486	0.384474	-0.254929	0.510747
farnesyl diphosphate synthetase	idsA	ZMO0564	-0.143297	0.352113	-0.101922	0.574785	-0.144716	0.425719	0.14322	0.540179
ATP-dependent helicase HrpB	hrpB	ZMO0565	-0.107878	0.550303	-0.0209338	0.763022	-0.0527611	0.801867	0.0418682	0.775148
major facilitator superfamily transporter	ZMO0566	ZMO0566	0.51634	0.821631	1.35116	0.474339	0.173561	0.958594	0.719397	0.855528
succinyl-CoA synthetase alpha subunit	sucD	ZMO0567	-0.170974	0.584807	-0.103097	0.468621	0.0171254	0.958189	0.094368	0.513466
succinate dehydrogenase (SQR) hydrophobic subunit	sdhD	ZMO0568	-0.298349	0.834151	-0.525795	0.0846557	0.319331	0.809413	-0.14153	0.794805
succinate dehydrogenase (SQR) cytochrome b subunit	sdhC	ZMO0569	0.151054	0.931342	-0.167686	0.720525	0.0714601	0.894744	-0.274791	0.550032
ribosomal L11 methyltransferase	prmA	ZMO0570	-0.0100835	0.982461	-0.0748469	0.35485	0.0456397	0.756664	-0.17771	0.342419
MetI-like ABC transporter transmembrane protein	ZMO0571	ZMO0571	0.0135778	0.989574	-0.340899	0.0899612	-0.339017	0.355807	-0.158834	0.733947
ABC transporter ATPase component	ZMO0572	ZMO0572	-0.224578	0.194848	-0.221261	0.181944	-0.200857	0.518119	-0.275371	0.342447
glutaredoxin 2 GrxB family	grxB2	ZMO0573	-0.685117	0.0378947	-0.146981	0.154451	-0.00296148	0.983212	-0.0828374	0.779433
UvrD/REP helicase	ZMO0574	ZMO0574	0.145112	0.163469	0.198017	0.164417	0.281593	0.235493	0.198184	0.338071
RsmD family protein	rsmD	ZMO0575	-0.00805283	0.988464	-0.120173	0.256653	-0.0473843	0.646072	0.137643	0.404858
pseudouridine synthase	ZMO0576	ZMO0576	0.161336	0.821605	-0.05502	0.368532	-0.0432345	0.683479	0.0334848	0.842203
sodium:dicarboxylate symporter	ZMO0578	ZMO0578	0.100923	0.782126	0.148735	0.55988	0.0205421	0.965311	-0.090793	0.814593
major facilitator superfamily transporter	ZMO0581	ZMO0581	0	1	0	1	-0.478615	0.669934	-0.431164	0.83455
bifunctional folylpolyglutamate synthase/dihydrofolate synthase FolC	folC	ZMO0582	-0.108731	0.328726	-0.0589447	0.314209	0.112366	0.62108	-0.0328655	0.789322
acetyl-CoA carboxylase beta subunit	accD	ZMO0583	-0.0604814	0.636296	-0.00919533	0.924123	0.0437361	0.691626	-0.032835	0.851046
tryptophan synthase alpha subunit	trpA	ZMO0584	0.183201	0.513537	0.159569	0.118265	0.122754	0.198935	0.00627391	0.986857
tryptophan synthase beta subunit	trpB	ZMO0585	0.160233	0.349836	0.177431	0.177649	0.0951856	0.434388	0.111038	0.753971
phosphoribosylanthranilate isomerase	trpF	ZMO0586	0.143717	0.791125	0.150079	0.168519	0.114995	0.31598	0.171118	0.440692
orotidine 5'-phosphate decarboxylase	pyrF	ZMO0587	-0.111136	0.806025	0.000967026	0.997938	-0.0518595	0.768925	0.176613	0.455304
conserved hypothetical protein	ZMO0588	ZMO0588	-0.793095	0.774275	0.0918795	0.919584	-0.230705	0.756504	-0.226016	0.85945
DNA repair protein RadA	radA	ZMO0589	0.179627	0.452867	0.200026	0.0985091	0.389531	0.129179	0.354573	0.163538
uncharacterized protein	ZMO0590	ZMO0590	-0.184308	0.950158	0	1	-0.546902	0.768126	0.188384	0.643987
NifU-like protein	ZMO0591	ZMO0591	-0.271467	0.900889	-0.418454	0.235576	-0.065431	0.889424	0.0936565	0.857255
3-dehydroquinate synthase	aroB	ZMO0593	-0.000747045	1	-0.00056839	0.981049	-0.104198	0.333082	0.146782	0.170824
shikimate kinase	aroK	ZMO0594	-0.104787	0.867818	0.0150337	0.938836	0.22031	0.474581	0.363716	0.367121
hypothetical protein	ZMO0595	ZMO0595	0	1	0.499449	0.672621	-0.0950546	0.80176	-0.397502	0.673674
conserved hypothetical protein	ZMO0597	ZMO0597	-0.206793	0.241481	-0.0998605	0.508065	-0.0461731	0.772136	-0.103241	0.354447
tyrosine recombinase XerD	xerD	ZMO0598	-0.623418	0.430286	-0.0199502	0.951883	-0.183831	0.443378	-0.129966	0.809195
acetyl-CoA carboxyltransferase alpha subunit	accA	ZMO0599	-0.0260849	0.930531	0.0702623	0.52129	-0.0398553	0.838042	0.0490532	0.794914
putative signal transduction histidine kinase	ZMO0601	ZMO0601	-0.130393	0.79214	-0.236545	0.544893	0.104523	0.839293	-0.0419464	0.864424
flagellar motor protein MotB	motB1	ZMO0602	0.153129	0.666201	0.0736154	0.694048	-0.0395743	0.85329	-0.118415	0.577829
flagellar motor protein MotA	motA1	ZMO0603	0.0692972	0.892144	0.172784	0.483225	-0.115929	0.801893	0.224342	0.536582
flagellin domain protein	flgL	ZMO0604	0.00824865	0.991923	-0.2271	0.46261	-0.0792421	0.855145	0.0232105	0.979475
flagellar hook-associated protein FlgK	flgK	ZMO0605	-0.117208	0.485742	-0.384965	0.132135	-0.216267	0.285494	-0.133436	0.420801
flagellar rod assembly protein/muramidase FlgJ	ZMO0606	ZMO0606	-0.206863	0.905226	-0.256938	0.840328	-0.594982	0.655221	0.932	0.331186
flagellar P-ring protein	flgI	ZMO0607	-0.275595	0.423862	-0.00444603	0.996793	-0.973884	0.320352	-0.172862	0.583611
flagellar L-ring protein	flgH	ZMO0608	0.117769	0.903913	-0.0744909	0.880807	-0.0792522	0.894187	0.178385	0.857398
flagellar basal-body rod protein FlgG	flgG	ZMO0609	-0.0257689	0.986175	0.205324	0.554062	0.729396	0.362106	1.48305	0.148615
flagellar basal-body rod protein FlgF	flgF	ZMO0610	0.0896683	0.986782	0.379901	0.356927	0.158441	0.826792	1.01594	0.144957
flagellar hook protein FlgE	flgE	ZMO0611	0.24557	0.541082	-0.254615	0.181013	0.173669	0.663996	0.40637	0.175705
flagellar hook capping protein	flgD	ZMO0612	0.260247	0.450049	-0.0157681	0.970069	0.324336	0.284771	0.711199	0.397884
flagellar basal-body rod protein FlgC	flgC	ZMO0613	0.121354	0.967596	0	1	0	1	-0.352735	0.701941
flagellar motor protein MotA	motA2	ZMO0616	0.169483	0.477105	-0.680566	0.205629	-0.283693	0.287268	0.166405	0.582701
flagellar motor protein MotB	motB2	ZMO0617	0.117758	0.90217	-0.178573	0.622006	0.105297	0.818649	0.212889	0.663203
flagella basal body P-ring formation protein FlgA	flgA	ZMO0619	0.14964	0.899259	-0.0322285	0.912386	-0.159443	0.766419	-1.07591	0.148125
flagellar biosynthesis anti-sigma factor FlgM	flgM	ZMO0621	0.103955	0.785693	0.0775375	0.352675	0.0432625	0.842751	0.0650056	0.6639
flagellar biosynthesis protein FlhA	flhA	ZMO0624	0.170486	0.608819	-0.29973	0.103031	-0.0831153	0.871521	-0.233596	0.579251
MinD-like ATPase FlhG	flhG	ZMO0625	0.0590172	0.743698	0.201253	0.355147	0.253855	0.364098	0.295674	0.456535
RNA polymerase sigma 28 subunit FliA/WhiG	fliA	ZMO0626	0.252988	0.637	0.150838	0.170793	0.325796	0.265003	0.361388	0.291673
GT2 family glycosyltransferase	ZMO0627	ZMO0627	0.23074	0.543005	0.203578	0.22525	0.00953801	0.974274	0.153416	0.524286
glycosyl transferase family 2	ZMO0628	ZMO0628	0.195119	0.767851	-0.0114504	0.964765	0.164461	0.603975	0.0171248	0.960882
flagellin domain-containing protein	fliC	ZMO0629	0.22376	0.633034	0.142352	0.440318	-0.00590515	0.990055	0.56632	0.155365
flagellar M-ring protein FliF	fliF	ZMO0634	-0.57749	0.514303	-0.176309	0.748474	-0.927333	0.475137	-0.927164	0.560364
flagellar motor switch protein FliG	fliG	ZMO0635	0.128019	0.896799	0.218068	0.424887	0.446117	0.360573	0.174857	0.426953
negative regulator of FliI ATPase	fliH	ZMO0636	0.3062	0.637872	-0.0910193	0.924238	0.609093	0.342391	0.582675	0.583151
flagellum-specific ATP synthase FliI	fliI	ZMO0637	0.245193	0.635094	-0.105726	0.64444	-0.112234	0.820081	0.246054	0.156892
flagellar basal body-associated protein FliL	fliL	ZMO0642	-0.564365	0.778614	0.287233	0.761815	0.116076	0.893758	0.234402	0.759126
flagellar motor switch protein FliM	fliM	ZMO0643	-0.250591	0.136333	-0.191884	0.126246	-0.0566546	0.723439	-0.0641804	0.622341
flagellar motor switch protein FliN	fliN	ZMO0644	-0.13367	0.889803	-0.175956	0.590293	-0.285976	0.436086	0.0227133	0.933605
flagellar biosynthesis protein FliP	fliP	ZMO0647	-0.279875	0.691321	-0.374034	0.218637	0.255139	0.756719	-0.0564944	0.924881
flagellar biosynthesis protein FlhB	flhB	ZMO0650	-1.30614	0.675649	-0.155594	0.93037	0.049462	0.883797	0.0435956	0.930394
flagellar hook protein FliD	fliD	ZMO0651	-0.309462	0.63068	-0.323462	0.0282069	-0.0555147	0.66958	0.0121053	0.967818
flagellar biosynthesis protein FliS	fliS	ZMO0652	-0.00780233	0.996462	0.00471179	0.993313	0.122885	0.713972	-0.172444	0.800772
AI-2E family transporter	ZMO0653	ZMO0653	-0.266862	0.615144	-0.00554339	0.988578	-0.150773	0.66853	-0.0423616	0.940777
polysaccharide deacetylase	ZMO0654	ZMO0654	-0.162519	0.274484	-0.11784	0.0706357	-0.178259	0.440537	-0.216537	0.289495
adenosine/AMP deaminase	add1	ZMO0655	-0.29784	0.190655	-0.400139	0.0666129	-0.311389	0.14052	-0.355036	0.445288
phosphoribosyltransferase	gpt	ZMO0656	-0.138083	0.614271	-0.0600135	0.636008	0.183634	0.440941	0.206575	0.563245
arginine/ornithine N-succinyltransferase beta subunit AstA	astA	ZMO0657	-0.526227	0.0828235	-0.377053	0.028878	-0.514268	0.180529	-0.401696	0.157088
peptidase M20	ZMO0658	ZMO0658	-0.217785	0.618653	-0.0588837	0.377543	0.0430762	0.882964	-0.141563	0.652407
HAD (haloacid dehalogenase)-superfamily subfamily IB hydrolase	ZMO0659	ZMO0659	0.20245	0.694319	-0.264514	0.21414	-0.156923	0.630671	0.151972	0.708799
chaperone protein DnaK	dnaK	ZMO0660	0.21637	0.365039	0.246446	0.0420741	0.171602	0.265299	0.0888939	0.570129
chaperone protein DnaJ	dnaJ	ZMO0661	0.242242	0.360137	0.0220273	0.936111	0.0355206	0.891092	0.0145378	0.95954
adenylosuccinate lyase	purB	ZMO0662	0.201506	0.359714	0.209045	0.110712	0.301799	0.198761	0.277031	0.227722
DNA repair protein RadC	radC	ZMO0663	0.429044	0.490065	0.379501	0.43252	0.715263	0.084	0.336001	0.183742
conserved hypothetical protein	ZMO0664	ZMO0664	-0.253804	0.104267	-0.327876	0	-0.272436	0.330376	-0.208588	0.278918
YnbE family lipoprotein	ZMO0665	ZMO0665	0	1	0	1	0.00368627	0.993808	-1.29998	0.1552
conserved hypothetical protein	ZMO0666	ZMO0666	-0.216317	0.321217	0.093874	0.854973	-0.108721	0.652649	-0.282399	0.583463
ATP synthase F0F1 A subunit	atpB	ZMO0667	-0.263306	0.79294	0.263566	0.47462	0.323926	0.221133	0.277987	0.595363
ATP synthase F0F1 C subunit	atpE	ZMO0668	0.315917	0.534677	0.328529	0.0391724	0.163912	0.468305	0.269965	0.395427
ATP synthase F0F1 B/B' subunit	atpG2	ZMO0669	0.257097	0.423883	0.207764	0.101586	0.126164	0.622541	-0.0153726	0.967385
ATP synthase F0F1 B/B' subunit	atpF	ZMO0671	0.158792	0.81903	0.171661	0.165615	0.0575358	0.801585	0.0585658	0.67807
excinuclease ABC C subunit	uvrC	ZMO0672	0.353933	0.777971	-0.0960414	0.836009	0.756935	0.29212	0.559716	0.448516
hypothetical protein	ZMO0674	ZMO0674	0.0926266	0.952295	0.216961	0.170998	-0.133956	0.463508	-0.246108	0.568468
LysR family transcriptional regulator	ZMO0675	ZMO0675	-0.0548999	0.889958	0.00130971	0.997085	0.075524	0.543622	0.135185	0.572722
cystathionine gamma-synthase	ZMO0676	ZMO0676	0.223066	0.432775	0.0414569	0.698989	0.00762049	0.960254	-0.0022138	0.993404
3-isopropylmalate dehydrogenase	leuB	ZMO0677	0.320934	0.192459	0.275272	0.0263111	0.183388	0.204925	0.157377	0.550517
nitroreductase	tdsD	ZMO0678	0.00203005	1	0.146782	0.727367	0.0312748	0.951018	0.460332	0.287502
CRISPR-associated protein Cas1	ZMO0680	ZMO0680	-0.0265592	0.822306	-0.0816873	0.780254	0.0656904	0.894006	-0.0572599	0.685974
CRISPR-associated helicase Cas3 family	ZMO0681	ZMO0681	0.0772966	0.632744	0.0423094	0.819001	0.0302086	0.826062	0.00812276	0.945489
CRISPR-associated protein Csy1 family	ZMO0682	ZMO0682	0.183492	0.459222	0.0500215	0.31304	0.0159613	0.893302	-0.064937	0.511186
CRISPR-associated protein Csy2 family	ZMO0683	ZMO0683	-0.156063	0.629242	0.166005	0.181505	0.190938	0.22722	0.119016	0.557859
CRISPR-associated protein Csy3 family	ZMO0684	ZMO0684	0.166277	0.441235	-0.0186342	0.750659	0.0534026	0.626745	-0.050045	0.623146
CRISPR-associated protein Csy4 family	ZMO0685	ZMO0685	0.474646	0.398267	0.105306	0.308819	-0.164709	0.532695	0.172944	0.323652
signal transduction protein	ZMO0686	ZMO0686	-0.135314	0.860063	-0.0717551	0.668858	-0.227065	0.430489	-0.00484594	0.990529
acetolactate synthase large subunit	budB	ZMO0687	0.082688	0.797234	0.0819499	0.482286	0.203688	0.316738	0.0877469	0.712896
putative auxin efflux carrier	ZMO0688	ZMO0688	-1.04723	0.526304	0.397704	0.758274	-0.0768147	0.952471	0.156995	0.942939
glucose-fructose oxidoreductase	gfo	ZMO0689	0.361935	0.188865	0.273557	0.110155	0.239897	0.333477	0.256728	0.397724
tRNA (uracil-5-)-methyltransferase Gid	gid	ZMO0691	-0.129017	0.303779	-0.150548	0.320157	-0.0589663	0.633877	0.117186	0.347024
DNA gyrase A subunit	gyrA	ZMO0692	0.0973409	0.720565	-0.00568962	0.939146	0.100639	0.344314	0.133249	0.152762
OsmC family protein	ZMO0693	ZMO0693	0.525815	0.304179	0.288594	0.155178	0.345005	0.390337	-0.0291971	0.973572
conserved hypothetical protein	ZMO0694	ZMO0694	0.277213	0.280753	0.400079	0.0263871	0.121387	0.382354	-0.366782	0.332899
conserved hypothetical protein	ZMO0695	ZMO0695	-0.259363	0.398883	-0.231108	0.146823	-0.243572	0.182535	-0.157492	0.1422
hypothetical protein	ZMO0699	ZMO0699	-0.0698083	0.921469	-0.574465	0.757492	-0.0175317	0.98618	-0.543999	0.20448
peptidase S9 prolyl oligopeptidase active site domain protein	ZMO0703	ZMO0703	0.14449	0.644414	0.134932	0.483237	0.0283305	0.816309	-0.0115827	0.978686
AMP-dependent synthetase and ligase	ZMO0704	ZMO0704	0.055659	0.780227	0.00387192	0.984458	0.146384	0.496107	0.130935	0.522337
putative regulatory protein RecX	ZMO0705	ZMO0705	0.197532	0.860256	0.031311	0.951997	0.498799	0.440442	0.189107	0.490622
endonuclease III	nth	ZMO0706	-0.180737	0.603669	0.0203985	0.850614	-0.00693448	0.964707	-0.0551262	0.761756
dihydrodipicolinate reductase	dapB	ZMO0707	-0.170642	0.614909	0.0847918	0.383802	0.0255795	0.908324	-0.0506706	0.779515
phosphoribosylglycinamide formyltransferase	purN	ZMO0708	0.0262655	0.897218	-0.101012	0.622704	0.117946	0.621547	0.0870126	0.671062
phosphoribosylformylglycinamidine cyclo-ligase	purM	ZMO0709	0.0994867	0.631337	-0.0450153	0.395186	-0.0607961	0.75723	-0.113874	0.705996
conserved hypothetical protein	ZMO0710	ZMO0710	-0.111643	0.466244	-0.196767	0.0531624	-0.0789496	0.623557	-0.0721378	0.518344
ATPase involved in DNA replication initiation	ZMO0711	ZMO0711	0.0906086	0.778194	-0.0620524	0.556737	0.19214	0.275939	0.14429	0.681663
polyphosphate kinase	ppk	ZMO0712	0.147174	0.609623	0.121277	0.230294	0.0613168	0.632564	-0.10755	0.456393
exopolyphosphatase	ppx	ZMO0713	-0.0194778	0.946674	-0.0980695	0.424436	-0.117388	0.5576	-0.0859127	0.648077
ribonuclease D	rnd2	ZMO0714	-0.0637194	0.861012	-0.0424957	0.574766	0.144817	0.233015	0.0210896	0.908687
aspartate--tRNA(Asp/Asn) ligase	aspS	ZMO0715	0.0471992	0.819455	0.0532773	0.274078	0.134099	0.319579	0.211437	0.199513
DUF344/polyphosphate kinase 2 domain-containing protein	ZMO0716	ZMO0716	0.0157789	0.836297	0.110203	0.309062	-0.0159314	0.958029	-0.054177	0.70987
transcription elongation factor GreB	greB	ZMO0718	0.131414	0.659557	-0.0199623	0.940389	-0.132193	0.333515	-0.0267913	0.911199
lytic transglycosylase catalytic	ZMO0719	ZMO0719	-0.00996335	0.982087	0.0460148	0.634792	0.113925	0.285983	0.0485083	0.535836
dihydrodipicolinate synthase	dapA1	ZMO0720	0.171434	0.274867	0.157171	0.0255625	0.110381	0.234553	0.109703	0.652933
SsrA-binding protein	smpB	ZMO0721	-0.00210571	0.998329	0.101222	0.244195	0.177558	0.429646	0.00253932	0.987571
endothelin-converting enzyme 1	ZMO0722	ZMO0722	-0.337558	0.218511	-0.370758	0.041561	-0.390251	0.193422	-0.337365	0.363931
transcription termination/antitermination factor NusG	nusG	ZMO0724	0.121648	0.694273	0.00993792	0.938481	0.0377998	0.814699	0.0395508	0.831637
ribosomal protein L11	rplK	ZMO0725	-0.115772	0.583849	-0.0615514	0.304065	0.139572	0.424181	0.000408173	0.998905
ribosomal protein L1	rplA	ZMO0726	0.137774	0.667704	0.0467339	0.688874	0.122523	0.486712	0.0643196	0.543698
ribosomal protein L10	rplJ	ZMO0727	-0.162754	0.640936	0.0369225	0.742315	0.0244916	0.83856	0.11375	0.569813
ribosomal protein L7/L12	rplL	ZMO0728	0.105838	0.693144	0.125209	0.133494	0.089625	0.332987	0.067393	0.49461
DNA-directed RNA polymerase beta subunit	rpoB	ZMO0731	-0.00660451	0.989135	-0.0957069	0.166005	-0.0420672	0.798509	-0.0362981	0.700742
DNA-directed RNA polymerase beta' subunit	rpoC	ZMO0732	-0.00218582	0.99823	-0.0761477	0.181928	-0.0237503	0.894993	-0.0524368	0.542925
3'(2'),5'-bisphosphate nucleotidase CysQ	cysQ	ZMO0734	-0.0140171	0.952454	0.0399653	0.483964	-0.0143356	0.897645	-0.0177066	0.952687
acetyl-CoA carboxylase complex biotin carboxylase subunit	accC	ZMO0735	-0.107843	0.45771	-0.136588	0.0821899	-0.010114	0.965799	-0.0490557	0.454234
acetyl-CoA carboxylase complex biotin carboxyl carrier protein	accB	ZMO0736	-0.0144882	0.986674	0.236495	0.25353	0.183453	0.668127	0.478244	0.710969
type II 3-dehydroquinate dehydratase	aroD	ZMO0737	-0.0966314	0.960146	0.745982	0.220815	0.213188	0.829174	0.339743	0.712762
thiazole biosynthesis protein ThiG	thiG	ZMO0738	0.0271244	0.440677	-0.108308	0.424753	-0.0286427	0.841719	-0.0380561	0.862354
antibiotic biosynthesis monooxygenase	ZMO0739	ZMO0739	-0.0889053	0.952757	0.247259	0.124575	0.0442238	0.852542	0.176324	0.395531
general stress protein CsbD	csbD	ZMO0740	-0.0211004	0.786854	-0.0176519	0.644901	-0.0918083	0.443968	-0.0867691	0.708984
peptide chain release factor 3	prfC	ZMO0743	0.164464	0.554912	0.0943521	0.253185	0.237287	0.1015	0.204824	0.206
conserved hypothetical protein	ZMO0744	ZMO0744	0	1	0.661453	0.755523	0.229987	0.875666	0	1
DUF1058/SH3 domain-containing protein	ZMO0746	ZMO0746	0.248597	0.69283	0.0427049	0.919722	0.0339069	0.87828	0.147358	0.743723
conserved hypothetical protein	ZMO0747	ZMO0747	1.12616	0.429666	0.584776	0.222174	0.81121	0.493227	-0.343136	0.631026
cysteine synthase	cysK	ZMO0748	-0.0182616	0.953083	0.0933488	0.308933	-0.0274251	0.881948	-0.0241534	0.920744
RNA polymerase sigma 32 subunit RpoH	rpoH	ZMO0749	0.0978394	0.747364	0.0210997	0.905066	-0.0860945	0.361782	-0.0438302	0.876577
23S rRNA pseudouridine synthase D RluD	rluD	ZMO0750	-0.198016	0.83296	-0.107487	0.669277	0.0291786	0.829967	-0.0429961	0.799882
Mov34/MPN/PAD-1 family protein	ZMO0751	ZMO0751	-1.50462	0.51769	-2.16047	0.318428	-0.523937	0.819527	2.21646	0.440523
histidine phosphotransferase	ZMO0752	ZMO0752	-0.00578117	0.996218	-0.0139618	0.937244	-0.225064	0.286424	0.299908	0.478362
glutaredoxin 3	ZMO0753	ZMO0753	0.16102	0.647224	0.164039	0.574171	-0.0512206	0.889485	-0.159498	0.231414
sterol-binding domain protein	ZMO0754	ZMO0754	0.103737	0.803602	0.0486755	0.764977	0.131062	0.690037	-0.141397	0.468267
TPR repeat-containing protein	ZMO0756	ZMO0756	-0.0330124	0.898382	-0.14788	0.119203	-0.118318	0.441647	-0.0582498	0.802278
TPR repeat-containing protein	ZMO0757	ZMO0757	-0.0601425	0.651717	-0.159965	0.118371	-0.105087	0.305354	-0.119846	0.461132
isochorismatase hydrolase	dhbB	ZMO0758	0.369734	0.516047	-0.161229	0.490746	-0.431726	0.291281	-0.0743262	0.776108
hydroxyacylglutathione hydrolase	ZMO0759	ZMO0759	0.157562	0.639478	-0.044747	0.759557	-0.124222	0.203761	-0.135907	0.523907
glyoxalase/bleomycin resistance protein/dioxygenase	gloA2	ZMO0760	0.240028	0.59069	0.0990537	0.364073	-0.000858307	0.995243	-0.0201626	0.976257
tetratricopeptide domain protein	ZMO0763	ZMO0763	-0.0960808	0.551261	-0.0549895	0.4282	0.0973326	0.428215	0.107644	0.772112
alpha/beta hydrolase fold protein	ZMO0764	ZMO0764	0.240622	0.321254	0.0819511	0.18206	-0.0918013	0.358892	0.0135873	0.958397
threonyl-tRNA synthetase	thrS	ZMO0765	0.0730158	0.780375	0.0586421	0.538121	0.0534376	0.757269	0.156578	0.24135
bifunctional uridylyltransferase/uridylyl-removing protein GlnD	glnD	ZMO0766	-0.155058	0.155529	-0.153573	0.118316	-0.0562414	0.179237	-0.107457	0.642139
hypothetical protein	ZMO0767	ZMO0767	-0.250488	0.692729	-0.775683	0.106895	-0.750224	0.100229	-0.669414	0.0690909
tRNA 2-thiouridine(34) synthase MnmA	mnmA	ZMO0769	-0.0356178	0.897163	-0.105968	0.293789	0.0103283	0.953003	0.00892639	0.951123
magnesium transporter	mgtE	ZMO0770	-0.0086511	0.991493	-0.201354	0.236062	-0.0211493	0.926663	0.0427119	0.820825
peptidyl-prolyl cis-trans isomerase cyclophilin type	ZMO0773	ZMO0773	0.30684	0.330588	0.107481	0.32887	0.138053	0.432612	0.249345	0.15373
LysR family transcriptional regulator	ZMO0774	ZMO0774	-0.00752831	0.999369	0.0455831	0.734403	-0.227147	0.204865	-0.203066	0.361522
phospholipid N-methyltransferase PmtA	pmtA	ZMO0776	-0.00043424	1	-0.0444806	0.402705	-0.0405248	0.869635	-0.0883369	0.63529
MBL fold metallo-hydrolase	ZMO0777	ZMO0777	0.0492439	0.912863	-0.168358	0.421791	-0.513339	0.130549	-0.560778	0.158437
inner membrane transporter of efflux system	ZMO0778	ZMO0778	-0.210025	0.337141	-0.486937	0	-0.449466	0.104062	-0.457051	0.136228
RND efflux pump membrane fusion protein	ZMO0779	ZMO0779	-0.114975	0.630727	-0.382626	0.00984615	-0.473361	0.175654	-0.499971	0
AcrB-like multidrug efflux transporter	ZMO0780	ZMO0780	-0.17964	0.048	-0.366047	0.0269286	-0.401411	0.233799	-0.539857	0.143636
LysR family transcriptional regulator	ZMO0781	ZMO0781	-0.137589	0.584788	0.00451914	0.980589	0.0105483	0.964982	-0.0643438	0.712621
glutamyl-tRNA(Gln) amidotransferase B subunit	gatB	ZMO0782	0.178866	0.387954	0.0590363	0.298098	0.00938288	0.918725	-0.024339	0.945464
glutamyl-tRNA(Gln) amidotransferase A subunit	gatA	ZMO0783	-0.00222397	0.99671	0.115555	0.256545	0.125584	0.409388	0.0377935	0.94528
glutamyl-tRNA(Gln) amidotransferase C subunit	gatC	ZMO0784	-0.431868	0.631877	-0.0308717	0.92847	-0.0294361	0.94765	0.148553	0.630401
Holliday junction resolvase YqgF	ZMO0785	ZMO0785	0.105909	0.621104	0.12764	0.331519	0.13689	0.235469	0.210676	0.153547
hypothetical protein	ZMO0786	ZMO0786	-0.67245	0.06	-0.530789	0.0281905	-0.62987	0.105763	-0.528989	0.231552
glucose-methanol-choline oxidoreductase	ZMO0787	ZMO0787	-0.703716	0.036	-0.645411	0.0106667	-0.624023	0.103784	-0.652179	0.190154
CccA and cytochrom C domain-containing protein	cccA1	ZMO0788	-0.465336	0.1548	-0.476417	0.0410602	-0.49169	0.234727	-0.626178	0.068
aspartate carbamoyltransferase	pyrB	ZMO0791	-0.103551	0.690497	0.348733	0.131413	0.50643	0.175969	0.428163	0.142953
dihydroorotase	pyrC1	ZMO0792	0.148279	0.4437	0.143533	0.308688	0.266513	0.316277	0.280101	0.163111
prolyl oligopeptidase	ZMO0794	ZMO0794	-0.266696	0.174535	-0.374154	0.10969	-0.434279	0.10104	-0.144765	0.772787
short-chain dehydrogenase/reductase SDR	ZMO0797	ZMO0797	0.160095	0.330179	0.0529397	0.597992	0.0485853	0.645456	0.122634	0.201164
NodT family RND efflux system outer membrane lipoprotein	ZMO0798	ZMO0798	0.282028	0.575366	0.165931	0.615949	0.170189	0.561865	0.169469	0.617471
ABC transporter related protein	ZMO0800	ZMO0800	0.390914	0.362311	0.287212	0.309512	0.126372	0.668047	0.16499	0.76011
secretion protein HlyD family protein	ZMO0801	ZMO0801	0.445325	0.535909	0.295075	0.253272	0.305101	0.416558	0.161249	0.577313
sporulation domain protein	ZMO0803	ZMO0803	-0.187409	0.270045	-0.382248	0.0405591	-0.261417	0.246748	0.0249729	0.968318
N-acetyl-gamma-glutamyl-phosphate reductase	argC	ZMO0804	-0.276755	0.284525	-0.2261	0.118187	-0.259059	0.376344	-0.34761	0.365014
NLP/P60 protein	ZMO0805	ZMO0805	-0.596167	0.137459	-0.484851	0.078359	-0.550238	0.0998571	-0.346607	0.144941
cytosol aminopeptidase	pepA1	ZMO0806	0.0587438	0.841855	0.0659726	0.158512	0.119145	0.525758	0.0240936	0.842679
ribosomal protein S12 methylthiotransferase RimO	rimO	ZMO0807	-0.0260003	0.904687	-0.0884787	0.315757	-0.0769914	0.632595	-0.0247186	0.883234
DUF167 domain-containing protein	ZMO0809	ZMO0809	-0.105127	0.189067	0.0776641	0.633516	0.125844	0.321521	0.351133	0.0556
tRNA pseudouridine(38-40) synthase TruA	truA	ZMO0810	-0.156978	0.690233	-0.153107	0.124922	0.031271	0.90223	0.0131334	0.966298
methionyl-tRNA formyltransferase	fmt	ZMO0811	0.154944	0.66477	0.143429	0.126541	0.0599791	0.422143	0.306736	0.0255
recombination protein RecR	recR	ZMO0812	0.241034	0.772365	0.00838788	0.986146	0.430532	0.229963	0.265717	0.523173
peptide deformylase	defA	ZMO0813	0.0657991	0.794135	0.249302	0.0402025	0.20538	0.21924	0.203508	0.234464
DNA recombination protein RmuC	rmuC	ZMO0814	0.0970599	0.632645	0.146238	0.147774	0.04938	0.776442	0.0157941	0.946197
hypothetical protein	ZMO0815	ZMO0815	0.93549	0.636926	0	1	0	1	0	1
queuosine biosynthesis protein QueD	queD	ZMO0818	0.191868	0.461696	0.403028	0.214361	0.576557	0.385035	-0.0533117	0.807098
UDP-glucose 6-dehydrogenase	ugd	ZMO0819	-0.152278	0.551417	-0.138503	0.0846845	-0.0862573	0.608612	-0.125072	0.524478
phosphoribosylformylglycinamidine synthase subunit PurL	purL	ZMO0820	0.191366	0.378612	0.0915585	0.363602	0.0480455	0.769429	0.194939	0.154878
cysteine synthase A	cysZ	ZMO0821	0.0179698	0.979177	0.0679468	0.727176	0.0241489	0.95779	0.0608705	0.495988
hypothetical protein	ZMO0822	ZMO0822	0.24775	0.819045	-0.141273	0.855038	0.159911	0.829064	0.601525	0.692226
S-adenosyl-methyltransferase MraW	mraW	ZMO0823	-0.225209	0.461358	-0.0971349	0.564693	0.144276	0.338263	0.131255	0.568824
penicillin-binding protein PBP2	pbp2	ZMO0825	-0.106935	0.709511	-0.251495	0.131755	-0.176094	0.483828	-0.282579	0.14033
UDP-N-acetylmuramoyl-L-alanyl-D-glutamate-2,6-diaminopimelate ligase	murE	ZMO0826	-0.133431	0.452842	-0.183953	0.102571	-0.0582962	0.819001	0.079497	0.397458
UDP-N-acetylmuramoyl-tripeptide-D-alanyl-D-alanine ligase	murF	ZMO0827	-0.134465	0.583993	-0.114717	0.20116	0.0423374	0.824591	0.0128873	0.947058
UDP-N-acetylmuramoyl-L-alanine-D-glutamate ligase	murD	ZMO0829	-0.0907548	0.516864	-0.0693474	0.368952	-0.0790316	0.760177	0.0432377	0.861679
cell division protein FtsW	ftsW	ZMO0830	0.00686264	1	-0.952273	0.107345	-0.0144323	0.97772	-0.0735671	0.876261
undecaprenyldiphospho-muramoylpentapeptide beta-N-acetylglucosaminyltransferase	murG	ZMO0831	0.0168425	0.970496	-0.0938479	0.231539	-0.207605	0.101909	0.00111898	0.992332
UDP-N-acetylmuramate-L-alanine ligase	murC	ZMO0832	-0.065417	0.822304	-0.0857932	0.364545	-0.0426114	0.811893	-0.148338	0.43298
UDP-N-acetylenolpyruvoylglucosamine reductase	murB	ZMO0833	-0.0322978	0.896984	-0.171481	0.298452	-0.0879854	0.640248	-0.136148	0.456858
D-alanine-D-alanine ligase	ddl	ZMO0834	-0.448825	0.335487	-0.13741	0.42793	-0.105008	0.722149	0.0789878	0.567888
cell division protein FtsQ	ftsQ	ZMO0835	-0.0999921	0.575117	-0.227296	0.266261	-0.096646	0.748157	-0.173883	0.334108
cell division protein FtsA	ftsA	ZMO0836	-0.167418	0.532008	-0.0819804	0.490432	-0.0408287	0.824938	-0.139958	0.291587
cell division protein FtsZ	ftsZ	ZMO0837	-0.200202	0.320017	-0.182596	0.0495495	-0.128928	0.27142	-0.198017	0.292356
sporulation domain-containing protein	ZMO0840	ZMO0840	0.0226866	0.982491	0.159825	0.292679	0.278283	0.232136	0.354735	0.323848
chloride channel core	clcA	ZMO0841	0	1	0	1	0	1	0.223047	0.930453
deoxyguanosinetriphosphate triphosphohydrolase	dgtP	ZMO0842	0.0891406	0.691754	0.132591	0.185367	0.191855	0.399097	0.136131	0.363873
arginine--tRNA ligase	argS	ZMO0843	0.0296574	0.855604	0.0501893	0.131789	0.0108147	0.886217	0.0211398	0.941531
sporulation domain-containing protein	ZMO0844	ZMO0844	-0.134367	0.27052	-0.122859	0.117669	-0.0867691	0.757142	-0.184188	0.368668
alanine--tRNA ligase	alaS	ZMO0845	-0.0930367	0.786867	-0.143061	0.0895323	-0.061039	0.647184	-0.0771523	0.460408
membrane component of Kef-type K+ transport system KefB	kefB	ZMO0846	-0.169922	0.661209	-0.209365	0.104922	-0.27382	0.17662	-0.309297	0.160877
carbohydrate-selective porin OprB	oprB2	ZMO0847	-0.269048	0.333173	-0.314659	0.0805315	-0.333588	0.107365	-0.263585	0.244512
Fis family sigma54-specific transcriptional regulator	ntrC	ZMO0850	0.216054	0.631433	0.24907	0.225127	0.322988	0.285162	0.382058	0.333486
pyridoxamine 5'-phosphate oxidase	pdxH	ZMO0851	0.208272	0.582079	0.17436	0.250824	0.0229982	0.922144	0.0682856	0.86204
tRNA preQ1(34) S-adenosylmethionine ribosyltransferase-isomerase QueA	queA	ZMO0852	-0.0669079	0.394523	-0.0247809	0.747912	0.0603021	0.715053	-0.069725	0.639731
peptidyl-prolyl cis-trans isomerase cyclophilin type	ZMO0853	ZMO0853	0.0643482	0.866694	-0.0280126	0.406787	-0.107283	0.468833	0.109832	0.611246
pantetheine-phosphate adenylyltransferase	coaD	ZMO0854	-0.100167	0.826951	0.0121803	0.935307	-0.0287965	0.918559	0.247663	0.396441
geranylgeranyl pyrophosphate synthase	ispA2	ZMO0855	-0.000720978	1	-0.0684929	0.407277	-0.109664	0.500034	-0.033467	0.856022
exodeoxyribonuclease VII small subunit	xseB	ZMO0856	-0.0790393	0.857784	-0.0866381	0.639951	0.0923653	0.819536	-0.106901	0.6229
DUF1013 domain-containing protein	ZMO0857	ZMO0857	-0.125797	0.633054	0.0353266	0.691094	-0.199181	0.525011	0.0886052	0.664087
aminotransferase class V	ZMO0859	ZMO0859	-0.0082709	0.980207	-0.0911814	0.374278	-0.0943025	0.517001	-0.0969804	0.728456
ferredoxin	ZMO0860	ZMO0860	-0.499348	0.889872	0.452439	0.80791	0.608196	0.744836	-0.734145	0.455543
DNA polymerase III subunits gamma and tau	dnaZX	ZMO0861	-0.220993	0.230904	-0.086092	0.363592	0.0215041	0.921816	-0.0797125	0.58303
YbaB/EbfC family DNA-binding protein	ZMO0862	ZMO0862	0.237656	0.616018	0.154903	0.198886	0.0531381	0.292608	0.092296	0.70627
deoxycytidine triphosphate deaminase	dcd	ZMO0863	-0.319246	0.365718	-0.181622	0.117773	-0.158546	0.667092	-0.311422	0.443816
cytidine deaminase	cdd	ZMO0864	0.211857	0.754415	0.374875	0.483787	-0.0463161	0.959876	0.150915	0.856781
replicative DNA helicase	dnaB	ZMO0865	0.0110703	0.9861	-0.185572	0.0271373	-0.0235418	0.92069	-0.026226	0.895926
cation diffusion facilitator family transporter	ZMO0866	ZMO0866	1.10459	0.69515	-0.143583	0.7596	-0.00440407	0.991835	0.0683467	0.881568
hopanoid-associated sugar epimerase HpnA	hpnA	ZMO0867	0.0657921	0.778803	0.0378386	0.682892	0.173231	0.332473	0.0800196	0.642516
hopene-associated glycosyltransferase HpnB	hpnB	ZMO0868	0.301173	0.842626	-0.261728	0.146773	0.277995	0.770849	0.541656	0.490301
squalene synthase HpnC	hpnC	ZMO0869	-0.0554746	0.915557	0.134333	0.201142	0.0385742	0.889696	0.0835298	0.478599
squalene synthase HpnD	hpnD	ZMO0870	0.0406151	0.909011	-0.276752	0.0886699	-0.194291	0.390447	0.0111968	0.97951
squalene-associated FAD-dependent desaturase HpnE	hpnE	ZMO0871	0.165985	0.336324	0.120034	0.147907	0.0327632	0.881732	0.31901	0.250619
squalene-hopene cyclase	shc1	ZMO0872	-0.16107	0.631314	-0.0883865	0.684014	-0.129243	0.561447	-0.170855	0.354398
hopanoid-associated phosphorylase	hpnG	ZMO0873	-0.0803509	0.896713	-0.120855	0.656731	0.175302	0.399281	0.0592105	0.856794
hopanoid biosynthesis associated radical SAM protein HpnH	hpnH	ZMO0874	-0.0956542	0.768371	-0.601262	0.0238857	-0.592799	0.150467	-0.43786	0.269869
4-hydroxy-3-methylbut-2-enyl diphosphate reductase	ispH	ZMO0875	0.114312	0.636335	0.0341352	0.81387	-0.00866063	0.97354	0.10542	0.641903
hopanoid biosynthesis associated membrane protein HpnM	hpnM	ZMO0876	0.418034	0.0883509	0.240083	0.162867	0.221833	0.103176	-0.0308043	0.94187
hypothetical protein	ZMO0877	ZMO0877	-0.203543	0.973003	1.14503	0.127053	1.73427	0.184286	-0.564646	0.708423
response regulator receiver modulated CheB methylesterase	cheB2	ZMO0878	0.775884	0.0656585	0.851409	0.0275349	0.723346	0.09	0.772598	0.176485
putative CheA signal transduction histidine kinase	cheA2	ZMO0880	-0.069273	0.932424	0.0445989	0.794904	0.0416908	0.91368	0.00979932	0.979494
methyl-accepting chemotaxis sensory transducer	mcpA2	ZMO0882	0.0205612	0.982381	0.178225	0.126459	0.11768	0.438256	0.178865	0.394147
ribosomal protein S9	rpsI	ZMO0883	0.10577	0.430147	0.191992	0.109264	0.136945	0.250403	0.0401408	0.697247
ribosomal protein L13	rplM	ZMO0884	0.0950877	0.80217	0.0736783	0.365446	0.139294	0.385186	-0.00983302	0.981373
DUF192 domain-containing protein	ZMO0886	ZMO0886	-0.0286992	0.952012	0.275832	0.25613	0.148711	0.320897	-0.0981089	0.759452
resolvase domain-containing protein	ZMO0888	ZMO0888	-0.0891132	0.867278	0.244053	0.132012	0.138545	0.756527	0.283381	0.448659
aldose 1-epimerase	mro	ZMO0889	-0.572907	0.134145	-0.237108	0.126451	-0.154753	0.45648	-0.197225	0.622847
lysine--tRNA ligase	lysK	ZMO0890	-0.00253677	0.997945	-0.0308437	0.50761	0.131106	0.446721	0.050607	0.61565
helicase c2	ZMO0892	ZMO0892	0.381801	0.0712222	-0.0342007	0.919666	-0.056893	0.838795	-0.0298347	0.856323
beta-lactamase	ZMO0893	ZMO0893	0.0754223	0.823845	0.0185134	0.93546	0.0668971	0.506813	0.0634626	0.68202
NERD (the nuclease-related domain) domain-containing protein	ZMO0894	ZMO0894	0.222209	0.0833077	0.0825609	0.263789	-0.0270964	0.912819	0.0854136	0.663791
hypothetical protein	ZMO0895	ZMO0895	0.856024	0.617838	0.0425561	0.982645	1.47539	0.414309	0.627258	0.397768
hypothetical protein	ZMO0896	ZMO0896	0.145464	0.431411	0.186566	0.0899216	0.0803204	0.447104	0.19036	0.254563
NAD+ synthetase	ZMO0899	ZMO0899	0.0121155	0.987532	-0.181351	0.0801325	-0.0542514	0.801372	-0.0369701	0.896244
glutamyl-tRNA synthetase	gltX1	ZMO0900	0.0291316	0.855553	-0.0765769	0.175621	-0.0713736	0.769339	-0.166777	0.490888
2-isopropylmalate synthase	leuA	ZMO0903	0.0921033	0.735353	0.141521	0.272684	0.330642	0.208056	0.40099	0.153056
beta-galactosidase	bga	ZMO0904	0.186357	0.515586	0.0669422	0.713842	0.0958951	0.740912	0.049427	0.753739
glucan biosynthesis protein MdoD	mdoD	ZMO0905	0.0415204	0.951318	-0.0950241	0.465634	-0.103021	0.757752	0.048364	0.95041
glucan biosynthesis glucosyltransferase MdoH	mdoH	ZMO0907	-0.0170689	0.987902	-0.210239	0.15977	-0.302968	0.104129	-0.0890452	0.820046
putative capsule polysaccharide export protein	ZMO0908	ZMO0908	-0.0234928	0.979081	-0.119825	0.222066	0.0536276	0.875276	-0.135742	0.432235
putative UDP-glucose-glycogen glucosyltransferase	ZMO0909	ZMO0909	-0.0130138	0.985107	0.100586	0.353036	0.0562166	0.838005	0.114005	0.429029
ATPase component of polysaccharide export system	ZMO0910	ZMO0910	0.230274	0.551451	0.148029	0.299757	0.166299	0.192116	0.0921033	0.623266
polysaccharide export system periplasmic protein	ZMO0911	ZMO0911	0.0145213	0.959916	-0.118427	0.0990698	-0.11686	0.647231	-0.0804017	0.333751
DUF885 domain-containing protein	ZMO0912	ZMO0912	-0.627481	0.130765	-0.77507	0.0697576	-0.894965	0.133395	-0.867668	0.201818
branched-chain amino acid aminotransferase	ilvE	ZMO0913	0.0155226	0.983148	0.183254	0.105855	0.199018	0.284695	0.27198	0.158205
bifunctional methylenetetrahydrofolate dehydrogenase/methenyltetrahydrofolate cyclohydrolase	folD	ZMO0914	0.366875	0.242942	0.217582	0.0832749	0.105485	0.555754	0.426411	0.171834
copper-translocating P-type ATPase	copA	ZMO0915	0.209857	0.476422	0.234371	0.144976	0.273319	0.348533	0.297089	0.140103
heavy metal transport/detoxification protein	ZMO0916	ZMO0916	0.285864	0.372902	0.139008	0.22604	0.236331	0.275425	0.1134	0.438835
2-nitropropane dioxygenase NPD	ZMO0917	ZMO0917	0.173714	0.486074	0.0837809	0.125115	0.14676	0.2364	0.0834064	0.543168
catalase	katE	ZMO0918	0.184691	0.347439	0.181666	0.131808	0.126973	0.439318	-0.0400963	0.884353
diguanylate cyclase with beta propeller sensor	ZMO0919	ZMO0919	-0.122243	0.468996	0.0172723	0.854375	-0.118635	0.665786	-0.233466	0.277351
conserved hypothetical protein	ZMO0920	ZMO0920	-0.543646	0.196687	-0.181251	0.213736	-0.295907	0.183338	-0.821795	0.163797
hypothetical protein	ZMO0921	ZMO0921	0.0916843	0.713765	-0.051005	0.683768	0.0865046	0.704827	0.373733	0.229009
helix-turn-helix domain-containing protein	ZMO0922	ZMO0922	-0.00759188	0.992502	-0.0407187	0.817403	0.063921	0.738508	0.000755946	0.99893
arginine biosynthesis bifunctional protein ArgJ	argJ	ZMO0923	0.120944	0.321898	0.0500882	0.604299	0.133512	0.239568	0.0154025	0.961993
preprotein translocase SecA subunit	secA	ZMO0924	-0.118706	0.368086	-0.118179	0.134073	0.0142593	0.958117	-0.0846914	0.367991
cold-shock DNA-binding domain protein	ZMO0925	ZMO0925	-1.29578	0.0342857	-0.335958	0.225483	-0.686703	0.101673	-0.712076	0.152903
outer membrane lipid asymmetry maintenance protein MlaD	mlaD	ZMO0926	-0.171736	0.757782	0.0234763	0.96433	0.0685679	0.882303	0.160576	0.679919
leucyl/phenylalanyl-tRNA--protein transferase	aat	ZMO0927	0.225721	0.239603	0.124217	0.49375	0.310848	0.107692	0.0920556	0.490778
peptidase S58 DmpA	ZMO0928	ZMO0928	-0.132152	0.691408	0.0542857	0.755559	0.0842603	0.864184	-0.106266	0.85617
glutathione S-transferase domain protein	gstA	ZMO0935	0.312396	0.283095	0.355504	0.0833371	0.168671	0.222027	0.252541	0.181236
aromatic-amino-acid transaminase	ZMO0937	ZMO0937	-0.246569	0.300941	-0.327671	0.0815621	-0.284493	0.246384	-0.128947	0.522981
alkaline phosphatase PhoD	phoD	ZMO0938	0.00498454	0.998378	-0.326096	0.0823121	-0.221887	0.446635	-0.133436	0.804795
guanine deaminase	ZMO0939	ZMO0939	0.0798009	0.30438	0.0534128	0.619572	-0.0833511	0.757389	0.0488358	0.819691
MarR family transcriptional regulator	ZMO0940	ZMO0940	0.197924	0.304987	0.17462	0.117565	0.134519	0.701994	0.415675	0.428334
NAD-dependent epimerase/dehydratase	ZMO0941	ZMO0941	-0.0514749	0.903596	0.124163	0.251033	0.0221119	0.90156	0.319825	0.38362
sucrose-6-phosphate hydrolase	scrB	ZMO0942	0.0129731	0.986802	0.0949256	0.354479	0.0939178	0.491344	-0.0634931	0.793104
galactose mutarotase-like structural superfamily protein	ZMO0945	ZMO0945	0.387908	0.270237	0.239637	0.110438	0.246044	0.237901	0.285295	0.400179
trigger factor	tig	ZMO0946	0.0247701	0.948509	0.0171343	0.880685	-0.0588977	0.472742	-0.147053	0.451641
glycosyl transferase family 2	ZMO0947	ZMO0947	0.0907154	0.935062	-0.582321	0.297709	0.0881036	0.606863	-0.1231	0.928377
ATP-dependent Clp protease proteolytic subunit ClpP	clpP	ZMO0948	-0.0163403	0.987415	-0.016681	0.930851	0.154151	0.459484	0.0424423	0.729906
ATP-dependent Clp protease ATP-binding subunit ClpX	clpX	ZMO0949	0.0535984	0.892548	-0.139548	0.211074	-0.0578384	0.617167	-0.28885	0.187438
GCN5-related N-acetyltransferase	ZMO0950	ZMO0950	-0.179874	0.691665	-0.374328	0.00853333	-0.373468	0.229559	-0.233406	0.406339
coproporphyrinogen oxidase	hemF	ZMO0951	-0.00389989	0.997836	-0.0567576	0.799311	-0.373462	0.359992	-0.0574493	0.895655
SpoU type tRNA/rRNA methyltransferase	ZMO0952	ZMO0952	-0.254491	0.584822	-0.0282396	0.877645	-0.0575708	0.820772	-0.0630779	0.92023
ubiquinol-cytochrome c reductase iron-sulfur subunit	ZMO0956	ZMO0956	-0.668741	0.0727568	-0.418018	0.117179	-0.383636	0.196045	-0.438149	0.388103
cytochrome b	cytB	ZMO0957	0.0715777	0.925816	0.16423	0.41482	-0.236235	0.368211	-0.349115	0.369532
cytochrome c1	petC	ZMO0958	0.427886	0.451206	0.181975	0.365068	0.237877	0.446704	0.209812	0.38007
class I cytochrome c	cccA2	ZMO0961	0.0487054	0.970633	0.247239	0.370977	0.177035	0.8119	-0.320281	0.543787
N-acetylglucosamine-6-phosphate deacetylase	nagA	ZMO0962	0.040336	0.778678	0.0576134	0.364443	0.156513	0.404334	0.131499	0.542952
TetR family transcriptional regulator	ZMO0963	ZMO0963	0.195035	0.574586	0.167662	0.381611	0.317921	0.246761	0.226203	0.491504
NodT family RND efflux system outer membrane lipoprotein	ZMO0964	ZMO0964	0.211962	0.459109	0.192767	0.253811	-0.000528336	0.998485	0.124146	0.62301
efflux pump membrane protein	ZMO0965	ZMO0965	0.108814	0.575646	0.0471643	0.665454	0.0201874	0.953389	-0.0302245	0.857173
EmrB/QacA subfamily drug resistance transporter	emrB	ZMO0966	0.271389	0.957633	-0.628031	0.624305	0.847183	0.667807	-0.00308037	0.997935
purine nucleoside permease	ZMO0970	ZMO0970	-0.517469	0.328137	-0.350861	0.0251915	-0.311028	0.105939	-0.239012	0.644327
adenosine deaminase	add2	ZMO0971	-0.0978896	0.632827	0.101856	0.0894829	-0.0172723	0.893234	0.0394046	0.870373
hopanoid biosynthesis associated glycosyl transferase protein HpnI	ZMO0972	ZMO0972	0.20812	0.741178	0.194494	0.26599	-0.0926793	0.667144	0.0473601	0.951462
hopanoid biosynthesis associated radical SAM protein HpnJ	ZMO0973	ZMO0973	0.00351715	0.998596	-0.0287221	0.87456	-0.0653934	0.283819	-0.0221341	0.711811
hopanoid biosynthesis associated protein HpnK	ZMO0974	ZMO0974	0.0490386	0.840558	-0.0667222	0.469131	-0.182536	0.221084	-0.0716826	0.728037
conserved hypothetical membrane spanning protein	ZMO0975	ZMO0975	0.00252215	0.998293	0.227079	0.437069	-0.0921803	0.829427	0.103263	0.808852
xylose reductase	xyrA	ZMO0976	0.303525	0.458024	0.419263	0.0991312	0.129999	0.166612	0.0813726	0.454962
periplasmic binding protein	ZMO0978	ZMO0978	0.355677	0.362662	-0.042064	0.930886	-0.103966	0.396378	-0.412497	0.45886
TonB-dependent receptor	ZMO0979	ZMO0979	-2.51194	0.0817358	-1.66431	0.202004	-1.94757	0.177913	-2.53767	0.151529
DNA polymerase III beta subunit	dnaN	ZMO0980	0.0144889	0.982632	0.0921853	0.353447	0.104767	0.50752	0.136375	0.398032
ABC transporter ATP-binding protein	ZMO0981	ZMO0981	0.217355	0.18099	0.167702	0.336237	0.173002	0.371252	0.0794868	0.842942
type 1 ABC transporter solute-binding subunit	ZMO0983	ZMO0983	0.280607	0.542667	1.10535	0.23561	0.0842349	0.901397	0.239384	0.602545
lipoprotein NlpD	nlpD	ZMO0984	0.209209	0.575367	0.287423	0.198709	0.181947	0.395	-0.173239	0.772232
5'-nucleotidase SurE	surE	ZMO0985	0.12355	0.227177	0.192258	0.198488	0.186887	0.198929	-0.0336876	0.926731
seryl-tRNA synthetase	serS	ZMO0986	0.1747	0.319966	0.0601896	0.156389	0.10988	0.322877	-0.0177097	0.962037
TraR/DksA family transcriptional regulator	ZMO0987	ZMO0987	-0.216007	0.340713	-0.494151	0.110572	-0.465463	0.195617	-0.367616	0.278256
DUF465 domain-containing protein	ZMO0988	ZMO0988	0	1	-0.0122534	0.993128	-0.194228	0.802594	0.666602	0.667195
heat-shock protein IbpA	ibpA	ZMO0989	-0.46197	0.280628	-0.0810369	0.882167	0.538771	0.460341	-0.462344	0.520376
peptidase S10 serine carboxypeptidase	ZMO0992	ZMO0992	-0.301071	0.225667	-0.603938	0.0382921	-0.568684	0.09024	-0.470808	0.145102
conserved hypothetical protein	ZMO0994	ZMO0994	0.53333	0.364391	0.226574	0.156767	0.102909	0.336604	0.147277	0.420454
mechanosensitive ion channel MscS	mscS1	ZMO0996	0.239237	0.194656	0.253849	0.205519	0.345795	0.235084	0.347178	0.14163
2-dehydro-3-deoxyphosphogluconate aldolase/4-hydroxy-2-oxoglutarate aldolase	eda	ZMO0997	0.187525	0.369174	0.256994	0.0702187	0.220399	0.237138	0.193094	0.404514
peptide methionine sulfoxide reductase	msrA	ZMO0998	0.446057	0.355915	0.225919	0.2925	0.127384	0.619568	0.218246	0.453835
L-threonylcarbamoyladenylate synthase	ZMO0999	ZMO0999	0.133977	0.365066	0.0645364	0.218409	0.172038	0.285178	-0.00562159	0.977662
5- methyltetrahydropteroyltriglutamate--homocysteine S-methyltransferase	metE	ZMO1000	0.175878	0.46948	-0.0669212	0.41275	-0.126723	0.446019	-0.153306	0.620208
phosphoglucosamine mutase	glmM	ZMO1002	0.199846	0.439869	0.0219282	0.425107	0.0937926	0.630988	0.220527	0.18643
bifunctional hydroxymethylpyrimidine/phosphomethylpyrimidine kinase	thiD	ZMO1003	-0.0359268	0.902452	-0.0862598	0.400603	0.0331217	0.93156	0.00754611	0.984993
ribonuclease H	rnhB	ZMO1004	0.08483	0.802494	-0.223178	0.242985	-0.0499783	0.890513	0.00908089	0.984153
site-specific DNA-methyltransferase	ZMO1005	ZMO1005	0.0978508	0.81294	-0.217827	0.111448	-0.0428371	0.91957	-0.00677935	0.986884
dihydropteroate synthase	folP	ZMO1006	-0.115568	0.543422	-0.0466143	0.166052	0.00193151	0.993596	0.0195955	0.95704
UPF0187 domain-containing protein	ZMO1007	ZMO1007	-0.193458	0.731613	-0.113185	0.533881	-0.00435575	0.99078	-0.00698535	0.984203
glycolate oxidase subunit GlcD	glcD	ZMO1008	-0.0149562	0.955859	0.011776	0.830883	0.0836773	0.386759	-0.0142682	0.958662
SapC family protein	ZMO1009	ZMO1009	-0.82983	0.0621333	-0.642787	0.0101818	-0.700731	0.0417143	-0.825473	0
DUF4186 domain-containing protein	ZMO1010	ZMO1010	-0.159624	0.0630857	0.432658	0.0989589	0.431519	0.169106	0.350144	0.21915
YacG/DUF329 family protein	ZMO1011	ZMO1011	-0.127632	0.932049	-0.0163651	0.98059	0.118739	0.677397	-0.372754	0.767574
conserved hypothetical protein	ZMO1012	ZMO1012	0.0690886	0.85896	0.0324364	0.883774	0.186571	0.429708	0.156958	0.368028
septum formation inhibitor Maf	ZMO1013	ZMO1013	0.126003	0.488784	0.0523822	0.85471	-0.0481326	0.860163	0.168943	0.339491
translation initiation factor IF-1	infA	ZMO1014	0.0583344	0.674667	0.0220572	0.939028	-0.0951627	0.814146	0.0389926	0.89521
DUF330 domain-containing protein	ZMO1015	ZMO1015	-0.0263475	0.972868	0.0969385	0.737114	0.135632	0.806114	-0.134942	0.395085
MCE family protein	ZMO1016	ZMO1016	-0.0868263	0.906938	-0.0927842	0.563889	-0.206098	0.389469	-0.156087	0.4416
iron ABC transporter ATP-binding protein	ZMO1017	ZMO1017	-0.281766	0.26117	-0.0624854	0.419924	-0.0464611	0.895116	-0.115614	0.342097
DUF140 domain-containing protein	ZMO1018	ZMO1018	0.013553	0.989666	0.00290171	0.996505	-0.151675	0.627031	-0.172806	0.438735
deoxyhypusine synthase	dys	ZMO1019	-0.153828	0.4068	-0.19309	0.0870505	-0.169298	0.299552	0.0690791	0.68177
alpha/beta fold family hydrolase-like protein	ZMO1021	ZMO1021	-0.0729364	0.651102	0.187459	0.372926	-0.00387065	0.964279	-0.0728385	0.678283
cysteine desulfurase NifS/SufS	nifS1	ZMO1022	-0.0128822	0.969346	0.000427246	0.992008	0.0720024	0.756563	0.0533702	0.829046
putative 7-cyano-7-deazaguanine synthase QueC	ZMO1023	ZMO1023	0.111972	0.639363	0.0788091	0.297776	-0.103661	0.666387	0.0100498	0.981307
anaerobic ribonucleoside-triphosphate reductase	nrdD	ZMO1025	0.200322	0.302732	-0.161823	0.213567	-0.168249	0.718132	-0.0410035	0.956535
hypothetical protein	ZMO1026	ZMO1026	0.643328	0.540214	-0.669151	0.120675	-0.0318877	0.975393	-0.354489	0.883871
pyruvate-formate lyase-activating enzyme RflA	pflA1	ZMO1027	0.452208	0.44799	0.570637	0.137102	0.667776	0.266141	0.510372	0.192064
ABC transporter related protein	ZMO1029	ZMO1029	-0.101604	0.790819	-0.0676931	0.747293	0.00409253	0.991969	-0.0951468	0.581854
dual-specificity RNA methyltransferase RlmN	rlmN	ZMO1032	-0.103382	0.669556	-0.216469	0.0391579	0.0491378	0.74745	-0.0559756	0.54713
cyclopropane fatty-acyl-phospholipid synthase Cfa	cfa	ZMO1033	0.218602	0.544036	0.211895	0.111508	0.265945	0.177504	0.221205	0.279222
calcium-binding EF-hand-containing protein	ZMO1034	ZMO1034	0.252101	0.348014	0.0648295	0.370822	0.0414371	0.876434	0.0613702	0.781523
argininosuccinate synthase ArgG	argG	ZMO1036	0.169712	0.363394	0.0777804	0.225891	0.066213	0.611088	-0.0548808	0.809267
ribonucleoside-diphosphate reductase alpha subunit	nrdA	ZMO1039	0.512807	0.302354	0.409918	0.0386494	0.528212	0.136304	0.525531	0.154533
NUDIX-like hydrolase	ZMO1041	ZMO1041	-0.105048	0.620513	-0.0905533	0.527923	-0.0131404	0.95891	0.0739117	0.4211
DUF477 domain-containing protein	ZMO1042	ZMO1042	0.100452	0.900439	-0.0280482	0.904041	-0.0723788	0.730444	-0.0731188	0.85037
LemA family protein	ZMO1043	ZMO1043	-0.277173	0.66599	0.0534967	0.541909	-0.16467	0.638133	0.271576	0.563974
large conductance mechanosensitive channel protein	ZMO1044	ZMO1044	-0.649495	0.287093	-0.468319	0.156224	-0.261939	0.60923	-0.364846	0.355067
phosphate ABC transporter substrate-binding protein PstS	pstS	ZMO1047	-0.261564	0.0334286	-0.140202	0.272632	-0.139661	0.130952	-0.207529	0.164324
phosphate ABC transporter inner membrane subunit PstC	pstC	ZMO1048	0.387609	0.787186	-0.122969	0.91329	-0.156425	0.789698	-0.311778	0.449685
phosphate ABC transporter inner membrane subunit PstA	pstA	ZMO1049	-0.263213	0.690411	0.361637	0.170124	-0.199832	0.632734	-0.0501448	0.95961
phosphate ABC transporter ATPase subunit	pstB	ZMO1050	-0.16482	0.432209	-0.0991789	0.258335	-0.117549	0.454253	-0.120012	0.297145
phosphoribosylaminoimidazole-succinocarboxamide synthase	purC	ZMO1052	0.0237948	0.931518	-0.0618782	0.088201	0.0467822	0.631872	-0.0712948	0.639609
DNA topoisomerase IV A subunit	parC	ZMO1054	0.07514	0.757411	0.206755	0.226021	0.301411	0.332091	0.138644	0.421273
bifunctional diguanylate cyclase (GGDEF)/phosphodiesterase	ZMO1055	ZMO1055	-0.673218	0.0423529	-0.376844	0.068896	-0.274128	0.268293	-0.278907	0.341834
polynucleotide adenylyltransferase	cca	ZMO1056	0.353382	0.15481	0.227719	0.054087	0.214779	0.267746	0.330054	0.198825
GCN5-related N-acetyltransferase	ZMO1057	ZMO1057	0.511468	0.137947	0.346324	0.131372	0.470861	0.234857	0.645806	0.313012
dihydroneopterin aldolase	ZMO1059	ZMO1059	0.145802	0.831425	0.214148	0.406002	0.468054	0.127544	0.338134	0.245486
superoxide dismutase	sod	ZMO1060	0.502228	0.524511	0.515753	0.133202	0.254909	0.543649	0.229991	0.523559
Fis family sigma54-specific transcriptional acivator	pspF	ZMO1061	0.309561	0.66036	0.218561	0.148163	0.276426	0.603496	0.423813	0.357794
putative peripheral inner membrane phage shock protein pspD	pspD	ZMO1062	0	1	0	1	1.38507	0.391234	-0.507072	0.747993
phage shock protein A PspA	pspA	ZMO1063	0.026385	0.982403	-0.000523885	0.997052	0.141738	0.547768	-0.0479393	0.859734
phage shock protein B PspB	pspB	ZMO1064	-0.166977	0.860342	-0.100306	0.707469	0.161964	0.72311	-0.161535	0.759621
phage shock protein C PspC	pspC	ZMO1065	0.0985146	0.931051	0.0172386	0.961947	0.131032	0.818797	-0.384928	0.362708
sulfur acceptor protein	sufE	ZMO1067	-0.0222626	0.987311	0.0155284	0.947523	0.0498746	0.901185	-0.00729243	0.970555
conserved hypothetical protein	ZMO1068	ZMO1068	-0.130538	0.860731	0.00708644	0.988448	0.0538584	0.940036	0.0700429	0.987415
heat shock protein DnaJ domain protein	ZMO1069	ZMO1069	-0.092858	0.8672	-0.0443141	0.93068	-0.0454019	0.820627	0.22001	0.402089
signal recognition particle-docking protein FtsY	ftsY	ZMO1070	0.173386	0.364575	0.0916487	0.51105	0.190124	0.23687	0.357105	0.157083
MiaB-like tRNA modifying enzyme	ZMO1071	ZMO1071	-0.137655	0.778931	0.0626481	0.653456	0.193714	0.391574	0.0552909	0.761303
diaminopimelate epimerase	dapF	ZMO1072	-0.212723	0.710628	-0.0248922	0.919968	0.096639	0.521795	0.364075	0.181414
signal recognition particle protein	ffh	ZMO1075	-0.00638453	0.998149	-0.0237897	0.848887	0.0476875	0.652449	0.120693	0.551244
ribosomal protein S16	rpsP	ZMO1076	-0.00199636	0.998269	0.00314713	0.987997	0.179248	0.565072	-0.0109812	0.981047
16S rRNA processing protein RimM	rimM	ZMO1077	0.198121	0.58433	-0.054484	0.878982	0.074632	0.802162	0.252782	0.284696
tRNA (guanosine(37)-N1)-methyltransferase TrmD	trmD	ZMO1078	0.261681	0.629857	0.0712821	0.484289	-0.00696309	0.986094	0.472804	0.144588
ribosomal protein L19	rplS	ZMO1079	0.0612742	0.853202	0.0126947	0.936401	0.173945	0.33308	-0.00680542	0.980766
hypothetical protein	ZMO1080	ZMO1080	-0.11173	0.942236	0.194074	0.834418	-0.649448	0.223027	-0.227264	0.588941
hypothetical protein	ZMO1081	ZMO1081	-0.321716	0.453423	-0.403806	0.181836	-0.491224	0.101548	-0.208623	0.49737
cellulose synthase subunit B BscB	bscB	ZMO1084	-0.265228	0.320931	-0.329214	0.0489709	-0.205587	0.284352	-0.306471	0.139439
cellulose synthase operon C domain protein	bcsC	ZMO1085	-0.383003	0.138254	-0.599993	0.026	-0.513393	0.15	-0.629431	0.141167
endo-1,4-beta-D-glucanase (Cellulase)	celA	ZMO1086	-0.128376	0.635191	-0.288144	0.0610248	-0.320498	0.094	-0.168704	0.14825
membrane-bound lytic murein transglycosylase A	mltA	ZMO1087	0.0575161	0.897542	0.0336005	0.897062	-0.00802612	0.978221	-0.0500978	0.932996
rare lipoprotein A RlpA	rlpA	ZMO1088	-0.83615	0.279251	-0.814579	0.10645	-0.19099	0.882965	0.129215	0.972292
D-alanyl-D-alanine carboxypeptidase DacC	dacC	ZMO1089	-0.0905914	0.575773	-0.0803789	0.564341	-0.200883	0.565709	-0.240753	0.157315
dTMP kinase	tmk	ZMO1090	-0.199144	0.507533	-0.168584	0.274	-0.00611051	0.982552	-0.0385621	0.856025
DNA polymerase III subunit delta'	holB	ZMO1091	-0.125008	0.780103	0.00794983	0.964988	-0.0773786	0.709824	0.0521609	0.738855
methionine--tRNA ligase	metG	ZMO1092	-0.0724818	0.693983	0.00594139	0.938998	0.00075086	0.994186	-0.0175584	0.963585
TatD family deoxyribonuclease	ZMO1093	ZMO1093	-0.0163975	0.964038	-0.0873458	0.243076	-0.0648295	0.27266	-0.160095	0.633347
metallo-beta-lactamase-like protein	ZMO1094	ZMO1094	0.0489833	0.970996	0.249318	0.295862	-0.333222	0.39645	0.0460205	0.948245
nucleoside triphosphate pyrophosphohydrolase MazG	mazG	ZMO1095	0.323023	0.285621	0.192666	0.42511	0.0469545	0.872814	-0.152295	0.581136
ribonuclease R	rnr	ZMO1096	-0.059131	0.778886	-0.0443427	0.620971	0.0861556	0.543473	-0.0874863	0.645597
thioredoxin-domain containing protein	ZMO1097	ZMO1097	0.308716	0.321115	0.24966	0.579823	0.134813	0.608106	0.300819	0.158174
double-strand break repair helicase AddA	addA	ZMO1098	0.0988719	0.280968	0.0073115	0.959382	0.072113	0.631457	0.152237	0.432356
double-strand break repair protein AddB	addB	ZMO1099	0.137011	0.373333	0.0168902	0.893485	0.202712	0.435215	0.196913	0.332858
nucleotidyl transferase	ZMO1100	ZMO1100	0.0158558	0.980458	0.185359	0.146667	0.199158	0.283741	0.25869	0.24787
TsaE (Threonylcarbamoyl adenosine biosynthesis protein) domain-containing protein	ZMO1101	ZMO1101	-0.0039463	0.997678	0.008358	0.939522	-0.119343	0.659727	0.136511	0.79776
histidine kinase	ZMO1102	ZMO1102	0.0333856	0.93506	-0.000431697	0.998643	0.0973117	0.789349	0.119314	0.576594
histidine kinase	ZMO1105	ZMO1105	-0.199549	0.46857	-0.0639375	0.661281	-0.039065	0.842204	-0.0895131	0.653001
transcriptional regulator AsnC family	ZMO1107	ZMO1107	0.126388	0.779645	0.0548248	0.622212	0.0309168	0.858488	0.164787	0.246887
tetratricopeptide-like helical domain-containing protein	ZMO1109	ZMO1109	-0.0212809	0.906048	0.00583903	0.954313	-0.0385513	0.844406	-0.0684293	0.427676
septation protein IspZ	ispZ	ZMO1112	0.103527	0.905962	0.0612062	0.618718	-0.245066	0.605384	0.198837	0.569544
FAD-dependent pyridine nucleotide-disulfide oxidoreductase	ndh	ZMO1113	0.256952	0.285898	0.206516	0.0831186	-0.00608953	0.971504	0.00472641	0.959513
uracil-DNA glycosylase	ung1	ZMO1114	0.0021801	1	-0.0896556	0.691876	-0.190645	0.714857	-0.027668	0.934541
glutamate synthase small subunit	gltD	ZMO1116	-0.0494347	0.949516	-0.239173	0.1373	-0.195265	0.237399	-0.24759	0.155589
glutamate synthase large subunit	gltB	ZMO1117	-0.231787	0.550348	-0.232293	0.14602	-0.119651	0.542479	-0.163033	0.156579
glutathione S-transferase	ZMO1118	ZMO1118	-0.083409	0.860046	0.0226924	0.944375	0.208062	0.334272	0.099542	0.702674
MerR family transcriptional regulator	ZMO1121	ZMO1121	-0.0590286	0.919306	-0.405651	0.190595	-0.123303	0.69052	-0.324878	0.380895
integration host factor alpha subunit	himA	ZMO1122	-0.398058	0.196127	-0.192155	0.238437	-0.369347	0.316259	-0.193218	0.622156
sigma-54-dependent Fis family transcriptional regulator	ZMO1124	ZMO1124	0.165243	0.48886	0.0905329	0.354466	0.170351	0.329077	0.120382	0.423919
histidine kinase	ntrY	ZMO1125	-0.0797176	0.787836	-0.0786368	0.398579	-0.00945727	0.985367	0.0740878	0.798656
Fis family transcriptional regulator	ntrX	ZMO1126	-1.14729	0.65981	-0.252823	0.819162	0.423759	0.845534	-0.843321	0.576169
putative tRNA dihydrouridine synthase	nifR3	ZMO1127	-0.538439	0.28292	-0.325583	0.205678	0.0417175	0.932745	0.158022	0.843323
bifunctional 2-C-methyl-D-erythritol 4-phosphate cytidylyltransferase/2-C-methyl-D-erythritol 2,4-cyclodiphosphate synthase	ispDF	ZMO1128	-0.0298977	0.859784	0.0302753	0.512836	0.0335859	0.818954	0.00471052	0.983493
hypothetical protein	ZMO1129	ZMO1129	0.163521	0.540504	0.319115	0.354126	0.33364	0.356556	0.446221	0.582738
CinA domain-containing protein	ZMO1130	ZMO1130	0.162219	0.584006	-0.0155233	0.927116	-0.123856	0.320205	0.374982	0.200896
putative coenzyme Q-binding protein	ZMO1131	ZMO1131	-0.109603	0.690572	0.103474	0.610877	0.1496	0.521082	0.239631	0.635003
lipoic acid synthetase	lipA	ZMO1132	-0.0420831	0.857231	0.0611331	0.713567	0.1539	0.549384	-0.0696926	0.784911
carbonate dehydratase	ZMO1133	ZMO1133	0.120829	0.836638	0.12371	0.181686	0.0367114	0.893219	0.0178668	0.979711
peptidase U62 modulator of DNA gyrase	ZMO1135	ZMO1135	0.105317	0.639641	0.0613651	0.243479	0.016751	0.931338	0.0269356	0.943026
MauG-like cytochrome-c peroxidase	mauG	ZMO1136	-0.170404	0.534042	-0.172915	0.170514	-0.228053	0.430667	-0.401519	0.16761
phosphoserine phosphatase SerB	serB	ZMO1137	0.0904859	0.614356	0.0237745	0.750254	0.0502218	0.819495	0.0046978	0.991791
tRNA (adenosine(37)-N6)-dimethylallyltransferase MiaA	miaA	ZMO1138	-0.0197055	0.971176	0.00238927	0.992274	0.111677	0.495775	0.147905	0.582407
acetolactate synthase large subunit	ilvI	ZMO1139	0.310054	0.043	0.422714	0.0467475	0.46484	0.0976364	0.492722	0.142764
acetolactate synthase small subunit	ilvH	ZMO1140	0.205257	0.489751	0.424009	0.0402162	0.427382	0.108444	0.406279	0.151277
ketol-acid reductoisomerase	ilvC	ZMO1141	0.157419	0.318615	0.294731	0.049451	0.423335	0.176416	0.353081	0.145314
thioredoxin reductase	trxB	ZMO1142	0.155554	0.615426	-0.0487811	0.780202	-0.159031	0.591829	-0.0618966	0.883426
chloramphenicol acetyltransferase	ZMO1143	ZMO1143	-0.334678	0.538075	-0.0234509	0.95006	0.241138	0.411747	0.0137088	0.895829
ribosomal protein L31	rpmE	ZMO1145	-0.0975812	0.631586	0.0777505	0.659681	0.111021	0.326409	0.15029	0.261597
beta-hydroxyacyl-(acyl-carrier-protein) dehydratase FabZ	fabZ	ZMO1146	-0.102619	0.48653	-0.102336	0.372754	-0.121608	0.385786	-0.186191	0.426959
chaperone protein Skp (OmpH)	ZMO1147	ZMO1147	-0.0220388	0.980599	-0.0878855	0.62072	-0.214931	0.611367	0.146601	0.615752
YaeT-like component of outer membrane protein assembly complex	ZMO1148	ZMO1148	-0.225106	0.390201	-0.332595	0.0232308	-0.308058	0.188586	-0.197395	0.351778
membrane-associated Zn-dependent metalloprotease	ZMO1149	ZMO1149	-0.146737	0.820023	-0.0249176	0.803531	-0.0630004	0.885743	-0.176938	0.360625
1-deoxy-D-xylulose 5-phosphate reductoisomerase	dxr	ZMO1150	-0.034214	0.778421	-0.0724532	0.368846	-0.0960089	0.687848	-0.0232182	0.963923
phosphatidate cytidylyltransferase	cdsA	ZMO1151	0.103462	0.847489	0.180489	0.534333	-0.0776609	0.876988	-0.200256	0.557471
undecaprenyl pyrophosphate synthase UppS	uppS	ZMO1152	0.0860113	0.904271	0.0619876	0.70702	0.0795727	0.81903	0.0502605	0.885433
ribosome recycling factor	frr	ZMO1153	0.252681	0.613666	0.0123208	0.945157	0.0388622	0.754905	-0.0663363	0.71519
uridylate kinase	pyrH	ZMO1154	0.11216	0.818806	-0.100761	0.371843	-0.186142	0.496504	0.00993093	0.981554
translation elongation factor Ts	tsf	ZMO1155	-0.072319	0.564709	0.0745583	0.224976	0.152392	0.198365	0.0783017	0.44599
ribosomal protein S2	rpsB	ZMO1156	0.0296071	0.822444	0.0788879	0.154565	0.142115	0.206178	0.173668	0.269372
aspartate racemase	asr	ZMO1158	0.182222	0.778228	0.158949	0.355686	0.061402	0.825917	0.0492687	0.894806
CDP-diacylglycerol--serine O-phosphatidyltransferase	pssA	ZMO1159	-0.0520884	0.958062	-0.13967	0.826893	0.130482	0.914139	-0.177789	0.681508
phosphatidylserine decarboxylase	psd	ZMO1160	0.0283229	0.908291	0.0921752	0.520835	0.116268	0.633635	0.029129	0.781993
histidine kinase	ZMO1162	ZMO1162	-0.100777	0.653498	-0.161718	0.279512	0.0515296	0.853192	-0.107469	0.346837
phosphate uptake regulator PhoU	phoU	ZMO1163	0.0971196	0.504839	0.261033	0.0827907	0.264278	0.283086	0.26608	0.166889
transcriptional regulator PhoB	phoB	ZMO1164	-0.0414085	0.818922	-0.0113462	0.947597	0.191186	0.222071	0.275302	0.180418
DNA recombination/repair protein RecA	recA	ZMO1166	-0.0293496	0.819697	-0.0565364	0.509519	0.0810318	0.56144	-0.0872917	0.334832
putative CocE/NonD family hydrolase	ZMO1167	ZMO1167	-0.226916	0.307469	-0.283841	0.0826517	-0.414855	0.200901	-0.466181	0.15507
BadF/BadG/BcrA/BcrD type ATPase	ZMO1169	ZMO1169	0.141314	0.658906	0.445873	0.746301	0.210285	0.553557	-0.0444419	0.850035
antibiotic biosynthesis monooxygenase	ZMO1170	ZMO1170	-0.0586255	0.714726	0.20481	0.266821	0.116879	0.745421	0.215357	0.42041
beta-N-acetylhexosaminidase	ZMO1171	ZMO1171	-0.0111434	0.98112	0.195762	0.0849945	0.247159	0.160786	0.316609	0.234475
succinylarginine dihydrolase	astB	ZMO1172	0.0616468	0.8611	0.206298	0.0792973	0.0761153	0.280517	0.0176805	0.905484
DUF490 domain-containing protein	ZMO1173	ZMO1173	-0.331406	0.036	-0.251902	0.0396279	-0.14889	0.530378	-0.287622	0.174566
surface antigen (D15)	ZMO1174	ZMO1174	-0.757961	0.0676279	-0.761464	0.104053	-0.707008	0.176032	-0.951803	0.143534
histidine kinase	ZMO1176	ZMO1176	0.222635	0.618015	0.573855	0.0870051	0.359843	0.430389	0.347634	0.233611
winged helix family two component transcriptional regulator	ZMO1177	ZMO1177	0.323322	0.120625	0.299223	0.0472661	0.311962	0.209028	0.389803	0.1664
phosphoribosyl-AMP cyclohydrolase	hisI	ZMO1178	0.144602	0.602558	0.307235	0.0820476	0.272174	0.204021	0.350826	0.331933
(uracil-5)-methyltransferase	ygcA	ZMO1179	0.0567417	0.861398	0.0441786	0.660181	0.201901	0.327728	0.246997	0.228457
bifunctional ADP-dependent NAD(P)H-hydrate dehydratase/NAD(P)H-hydrate epimerase	ZMO1180	ZMO1180	0.131433	0.562256	0.112579	0.13136	0.201515	0.27185	0.165709	0.15712
N-formylglutamate amidohydrolase	hutG1	ZMO1181	0.479471	0.158542	0.2775	0.197584	0.363501	0.235323	0.0620778	0.777257
4-diphosphocytidyl-2C-methyl-D-erythritol kinase	ispE	ZMO1182	-0.047582	0.798818	0.0109946	0.913678	-0.0563234	0.769427	0.0660458	0.291061
TPR repeat-containing protein	ZMO1183	ZMO1183	-0.177764	0.319804	-0.120972	0.243519	-0.105215	0.448369	-0.129745	0.531262
electron-transferring-flavoprotein dehydrogenase	fixC	ZMO1184	-0.22863	0.301615	-0.272314	0.0395385	-0.264648	0.122507	-0.0899893	0.584988
uracil-DNA glycosylase superfamily protein	ZMO1185	ZMO1185	-0.280198	0.230177	0.0361156	0.858875	0.052578	0.842093	0.101032	0.616756
lytic transglycosylase	mltB	ZMO1186	-0.365341	0.156675	-0.450994	0.0400941	0.419668	0.23113	0.392568	0.394825
formamidopyrimidine-DNA glycosylase	mutM	ZMO1187	0.102792	0.624164	0.236071	0.146442	0.269298	0.233902	0.137379	0.441239
ubiquinone/menaquinone biosynthesis C-methyltransferase UbiE	ubiE	ZMO1188	0.0734418	0.817435	0.0511189	0.167207	0.203394	0.43506	0.105153	0.523148
2-octaprenylphenol hydroxylase UbiB	ubiB1	ZMO1189	0.00948207	0.991354	0.0214456	0.881511	0.185317	0.363359	0.0791855	0.772847
bifunctional phosphopantothenoylcysteine decarboxylase/phosphopantothenate--cysteine ligase	dfp	ZMO1190	-0.0726337	0.596172	-0.066562	0.117056	0.0241178	0.870849	0.0704257	0.406878
deoxyuridine 5'-triphosphate nucleotidohydrolase Dut	dut	ZMO1191	0.46333	0.403252	-0.0478439	0.894	-0.266078	0.468719	-0.201049	0.453305
ThiF/MoeB/HesA/family domain-containing protein	thiF	ZMO1192	0.0448869	0.735617	-0.0322456	0.644705	0.0702902	0.343332	0.128287	0.522403
DNA topoisomerase I	topA	ZMO1193	0.248539	0.534881	0.165471	0.107459	0.0994848	0.355581	0.116734	0.204884
DNA protecting protein DprA	dprA	ZMO1194	0.112918	0.603237	-0.0123393	0.913717	0.133146	0.395556	0.229367	0.145659
glycerol-3-phosphate acyltransferase PlsY	plsY	ZMO1195	0.264476	0.778738	0.313972	0.567413	0.018315	0.985839	0.221277	0.652626
major facilitator superfamily transporter	ZMO1196	ZMO1196	0.515116	0.195433	1.09352	0.08824	0	1	0.349145	0.583265
glutamate racemase	murI	ZMO1197	-0.01636	0.986962	-0.102582	0.345535	-0.116041	0.482379	-0.118121	0.74345
5-aminolevulinic acid synthase	hemA	ZMO1198	-0.595654	0.05825	-0.0944812	0.733971	-0.00292969	0.994755	0.0794379	0.814846
ribose 5-phosphate isomerase B	rpiB	ZMO1200	-0.00743548	0.997181	0.139174	0.131288	-0.0204137	0.926918	0.244921	0.258357
glycine hydroxymethyltransferase	glyA	ZMO1201	0.0677732	0.808781	-0.0467669	0.729909	-0.071256	0.668314	-0.126731	0.663298
transcriptional regulator NrdR	nrdR	ZMO1202	0.103609	0.585523	-0.00661659	0.954766	0.0311387	0.820883	0.168776	0.258544
TrmH family RNA methyltransferase	trmH	ZMO1203	-0.180379	0.607471	0.0792681	0.714149	0.327951	0.10525	0.220194	0.394509
LysR family transcriptional regulator	ZMO1206	ZMO1206	0.226996	0.957456	-0.459376	0.79626	0.268414	0.890555	-0.278446	0.848137
carbon-nitrogen hydrolase	ZMO1207	ZMO1207	0.539525	0.284447	0.257068	0.109707	0.191842	0.332658	0.310589	0.321685
potassium transporter Kup	kup	ZMO1209	-0.167218	0.619572	-0.161222	0.315885	-0.00993093	0.983209	-0.146192	0.398107
glutathione reductase	gor	ZMO1211	0.530376	0.371809	0.262658	0.170058	0.232732	0.332214	0.422965	0.155506
glucose-6-phosphate isomerase	pgi	ZMO1212	0.18365	0.388798	0.182236	0.0481495	0.135309	0.265329	0.0735372	0.735433
hypothetical protein	ZMO1213	ZMO1213	0	1	0.621194	0.424095	-0.495137	0.746141	0	1
putative DEAD/DEAH box helicase	ZMO1214	ZMO1214	0.0655142	0.860703	-0.120776	0.308822	-0.130931	0.104933	-0.201724	0.299661
hypothetical protein	ZMO1215	ZMO1215	-0.0741673	0.953385	-0.206972	0.874345	-0.227591	0.802458	-0.258741	0.830712
signal transduction histidine kinase	ZMO1216	ZMO1216	-0.197638	0.369926	-0.0863546	0.537814	-9.53674e-05	0.999344	0.00362015	0.993312
twin-arginine translocase subunit TatB	tatB	ZMO1219	1.03038	0.51274	0.112186	0.762449	-0.430618	0.667343	-0.173223	0.542599
twin-arginine translocase subunit TatA	tatA	ZMO1220	-0.369038	0.188143	-0.240382	0.190466	-0.0718892	0.826309	0.000218709	0.998573
conserved hypothetical protein	ZMO1221	ZMO1221	-0.237268	0.217706	-0.460567	0.061541	-0.156966	0.688436	-0.257823	0.394512
3-oxoacyl-(acyl-carrier-protein) reductase	ZMO1222	ZMO1222	0.0267239	0.982716	0.0594699	0.403133	0.0712713	0.482331	0.182916	0.15361
malonyl CoA-acyl carrier protein transacylase	fabD	ZMO1223	0.0403773	0.904538	-0.0286649	0.893166	-0.0873686	0.741823	-0.0117982	0.966313
ribosomal protein S6	rpsF	ZMO1225	-0.00333277	0.999797	0.172187	0.0838161	0.215476	0.246914	0.192895	0.31674
ribosomal protein S18	rpsR	ZMO1226	0.122892	0.757039	0.148995	0.487996	0.117699	0.606272	0.187066	0.509752
ribosomal protein L9	rplI	ZMO1227	0.115156	0.693303	0.0916303	0.151457	0.0658048	0.386432	0.102804	0.364048
mandelate racemase/muconate lactonizing protein	ykfB	ZMO1228	-0.183756	0.36241	-0.112764	0.493677	-0.105711	0.658198	-0.157077	0.661169
GTP cyclohydrolase I FolE	folE	ZMO1229	0.256621	0.629217	-0.186653	0.171187	-0.0337505	0.931501	-0.102259	0.703253
single-stranded-DNA-specific exonuclease RecJ	recJ	ZMO1231	0.172925	0.591147	0.00943311	0.95996	0.0532449	0.855772	0.196809	0.522369
glycosyl transferase family 1	ZMO1232	ZMO1232	0.0412814	0.954028	-0.176964	0.400117	0.0400766	0.828721	-0.0942396	0.651452
mannose-1-phosphate guanyltransferase CpsB	cpsB	ZMO1233	0.00946744	0.986226	-0.0209529	0.923891	0.139628	0.186	0.052693	0.441822
deoxyxylulose-5-phosphate synthase	dxs1	ZMO1234	-0.121781	0.73556	-0.461199	0.0860652	0.0112635	0.934838	-0.149024	0.861856
Fur family ferric uptake regulator	ZMO1235	ZMO1235	0.101835	0.822002	0.241716	0.16697	0.269838	0.102866	-0.239878	0.356364
Zn-dependent alcohol dehydrogenase	adhA	ZMO1236	0.447035	0.0313043	0.570016	0	0.338852	0.100966	0.236444	0.309006
lactate dehydrogenase	ldhA	ZMO1237;b3561	-0.2097	0.743563	-0.373842	0.116443	0.369495	0.391351	-0.924765	0.603468
2,3-bisphosphoglycerate-dependent phosphoglycerate mutase	gpmA	ZMO1240	0.178809	0.190053	0.268574	0.03968	0.230067	0.200124	0.154489	0.576887
peptidase M14 carboxypeptidase A	ZMO1242	ZMO1242	0.110285	0.743598	-0.101576	0.256518	-0.0141595	0.842795	-0.0748749	0.642022
conserved hypothetical protein	ZMO1243	ZMO1243	0.110712	0.888323	-0.0825812	0.611354	-0.0738335	0.85576	-0.508463	0.393638
hypothetical protein	ZMO1248	ZMO1248	-0.155469	0.826737	-0.0259113	0.970538	0.295785	0.491737	-0.261733	0.67817
hypothetical protein	ZMO1251	ZMO1251	0.715328	0.598237	-0.875272	0.368664	-0.76888	0.320637	-0.579965	0.29114
putative cytochrome c-type biogenesis protein CcmI/NrfG	ccmI	ZMO1252	0.268731	0.573752	-0.150219	0.166819	-0.0486584	0.912151	-0.384554	0.227405
thiol:disulfide oxidoreductase CcmG	ccmG	ZMO1254	-0.0315253	0.970574	-0.389044	0.1205	-0.343363	0.107228	-0.177729	0.375522
cytochrome c-type biogenesis protein CcmF/NfrE	ccmF	ZMO1255	0.187063	0.632559	-0.244212	0.310849	-0.15209	0.60001	-0.0202471	0.968464
cytochrome c-type biogenesis protein CcmE/CycJ	ccmE	ZMO1256	0.444114	0.550864	0.302953	0.224742	0.0462367	0.839722	0.0788701	0.808928
cytochrome C assembly protein CcmC/CycZ	ccmC	ZMO1258	-1.18769	0.039	0.766996	0.543445	0.215567	0.65204	-0.369706	0.623248
ABC transporter substrate-binding protein aliphatic sulfonates family SsuA	ssuA	ZMO1261	-0.895316	0.196645	-0.451223	0.0854043	-0.553939	0.204615	-0.855759	0.156057
L-alanine-DL-glutamate epimerase or related enzyme of enolase superfamily RspA	rspA	ZMO1264	-0.418973	0.187583	-0.374439	0.110145	-0.333509	0.205604	-0.333747	0.317574
DUF1847 domain-containing protein	ZMO1265	ZMO1265	-0.929889	0.0425455	-0.657442	0.11837	-0.373168	0.305612	-0.483695	0.369287
GMP synthase large subunit	guaA	ZMO1267	0.104424	0.672924	0.123314	0.211475	0.123095	0.37562	0.235289	0.232919
hypothetical protein	ZMO1268	ZMO1268	-0.0641384	0.506327	-0.179704	0.41969	-0.0942783	0.565992	-0.0397212	0.89662
8-amino-7-oxononanoate synthase	ZMO1270	ZMO1270	0.200615	0.632353	0.128915	0.12745	0.113536	0.606259	0.0299606	0.9325
siroheme synthase CysG	cysG2	ZMO1271	-0.320448	0.541461	-0.342032	0.117919	-0.519306	0.183222	-0.219653	0.232569
N-succinylglutamate 5-semialdehyde dehydrogenase	astD	ZMO1272	-0.497214	0.045	-0.502128	0.0837647	-0.461422	0.235701	-0.397659	0.248704
amidohydrolase	ZMO1273	ZMO1273	0.213924	0.533482	-0.121508	0.320428	-0.180054	0.386148	0.0476939	0.821292
threonine dehydratase	tdcB	ZMO1275	0.252314	0.326894	0.223173	0.0253333	0.284623	0.132866	0.255757	0.154526
hypothetical protein	ZMO1276	ZMO1276	-0.0110747	0.999111	-0.43337	0.43638	-0.489772	0.320794	-0.219346	0.535253
aminodeoxychorismate lyase	ZMO1277	ZMO1277	-0.196811	0.444716	-0.235082	0.145105	-0.107688	0.60002	-0.0832087	0.644903
3-oxoacyl-(acyl-carrier-protein) synthase 2	fabF	ZMO1278	-0.182088	0.49054	-0.215066	0.107506	-0.191446	0.315315	-0.104359	0.641125
acyl carrier protein	acpP	ZMO1279	-0.32353	0.631782	-0.0561886	0.920848	0.142232	0.684004	0.148052	0.772847
LacI family transcriptional regulator	ZMO1283	ZMO1283	-0.356047	0.323173	-0.152275	0.322965	-0.109966	0.604642	-0.0561282	0.568746
sorbitol dehydrogenase cytochrome c subunit	sldC	ZMO1284	-0.128867	0.461895	-0.0640507	0.757561	-0.0917047	0.713425	-0.251347	0.368028
solbitol dehydrogenase large subunit	sldL	ZMO1285	0.00494385	0.999249	-0.235676	0.182229	-0.153787	0.29562	-0.178644	0.324035
sorbitol dehydrogenase small subunit	sldS	ZMO1286	-0.0399462	0.988575	-0.228309	0.54505	-0.367245	0.564707	0.0380001	0.786864
putative UDP-glucose-glycogen glucosyltransferase	ZMO1287	ZMO1287	-0.0308005	0.955509	-0.174296	0.146297	-0.154559	0.201862	-0.0290947	0.925782
peptidase S10 serine carboxypeptidase	ZMO1291	ZMO1291	-0.56698	0.0738333	-0.497798	0.0401277	-0.676377	0.1	-0.602884	0.140267
N-acetylmuramic acid 6-phosphate etherase MurQ	murQ	ZMO1294	-0.182223	0.625494	-0.275532	0.00914286	-0.383844	0.132816	-0.133618	0.49121
organic radical activating enzyme	ZMO1295	ZMO1295	-0.273813	0.574716	-0.194626	0.489521	-0.0731411	0.855893	0.189839	0.159481
hypothetical protein	ZMO1296	ZMO1296	0	1	0	1	0	1	0	1
putative capsular polysaccharide biosynthesis protein BcbG	bcbG	ZMO1299	-0.289325	0.357895	-0.0613302	0.654849	-0.0041968	0.985927	-0.00417391	0.992492
putative capsular polysaccharide biosynthesis protein BcbE	bcbE	ZMO1300	-0.35449	0.15478	-0.349765	0.0902476	-0.161332	0.376198	-0.0867201	0.283638
hypothetical protein	ZMO1301	ZMO1301	0.494233	0.153721	0.509606	0.117843	0.546961	0.262482	0.578362	0.1408
lipoate-protein ligase B	lipB	ZMO1302	0.158784	0.623731	-0.0823491	0.508383	0.0224056	0.921646	-0.23258	0.456013
pyrroline-5-carboxylate reductase	proC2	ZMO1303	0.0123297	0.97964	0.137601	0.185023	-0.0729936	0.713459	0.0358734	0.851107
DUF1790 domain-containing protein	ZMO1304	ZMO1304	-0.118125	0.856456	-0.26039	0.336121	0.153833	0.703351	-0.0041434	0.993052
DUF526 domain-containing protein	ZMO1305	ZMO1305	0.159191	0.757695	0.0351473	0.929307	-0.0829983	0.860514	-0.0447655	0.94257
hemolysin A	ZMO1306	ZMO1306	-0.15933	0.637003	-0.0600802	0.795583	0.106214	0.440697	-0.0784416	0.708284
iron-dependent fumarate hydratase	fumA	ZMO1307	0.122985	0.318504	-0.0453459	0.854451	-0.0447769	0.896891	0.178281	0.239866
DNA polymerase III chi subunit HolC	holC	ZMO1308	-0.0623398	0.882613	0.187634	0.134	0.381856	0.13253	0.122018	0.700378
leucyl aminopeptidase	pepA2	ZMO1309	0.162824	0.372599	0.233068	0.111969	0.190187	0.228187	0.0694618	0.702092
organic solvent tolerance protein	ostA	ZMO1311	-0.0295124	0.979904	-0.303508	0.00673684	-0.311912	0.38231	-0.229012	0.260015
PpiC-type peptidyl-prolyl cis-trans isomerase	ZMO1312	ZMO1312	-0.00525475	0.997719	-0.09423	0.354511	-0.0566228	0.80158	-0.132442	0.709542
4-hydroxythreonine-4-phosphate dehydrogenase	pdxA	ZMO1313	-0.0355333	0.896621	-0.0299174	0.854473	-0.105764	0.509713	-0.18288	0.406394
16S ribosomal RNA methyltransferase KsgA/Dim1 family protein	ksgA	ZMO1314	-0.0292098	0.938021	-0.0206337	0.924735	0.0756092	0.605525	0.0117537	0.979261
hypothetical protein	ZMO1315	ZMO1315	0.199071	0.365268	0.144835	0.226142	0.150857	0.38902	0.153529	0.323544
polysaccharide biosynthesis protein	ZMO1316	ZMO1316	0.476004	0.670117	1.71204	0.259478	0.694918	0.524872	0.362173	0.364119
conserved hypothetical protein	ZMO1317	ZMO1317	0.180115	0.469125	0.00623512	0.981334	-0.0320822	0.884879	0.191598	0.423883
putative P-loop containing nucleoside triphosphate hydrolase	ZMO1318	ZMO1318	-0.00627454	0.992061	-0.0178668	0.919779	0.0341682	0.883312	0.0446301	0.855051
hypothetical protein	ZMO1319	ZMO1319	-0.176627	0.587927	-0.113129	0.587944	-0.312147	0.252186	-0.159253	0.64004
16S rRNA C967 or C1407 C5-methylase RsmB/RsmF family	ZMO1320	ZMO1320	-0.0773773	0.895549	-0.137693	0.387528	-0.111136	0.7033	0.0273018	0.855297
inosine-5'-monophosphate dehydrogenase	guaB	ZMO1321	-0.0713043	0.777298	-0.0465864	0.484481	-0.0162964	0.918255	-0.000696818	0.997119
winged helix family two component transcriptional regulator	chvI	ZMO1322	0.289814	0.303664	0.152266	0.438296	0.357756	0.30313	0.261507	0.355427
histidine kinase	chvG	ZMO1323	0.106852	0.358519	0.0514946	0.55271	0.121283	0.562021	0.0818939	0.439135
HPr kinase	ZMO1324	ZMO1324	-0.145879	0.821301	0.00799561	0.982169	-0.165922	0.438056	-0.0196273	0.968327
glmZ(sRNA)-inactivating NTPase	ZMO1325	ZMO1325	0.127724	0.613193	0.0883052	0.377411	0.115492	0.448868	0.390996	0.153217
PTS system fructose subfamily IIA component	nagE	ZMO1326	0.0823053	0.911412	-0.062013	0.750025	0.151486	0.250395	0.247349	0.439489
HPr family phosphocarrier	ZMO1327	ZMO1327	0.1692	0.492294	0.220796	0.56286	0.277473	0.66174	0.240498	0.437965
SpoU type tRNA/rRNA methyltransferase	ZMO1328	ZMO1328	0.16906	0.55015	0.232381	0.0788169	0.258929	0.197898	0.306213	0.204713
NAD(+) kinase	ppnK	ZMO1329	-0.16713	0.632769	-0.0605558	0.468586	-0.0459785	0.85553	-0.0460186	0.354133
mechanosensitive ion channel MscS	mscS2	ZMO1331	0.111762	0.72763	-0.068943	0.474703	0.0562935	0.855827	-0.0573394	0.757159
polyisoprenoid-binding periplasmic YceI-like protein	ZMO1334	ZMO1334	0.871091	0.122774	0.687808	0.120594	0.532183	0.236016	0.658288	0.259924
flavoprotein WrbA	wrbA	ZMO1335	0.623915	0.0908276	0.411127	0.110921	0.0988636	0.64557	0.0973015	0.802594
LysR family transcriptional regulator	ZMO1336	ZMO1336	0.227596	0.491373	0.125037	0.672014	0.217333	0.443754	0.0618318	0.797837
hydroquinone detoxification protein	ZMO1337	ZMO1337	-0.486096	0.656399	0.7093	0.110117	0.177663	0.819895	0.345614	0.626587
Zn-dependent metalloprotease	ZMO1341	ZMO1341	0.199735	0.662435	-0.000890096	0.998348	-0.00582314	0.991038	-0.0953999	0.374693
2,5-diketo-D-gluconate reductase A	dkgA	ZMO1344	0.277737	0.583391	0.194459	0.184958	0.109067	0.624513	0.124589	0.641259
aminopeptidase N	pepN1	ZMO1345	0.0457694	0.818128	-0.102189	0.0277288	-0.112843	0.344416	-0.184535	0.445302
threonine aldolase	ltaE	ZMO1347	0.490447	0.164162	0.386437	0.0405714	0.242746	0.101681	0.108101	0.681143
type I methionine aminopeptidase	map	ZMO1348	0.177359	0.322534	0.189739	0.169826	0.0497386	0.829859	0.106497	0.703992
putative nucleotide-utilizing enzyme	ZMO1350	ZMO1350	0.0993582	0.630741	0.355571	0.0487129	0.259479	0.103094	0.430162	0.187704
carboxymethylenebutenolidase clcD	clcD1	ZMO1351	0.145381	0.436951	0.187763	0.080327	0.227563	0.179212	0.288622	0.489616
intergral membrane protein	ZMO1352	ZMO1352	0.012633	0.997629	-0.19054	0.48796	-0.129311	0.806535	-0.431248	0.311436
DUF336 domain-containing protein	ZMO1353	ZMO1353	0.197208	0.397267	0.246807	0.18127	0.231538	0.234806	0.256313	0.243602
flagellar motor protein MotB	motB3	ZMO1354	0.037665	0.907515	0.0127487	0.947252	0.0904414	0.752175	-0.0129801	0.88412
ABC transporter related protein	ZMO1355	ZMO1355	0.0576363	0.779563	-0.124643	0.195886	-0.0215804	0.77019	-0.117034	0.485844
chromosomal replication initiator protein DnaA	dnaA	ZMO1356	-0.16665	0.73363	-0.266291	0.297516	-0.188669	0.298144	-0.198664	0.623436
ribosomal protein S20	rpsT	ZMO1358	0.0465794	0.961527	0.0101236	0.971317	0.139722	0.567103	-0.00721105	0.986165
pyruvate decarboxylase	pdc	ZMO1360	0.158564	0.439879	0.177221	0.0794207	0.140176	0.285017	0.0204404	0.947817
coproporphyrinogen III oxidase	hemN2	ZMO1364	-0.226427	0.131818	-0.177582	0.0477091	-0.0645777	0.683884	0.0300407	0.89663
diguanylate cyclase with beta propeller sensor	ZMO1365	ZMO1365	0.19117	0.256259	0.168772	0.246111	0.17676	0.438095	0.155323	0.359581
30S ribosomal protein S4	rpsD	ZMO1366	0.0676867	0.817149	0.0242386	0.825683	0.153308	0.390164	0.0402641	0.712318
agmatine deiminase	ZMO1369	ZMO1369	0.0120392	0.980754	-0.157979	0.228479	-0.118682	0.374932	-0.201839	0.367626
N-carbamoylputrescine amidase	ZMO1370	ZMO1370	-0.0266457	0.972646	-0.0681273	0.731679	-0.0103734	0.959161	-0.104862	0.449099
short-chain dehydrogenase/reductase SDR	ZMO1372	ZMO1372	0.07805	0.923268	-0.0470079	0.926207	-0.180452	0.775626	-0.112378	0.837168
conserved hypothetical protein	ZMO1373	ZMO1373	0.0476659	0.949868	0.177871	0.147152	0.0892779	0.821572	-0.0353654	0.964283
NAD-dependent epimerase/dehydratase	ZMO1374	ZMO1374	0.188261	0.566667	0.310495	0.137607	0.247105	0.448685	0.23446	0.165865
ribonuclease III	rnc	ZMO1375	0.0642624	0.916948	0.212706	0.309601	0.258151	0.234317	0.131009	0.571568
AraC family transcriptional regulator	ZMO1380	ZMO1380	-0.112977	0.958336	-0.68024	0.0780645	0.874883	0.300105	0.409301	0.68386
GTP-binding protein Era	era	ZMO1384	-0.0212911	0.905674	0.183833	0.133021	0.140263	0.234378	0.260087	0.156
toxic anion resistance family protein	ZMO1385	ZMO1385	-0.154654	0.61758	0.128409	0.299609	-0.0348841	0.909353	0.131547	0.794803
conserved hypothetical protein	ZMO1386	ZMO1386	-0.0386333	0.951202	0.0942097	0.387775	0.117219	0.669797	0.0509987	0.837736
winged helix family two component transcriptional regulator	ZMO1387	ZMO1387	-0.0252539	0.960646	0.0296707	0.913198	0.0879415	0.727139	0.0959918	0.740099
gamma-glutamyltransferase	ggt	ZMO1388	-0.385173	0.190582	-0.552258	0.0251667	-0.40737	0.193647	-0.515649	0.268403
Thiol:disulfide interchange protein DsbD	dsbD	ZMO1389	-0.210158	0.409473	-0.194025	0.109703	-0.259329	0.429397	-0.336047	0.266979
conserved hypothetical protein	ZMO1390	ZMO1390	-0.105976	0.720984	0.158878	0.412884	0.0929941	0.829439	0.286843	0.648432
diacylglycerol kinase catalytic region	ZMO1391	ZMO1391	-0.0172335	0.989438	0.0154858	0.962603	0.150066	0.448696	0.0646845	0.634931
conserved hypothetical protein	ZMO1392	ZMO1392	0.330635	0.538558	0.217609	0.133006	0.114362	0.492507	-0.0448284	0.949469
LPS export ABC transporter permease LptF	lptF	ZMO1393	-0.00153732	1	-0.209431	0.572195	-0.225489	0.459119	-0.237806	0.479006
LPS export ABC transporter permease LptG	lptG	ZMO1394	-0.458989	0.430446	-0.0869929	0.794838	-0.0732307	0.84273	-0.143888	0.3569
N-formylglutamate amidohydrolase	hutG2	ZMO1395	-0.162404	0.910196	0.135681	0.881503	0.214663	0.757115	0.0266698	0.94639
conserved hypothetical protein	ZMO1396	ZMO1396	-0.100725	0.755558	-0.324402	0.158998	0.113132	0.829311	0.674379	0.354504
fatty acid hydroxylase	ZMO1399	ZMO1399	0.53337	0.398258	0.599185	0.105897	0.729085	0.23405	0.578705	0.136364
conserved hypothetical protein	ZMO1400	ZMO1400	0.680703	0.03744	0.399797	0.0260408	0.33875	0.100722	0.417899	0.19776
exodeoxyribonuclease III XthA	xthA1	ZMO1401	0.125863	0.691564	-0.0167211	0.899861	-0.0503909	0.669937	-0.0763563	0.808047
iron-sulfur cluster assembly accessory protein	ZMO1402	ZMO1402	0.569247	0.767651	0.399782	0.603972	-0.0229874	0.986399	-0.210444	0.831238
peptidase M23	ZMO1403	ZMO1403	-0.211912	0.882654	-0.869417	0.0246667	0.870719	0.669615	0.713374	0.617958
DNA-directed RNA polymerase specialized sigma subunit sigma 24 (sigma E) family RpoE	rpoE	ZMO1404	0.110081	0.81722	-0.169523	0.145362	-0.0512238	0.747878	-0.00639915	0.962541
two-component response regulator	ZMO1405	ZMO1405	-0.0757834	0.879262	0.0315495	0.904796	-0.0974553	0.715755	0.179953	0.420964
alpha/beta hydrolase fold protein	ZMO1406	ZMO1406	-0.0159582	0.952566	0.026324	0.916073	0.14901	0.29339	0.117296	0.623602
aspartate-semialdehyde dehydrogenase	asd	ZMO1407	0.359512	0.341956	0.162716	0.201984	0.0393537	0.864228	0.0696945	0.819635
S9 family peptidase	pepX	ZMO1408	-1.00776	0.0216	-1.10974	0.00711111	-1.12462	0.0337143	-0.989876	0
inositol monophosphatase	cbbF2	ZMO1409	0.0828298	0.450609	0.0545559	0.378394	0.0811291	0.633432	0.102262	0.641168
bacterioferritin	bfr1	ZMO1410	0.424927	0.304582	0.377917	0.0266462	0.288661	0.149345	0.337816	0.200105
ferric uptake regulator Fur family	fur	ZMO1411	0.0983849	0.735563	0.0114199	0.904041	-0.0230961	0.690548	-0.0187823	0.942578
transcriptional regulator MucR family	ZMO1412	ZMO1412	0.255366	0.609609	0.156121	0.225812	-0.200842	0.496764	0.0120506	0.980466
ribosomal-protein-alanine N-acetyltransferase	ZMO1413	ZMO1413	-0.249356	0.902736	-0.152101	0.716747	0.153741	0.624933	-0.0519581	0.949276
tRNA(adenosine(37)-N6)-threonylcarbamoyltransferase complex dimerization subunit type 1 TsaB	ZMO1414	ZMO1414	-0.0520693	0.954265	0.216476	0.235247	0.17103	0.176806	0.0989215	0.571006
Nfu/NifU-like scaffold protein	ZMO1415	ZMO1415	0.190872	0.281397	0.201452	0.0272836	0.127754	0.334154	-0.0286331	0.803361
putative DEAD/DEAH box helicase	ZMO1417	ZMO1417	-0.0881627	0.839084	-0.16603	0.110642	0.467875	0.130933	0.449287	0.141964
4-hydroxybenzoate polyprenyl transferase UbiA	ubiA	ZMO1419	-0.247259	0.892309	0	1	0	1	0	1
5-(carboxyamino)imidazole ribonucleotide mutase PurE	purE	ZMO1420	-0.35304	0.460138	-0.185766	0.242755	-0.277967	0.298268	-0.207937	0.292481
phosphoribosylaminoimidazole carboxylase ATPase subunit PurK	purK	ZMO1421	-0.0514857	0.844154	-0.0491098	0.659639	-0.113105	0.237566	-0.158166	0.171535
peptidase M16 domain protein	ZMO1422	ZMO1422	-0.387498	0.139787	-0.460198	0.0214359	-0.532342	0.12595	-0.488725	0.316488
peptidase M16 domain protein	ZMO1423	ZMO1423	-0.277165	0.304541	-0.300581	0.02416	-0.378308	0.191063	-0.318525	0.396917
ATP-dependent chaperone ClpB	clpB	ZMO1424	0.109149	0.639371	0.276484	0.126646	0.128511	0.363139	-0.012057	0.943248
thiamine monophosphate synthase	thiE2	ZMO1425	1.08868	0.69157	0.497814	0.718378	0.580695	0.805811	0.0261116	0.990255
DNA repair protein RadC	ZMO1426	ZMO1426	1.23615	0.241475	-0.445572	0.667408	0	1	1.29452	0.231342
diacylglycerol kinase catalytic region	ZMO1428	ZMO1428	-0.0276413	0.982815	-0.102636	0.835866	-0.107583	0.830314	-0.0140839	0.981104
NodT family RND efflux system outer membrane lipoprotein	ZMO1429	ZMO1429	0.234652	0.550451	0.0129191	0.959775	-0.0713838	0.842145	0.0674928	0.808993
MFP subunit of RND efflux system transporter	ZMO1430	ZMO1430	0.000132879	0.999974	0.0258808	0.924729	-0.033884	0.892425	-0.0071125	0.984881
membrane protein component of efflux system	ZMO1432	ZMO1432	0.0985966	0.630402	0.0485922	0.87309	0.287304	0.206235	0.277653	0.362985
DNA polymerase III delta subunit	holA	ZMO1433	0.102213	0.94963	0.0227445	0.939059	0.086621	0.820255	0.0141818	0.984345
hypothetical protein	ZMO1434	ZMO1434	-0.196393	0.383662	-0.163328	0.26639	-0.221212	0.440149	-0.233517	0.298193
leucyl-tRNA synthetase	leuS	ZMO1435	-0.0210152	0.858828	-0.0873311	0.289856	-0.0187937	0.894566	-0.0375207	0.80539
conserved hypothetical protein	ZMO1436	ZMO1436	-0.0797475	0.670645	-0.16367	0.18239	-0.158017	0.496011	-0.242557	0.14785
AsnC family transcriptional regulator	ZMO1438	ZMO1438	-0.208076	0.889133	-0.82328	0.26673	0.243205	0.680685	0.398932	0.631735
carbon-nitrogen hydrolase	ZMO1439	ZMO1439	-0.0964883	0.777884	0.00235367	0.993148	-0.0713266	0.649142	-0.0429815	0.491076
hypothetical protein	ZMO1440	ZMO1440	-0.0381603	0.988984	-0.0815328	0.826508	0.125624	0.882384	-0.117706	0.977883
FAD dependent oxidoreductase	ZMO1441	ZMO1441	0.361965	0.270651	0.275708	0.117189	0.396626	0.091619	0.457249	0.160279
conserved hypothetical protein	ZMO1442	ZMO1442	0.112061	0.614634	-0.00486946	0.982636	-0.115238	0.519659	0.0602036	0.848536
glycine--tRNA ligase subunit beta	glyS	ZMO1444	0.0577583	0.635587	0.0407365	0.594619	0.180155	0.286176	0.0809148	0.448131
glycine--tRNA ligase subunit alpha	glyQ	ZMO1446	0.209119	0.513882	0.0172831	0.936943	0.0824604	0.534253	0.229081	0.448995
conjugative transfer protein GumN	ZMO1447	ZMO1447	0.0280145	0.951913	0.00148837	0.997726	-0.249974	0.579039	-0.472055	0.747314
hypothetical protein	ZMO1448	ZMO1448	-0.267951	0.82118	0.0119724	0.981055	0.0455405	0.883651	-0.205361	0.54013
mannitol-1-phosphate dehydrogenase	mtlD	ZMO1449	0.490528	0.242872	0.547315	0.110047	0.492138	0.151887	0.592834	0.138643
deoxyribodipyrimidine photo-lyase	phrB	ZMO1450	0.0141284	0.987427	0.103694	0.66585	0.0938346	0.440553	0.0754445	0.585154
purine nucleoside permease	ZMO1451	ZMO1451	-0.200768	0.302932	-0.312776	0.0812364	-0.202414	0.286314	-0.146121	0.63878
resolvase domain-containing protein	ZMO1455	ZMO1455	-0.0088164	0.990511	0.0473372	0.665947	0.112686	0.532302	0.144917	0.286697
LysE family translocator	ZMO1456	ZMO1456	-0.109453	0.969948	0	1	0	1	0	1
3-mercaptopyruvate sulfurtransferase	sseA	ZMO1460	-0.0995496	0.674816	0.107924	0.336072	0.221816	0.1844	0.231552	0.396503
aminoglycoside phosphotransferase	ZMO1461	ZMO1461	-0.145895	0.861274	-0.0758616	0.621013	-0.182497	0.518938	0.0652822	0.801852
NMT1/THI5 like domain protein	ZMO1462	ZMO1462	0.020682	0.937328	-0.260756	0.076227	-0.252335	0.25272	-0.352655	0.21351
TonB-dependent receptor	ZMO1463	ZMO1463	-0.719561	0.584754	0.891443	0.424625	0.593735	0.757253	0.587687	0.706999
putative amino acid permease	ZMO1465	ZMO1465	0.0371609	0.98227	-0.093125	0.546873	-0.256701	0.43091	0.0194829	0.9555
putative alpha/beta hydrolase	ZMO1466	ZMO1466	-0.386435	0.16	-0.114117	0.292947	-0.231123	0.28611	-0.389265	0.150242
ABC-2 type transporter	ZMO1467	ZMO1467	0.0164992	0.993877	0.186668	0.87698	-0.121522	0.899448	0.421194	0.70281
hypothetical protein	ZMO1468	ZMO1468	-0.251556	0.30325	-0.113642	0.193556	-0.0614154	0.858963	-0.0381864	0.933613
GTP-binding protein TypA/BipA	typA	ZMO1471	-0.0582275	0.861537	-0.0458717	0.566776	0.024203	0.754137	-0.0428225	0.396592
hypothetical protein	ZMO1473	ZMO1473	-0.0332336	0.974194	0.156171	0.37415	0.164171	0.602819	-0.156654	0.553772
TonB-dependent receptor plug domain	ZMO1475	ZMO1475	-1.02224	0.0649412	-2.07812	0.102684	-1.62054	0.218655	-1.7566	0.199855
hypothetical protein	ZMO1476	ZMO1476	-0.398483	0.571818	-0.17192	0.55745	-0.0969957	0.870125	0.0599511	0.819633
hypothetical protein	ZMO1477	ZMO1477	0.017779	0.986587	0.0310586	0.853967	-0.123437	0.818368	0.232566	0.200126
6-phosphogluconolactonase	pgl	ZMO1478	0.490449	0.182731	0.364634	0.0397053	0.223376	0.44029	0.194355	0.642834
electron transfer flavoprotein subunit alpha	etfA	ZMO1479	0.0763321	0.911841	0.197292	0.175523	0.139734	0.410674	0.215799	0.251794
electron transfer flavoprotein subunit beta	etfB	ZMO1480	0.214451	0.24994	0.109777	0.341975	0.0707766	0.562013	0.140254	0.287497
succinyl-CoA ligase subunit beta	sucC	ZMO1481	-0.0449206	0.755883	-0.0474396	0.555225	0.0465387	0.714363	0.11301	0.366664
UvrD/REP helicase	ZMO1484	ZMO1484	0.00380834	0.987413	0.0082709	0.780836	0.0733687	0.81994	-0.0273005	0.93021
deoxyguanosinetriphosphate triphosphohydrolase	ZMO1485	ZMO1485	0.23015	0.242177	0.213349	0.198851	0.167666	0.492945	-0.00350444	0.981984
2-dehydro-3-deoxyphosphooctonate aldolase	kdsA	ZMO1488	-0.178609	0.773588	-0.0893211	0.51359	-0.122565	0.562343	-0.175174	0.498175
3-deoxy-D-manno-octulosonate cytidylyltransferase	kdsB	ZMO1489	-0.349325	0.165155	-0.239269	0.118773	-0.175676	0.225906	-0.287724	0.163975
putative outer membrane associated protein	ZMO1490	ZMO1490	0.0347379	0.803476	0.0456607	0.352181	0.0165393	0.957456	0.010203	0.933932
hypothetical protein	ZMO1491	ZMO1491	0.000775655	1	0.0130806	0.951916	-0.0581652	0.787337	0.004776	0.979437
acetylglutamate kinase	argB	ZMO1494	0.02152	0.888202	0.110519	0.354828	0.0987218	0.609329	0.0314846	0.934685
ATP/cobalamin adenosyltransferase	ZMO1495	ZMO1495	0.217886	0.537788	-0.174907	0.44271	-0.139344	0.539029	-0.0578156	0.761254
phosphoenolpyruvate carboxylase	ppc	ZMO1496	0.332681	0.229352	0.331724	0.02768	0.379075	0.102348	0.451674	0.141929
amino acid/polyamine transporter	ZMO1497	ZMO1497	-0.185273	0.866482	0.637911	0.571089	-0.0481485	0.957614	0.583134	0.363348
diadenosine tetraphosphate hydrolase	apaH1	ZMO1498	0.063989	0.878515	-0.193452	0.184979	-0.0872148	0.769503	-0.0473798	0.618765
phosphoribosyl-ATP pyrophosphatase	hisE	ZMO1499	-0.122773	0.813574	-0.0286458	0.909131	-0.108128	0.828163	-0.0518538	0.779834
imidazole glycerol phosphate synthase cyclase subunit	hisF	ZMO1500	-0.131554	0.640842	0.103137	0.639551	0.23185	0.398958	0.207589	0.356147
1-(5-phosphoribosyl)-5-[(5-phosphoribosylamino)methylideneamino] imidazole-4-carboxamide isomerase	hisA	ZMO1501	0.0730508	0.672516	0.0429522	0.4198	0.00400925	0.988344	0.0934785	0.702401
imidazole glycerol phosphate synthase subunit HisH	hisH	ZMO1502	-0.114608	0.721155	-0.239222	0.19985	0.101362	0.770639	0.132873	0.60028
Imidazoleglycerol-phosphate dehydratase	hisB	ZMO1503	-0.036452	0.721802	0.353906	0.0791592	0.111681	0.759813	0.508596	0.290195
DUF1321 domain-containing protein	ZMO1504	ZMO1504	0.0340964	0.953462	0.281752	0.087449	0.263054	0.152216	0.427396	0.155556
hypothetical protein	ZMO1506	ZMO1506	-0.0202948	0.983841	-0.119363	0.56148	-0.0976442	0.76983	0.245332	0.427302
inorganic diphosphatase	ppa	ZMO1507	0.0557206	0.730092	0.0631472	0.513488	0.0350501	0.863405	-0.0451158	0.890607
histidine--tRNA ligase	hisS	ZMO1508	0.0160294	0.964816	0.00488599	0.970494	-0.0022227	0.99339	-0.0590521	0.797159
peptide chain release factor 1	prfA	ZMO1509	0.0232016	0.980729	0.0274976	0.902911	0.104683	0.33336	0.0782356	0.503884
protein-(glutamine-N5) methyltransferase release factor-specific	prmC	ZMO1510	-0.0110633	0.989645	0.284598	0.146386	0.340118	0.359615	0.0240885	0.945454
conserved hypothetical protein	ZMO1511	ZMO1511	0.00121435	1	-0.276225	0.171175	-0.0593128	0.75709	-0.261422	0.33444
ABC transporter related protein	ZMO1512	ZMO1512	0.0183303	0.985789	0.212788	0.452307	0.051403	0.818656	0.207378	0.646229
phenylalanine--tRNA ligase subunit beta	pheT	ZMO1513	0.0270653	0.846913	0.0234782	0.679946	0.0858733	0.467818	0.0402171	0.757935
phenylalanine--tRNA ligase subunit alpha	pheS	ZMO1514	0.130883	0.461198	0.137376	0.315937	0.00413386	0.986226	0.173362	0.367073
ribosomal protein L20	rplT	ZMO1515	-0.119424	0.857198	0.154525	0.230312	0.288397	0.274654	0.136943	0.55034
ribosomal protein L35	rpmI	ZMO1516	0.2025	0.757679	0.0383396	0.919238	0.217863	0.688333	-0.00152397	0.999428
inositol monophosphatase	cbbF3	ZMO1518	0.193399	0.548769	0.0151869	0.931512	0.0019296	0.993071	0.0513452	0.849868
ribose-phosphate pyrophosphokinase	prs	ZMO1519	0.267665	0.439086	0.199617	0.173662	0.114343	0.577514	0.244652	0.328299
conserved hypothetical protein	ZMO1520	ZMO1520	-0.000909805	0.999921	0.0646814	0.825615	-0.0155334	0.964718	-0.00111326	0.998384
conserved hypothetical protein	ZMO1521	ZMO1521	0.349441	0.723062	-0.462155	0.302115	0.0275555	0.97957	0.880204	0.444896
TonB-dependent receptor	ZMO1522	ZMO1522	-1.79663	0.0865926	-1.22356	0.162167	-1.83617	0.105077	-2.57365	0.158762
multidrug efflux pump subunit TolC	ZMO1525	ZMO1525	-0.260036	0.30333	-0.695367	0.0269677	-0.664008	0.1076	-0.671407	0.154876
multidrug efflux pump subunit AcrB	ZMO1527	ZMO1527	-0.617628	0.224	-0.930934	0.073971	-0.536509	0.177879	-1.08984	0.14417
multidrug efflux pump subunit AcrB	ZMO1528	ZMO1528	-0.497833	0.225577	-0.483231	0.0388571	-0.473015	0.185507	-0.631374	0.135016
multidrug efflux pump subunit AcrA	ZMO1529	ZMO1529	-0.219096	0.15623	-0.513648	0	-0.433832	0.133882	-0.494375	0.0736667
KpsF/GutQ family protein	ZMO1530	ZMO1530	-0.588958	0.272984	-0.250611	0.170609	0.143541	0.821131	0.328724	0.393319
phosphoribosylformylglycinamidine synthase subunit PurS	purS	ZMO1531	0.268943	0.647815	0.277241	0.079443	0.0947056	0.751554	0.253293	0.163525
phosphoribosylformylglycinamidine synthase subunit PurQ	purQ	ZMO1532	0.114817	0.69173	0.117895	0.227894	-0.0184066	0.754735	0.260647	0.165242
conserved hypothetical protein	ZMO1533	ZMO1533	-0.0864321	0.963101	-0.142679	0.794919	-0.269514	0.634354	-0.180327	0.645927
ATPase involved in DNA repair	ZMO1536	ZMO1536	-0.1299	0.490292	-0.204955	0.309442	-0.35197	0.160414	-0.195108	0.516373
DNA polymerase III alpha subunit	dnaE	ZMO1538	-0.147743	0.491935	-0.150724	0.116718	-0.110587	0.375227	-0.0592454	0.715419
FeoA family protein	feoA	ZMO1540	0.15352	0.536136	-0.171309	0.573765	-0.124078	0.819112	0.0480353	0.856823
ferrous iron transport protein B	feoB	ZMO1541	-0.0290801	0.980159	-0.0598017	0.836971	0.0308469	0.919595	0.0802396	0.757912
single-strand binding protein	ssb	ZMO1542	0.138866	0.818215	0.182766	0.225241	0.277904	0.104103	0.116261	0.465504
cobalt chelatase subunit CobT	cobT	ZMO1543	0.170905	0.451144	0.129198	0.0828636	0.133755	0.446627	0.160188	0.374214
cobalt chelatase subunit CobS	cobS	ZMO1544	0.0853939	0.862023	0.156786	0.0785714	0.120256	0.631001	0.145574	0.622418
heat shock protein DnaJ domain protein	ZMO1545	ZMO1545	0.128958	0.89026	0.199638	0.826891	-0.029864	0.934694	-0.496181	0.145824
transcriptional regulator TetR family	ZMO1547	ZMO1547	-0.0133788	0.989374	0.101596	0.664366	-0.0502586	0.87077	0.182699	0.373169
squalene-hopene cyclase	shc2	ZMO1548	0.0968844	0.233101	0.109189	0.527362	0.138258	0.668454	0.103397	0.582077
BolA family protein	bolA1	ZMO1549	-0.279512	0.777834	-0.301067	0.564613	-0.133054	0.837546	-0.208692	0.72124
ATP phosphoribosyltransferase	hisG	ZMO1550	-0.147607	0.488369	-0.0664158	0.733774	0.102954	0.775996	0.0851695	0.70904
histidinol dehydrogenase	hisD	ZMO1551	0.139577	0.506731	0.197783	0.164808	0.255568	0.197166	0.219568	0.466003
transcription antitermination factor NusB	nusB	ZMO1552	0.114182	0.778895	0.267857	0.136458	0.0353794	0.896412	0.216948	0.365183
thiamine-monophosphate kinase	thiL	ZMO1553	0.00803185	0.989058	0.053868	0.795196	-0.0662797	0.831076	0.226308	0.254969
16S rRNA (uracil(1498)-N(3))-methyltransferase	ZMO1554	ZMO1554	0.257441	0.542611	0.100688	0.387359	0.146735	0.396449	0.262325	0.394921
glutamate--cysteine ligase	gshA	ZMO1556	-0.0783641	0.816362	-0.178988	0.110547	-0.170893	0.410014	-0.25655	0.373808
amidophosphoribosyltransferase	purF	ZMO1557	0.193562	0.648074	0.0259317	0.856341	0.0632877	0.620708	0.029501	0.856034
short-chain dehydrogenase/reductase SDR	ZMO1561	ZMO1561	-0.599593	0.475302	-0.423435	0.0457917	-0.360511	0.0947368	-0.2102	0.41497
RNA pyrophosphohydrolase	ZMO1562	ZMO1562	-0.461061	0.244317	-0.316695	0.124518	-0.174988	0.390672	-0.230786	0.363765
DUF481 domain-containing protein	ZMO1563	ZMO1563	-0.542496	0.156909	-0.796514	0.0817317	-0.42669	0.101905	-0.533377	0.285223
aminoglycoside phosphotransferase	ZMO1567	ZMO1567	0.478622	0.38378	-0.359582	0.209733	0.22724	0.654118	1.09891	0.358693
TonB-dependent receptor	ZMO1568	ZMO1568	0.0467014	0.932233	0.6022	0.3663	0.0960929	0.856148	-0.0610237	0.883639
pyruvate formate-lyase 1-activating enzyme	pflA2	ZMO1569	0.207679	0.631847	0.369282	0.182295	0.663459	0.196737	0.369129	0.380569
formate acetyltransferase	pfl	ZMO1570	0.21104	0.241325	0.24892	0.079085	0.465607	0.192515	0.496154	0.140571
cytochrome bd ubiquinol oxidase subunit I	cydA	ZMO1571	0.0175425	0.990628	-0.144813	0.202405	-0.107824	0.605086	-0.123585	0.756335
cytochrome d ubiquinol oxidase subunit II	cydB	ZMO1572	-1.14402	0.398076	-0.191825	0.936405	-0.304889	0.603553	0.662266	0.65629
Dyp-type peroxidase family	ZMO1573	ZMO1573	-0.105569	0.345762	0.0324593	0.803198	0.17109	0.27517	-0.0812658	0.492218
LysR family transcriptional regulator	ZMO1574	ZMO1574	0.0723311	0.757767	0.0812003	0.803237	-0.0286153	0.894432	0.0934251	0.671437
short-chain dehydrogenase/reductase SDR	ZMO1576	ZMO1576	0.0860278	0.843624	0.0325597	0.858666	-0.199354	0.26754	-0.27795	0.467541
short-chain dehydrogenase/reductase SDR	ZMO1578	ZMO1578	-0.157879	0.610712	-0.0148932	0.952273	0.0583871	0.776114	-0.0459843	0.885578
alpha/beta hydrolase	ZMO1579	ZMO1579	0.193382	0.659111	0.131448	0.507298	-0.0269025	0.92162	-0.0180798	0.967954
antibiotic biosynthesis monooxygenase	ZMO1581	ZMO1581	0.582395	0.461376	0.612829	0.0266154	0.380671	0.163228	0.41412	0.231845
DNA gyrase B subunit	gyrB2	ZMO1583	0.00365957	0.996651	0.0223058	0.819055	0.0848433	0.416909	0.0654939	0.423141
DNA replication and repair protein RecF	recF	ZMO1584	-0.0452881	0.986777	-0.0731595	0.680111	0.0222772	0.918534	0.00752703	0.987574
bacterioferritin	bfr2	ZMO1586	0.32122	0.778648	0.172468	0.658799	0.233695	0.566701	0.234268	0.653328
hypothetical protein	ZMO1587	ZMO1587	0.16821	0.833046	0.389286	0.417091	0	1	0	1
excinuclease ABC A subunit	uvrA	ZMO1588	-0.0256081	0.944157	-0.0884743	0.62065	0.0844059	0.760162	-0.118332	0.541438
toll/interleukin-1 receptor (TIR) domain-containing protein	ZMO1589	ZMO1589	-0.0484161	0.902021	-0.0528138	0.762698	-0.0720832	0.832147	0.101961	0.64188
ABC transporter related protein	ZMO1590	ZMO1590	-0.0838006	0.630786	-0.110075	0.22571	0.000867844	0.993887	-0.136281	0.238336
ABC transporter permease	ZMO1591	ZMO1591	0.38344	0.667243	0.935002	0.342144	-0.312881	0.467316	0.525315	0.383948
alanine racemase	alr	ZMO1592	-0.0646458	0.814366	0.184603	0.363256	0.267321	0.23344	0.120881	0.260556
peptidase M61 domain-containing protein	ZMO1593	ZMO1593	-0.543674	0.193561	-0.574731	0.0879792	-0.859248	0.104622	-0.734447	0.146462
iron-containing alcohol dehydrogenase	adhB	ZMO1596	0.177761	0.46111	0.223381	0.132	0.23959	0.245912	0.11908	0.603091
1-deoxy-D-xylulose-5-phosphate synthase	dxs2	ZMO1598	-0.187349	0.300914	-0.376569	0.0261132	0.0427284	0.870784	0.0509364	0.700388
hopanoid biosynthesis associated RND transporter like protein HpnN	ZMO1599	ZMO1599	0.0809746	0.543087	0.0235825	0.919252	-0.0552597	0.765936	-0.0801023	0.428423
homoserine kinase	thrB	ZMO1600	0.201449	0.491803	0.0923112	0.491574	0.083346	0.66999	0.298228	0.259351
ribonuclease H	rnhA	ZMO1601	0.105757	0.692149	0.0807667	0.791616	-0.277119	0.630875	-0.0408808	0.959063
peptidase	ZMO1602	ZMO1602	0.297021	0.33987	-0.0488663	0.807261	-0.0944036	0.56174	0.172417	0.583483
putative protein tyrosine phosphatase	ZMO1603	ZMO1603	0.31249	0.359254	0.267417	0.146964	0.22504	0.382544	0.162572	0.681434
phosphodiesterase I	ZMO1604	ZMO1604	-0.403989	0.376464	-0.649452	0.0477113	-0.913457	0.151098	-0.792068	0.224664
pyruvate dehydrogenase E1 component subunit beta	pdhB	ZMO1605	-0.0485401	0.819718	-0.0706145	0.253266	-0.059206	0.690836	-0.12311	0.156079
pyruvate dehydrogenase E1 component subunit alpha	pdhA	ZMO1606	0.0785027	0.609424	0.00392151	0.981782	0.0255992	0.889363	0.0339756	0.790652
septum formation initiator	ZMO1607	ZMO1607	0	1	0.129124	0.938617	0.489122	0.614843	0.519967	0.497419
enolase	eno	ZMO1608	0.261703	0.389701	0.240685	0.0392889	0.30829	0.162478	0.154463	0.614274
hypothetical protein	ZMO1609	ZMO1609	0.356987	0.227914	0.318372	0.0806667	0.224589	0.332483	0.183334	0.137344
hypothetical protein	ZMO1610	ZMO1610	0.283866	0.549258	0.0320129	0.874304	-0.121822	0.757907	-0.069507	0.808773
hypothetical protein	ZMO1611	ZMO1611	-0.120747	0.798152	0.246274	0.452398	-0.0419865	0.89888	0.192961	0.617986
toluene tolerance family protein	ZMO1612	ZMO1612	0.539965	0.189455	0.235837	0.630433	0.495969	0.263961	0.406844	0.512484
transcription elongation factor GreA	greA	ZMO1615	0.0425186	0.910336	-0.145594	0.205689	-0.152475	0.456587	-0.0915731	0.708401
carbamoyl-phosphate synthase large chain	carB	ZMO1617	-0.0769653	0.648105	-0.0690002	0.148266	-0.0338084	0.877293	-0.0962702	0.364439
carbamoyl-phosphate synthase small subunit	carA	ZMO1618	0.00128237	1	-0.168677	0.342638	-0.0142784	0.959319	-0.413522	0.156203
GatB/YqeY domain-containing protein	ZMO1619	ZMO1619	0.274654	0.636305	0.142703	0.661482	0.0274728	0.953447	0.13319	0.689327
DNA primase	dnaG	ZMO1622	-0.0510801	0.791924	-0.259995	0.133356	-0.0621204	0.871363	-0.154146	0.683414
RNA polymerase sigma 70 subunit RpoD	rpoD	ZMO1623	-0.037213	0.665607	-0.0183201	0.880293	0.0890484	0.694852	-0.0897446	0.663896
ATP-binding protein	ZMO1624	ZMO1624	-0.132994	0.665816	-0.0287399	0.847333	0.0827649	0.376151	0.049736	0.857926
ribonuclease P protein component	rnpA	ZMO1625	0.176694	0.635978	-0.116897	0.612804	0.0590566	0.774936	0.0657336	0.66696
YidC translocase/secretase	yidC	ZMO1626	-0.117441	0.46084	-0.123844	0.250303	-0.146802	0.460763	-0.0749391	0.490263
GTP-binding protein HSR1-related protein	engB	ZMO1627	-0.358142	0.465761	-0.150558	0.487088	0.047856	0.878265	-0.0334969	0.93491
PepSY-associated TM helix domain-containing protein	ZMO1628	ZMO1628	0.561908	0.322512	-0.0728219	0.819724	-0.071345	0.79217	0.0899804	0.799946
TonB-dependent siderophore receptor	ZMO1631	ZMO1631	0	1	-1.77516	0.35265	1.55658	0.386906	0	1
succinyl-diaminopimelate desuccinylase	dapE	ZMO1632	0.0234515	0.923281	-0.0606461	0.507882	-0.0561097	0.828489	-0.0225118	0.963535
hypothetical protein	ZMO1633	ZMO1633	-0.383656	0.489768	-0.0177097	0.992833	0.0171331	0.992173	-0.0870984	0.95924
Smr domain-containing protein	ZMO1634	ZMO1634	0.0890675	0.866718	-0.134733	0.0279429	-0.0969124	0.713922	0.115049	0.519707
import inner membrane translocase subunit Tim44	ZMO1636	ZMO1636	0.04997	0.950533	0.0355644	0.921689	-0.234808	0.375976	0.00480207	0.988242
protein-export protein SecB	secB	ZMO1638	-0.0614681	0.935414	-0.174026	0.562892	-0.11591	0.825708	-0.195803	0.402682
integral membrane protein MviN	ZMO1639	ZMO1639	0	1	0	1	0	1	-0.610788	0.767475
tryptophanyl-tRNA synthetase	trpS	ZMO1640	0.0768223	0.733751	0.0386238	0.747685	-0.0395749	0.631899	0.0535043	0.781541
conserved hypothetical protein	ZMO1641	ZMO1641	-0.167025	0.449089	-0.370125	0.131432	-0.326712	0.284272	-0.25497	0.155343
anhydro-N-acetylmuramic acid kinase AnmK	anmK	ZMO1642	-0.343764	0.195163	-0.235256	0.378866	-0.184118	0.518947	-0.299575	0.490321
tyrosine--tRNA ligase	tyrS	ZMO1643	0.190238	0.461664	0.0530186	0.620543	0.158971	0.453707	0.142089	0.446575
ATP-dependent DNA helicase RecG	ZMO1644	ZMO1644	0.0762882	0.669337	0.0788651	0.51269	0.195061	0.286511	0.132133	0.522163
transcription-repair coupling factor	ZMO1646	ZMO1646	-0.0671755	0.632169	-0.04643	0.449047	-0.0623233	0.759551	-0.00667063	0.986592
2-amino-4-hydroxy-6- hydroxymethyldihydropteridine pyrophosphokinase	folK	ZMO1647	-0.220052	0.614336	-0.265083	0.813907	-0.338491	0.825374	0.18176	0.861914
uracil-DNA glycosylase	ung2	ZMO1648	-0.0780004	0.90636	0.0808951	0.825762	0.135496	0.66875	-0.194553	0.83454
gluconolactonase	gnl	ZMO1649	0.766857	0.186	0.438361	0.0698074	0.301239	0.443127	0.503913	0.403931
beta-lactamase	ZMO1650	ZMO1650	-0.473308	0.2715	-0.179488	0.250795	-0.0755952	0.748645	-0.0783997	0.708373
signal transduction protein	ptsP	ZMO1651	0.0277227	0.902742	0.0164687	0.643112	0.0253423	0.76	0.142506	0.42792
2-nitropropane dioxygenase NPD	ZMO1652	ZMO1652	-0.188725	0.460667	-0.0758979	0.579876	0.045337	0.805946	0.115704	0.373462
aspartate kinase	lysC	ZMO1653	0.0306231	0.901945	0.0945683	0.52391	0.0344779	0.812435	0.147688	0.397052
ubiquinone biosynthesis O-methyltransferase	ubiG	ZMO1654	0.110737	0.490459	0.246841	0.105862	0.0523186	0.832801	0.183531	0.324994
AhpC/TSA family antioxidant protein	ZMO1655	ZMO1655	0.533642	0.358639	0.267614	0.448028	0.0637614	0.882949	0.184491	0.708631
XRE family transcriptional regulator	ZMO1656	ZMO1656	0.0916576	0.702724	-0.0543823	0.727606	-0.148186	0.437717	-0.2363	0.148
conserved hypothetical protein	ZMO1657	ZMO1657	0.0466347	0.879281	-0.148896	0.181159	-0.248519	0.245324	0.00656255	0.988244
tRNA(Ile)-lysidine synthetase	ZMO1658	ZMO1658	-0.379496	0.133075	-0.540258	0.0269091	-0.499127	0.0213333	-0.531778	0.168889
ATP-dependent metalloprotease FtsH	ftsH	ZMO1659	-0.0838871	0.397912	-0.014871	0.874439	-0.0561028	0.819479	-0.133547	0.151545
conserved hypothetical protein	ZMO1660	ZMO1660	0.307901	0.785938	-0.0245501	0.958976	0.179247	0.74002	0.212042	0.603746
gamma-glutamyl phosphate reductase	proA	ZMO1661	0.0356922	0.906398	-0.110236	0.226081	0.0699781	0.769973	0.111191	0.421276
nicotinate-nicotinamide nucleotide adenylyltransferase	nadD	ZMO1662	-0.00516319	0.995796	0.0211957	0.935538	0.123594	0.667868	0.124385	0.720347
ribosome silencing factor RsfS	ZMO1663	ZMO1663	0.0611267	0.952105	0.204549	0.345835	0.0966047	0.725857	0.229364	0.187862
rRNA large subunit methyltransferase H RlmH	rlmH	ZMO1664	0.170134	0.694087	-0.174287	0.48206	0.0959123	0.789538	-0.134802	0.649241
peptidase M23	ZMO1665	ZMO1665	-0.0106157	1	-0.0992724	0.951782	-0.0530287	0.937119	0.32304	0.733192
CtpA (carboxyl-terminal protease) family protein	ctpA	ZMO1667	-0.0841802	0.761386	-0.202522	0.137066	-0.265217	0.285169	-0.116908	0.719676
disulfide bond formation protein DsbB	dsbB	ZMO1668	0.264356	0.743011	-0.213534	0.170826	-0.372567	0.206129	-0.238766	0.507538
2-octaprenylphenol hydroxylase COQ7/UbiB	ubiB2	ZMO1669	0.157939	0.762484	-0.164331	0.117357	-0.18567	0.342598	-0.131524	0.367917
hypothetical protein	ZMO1670	ZMO1670	-0.394118	0.615842	-0.165284	0.639921	-0.0775286	0.884142	-0.289026	0.396091
conserved hypothetical protein	ZMO1671	ZMO1671	0.377504	0.393711	-0.032931	0.929262	0.0633411	0.88203	-0.231602	0.545923
hypothetical protein	ZMO1672	ZMO1672	-1.22529	0.357839	-0.606284	0.079825	-0.326989	0.43013	-0.530723	0.64205
aldo/keto reductase	ZMO1673	ZMO1673	0.303935	0.37281	0.168285	0.267994	0.0911649	0.668573	0.249819	0.223943
protein-disulfide isomerase-like protein	ZMO1675	ZMO1675	-0.0231705	0.986779	-0.0573311	0.755839	-0.0571524	0.818805	-0.136356	0.589646
DUF721 domain-containing protein	ZMO1676	ZMO1676	-0.0802193	0.902331	0.0490284	0.722189	0.102892	0.538432	0.0571696	0.884042
A/G-specific adenine glycosylase	mutY	ZMO1677	0.237378	0.286601	0.0997454	0.38326	0.177965	0.619094	0.370058	0.277234
prephenate dehydratase	pheA	ZMO1678	0.055418	0.882489	0.0630989	0.373023	0.110309	0.439929	0.0717176	0.373868
YgdH family protein	ZMO1679	ZMO1679	-0.14779	0.495992	0.00457255	0.98092	-0.105567	0.215982	-0.163781	0.156
extensin family protein	ZMO1680	ZMO1680	0.114223	0.82479	0.00104332	0.998719	0.115941	0.646981	-0.0466417	0.821042
aspartate-alanine antiporter	ZMO1681	ZMO1681	0.678546	0.045	0.75319	0.0849524	0.699172	0.122432	0.706478	0.1366
aspartate/methionine/tyrosine aminotransferase	aspB	ZMO1682	0.904867	0.067913	0.97486	0.04812	0.767389	0.0328	0.835023	0.185733
type 2 L-asparaginase	ansA	ZMO1683	-0.0577208	0.896176	-0.123386	0.306669	-0.0484486	0.839044	0.0266641	0.922773
phosphoserine aminotransferase	serC	ZMO1684	0.267679	0.365874	0.112485	0.387052	-0.0566514	0.771413	0.0707995	0.79723
D-3-phosphoglycerate dehydrogenase	serA1	ZMO1685	0.257296	0.206418	0.123397	0.248348	0.13436	0.386162	0.194313	0.33241
ATP phosphoribosyltransferase regulatory subunit HisZ	hisZ	ZMO1686	0.0495911	0.862551	0.0762119	0.611392	-0.0541649	0.748826	0.0215747	0.962933
adenylosuccinate synthase	purA	ZMO1687	0.169975	0.595661	-0.108661	0.25038	-0.160191	0.447228	-0.205273	0.507094
folate-binding protein YgfZ	ygfZ	ZMO1688	0.178729	0.475004	0.1518	0.221529	0.125944	0.317165	0.192186	0.543112
multifunctional complex type dihydroorotase	pyrC2	ZMO1689	0.0665538	0.694167	-0.0111103	0.9404	0.0174421	0.935033	-0.0649935	0.809949
chaperone DnaJ domain protein	ZMO1690	ZMO1690	0.0751235	0.821535	0.056935	0.577269	0.0296472	0.882694	-0.194895	0.396845
YihY/virulence factor BrkB family protein	ZMO1691	ZMO1691	-0.49073	0.551279	0.277276	0.874834	0.527054	0.828984	-0.0190201	0.98962
enoyl-[acyl-carrier-protein] reductase FabI	fabI	ZMO1692	-0.044103	0.81995	0.048495	0.571615	-0.0407003	0.544885	-0.0585257	0.717863
chorismate synthase	aroC	ZMO1693	-0.154475	0.321644	-0.0542482	0.503533	-0.240217	0.206602	-0.182311	0.448505
TonB-dependent receptor	ZMO1694	ZMO1694	-0.0428492	0.794356	-0.149928	0.124465	-0.0664647	0.741331	-0.0777855	0.641825
predicted NADPH:quinone reductase-related Zn-dependent oxidoreductase	ZMO1696	ZMO1696	0.0684999	0.860527	0.0413837	0.913321	0.179093	0.307616	0.0645358	0.420477
HxlR family transcriptional regulator	ZMO1697	ZMO1697	0	1	-0.190788	0.608915	0.530057	0.232955	0.138854	0.757837
GTP cyclohydrolase II	ribA	ZMO1698	-0.0414708	0.839614	0.0279223	0.378351	0.150274	0.382454	-0.0984459	0.36755
exodeoxyribonuclease III XthA	xthA2	ZMO1699	-0.45728	0.366759	-0.232726	0.266766	-0.184088	0.333818	-0.189208	0.448125
hypothetical protein	ZMO1700	ZMO1700	0.0820948	0.896982	0.453128	0.0875233	0.267248	0.390261	0.390499	0.255209
outer membrane lipoprotein carrier protein LolA	ZMO1701	ZMO1701	0.104767	0.777686	0.11411	0.665242	-0.200789	0.618934	-0.187351	0.673544
DNA translocase FtsK	ftsK	ZMO1702	-0.0221666	0.908323	-0.233671	0.0851398	-0.195164	0.334667	-0.245607	0.17315
ubiquinone biosynthesis hydroxylase UbiH/UbiF/VisC/COQ6 family	ZMO1703	ZMO1703	0.106599	0.549937	0.0655346	0.505845	0.0601629	0.771055	0.088225	0.618051
ATP-dependent protease La (LON) substrate-binding domain	lon2	ZMO1704	-0.169637	0.372146	0.00710042	0.96467	0.159004	0.298642	-0.289366	0.350667
thioredoxin domain-containing protein	ZMO1705	ZMO1705	-0.0302912	0.951869	0.332582	0.0991852	0.00178019	0.99261	-0.0539068	0.809747
orotate phosphoribosyltransferase	pyrE	ZMO1707	0.0630188	0.860972	-0.0498263	0.734835	-0.164352	0.33289	0.151717	0.365103
pyridoxal phosphate biosynthetic protein PdxJ	pdxJ	ZMO1708	-0.180812	0.507743	0.0783819	0.624187	0.202635	0.226262	0.122566	0.447109
Holo-[acyl-carrier-protein] synthase	acpS	ZMO1709	-0.272997	0.398373	-0.0555846	0.912944	-0.218738	0.435116	0.0396042	0.961307
signal peptidase I	lepB	ZMO1710	-0.164675	0.555544	-0.112588	0.0793292	-0.018472	0.894053	0.044946	0.761818
AI-2E family transporter	ZMO1711	ZMO1711	-0.377773	0.424684	-0.162801	0.468426	-0.373725	0.443548	-0.377768	0.364126
peptidylprolyl isomerase FKBP-type	ZMO1712	ZMO1712	-0.113698	0.916889	-0.129291	0.316051	-0.222614	0.40119	-0.320681	0.367608
ribosomal protein S21	rpsU	ZMO1713	0.635686	0.460896	-0.178176	0.830502	0.280762	0.714197	0.46855	0.316096
biopolymer transport protein ExbD/TolR	exbD1	ZMO1715	0.0511214	0.957327	-0.257041	0.125329	-0.477081	0.184245	-0.385073	0.14728
MotA/TolQ/ExbB proton channel	exbB	ZMO1716	0.0787074	0.898519	-0.0862923	0.721251	-0.197293	0.332902	-0.187419	0.398196
TonB family protein	ZMO1717	ZMO1717	-0.169703	0.707251	-0.270938	0.0517168	-0.372283	0.124395	-0.404612	0.145407
conserved hypothetical protein	ZMO1718	ZMO1718	-0.0283705	0.859375	-0.228005	0.102655	-0.306758	0.18383	-0.393071	0.200531
fructokinase	frk	ZMO1719	0.040657	0.821811	-0.0812721	0.757835	0.0358213	0.901987	-0.0334345	0.940281
DNA-directed RNA polymerase omega subunit	rpoZ	ZMO1720	-0.156755	0.540889	-0.227587	0.24828	-0.0670484	0.86903	-0.100294	0.58317
glyoxalase/bleomycin resistance protein dioxygenase	gloA3	ZMO1721	0.0199649	0.987625	0.232627	0.132818	0.129336	0.647676	-0.111155	0.741721
Zn-dependent alcohol dehydrogenases class III	adhC	ZMO1722	-0.0640672	0.70783	-0.105118	0.373236	-0.0364787	0.639373	0.0600586	0.490733
laccase	ZMO1723	ZMO1723	-0.120649	0.623947	-0.0337906	0.887032	-0.173386	0.386511	0.0798308	0.81076
UDP-N-acetylglucosamine 1-carboxyvinyltransferase	murA	ZMO1724	0.000646591	1	0.0654793	0.540755	0.246016	0.275261	0.157145	0.284593
ATP-dependent Clp protease adaptor protein ClpS	ZMO1725	ZMO1725	-0.0982939	0.822394	0.0172431	0.912597	0.0875886	0.745192	0.354663	0.141838
aminotransferase class I and II	ZMO1727	ZMO1727	0.149291	0.676928	0.302219	0.0707717	0.333577	0.203962	0.801286	0.16
hypothetical protein	ZMO1728	ZMO1728	0.620284	0.136156	0.146507	0.69101	0.105352	0.461451	-0.178631	0.885404
conserved hypothetical protein	ZMO1729	ZMO1729	-0.100899	0.777839	-0.125898	0.460985	0.0483913	0.881625	0.2796	0.324593
serine O-acetyltransferase	cysE	ZMO1730	0.148537	0.824156	0.0390778	0.886991	0.185347	0.757494	0.158301	0.656766
alkyl hydroperoxide reductase	ahpC	ZMO1732	0.618656	0.330984	0.34761	0.147206	0.312073	0.337226	0.223684	0.508052
transcriptional regulator OxyR	oxyR	ZMO1733	0.041261	0.908199	-0.05314	0.612241	-0.236948	0.285356	0.0350641	0.890759
conserved hypothetical protein	ZMO1734	ZMO1734	0.0271397	0.970534	-0.0238953	0.825723	0.197217	0.543787	0.0122585	0.978417
glycosyl transferase family 1	ZMO1735	ZMO1735	0.147198	0.734574	0.0503883	0.66126	0.0228011	0.907857	0.00955518	0.978813
LytTR family two component transcriptional regulator	ZMO1738	ZMO1738	0.119451	0.692668	-0.0241788	0.853948	0.147731	0.598506	-0.0981401	0.396301
signal transduction histidine kinase LytS	ZMO1739	ZMO1739	-0.0393982	0.897433	-0.235644	0.170995	0.110284	0.575119	0.0362161	0.896869
DUF3297 domain-containing protein	ZMO1740	ZMO1740	-0.106752	0.879046	-0.0879682	0.716188	-0.247545	0.443683	-0.0586961	0.895807
GTP-binding elongation factor 4 LepA	lepA	ZMO1741	-0.181031	0.274503	-0.246216	0.0257391	-0.106868	0.549172	0.0343692	0.448865
bis(5'nucleosyl)-tetraphosphatase ApaH	apaH2	ZMO1743	-0.240092	0.461082	-0.43863	0.133874	-0.321903	0.389962	-0.342906	0.424659
methionine synthase MetH2	metH2	ZMO1745	-0.163725	0.196704	-0.0948613	0.323266	-0.013581	0.80155	-0.137001	0.374576
5-methyltetrahydrofolate--homocysteine methyltransferase MetH1	metH1	ZMO1746	-0.000545502	1	-0.218512	0.0767714	0.0813147	0.634232	-0.0411224	0.83114
5,10-methylenetetrahydrofolate reductase	metF	ZMO1747	-0.187593	0.359436	-0.256568	0.110482	-0.143612	0.284119	-0.118325	0.478626
ArsR family transcriptional regulator	ZMO1748	ZMO1748	-0.161914	0.586957	-0.0704702	0.661811	-0.105483	0.742733	-0.031531	0.895959
lipoprotein MlaA	mlaA	ZMO1749	0.150336	0.802222	0.14878	0.208567	0.161205	0.194793	0.17669	0.384914
inhibitor I42 domain-containing protein	ZMO1750	ZMO1750	-0.0660979	0.925882	-0.258006	0.345355	0.288137	0.199467	-0.411498	0.351684
hypothetical protein	ZMO1752	ZMO1752	-0.0546392	0.965374	-0.0160141	0.976984	-0.289836	0.757577	-0.14953	0.772492
ferredoxin--NADP(+) reductase Fpr	fpr	ZMO1753	0.0132395	0.986409	-0.0703405	0.696301	0.160094	0.38984	0.230412	0.357361
succinate-semialdehyde dehydrogenase SSADH	ssdA	ZMO1754	0.477492	0.222493	0.285909	0.032	0.176624	0.289355	0.0906258	0.779532
thymidylate synthase	thyB	ZMO1755	0.0833321	0.445856	0.157108	0.365254	0.155522	0.308395	0.107569	0.583342
gluconate transporter GntP	gntP	ZMO1756	0.456391	0.462132	0.267009	0.330131	0.139074	0.677163	0.159517	0.856283
gluconate kinase GntK	gntK	ZMO1757	0.261901	0.390011	-0.0308278	0.854635	-0.198559	0.456303	-0.107789	0.77274
outer membrane assembly lipoprotein YfiO	ZMO1758	ZMO1758	0.145001	0.666866	0.00268046	0.988547	-0.108085	0.722173	-0.18402	0.642004
penicillin-binding protein activator	ZMO1760	ZMO1760	0.000945409	1	-0.0812257	0.274503	-0.214334	0.38711	-0.238475	0.18271
ribosomal RNA small subunit methyltransferase I RsmI	rsmI	ZMO1761	0.0280253	0.97138	0.0127366	0.934922	0.23865	0.299039	0.290457	0.468995
hypothetical protein	ZMO1763	ZMO1763	-0.101435	0.867135	-0.162406	0.250119	-0.305874	0.198835	-0.177704	0.172857
murein L,D-transpeptidase YcbB/YkuD-like protein	ZMO1764	ZMO1764	-0.211754	0.632248	-0.41167	0.13387	-0.572303	0.162964	-0.390277	0.456139
zinc transporter ZntB	ZMO1766	ZMO1766	-0.0546989	0.836309	-0.0949427	0.423976	-0.0505002	0.863931	-0.102635	0.543652
UTP-glucose-1-phosphate uridylyltransferase	galU	ZMO1767	-0.00529989	0.99378	-0.043218	0.502024	-0.0607351	0.801815	-0.276576	0.422068
diaminopimelate decarboxylase	lysA2	ZMO1768	0.0466042	0.779362	-0.0683409	0.620833	0.00346057	0.991894	-0.0995305	0.786669
conserved hypothetical protein	ZMO1769	ZMO1769	-0.576761	0.618348	0.164067	0.924715	0.291701	0.825352	0.317696	0.841576
argininosuccinate lyase	argH	ZMO1770	0.14011	0.549373	0.13802	0.107797	0.175231	0.195538	0.00636482	0.982275
iron-containing alcohol dehydrogenase	ZMO1771	ZMO1771	0.119904	0.322436	0.00329717	0.979659	-0.0432103	0.768349	-0.00591087	0.985812
NAD(P)H quinone oxidoreductase PIG3 family	ZMO1772	ZMO1772	-0.124601	0.536137	0.0554822	0.85443	0.195772	0.560719	0.19007	0.623271
aldo/keto reductase	ZMO1773	ZMO1773	-0.317673	0.160565	0.238402	0.248429	0.233561	0.26515	0.247031	0.396113
aminopeptidase N	pepN2	ZMO1776	0.105645	0.525475	0.10827	0.147038	-0.153329	0.54315	-0.150566	0.68644
conserved hypothetical protein	ZMO1777	ZMO1777	0.505052	0.682642	0.0296313	0.921713	0.264198	0.818979	-0.131259	0.896907
antibiotic biosynthesis monooxygenase	ZMO1779	ZMO1779	0.211135	0.541801	0.190643	0.260051	0.123927	0.392381	-0.113324	0.575085
antibiotic biosynthesis monooxygenase	ZMO1780	ZMO1780	0.105516	0.69156	0.21726	0.130832	0.0717049	0.796424	0.0601673	0.717488
mechanosensitive ion channel MscS	mscS3	ZMO1781;ZMO1785	-0.280657	0.430423	-0.16216	0.2024	-0.226798	0.647353	-0.20546	0.68233
conserved hypothetical protein	ZMO1784	ZMO1784	-0.320633	0.430948	0.621026	0.354677	0.105876	0.877885	-0.634084	0.683279
hypothetical protein	ZMO1786	ZMO1786;ZMO1782	0.706458	0.600352	0.287156	0.826613	0.229695	0.756573	0	1
hypothetical protein	ZMO1788	ZMO1788	0.161713	0.57582	-0.20577	0.208168	-0.305712	0.295217	-0.389787	0.255537
ABC transporter related protein	ZMO1790	ZMO1790	-0.0684083	0.839148	-0.159395	0.131435	-0.0746307	0.694274	-0.0463778	0.848404
dihydroxy-acid dehydratase	ilvD	ZMO1792	0.159027	0.61287	0.121164	0.354934	0.0252247	0.91423	0.0376422	0.934779
LysR family transcriptional regulator	ZMO1793	ZMO1793	-0.14602	0.865976	0.37015	0.147411	0.165165	0.446958	0.131475	0.686469
conserved hypothetical protein	ZMO1794	ZMO1794	0.282738	0.636211	0.130419	0.393063	0.170446	0.65388	-0.0379944	0.861789
3-phosphoshikimate 1-carboxyvinyltransferase	aroA	ZMO1796	0.140336	0.636416	0.092289	0.0817725	0.146764	0.299096	0.300409	0.15425
cytidylate kinase	cmk	ZMO1797	0.062151	0.777469	0.0939674	0.308991	0.213266	0.161809	0.27059	0.146824
ribosomal protein S1	rpsA	ZMO1798	0.14452	0.636637	0.123709	0.203844	0.14784	0.177851	0.17557	0.142154
PhzF family phenazine biosynthesis protein	ZMO1800	ZMO1800	-0.086024	0.455685	-0.118255	0.315926	-0.126787	0.511301	0.049415	0.736917
integration host factor beta subunit	ihfB	ZMO1801	-0.363267	0.365943	0.000652949	0.997562	-0.0610809	0.634956	-0.223896	0.363571
amino acid permease-associated region	ZMO1804	ZMO1804	0.616007	0.762165	-1.25778	0.522233	-0.462194	0.82885	0.130822	0.652913
HAD superfamily phosphoglycolate phosphatase	cbbZ	ZMO1805	-0.187032	0.869482	0.139246	0.267235	0.14528	0.669093	0.481494	0.151415
maltose O-acetyltransferase	ZMO1806	ZMO1806	0.391984	0.13105	0.573723	0.0287018	0.548147	0.0988169	0.427239	0.197805
RnfH family protein	rfnH	ZMO1808	-0.0551294	0.936729	-0.0314922	0.891591	0.0136414	0.959247	-0.25915	0.365502
electron transport complex RnfABCDGE type E subunit	rfnE	ZMO1809	0.322996	0.691843	-0.114366	0.604241	-0.0274588	0.713263	0.0404867	0.953264
electron transport complex RnfABCDGE type G subunit	rnfG	ZMO1810	-0.276192	0.54322	-0.0102685	0.937682	0.0481625	0.897591	-0.089138	0.633133
electron transport complex RnfABCDGE type D subunit	rnfD	ZMO1811	0.400931	0.392584	-0.333068	0.298152	-0.129592	0.757008	-0.0255451	0.906213
electron transport complex RnfABCDGE type C subunit	rnfC	ZMO1812	0.00947952	0.991172	-0.0739352	0.146625	0.099905	0.688287	-0.0915864	0.530834
electron transport complex RnfABCDGE type B subunit	rnfB	ZMO1813	0.0752417	0.950679	-0.187337	0.193869	0.0761153	0.832789	-0.0319843	0.968095
electron transport complex RnfABCDGE type A subunit	rnfA	ZMO1814	-5.24032	0.054	1.11078	0.818601	-0.454666	0.94107	0	1
nif-specific transcriptional activator NifA	nifA	ZMO1816	0.0181497	0.998886	-0.840305	0.507783	-0.483235	0.755219	-0.0196896	0.963866
nitrogen fixation protein FixT/FixU	fixU	ZMO1820	-0.0324135	0.981465	-0.0490259	0.715692	0.0663986	0.870033	-0.0664043	0.602818
SIR2 family protein	ZMO1821	ZMO1821	-0.0730375	0.983013	-0.0940539	0.645019	0.0846049	0.892124	0.0391865	0.941565
nitrogenase reductase iron protein	nifH	ZMO1823	0	1	-0.230777	0.925886	0	1	0	1
nitrogen fixation protein NifX	nifX	ZMO1828	0.161178	0.761106	0.323491	0.564979	0.265884	0.601125	0.338772	0.233128
TOBE domain protein	ZMO1838	ZMO1838	-0.964718	0.533023	-0.70272	0.621956	0.500989	0.37685	0.464993	0.278364
isochorismatase hydrolase	ZMO1840	ZMO1840	-0.450826	0.635711	-0.545328	0.607528	-0.481312	0.687492	-0.210166	0.841338
positive regulator of sigma E RseC/MucC	rseC	ZMO1841	0	1	-0.853455	0.106008	0.819612	0.632396	-0.184542	0.945813
ApbE family lipoprotein	apbE	ZMO1842	-0.00495974	0.99737	-0.312662	0.0890891	-0.0577017	0.88379	-0.12445	0.861787
oxidoreductase domain protein	ZMO1844	ZMO1844	0.101813	0.456602	-0.0553404	0.271296	-0.104239	0.605315	-0.214859	0.442284
PhnA protein	ZMO1845	ZMO1845	0.00362142	1	-0.00025622	0.998872	-0.273031	0.559741	-0.0859229	0.79918
iron ABC transporter permease	ZMO1848	ZMO1848	0.0196273	0.998227	-0.0780589	0.801485	-0.694104	0.77093	0.196496	0.812825
flavodoxin	fldA	ZMO1851	0.243558	0.906351	0.00847435	0.992577	-0.149687	0.875874	0.0692902	0.948803
dihydrodipicolinate synthetase	dapA2	ZMO1853	-0.193192	0.690562	-0.215852	0.339171	0.135188	0.649236	0.120817	0.757839
transcriptional regulator GntR family with aminotransferase domain	ZMO1854	ZMO1854	-0.162985	0.826722	0.0936476	0.387412	0.138882	0.275598	0.155172	0.468436
glutamine amidotransferase class-I	yfeJ	ZMO1855	0.115531	0.659788	0.0170778	0.931776	0.0891476	0.769154	0.0552514	0.856784
LysR family transcriptional regulator	ZMO1857	ZMO1857	0.100519	0.772542	-0.0427564	0.882541	0.163964	0.551738	-0.0863736	0.736342
carbohydrate porin	rpfN	ZMO1859	-1.11872	0.5442	-0.0912933	0.950197	-1.08936	0.652225	-1.10048	0.163195
putative Ccc1 family vacuolar ion transporter	ZMO1860	ZMO1860	-0.413047	0.762077	-0.475717	0.182	-0.444567	0.184	-0.537716	0.231391
2-nitropropane dioxygenase NPD	ZMO1861	ZMO1861	-0.496199	0.455905	-0.0683848	0.890925	0.359806	0.159633	-0.0732765	0.942521
beta-lactamase domain protein	ZMO1866	ZMO1866	-0.22132	0.399548	-0.121372	0.181445	-0.101705	0.642848	-0.0875149	0.583109
Baf family transcriptional acitvator	ZMO1867	ZMO1867	-0.123266	0.635983	0.0331675	0.92217	0.0788523	0.818202	0.0417264	0.934932
biotin--[acetyl-CoA-carboxylase] ligase	birA	ZMO1868	0.459505	0.453631	-0.0406106	0.880459	0.0515588	0.897657	0.125744	0.789728
ribonuclease I-like protein	ZMO1869	ZMO1869	-0.0347449	0.964981	0.20528	0.293089	0.277203	0.195214	-0.293818	0.544048
nicotinate-nucleotide pyrophosphorylase	nadC	ZMO1870	0.0216974	0.963047	-0.0590089	0.696432	-0.180025	0.339176	-0.147271	0.491516
quinolinate synthetase complex A subunit	nadA	ZMO1871	0.0853297	0.837935	0.145872	0.225307	0.0151234	0.884295	0.0711778	0.759434
conserved hypothetical protein	ZMO1872	ZMO1872	-0.145856	0.783854	0.0531425	0.890271	0.129981	0.758725	-0.0182667	0.98
glutaredoxin-like protein	ZMO1873	ZMO1873	-0.162764	0.607752	0.114246	0.364422	0.130919	0.501253	0.186282	0.286173
BolA family transcriptional regulator	bolA2	ZMO1874	0.219231	0.675768	0.189707	0.537478	0.0281518	0.918817	-0.683708	0.227628
DUF1476 domain-containing protein	ZMO1875	ZMO1875	0.141502	0.90413	0.110907	0.661991	0.200937	0.286264	-0.137349	0.683554
conserved hypothetical protein	ZMO1876	ZMO1876	-0.0263017	0.90614	0.0728957	0.80895	0.0534407	0.883934	-0.0971012	0.720373
glutamine cyclotransferase	ZMO1877	ZMO1877	0.402431	0.303649	0.466209	0.0854667	0.455385	0.189862	0.261562	0.456122
valine--tRNA ligase	valS	ZMO1878	0.194317	0.174039	0.0988496	0.211528	0.0564512	0.743609	0.01448	0.980051
porphobilinogen synthase	hemB	ZMO1879	-0.220157	0.13441	-0.214905	0.0958104	-0.1768	0.231685	-0.048474	0.427725
hypothetical protein	ZMO1880	ZMO1880	-0.558375	0.361661	-0.417062	0.250227	-0.414935	0.422711	-0.628407	0.13931
D-3-phosphoglycerate dehydrogenase	serA2	ZMO1883	0.353558	0.363852	0.257916	0.114681	0.210332	0.497122	0.332715	0.316677
DUF208 domain-containing protein	ZMO1884	ZMO1884	0.424174	0.576678	0.133902	0.374464	0.0852159	0.618201	0.053407	0.631004
NADH:flavin oxidoreductase	ZMO1885	ZMO1885	0.247978	0.358041	0.454905	0.041	0.513957	0.107489	0.364637	0.151887
isochorismatase hydrolase	entB	ZMO1887	0.0276928	0.960602	0.208021	0.0892808	0.0901432	0.408582	0.139228	0.411074
SAM-dependent methyltransferase-like protein	ZMO1889	ZMO1889	-0.00162888	0.998961	-0.0692902	0.271782	-0.0279293	0.742936	0.0741329	0.673353
mitochondrial processing peptidase-like protein	ZMO1890	ZMO1890	0.0662441	0.875321	0.112562	0.510508	0.00904274	0.97765	-0.130765	0.697131
threonine synthase	thrC	ZMO1891	0.00578054	0.990034	-0.0130374	0.871575	0.00775782	0.88564	0.0871582	0.700951
conserved hypothetical protein	ZMO1892	ZMO1892	0.146725	0.303291	-0.576419	0.133755	-0.177731	0.459027	-0.388944	0.323539
adenosine kinase	ZMO1895	ZMO1895	0.180773	0.674828	0.062795	0.618663	0.0144507	0.918484	0.0361716	0.760574
protein-export membrane protein SecF	secF	ZMO1896	-0.236331	0.336295	-0.174205	0.131404	-0.199543	0.524631	-0.182328	0.368009
protein-export membrane protein SecD	secD	ZMO1897	-0.240528	0.136857	-0.161145	0.236276	-0.182219	0.459136	-0.226313	0.163544
preprotein translocase YajC subunit	yajC	ZMO1898	-0.13398	0.691159	-0.0793101	0.883868	-0.0174605	0.975838	0.0308177	0.957949
3-oxoacyl-(acyl-carrier-protein) synthase III	fabH	ZMO1899	-0.0441208	0.926167	-0.0129191	0.950959	0.0110817	0.983382	0.252955	0.369526
fatty acid/phospholipid synthesis protein PlsX	plsX	ZMO1900	0.169669	0.359512	0.143038	0.0953615	0.106723	0.604186	0.255637	0.311407
hypothetical protein	ZMO1901	ZMO1901	0.0543537	0.818253	0.0209166	0.921854	0.0533632	0.878241	-0.0274175	0.689054
porphobilinogen deaminase	hemC	ZMO1903	-0.0553996	0.818118	-0.0448964	0.866894	0.0495828	0.847449	0.384487	0.364292
tRNA(adenosine(37)-N6)-threonylcarbamoyltransferase complex transferase subunit TsaD	ZMO1904	ZMO1904	0.109309	0.856547	0.29056	0.117265	0.348901	0.199754	0.130184	0.270348
glycerol-3-phosphate dehydrogenase (NAD(P)(+))	gpsA	ZMO1905	0.246562	0.48529	0.139268	0.324464	0.140018	0.22353	0.387632	0.140679
translation initiation factor IF-3	infC	ZMO1906	-0.0354392	0.92874	0.127502	0.207869	-0.00221316	0.994479	0.0489966	0.835124
DNA mismatch repair protein MutS	mutS	ZMO1907	0.113458	0.681831	0.221738	0.134849	0.242997	0.332498	0.198291	0.398454
outer membrane protein assembly factor BamE	ZMO1908	ZMO1908	-0.267022	0.37646	-0.301296	0.355196	-0.234471	0.411289	-0.111821	0.359597
DUF177 domain-containing protein	ZMO1909	ZMO1909	-0.22366	0.363591	0.00785255	0.965571	0.000673294	0.99555	-0.144403	0.451603
50S ribosomal protein L25	rplY	ZMO1910	-0.110671	0.487347	0.0784314	0.197506	0.101354	0.436133	0.0898603	0.39729
peptidyl-tRNA hydrolase	ZMO1911	ZMO1911	-0.485485	0.328961	-0.294898	0.15464	0.163433	0.696748	-0.00741641	0.987241
redox-regulated ATPase YchF	ychF	ZMO1912	-0.00766055	0.988591	0.0134074	0.949561	0.12699	0.332857	0.056263	0.636973
glutathione synthetase	gshB	ZMO1913	0.171104	0.364087	0.0535088	0.710572	0.0203711	0.912567	0.104987	0.56861
integrase family protein	xerC	ZMO1914	0.00619189	0.99692	0.151674	0.691302	0.0180353	0.952735	0.289448	0.233036
dethiobiotin synthase	bioD	ZMO1915	0.173569	0.485765	-0.0824191	0.782949	0.0109056	0.977877	-0.00748444	0.984593
pimeloyl-[acyl-carrier protein] methyl ester esterase BioH	bioH	ZMO1916	0.0802155	0.863146	-0.0699056	0.836335	0.263779	0.304904	0.126446	0.753157
8-amino-7-oxononanoate synthase	bioF	ZMO1917	0.0573641	0.83979	-0.038887	0.774759	-0.0219345	0.911971	0.00087738	0.998265
adenosylmethionine--8-amino-7-oxononanoate aminotransferase BioA	bioA	ZMO1918	0.123943	0.554948	0.18052	0.252771	0.0224743	0.941829	-0.0173314	0.964794
thiol-disulfide isomerase	ZMO1919	ZMO1919	-0.351582	0.803484	-0.281172	0.70616	-0.442619	0.382871	-0.777937	0.490222
hypothetical protein	ZMO1920	ZMO1920	-0.128812	0.772684	0.125083	0.94542	-1.46334	0.151456	-0.47917	0.831192
primosomal protein N'	priA	ZMO1921	0.240465	0.17532	-0.0966752	0.424264	0.0553697	0.393814	0.164355	0.439597
capsule polysaccharide biosynthesis protein	kpsS	ZMO1922	0.147406	0.777441	0.0571047	0.691577	0.0948524	0.819047	0.0319252	0.808723
sulfatase	ZMO1923	ZMO1923	-0.132845	0.827268	0.01286	0.965138	-0.0944233	0.763898	-0.127774	0.491476
peptidase U32	ZMO1924	ZMO1924	-0.167567	0.244519	-0.23957	0.109266	-0.0610727	0.744778	-0.118877	0.491379
sterol-binding peptidase U32 family peptidase	ZMO1925	ZMO1925	0.0600808	0.822022	-0.035951	0.779802	-0.0195516	0.858474	-0.05948	0.511755
signal peptide peptidase SppA 67K type	sppA	ZMO1927	-0.071125	0.636364	-0.123908	0.107797	-0.157567	0.566186	-0.204497	0.196319
chaperonin Cpn10	groES	ZMO1928	0.0840734	0.691977	0.175678	0.238981	0.229459	0.371442	0.211189	0.438472
chaperonin GroEL	groEL	ZMO1929	0.165777	0.559307	0.213444	0.162335	0.177893	0.390348	0.169361	0.490825
hypothetical protein	ZMO1932	ZMO1932	0.12736	0.596871	-0.163178	0.370494	-0.166039	0.177452	-0.242848	0.232105
hypothetical protein	ZMO1933	ZMO1933	0.00967216	0.981686	0.0375099	0.62017	0.15339	0.390998	0.0446383	0.849369
N-6 DNA methylase	ZMO1934	ZMO1934	0.131859	0.469221	0.140222	0.185756	0.218201	0.18549	0.137414	0.397534
GntR transcriptional regulator with aminotransferase domain	ZMO1944	ZMO1944	0.00840251	0.990522	-0.099741	0.37422	0.200932	0.585422	-0.00335566	0.989614
PhzF-like isomerase	ZMO1945	ZMO1945	0.0544535	0.917455	0.0119438	0.950314	0.0207946	0.914913	-0.0245031	0.85047
short-chain dehydrogenase/reductase SDR	ZMO1946	ZMO1946	0.133296	0.659964	0.40653	0.193078	0.309276	0.331329	0.336872	0.398234
RidA (reactive intermediate/imine deaminase A) family protein	ZMO1947	ZMO1947	0.69245	0.542922	-0.51722	0.529624	0.863735	0.474754	0	1
YbaK/prolyl-tRNA synthetase associated family protein	ZMO1948	ZMO1948	0.0238323	0.995683	-0.26976	0.643412	-0.288137	0.552173	0.307199	0.439622
ribosyldihydronicotinamide dehydrogenase	ZMO1949	ZMO1949	0.163977	0.743662	0.0716883	0.802833	0.298444	0.294143	0.150122	0.723889
aminotransferase	ZMO1950	ZMO1950	0.0819562	0.821716	0.0670045	0.682338	-0.0644366	0.818791	0.272288	0.457263
ribonuclease activity regulator RraA family	rraA	ZMO1951	-0.0641238	0.969907	-0.0431881	0.89995	-0.170949	0.647452	-0.295897	0.43244
3-methyl-2-oxobutanoate hydroxymethyltransferase	panB1	ZMO1952	0.374013	0.597902	-0.0235526	0.955407	0.0168145	0.985276	0.115116	0.712705
pantoate-beta-alanine ligase	panC1	ZMO1954	0.160855	0.360815	0.0572624	0.893094	0.149767	0.599751	0.0624847	0.798353
malate dehydrogenase	mdh	ZMO1955	0.204048	0.337472	0.134897	0.229589	0.101826	0.198735	0.0767028	0.738735
DNA repair protein RecN	recN	ZMO1956	-0.0679258	0.817663	-0.0310555	0.802283	0.13401	0.543533	-0.106855	0.622862
glycosyl transferase family 1	ZMO1957	ZMO1957	-0.133696	0.652649	-0.00721486	0.939009	-0.0320002	0.905872	-0.00853539	0.979506
hypothetical protein	ZMO1958	ZMO1958	-0.249476	0.640881	-0.00575002	0.992424	-0.00800769	0.986179	0.698121	0.680806
hypothetical protein	ZMO1959	ZMO1959	-0.153664	0.491209	-0.134912	0.181779	-0.106277	0.221105	-0.0254402	0.830174
hypothetical protein	ZMO1960	ZMO1960	0.187749	0.434087	-0.0769672	0.742481	0.336095	0.351401	0.0724208	0.896519
conserved hypothetical protein	ZMO1961	ZMO1961	-0.54882	0.636441	0.155464	0.330591	-0.0714289	0.894171	0.0152493	0.971268
histidine kinase	ZMO1962	ZMO1962	-0.222925	0.270651	-0.0103792	0.954546	0.0588239	0.533028	-0.0958735	0.559636
citrate synthase I	gltA	ZMO1963	0.22439	0.276	0.260601	0.255415	0.400485	0.186162	0.304745	0.28697
glutamate--tRNA ligase	gltX2	ZMO1964	-0.00174205	0.998313	-0.0863571	0.320337	-0.10458	0.495915	-0.182053	0.528504
conserved hypothetical protein	ZMO1966	ZMO1966	-0.231349	0.601298	-0.231525	0.30922	-0.330315	0.188675	-0.300451	0.260978
beta-lactamase	blaP	ZMO1967	0.0188866	0.981832	-0.162098	0.424596	-0.317261	0.201305	-0.133751	0.396231
Sel1 domain protein repeat-containing protein	ZMO1969	ZMO1969	0.0463314	0.817554	0.00105286	0.99769	-0.0539875	0.874604	0.0528367	0.925386
3-methyl-2-oxobutanoate hydroxymethyltransferase	panB2	ZMO1970	-0.0582981	0.90421	-0.0612075	0.611652	-0.0945625	0.66909	-0.0594412	0.599502
LysR family transcriptional regulator ArgP	ZMO1974	ZMO1974	-0.144051	0.495193	0.0949141	0.854023	-0.0854638	0.882852	-0.0447445	0.856701
ornithine cyclodeaminase	ZMO1975	ZMO1975	-0.00144895	1	0.117956	0.716596	0.0642389	0.910373	0.10447	0.711644
hypothetical protein	ZMO1976	ZMO1976	-0.586147	0.350643	-0.770135	0.143903	-0.65118	0.317588	-0.76036	0.4196
partition protein ParB	parB	ZMO1978	-0.187321	0.243566	-0.0789725	0.58816	0.016072	0.958955	0.0595442	0.767877
partition protein ParA	parA	ZMO1979	-0.388112	0.185966	-0.0879625	0.684711	-0.0225995	0.971129	-0.103898	0.782216
16S rRNA methyltransferase GidB	gidB	ZMO1980	-0.0981057	0.611434	-0.00550588	0.993308	-0.0213038	0.948655	-0.0537357	0.918389
glucose inhibited division protein A GidA	gidA	ZMO1981	-0.0517985	0.537073	-0.154708	0.194012	-0.20997	0.245841	-0.0553303	0.819951
SMP-30/Gluconolaconase/LRE domain-containing protein	ZMO1983	ZMO1983	0.348167	0.322218	0.28021	0.12472	0.109439	0.669009	-0.515395	0.443959
aldo/keto reductase	ZMO1984	ZMO1984	-0.00940704	0.990328	0.150472	0.570973	0.314754	0.297779	0.0695724	0.38782
tRNA modification GTPase TrmE	trmE	ZMO1988	-0.189901	0.328906	-0.157045	0.0895266	-0.0324014	0.877386	-0.111055	0.563756
methylated-DNA--protein-cysteine methyltransferase	ZMO1989	ZMO1989	-0.228859	0.538064	0.199122	0.110591	0.356621	0.159933	0.395089	0.212058
carboxymethylenebutenolidase	clcD2	ZMO1992	0.248725	0.323322	0.326981	0.273109	0.297086	0.447788	0.245517	0.361762
quinone oxidoreductase	qor	ZMO1993	0.229354	0.174757	0.32144	0.0721752	0.270699	0.102485	0.121665	0.61706
transcription termination factor Rho	rho	ZMO1996	-0.186298	0.37263	-0.171899	0.0245882	-0.137367	0.0990588	0.0508912	0.690252
CopD family protein	ZMO1997	ZMO1997	-0.814935	0.648031	0.0474758	0.986916	-0.104362	0.868897	-0.217739	0.753792
uroporphyrinogen decarboxylase	hemE	ZMO1998	0.196404	0.75267	0.167157	0.136568	0.0661424	0.514604	0.364817	0.312394
ribosomal protein S12	ZMO2002	ZMO2002	0.14761	0.764102	0.0612717	0.481224	0.0845782	0.639138	0.07724	0.549471
ribosomal protein S10	ZMO2003	ZMO2003	-0.0932776	0.64492	0.0880432	0.541945	0.166817	0.132	0.111915	0.734508
ribosomal protein S19	ZMO2004	ZMO2004	-0.0123698	0.986868	0.119544	0.0783401	0.153689	0.226466	0.131179	0.363264
ATP synthase FoF1 assembly protein I	ZMO2005	ZMO2005	-0.37508	0.630865	-0.0721677	0.794999	-0.283352	0.227795	-0.0647793	0.918574
preprotein translocase SecE subunit	ZMO2006	ZMO2006	0	1	-0.654973	0.383486	-0.160554	0.747702	0.0144558	0.987886
conserved hypothetical protein	ZMO2007	ZMO2007	0.0498377	0.904915	-0.0641975	0.67275	0.015557	0.956623	-0.0354538	0.313284
DUF465 domain-containing protein	ZMO2009	ZMO2009	0	1	-0.0624453	0.935969	0.00680161	0.993391	-0.482693	0.507395
hypothetical protein	ZMO2010	ZMO2010	0	1	0	1	0	1	-1.09998	0.518978
acyl carrier protein	ZMO2012	ZMO2012	0.527796	0.449482	-0.00726128	0.980878	-0.0403728	0.930865	0.237069	0.448868
conserved hypothetical protein	ZMO2014	ZMO2014	0.047987	0.98353	-0.220316	0	-0.197728	0.271288	-0.183273	0.367873
conserved hypothetical protein	ZMO2015	ZMO2015	0.124793	0.565681	0.045049	0.567244	0.178753	0.230821	0.0894858	0.274224
capsule biosynthesis phosphatase	ZMO2017	ZMO2017	-0.145266	0.743367	-0.15512	0.315296	-0.19265	0.475044	-0.0645676	0.800244
DUF2474 domain-containing protein	ZMO2021	ZMO2021	0	1	0.0329177	0.964021	0.295284	0.843731	0.112844	0.855358
membrane-bound lytic murein transglycosylase MltA	ZMO2023	ZMO2023	0.143845	0.734454	-0.301301	0.170521	-0.178869	0.647702	-0.428571	0.223292
biopolymer transport protein ExbD/TolR	exbD	ZMO2025	-0.321057	0.491066	-0.319585	0.0272667	-0.445786	0.192439	-0.38182	0.149767
hypothetical protein	ZMO2026	ZMO2026	-0.372776	0.638596	-0.0229861	0.945014	-0.117047	0.748618	0.12256	0.841107
ribosomal protein L32	ZMO2031	ZMO2031	-0.206501	0.892963	0.440766	0.35312	-1.74044	0.667957	-0.0238221	0.883994
XRE family transcriptional regulator	ZMO2033	ZMO2033	-0.344544	0.909621	0.14938	0.952399	-0.712234	0.669242	-0.813613	0.592425
Sel1 domain protein repeat-containing protein	ZMO2040	ZMO2040;ZMO0135	0.663179	0.279915	-0.418995	0.420043	1.53842	0.495325	1.54962	0.357259
Sel1 domain protein repeat-containing protein	ZMO2041	ZMO2041	-0.236432	0.536226	-0.0860507	0.784036	-0.102613	0.621302	-0.63813	0.141743
SIR2-like protein	ZMOp32x001	ZMOp32x001	0.351386	0.245055	0.0334441	0.930261	0.0250511	0.91822	-0.0165412	0.978676
RelB or DinJ-like antitoxin	ZMOp32x002	ZMOp32x002	-0.0381006	0.981131	0.0909901	0.794664	-0.0167058	0.978232	0.163216	0.75304
P-loop containing nucleoside triphosphate hydrolase domain protein	ZMOp32x004	ZMOp32x004	0.25944	0.137644	0.0653426	0.607269	0.144381	0.624553	0.180834	0.543428
hypothetical protein	ZMOp32x005	ZMOp32x005	-0.163299	0.726379	-0.186823	0.623425	0.00121562	0.995043	0.0243766	0.96661
Ca2+-dependent phosphoinositide phospholipase C	ZMOp32x007	ZMOp32x007	0.365588	0.811996	-0.660273	0.145393	-0.637454	0.170492	-0.550235	0.435618
PIN domain protein	ZMOp32x008	ZMOp32x008	0.210885	0.456943	0.0695362	0.593555	0.0478052	0.701286	0.0841363	0.812426
SinI-like DNA-binding domain protein	ZMOp32x009	ZMOp32x009	-0.0748571	0.938614	0.208155	0.406155	0.237544	0.105688	0.204238	0.59371
hypothetical protein	ZMOp32x011	ZMOp32x011	-0.0440197	0.943132	0.115361	0.368995	0.223421	0.434819	0.3026	0.569095
putative IS4/IS5 family transposase	ZMOp32x018	ZMOp32x018	-1.06989	0.782586	0	1	0	1	0	1
MazE antitoxin	ZMOp32x020	ZMOp32x020	0.292512	0.308522	-0.0477511	0.806114	0.275549	0.233434	0.174639	0.445838
MazF toxin	ZMOp32x021	ZMOp32x021	0.157386	0.832587	0.0162392	0.985871	0.271344	0.130112	0.3051	0.641499
SIR2-like protein	ZMOp32x022	ZMOp32x022	-0.0149097	0.982628	0.0728639	0.72192	0.150846	0.653768	0.0614433	0.851445
MTH538 TIR-like domain	ZMOp32x023	ZMOp32x023	0.293035	0.283212	0.194933	0.145419	0.336517	0.101053	0.384536	0.142759
Type III restriction endonuclease subunit R	ZMOp32x025	ZMOp32x025	0.385222	0.0670476	0.151169	0.0797055	0.150462	0.319866	0.197067	0.261162
Type I restriction endonuclease HsdS	ZMOp32x028	ZMOp32x028	0.324621	0.302954	-0.03324	0.867363	-0.0495993	0.842042	-0.115121	0.626432
hypothetical protein	ZMOp33x001	ZMOp33x001	-0.403947	0.65374	-0.210568	0.567239	0.202829	0.669708	0.0472724	0.891265
putative Zeta toxin-like kinase	ZMOp33x002	ZMOp33x002;ZMOp39x023	-0.355141	0.394192	-0.0312099	0.875742	0.161364	0.652635	0.0199261	0.963656
CopG family transcriptional regulator	ZMOp33x003	ZMOp33x003	-0.245571	0.245042	-0.0486895	0.425383	-0.112945	0.669499	-0.101665	0.521788
CobQ/CobB/MinD/ParA nucleotide binding domain protein	ZMOp33x004	ZMOp33x004	0.145908	0.71211	-0.0555337	0.104935	0.0126858	0.956661	0.026336	0.920193
Vibrio phage ICP1 Orf50 family protein	ZMOp33x005	ZMOp33x005	-0.655874	0.691995	0.357798	0.660311	0.265177	0.33748	-0.140917	0.66159
acyl-CoA N-acyltransferase	ZMOp33x006	ZMOp33x006	-0.499313	0.514369	0.0711149	0.827458	0.0446351	0.770371	0.255292	0.640304
LysR family transcription regulator	ZMOp33x008	ZMOp33x008	-0.584055	0.233973	-0.163806	0.621512	-0.371178	0.181496	-0.376967	0.290128
carbamoylase-type amidase	ZMOp33x011	ZMOp33x011	0.0392907	0.95557	-0.12263	0.546644	-0.135529	0.443536	-0.274558	0.396873
2-aminoethylphosphonate--pyruvate transaminase	ZMOp33x012	ZMOp33x012	-0.0372041	0.927078	-0.10603	0.590526	-0.0164591	0.973816	-0.10769	0.569525
AtzE type amidohydrolase	ZMOp33x015	ZMOp33x015	0.0451851	0.886147	-0.0978374	0.386974	-0.0976899	0.695389	0.0069561	0.989913
carboxymuconolactone decarboxylase-like protein	ZMOp33x017	ZMOp33x017	-0.0510216	0.952184	-0.862888	0.182072	-1.01898	0.109534	-0.60934	0.297678
bacterial bifunctional deaminase-reductase C-terminal domain-containing protein	ZMOp33x018	ZMOp33x018	-0.0683924	0.909388	-0.189754	0.415741	-0.0599709	0.757662	-0.0615953	0.686239
LysR family transcription regulator	ZMOp33x019	ZMOp33x019	-0.520437	0.222331	-0.44034	0.109616	-0.22798	0.755804	-0.310939	0.566164
alcohol dehydrogenase-like protein	ZMOp33x021	ZMOp33x021	-0.0196362	0.981072	-0.0267531	0.941462	-0.276772	0.235311	-0.143866	0.438318
NADP-dependent oxidoreductase domain protein	ZMOp33x022	ZMOp33x022	-0.410859	0.398451	-0.493333	0.251005	-0.137597	0.274265	-0.353511	0.227589
NADP-dependent oxidoreductase domain protein	ZMOp33x023	ZMOp33x023	0.0307598	0.891792	-0.0495389	0.620371	-0.00860087	0.982565	0.0403557	0.913424
IS4-like transposase	ZMOp33x024	ZMOp33x024	0.574938	0.720339	-0.244399	0.819538	0.791582	0.668524	0	1
relaxosome protein TraY	ZMOp33x027	ZMOp33x027	0.0252781	0.997374	0.239172	0.644766	0.0148538	0.970628	-0.109222	0.90615
Azospirillum phage Cd Gp10 family protein	ZMOp33x029	ZMOp33x029	-0.0878894	0.599098	-0.254707	0.569331	-0.14485	0.819732	-0.124613	0.84892
hypothetical protein	ZMOp33x031	ZMOp33x031	-0.134312	0.692937	-0.0223153	0.873938	-0.00293032	0.990325	-0.0930284	0.761079
ribonuclease toxin BrnT of type II toxin-antitoxin system	ZMOp33x036	ZMOp33x036	0.620994	0.666396	-0.361401	0.73482	0.560035	0.745569	-0.505595	0.714675
cro/C1-type transcriptional repressor	ZMOp33x037	ZMOp33x037	0.216473	0.743713	0.304992	0.574186	0.252251	0.655561	-0.0401796	0.961523
Lambda repressor-like transcriptional regulator	ZMOp33x038	ZMOp33x038	-0.605009	0.742772	-0.110964	0.932203	-0.20622	0.942868	0	1
hypothetical protein	ZMOp36x009	ZMOp36x009	-0.0597146	0.971913	-0.124451	0.729019	-0.267253	0.330993	0.135132	0.685812
tail sheath protein	ZMOp36x011	ZMOp36x011	-0.316697	0.674757	1.52852	0.132048	-0.885076	0.669828	0.129464	0.8809
tail tube protein	ZMOp36x012	ZMOp36x012	0.132587	0.835627	0.254143	0.315496	0.350009	0.318206	-0.00979869	0.986429
hypothetical protein	ZMOp36x018	ZMOp36x018	0.183264	0.857623	-1.06407	0.208331	0.0403913	0.990689	-0.76713	0.446592
DNA-damage-inducible protein D	ZMOp36x025	ZMOp36x025	-0.210998	0.672314	-0.231431	0.131264	0.0085907	0.973047	-0.108049	0.50778
hypothetical protein	ZMOp36x027	ZMOp36x027	-0.845218	0.376201	-0.318289	0.329972	-0.412882	0.292819	-0.180804	0.583649
hypothetical protein	ZMOp36x028	ZMOp36x028	-0.0307541	0.938587	-0.109729	0.761262	0.0134131	0.975505	-0.0750427	0.857075
Lambda repressor-like DNA-binding domain protein	ZMOp36x029	ZMOp36x029	0.0132688	0.989505	-0.0303497	0.853814	0.226772	0.649821	0.193468	0.870882
toxin HigB-like	ZMOp36x030	ZMOp36x030	-0.941954	0.184376	0.0736834	0.891381	-0.334133	0.511383	0.128354	0.762173
helix-turn-helix XRE super family protein	ZMOp36x031	ZMOp36x031	-0.279697	0.55006	-0.6394	0.0858848	-0.626304	0.615048	0.240897	0.823334
hypothetical protein	ZMOp36x032	ZMOp36x032	-0.378471	0.48895	-0.415723	0.217136	0.113126	0.450591	0.632064	0.427869
abortive infection system protein AbiD/AbiF-like protein	ZMOp36x037	ZMOp36x037	-0.236633	0.835026	0.264077	0.383272	-0.0346273	0.957611	0.309441	0.317689
hypothetical protein	ZMOp36x038	ZMOp36x038	-0.180051	0.636252	-0.199934	0.352563	-0.0921504	0.760243	-0.17112	0.584557
CobQ/CobB/MinD/ParA nucleotide binding domain protein	ZMOp36x039	ZMOp36x039	0.0019652	1	-0.0186679	0.933109	0.0330385	0.8928	-0.0809333	0.454812
Arc-type ribbon-helix-helix	ZMOp36x040	ZMOp36x040	-0.0590089	0.859713	0.229423	0.483836	-0.0545686	0.915563	0.0587851	0.895801
bacteriophage P2 GpN major capsid	ZMOp36x044	ZMOp36x044	-0.531995	0.778151	0.170366	0.918999	0.763626	0.715442	0.160463	0.574578
hypothetical protein	ZMOp39x004	ZMOp39x004	0.0680866	0.921865	0.38244	0.259614	0.0991179	0.846192	0.641819	0.231983
RelB antitoxin/Antitoxin DinJ family toxin	ZMOp39x005	ZMOp39x005	-0.598181	0.461342	-0.0747986	0.938669	-0.0788269	0.877304	0.0151876	0.986714
YafQ-like toxin	ZMOp39x006	ZMOp39x006	0.11603	0.965011	0.30316	0.144292	0.229266	0.391666	0.199256	0.403392
NAD(P)-dependent oxidoreductase	ZMOp39x008	ZMOp39x008	0.472154	0.129046	0.525728	0.0106667	0.425346	0.184503	0.447336	0.148178
putative partitioning protein ParA ATPase	ZMOp39x009	ZMOp39x009	0.142614	0.46843	0.138261	0.331152	0.354699	0.150074	0.215805	0.334696
putative partitioning protein ParB	ZMOp39x010	ZMOp39x010	-0.0637194	0.965262	-0.060641	0.750514	0.306098	0.247154	-0.135321	0.705602
ABC transporte ATPase	ZMOp39x015	ZMOp39x015	0.0680923	0.72312	0.197435	0.145656	0.135466	0.653513	0.201272	0.505956
ABC transporter permease	ZMOp39x016	ZMOp39x016	-0.0782223	0.861484	-0.142083	0.88311	0.378337	0.760356	-0.145941	0.777155
secreted lipase	ZMOp39x018	ZMOp39x018	-0.00892639	0.979463	-0.225287	0.10582	-0.209272	0.285995	-0.247971	0.364826
hypothetical protein	ZMOp39x020	ZMOp39x020	0.124022	0.937683	-0.237443	0.734265	-0.106388	0.830049	-0.141687	0.883657
death on curing (Doc) protein	ZMOp39x021	ZMOp39x021	0.0265897	0.990044	-0.198628	0.919486	-0.0893561	0.875611	0.443132	0.228434
ParG family protein	ZMOp39x025	ZMOp39x025	1.10797	0.45198	0.923567	0.237784	-0.04566	0.969241	0.232166	0.677571
outermembrane autotransporter	ZMOp39x027	ZMOp39x027	-1.4037	0.036	-1.31649	0.026963	-1.14693	0.105836	-1.06216	0.193091
hypothetical protein	ZMOp39x030	ZMOp39x030	-0.628234	0.398066	-0.466202	0.0283478	-0.0679862	0.87511	-0.256233	0.623218
Alpha/Beta hydrolase fold	ZMOp39x031	ZMOp39x031	0.104499	0.776397	-0.0580438	0.804775	-0.0573444	0.920706	-0.107784	0.837808
hypothetical protein	ZMOp39x033	ZMOp39x033;ZMOp32x015	-0.0970478	0.981946	0	1	0	1	0	1
XRE family transcriptional regulator	ZMOp39x034	ZMOp39x034	0.0502205	0.690527	0.0829582	0.653905	0.263826	0.178	-0.00858625	0.981878

## Sheet: LFQ
Protein Group	SynH3- T1 Rep1	SynH3- T1 Rep2	SynH3- T1 Rep3	SynH3- T2 Rep1	SynH3- T2 Rep2	SynH3- T2 Rep3	SynH3- T3 Rep1	SynH3- T3 Rep2	SynH3- T3 Rep3	SynH3- T4 Rep1	SynH3- T4 Rep2	SynH3- T4 Rep3	SynH3 T1 Rep1	SynH3 T1 Rep2	SynH3 T1 Rep3	SynH3 T2 Rep1	SynH3 T2 Rep2	SynH3 T2 Rep3	SynH3 T3 Rep1	SynH3 T3 Rep2	SynH3 T3 Rep3	SynH3 T4 Rep1	SynH3 T4 Rep2	SynH3 T4 Rep3
b0008	2.9874e+10	2.9098e+10	2.9806e+10	3.3883e+10	3.476e+10	3.3819e+10	3.3523e+10	3.2942e+10	3.43e+10	3.056e+10	3.2516e+10	3.3348e+10	3.186e+10	3.6453e+10	3.5455e+10	3.9549e+10	3.9111e+10	3.9956e+10	3.6473e+10	3.8e+10	4.0292e+10	3.3103e+10	3.9067e+10	3.9078e+10
b2935	2.1614e+10	2.1308e+10	2.2077e+10	2.2553e+10	2.4453e+10	2.4164e+10	2.3216e+10	2.3453e+10	2.3999e+10	2.1602e+10	2.3436e+10	2.2547e+10	2.3007e+10	2.5813e+10	2.6661e+10	2.759e+10	2.6176e+10	2.8516e+10	2.6726e+10	2.5446e+10	3.0665e+10	2.2094e+10	2.6371e+10	2.4741e+10
b3564	8.63089e+09	8.1425e+09	8.1526e+09	9.4083e+09	9.6347e+09	9.51711e+09	9.67329e+09	8.80081e+09	1.0154e+10	8.71351e+09	8.62941e+09	9.13521e+09	8.5021e+09	9.73171e+09	9.5759e+09	9.65781e+09	1.0373e+10	1.0597e+10	9.2094e+09	1.0412e+10	1.0534e+10	9.15751e+09	1.0428e+10	9.34251e+09
b3565	5.3287e+10	5.14681e+10	5.8877e+10	6.2843e+10	5.641e+10	6.2002e+10	6.24151e+10	5.748e+10	6.1422e+10	5.796e+10	5.96021e+10	5.94989e+10	6.2374e+10	6.4633e+10	7.1717e+10	7.2033e+10	7.1962e+10	7.4731e+10	6.942e+10	6.71711e+10	7.27589e+10	6.0261e+10	7.28581e+10	6.28599e+10
cat	1.0127e+09	9.8187e+08	1.1296e+09	1.262e+09	1.2292e+09	1.5104e+09	1.2956e+09	1.2831e+09	1.769e+09	1.3575e+09	1.4489e+09	1.2587e+09	9.9753e+08	1.1125e+09	1.4859e+09	1.6405e+09	1.7858e+09	1.6313e+09	1.5696e+09	1.5265e+09	1.5118e+09	1.4483e+09	1.8566e+09	1.4967e+09
ZMO0003	3.5931e+08	2.733e+08	3.3516e+08	2.9109e+08	2.7391e+08	2.6853e+08	2.5925e+08	2.2685e+08	2.3905e+08	2.4217e+08	1.8078e+08	2.282e+08	3.426e+08	3.701e+08	3.368e+08	2.5647e+08	3.1831e+08	3.2735e+08	2.3972e+08	2.6712e+08	2.3663e+08	1.9844e+08	2.3185e+08	2.3187e+08
ZMO0004	2.106e+09	1.8754e+09	2.0332e+09	1.372e+09	1.1156e+09	1.5585e+09	1.3144e+09	1.3703e+09	1.4165e+09	2.0567e+09	1.8122e+09	1.6663e+09	2.0603e+09	2.3909e+09	2.5614e+09	1.4594e+09	1.5936e+09	1.6066e+09	1.7494e+09	1.4457e+09	1.4832e+09	2.2997e+09	1.9816e+09	2.4352e+09
ZMO0005	1.4787e+09	1.1578e+09	1.392e+09	1.1479e+09	1.008e+09	1.1291e+09	1.0993e+09	1.0312e+09	1.1043e+09	1.2391e+09	1.2209e+09	1.1165e+09	1.3019e+09	1.4332e+09	1.5728e+09	1.1773e+09	1.0878e+09	1.1603e+09	1.1598e+09	1.0461e+09	1.17e+09	1.4606e+09	1.3664e+09	1.3995e+09
ZMO0006	3.6626e+08	3.1186e+08	3.3099e+08	2.5099e+08	2.3381e+08	2.6018e+08	2.4307e+08	1.9257e+08	2.4044e+08	2.2073e+08	1.9207e+08	2.2713e+08	3.2093e+08	3.872e+08	3.824e+08	2.4939e+08	2.4318e+08	2.3111e+08	2.1901e+08	2.3231e+08	2.031e+08	2.109e+08	2.437e+08	1.9959e+08
ZMO0007	1.1823e+09	8.727e+08	1.0866e+09	1.1029e+09	1.1201e+09	1.2687e+09	1.0415e+09	9.82061e+08	1.167e+09	9.40429e+08	9.6165e+08	9.8882e+08	9.4655e+08	1.0278e+09	1.19e+09	1.165e+09	1.1693e+09	1.1128e+09	9.1943e+08	1.0529e+09	9.7324e+08	9.76281e+08	1.1107e+09	1.0147e+09
ZMO0008	4.8338e+09	4.3252e+09	4.3125e+09	3.9691e+09	4.1856e+09	4.081e+09	3.9066e+09	3.7086e+09	4.0711e+09	3.8548e+09	3.7655e+09	4.0072e+09	3.9309e+09	3.5704e+09	4.0969e+09	3.6119e+09	3.6121e+09	3.6478e+09	3.573e+09	3.4185e+09	4.0921e+09	2.8172e+09	3.5794e+09	3.1447e+09
ZMO0009	3.2789e+09	3.3394e+09	3.5693e+09	3.1645e+09	2.6813e+09	3.3103e+09	2.9639e+09	2.9199e+09	3.1361e+09	3.1229e+09	3.2888e+09	3.1089e+09	3.3112e+09	3.658e+09	3.5234e+09	2.9861e+09	2.9512e+09	3.1065e+09	3.2294e+09	2.834e+09	3.0506e+09	3.2743e+09	3.3302e+09	3.286e+09
ZMO0011	7.6624e+07	8.83239e+07	6.7623e+07	6.7146e+07	6.5617e+07	5.9911e+07	6.8678e+07	7.214e+07	4.9539e+07	9.09889e+07	8.89541e+07	7.7419e+07	7.3376e+07	6.966e+07	6.6399e+07	7.0577e+07	7.5093e+07	7.5351e+07	7.6383e+07	7.239e+07	7.3256e+07	1.0951e+08	8.7634e+07	1.0841e+08
ZMO0012	3.1599e+07	3.4897e+07	4.193e+07	4.1762e+07	3.3907e+07	3.0472e+07	3.932e+07	3.9366e+07	3.5645e+07	4.7619e+07	3.7117e+07	3.8277e+07	4.0514e+07	4.8961e+07	3.4835e+07	4.4169e+07	4.0264e+07	4.3307e+07	4.1222e+07	3.8837e+07	4.0651e+07	5.1749e+07	4.0085e+07	4.6539e+07
ZMO0013	1.4566e+08	1.3834e+08	1.8217e+08	1.1141e+08	1.1681e+08	1.471e+08	1.0156e+08	1.032e+08	1.3411e+08	1.1139e+08	1.1509e+08	1.2142e+08	1.2714e+08	3.6216e+08	1.9106e+08	1.3454e+08	1.3295e+08	1.3945e+08	1.1746e+08	1.0532e+08	1.2361e+08	1.3911e+08	1.3278e+08	1.3208e+08
ZMO0014	5.2041e+08	6.0188e+08	6.7899e+08	7.0665e+08	6.8824e+08	9.2274e+08	7.0212e+08	7.5483e+08	8.447e+08	6.0163e+08	6.6704e+08	6.3917e+08	5.5071e+08	6.7686e+08	5.1089e+08	6.4474e+08	7.3432e+08	6.6873e+08	6.0847e+08	6.7477e+08	5.6618e+08	6.8314e+08	6.5882e+08	7.663e+08
ZMO0015	2.3095e+08	2.8832e+08	2.5437e+08	2.4624e+08	2.4768e+08	2.5581e+08	3.7314e+08	4.3826e+08	4.4098e+08	8.201e+08	1.0298e+09	7.3568e+08	2.6573e+08	1.4885e+08	2.9785e+08	3.03e+08	3.0474e+08	3.3629e+08	4.9692e+08	4.5369e+08	5.9818e+08	7.0285e+08	5.9603e+08	7.8607e+08
ZMO0016	6.0176e+09	6.7607e+09	6.53509e+09	7.58029e+09	7.2354e+09	7.66219e+09	7.95731e+09	8.13559e+09	7.9616e+09	7.59121e+09	8.3786e+09	8.234e+09	5.9702e+09	7.02671e+09	7.1171e+09	9.0731e+09	8.86731e+09	9.1141e+09	8.8562e+09	8.7668e+09	1.0409e+10	7.4276e+09	9.13369e+09	9.0354e+09
ZMO0017	5.9354e+08	5.2308e+08	5.6552e+08	5.189e+08	4.6779e+08	5.2216e+08	4.8462e+08	4.6398e+08	5.6079e+08	5.3863e+08	4.9801e+08	4.9248e+08	4.9997e+08	5.8837e+08	4.8973e+08	5.2988e+08	5.3293e+08	4.7188e+08	4.6835e+08	4.6382e+08	5.3326e+08	6.5554e+08	5.8849e+08	6.2557e+08
ZMO0018	2.10743e+07	7.25837e+06	1.27445e+07	5.24977e+06	9.92661e+06	4.29885e+06	9.50162e+06	1.898e+07	9.14565e+06	3.95164e+06	1.65051e+07	1.70319e+07	1.15669e+07	3.6799e+06	1.41289e+07	5.73486e+06	7.54368e+06	8.34837e+06	1.94803e+07	1.41171e+07	7.14995e+06	2.80824e+07	8.25891e+06	5.40951e+06
ZMO0019	1.0099e+09	8.394e+08	8.245e+08	8.673e+08	7.7991e+08	7.576e+08	8.3303e+08	8.356e+08	7.7008e+08	9.8319e+08	9.2888e+08	9.6067e+08	8.2049e+08	9.34889e+08	8.8053e+08	7.9194e+08	8.3275e+08	7.9501e+08	8.0897e+08	8.5038e+08	8.7496e+08	9.8998e+08	9.16071e+08	9.99189e+08
ZMO0020	1.4096e+09	1.3255e+09	1.2115e+09	1.3978e+09	1.4005e+09	1.3776e+09	1.392e+09	1.325e+09	1.2914e+09	1.286e+09	1.2444e+09	1.4059e+09	1.3242e+09	1.612e+09	1.1403e+09	1.387e+09	1.5956e+09	1.7087e+09	1.4896e+09	1.7776e+09	1.4329e+09	1.24e+09	1.6557e+09	1.4159e+09
ZMO0021	1.9395e+09	1.8574e+09	1.8371e+09	2.4911e+09	2.4905e+09	2.042e+09	2.7728e+09	2.3835e+09	2.3225e+09	2.3555e+09	2.039e+09	2.3973e+09	2.2217e+09	2.0315e+09	2.2034e+09	2.2758e+09	2.6598e+09	2.6481e+09	2.4767e+09	3.3772e+09	2.7132e+09	2.1545e+09	2.657e+09	2.234e+09
ZMO0022	6.3117e+08	6.0412e+08	7.6931e+08	8.62011e+08	7.4894e+08	7.456e+08	8.8113e+08	8.4027e+08	7.6809e+08	7.886e+08	5.8784e+08	7.6247e+08	6.9295e+08	1.0012e+09	6.9337e+08	6.3532e+08	1.0108e+09	9.632e+08	8.4146e+08	1.1305e+09	9.1887e+08	6.2004e+08	9.8278e+08	7.8051e+08
ZMO0026	6.9763e+07	7.7589e+07	6.569e+07	3.282e+07	3.6471e+07	4.6755e+07	2.3213e+07	2.4196e+07	3.3596e+07	8.2708e+06	9.2812e+06	6.1937e+06	8.9567e+07	5.4964e+07	8.6891e+07	5.1801e+07	3.2629e+07	3.24e+07	2.599e+07	2.3884e+07	1.6441e+07	7.6845e+06	8.5314e+06	1.87714e+07
ZMO0027	3.7922e+09	4.1609e+09	4.2614e+09	3.6338e+09	3.7236e+09	3.6066e+09	3.4599e+09	3.3397e+09	3.591e+09	2.89e+09	2.9868e+09	3.1539e+09	4.8909e+09	6.02639e+09	5.3531e+09	4.1947e+09	4.3596e+09	4.5041e+09	3.6771e+09	3.9995e+09	3.8618e+09	3.0053e+09	4.0102e+09	3.3093e+09
ZMO0028	9.90051e+07	9.5915e+07	1.0042e+08	1.053e+08	7.3018e+07	9.9247e+07	9.76639e+07	9.3837e+07	1.0462e+08	1.0155e+08	1.0064e+08	1.0299e+08	9.9869e+07	9.811e+07	1.0585e+08	8.7673e+07	8.4773e+07	9.036e+07	9.37411e+07	8.9733e+07	1.0063e+08	1.1144e+08	1.0758e+08	1.1562e+08
ZMO0029	3.6685e+07	2.3468e+07	6.013e+07	3.5038e+07	2.3609e+07	3.7926e+07	2.5325e+07	2.3246e+07	1.6026e+07	4.2512e+07	2.8544e+07	3.0645e+07	3.604e+07	3.7526e+07	2.5548e+07	1.18185e+07	2.4446e+07	2.7914e+07	3.0073e+07	2.3975e+07	4.68881e+06	2.2131e+07	2.4035e+07	2.0835e+07
ZMO0030	2.8774e+08	2.4232e+08	2.5589e+08	2.8739e+08	2.685e+08	3.0139e+08	2.8228e+08	2.2749e+08	2.9661e+08	2.8511e+08	2.3801e+08	2.5397e+08	2.4337e+08	2.9569e+08	2.8274e+08	3.2831e+08	3.3705e+08	2.9487e+08	2.8343e+08	3.396e+08	2.4044e+08	2.5354e+08	3.5665e+08	2.7937e+08
ZMO0031	1.1161e+08	1.1881e+08	1.3714e+08	7.4635e+07	6.364e+07	8.1036e+07	6.777e+07	6.4263e+07	7.5267e+07	8.0378e+07	6.7383e+07	8.0427e+07	1.2037e+08	8.3818e+07	7.9369e+07	5.874e+07	4.6918e+07	5.0467e+07	6.1784e+07	5.2088e+07	5.1041e+07	6.2075e+07	6.0278e+07	5.619e+07
ZMO0033	1.7966e+07	1.9046e+07	1.7708e+07	1.6638e+07	1.3265e+07	1.5985e+07	1.5021e+07	1.7486e+07	1.5277e+07	1.8361e+07	1.7e+07	1.6569e+07	1.15209e+07	1.2374e+07	1.4873e+07	6.77316e+06	1.7009e+07	1.5082e+07	1.67982e+07	1.6733e+07	1.3663e+07	1.49867e+07	1.5995e+07	1.9994e+07
ZMO0035	5.214e+08	5.7065e+08	6.335e+08	6.4334e+08	6.1848e+08	6.3357e+08	4.7449e+08	5.2078e+08	4.9585e+08	1.5998e+08	1.5443e+08	1.0394e+08	7.188e+08	6.2877e+08	6.6368e+08	8.4043e+08	9.1054e+08	8.244e+08	6.4603e+08	6.4112e+08	4.8533e+08	1.9217e+08	1.2905e+08	1.4819e+08
ZMO0036	3.5714e+07	2.228e+07	2.6946e+07	3.3633e+07	3.3801e+07	3.7808e+07	3.8824e+07	3.2944e+07	4.0144e+07	3.0306e+07	4.022e+07	3.6131e+07	2.6092e+07	2.1163e+07	2.8803e+07	4.6715e+07	3.3702e+07	3.0216e+07	3.7204e+07	4.4674e+07	3.4242e+07	4.4228e+07	3.0885e+07	3.722e+07
ZMO0037	3.5833e+08	3.1732e+08	3.1345e+08	3.9509e+08	3.8201e+08	3.5516e+08	3.9836e+08	3.7495e+08	3.8038e+08	4.4437e+08	4.888e+08	4.5575e+08	3.2062e+08	1.8226e+08	3.2837e+08	3.8605e+08	3.5369e+08	4.3083e+08	4.5241e+08	4.3451e+08	5.2803e+08	5.6814e+08	4.2604e+08	5.8915e+08
ZMO0038	2.3925e+09	2.6721e+09	2.8763e+09	3.1303e+09	3.3716e+09	3.6783e+09	4.1878e+09	4.9217e+09	5.33291e+09	4.8068e+09	5.82969e+09	4.8282e+09	2.6896e+09	2.7248e+09	3.3942e+09	4.0516e+09	3.892e+09	4.2829e+09	5.4975e+09	4.2626e+09	5.7768e+09	5.3432e+09	5.06171e+09	6.6542e+09
ZMO0039	1.1179e+08	1.0086e+08	9.6683e+07	7.8372e+07	8.1136e+07	7.0842e+07	6.4311e+07	5.7688e+07	5.2529e+07	5.9023e+07	6.3017e+07	5.495e+07	8.9325e+07	8.5946e+07	8.9748e+07	7.837e+07	7.3991e+07	6.9643e+07	6.1623e+07	5.349e+07	5.824e+07	8.0152e+07	6.5084e+07	8.2465e+07
ZMO0040	6.2704e+07	7.6704e+07	7.3804e+07	7.2458e+07	6.4876e+07	6.4003e+07	7.1481e+07	6.6256e+07	6.8689e+07	8.4427e+07	9.52151e+07	7.9567e+07	7.7222e+07	7.0589e+07	8.013e+07	7.9457e+07	6.6058e+07	7.2682e+07	8.1594e+07	7.3377e+07	7.7456e+07	1.0279e+08	7.8279e+07	9.3774e+07
ZMO0041	7.5425e+08	7.0544e+08	6.8656e+08	6.2346e+08	6.5655e+08	7.1014e+08	6.0777e+08	6.0548e+08	6.6529e+08	5.6186e+08	5.7516e+08	6.2016e+08	5.6606e+08	7.3928e+08	6.4994e+08	6.5848e+08	7.0043e+08	7.5972e+08	6.4666e+08	6.8394e+08	6.4393e+08	5.181e+08	6.5018e+08	6.1874e+08
ZMO0043	7.1815e+07	5.0118e+07	6.026e+07	5.0067e+07	4.7453e+07	4.174e+07	4.274e+07	4.1882e+07	4.187e+07	5.3194e+07	5.2733e+07	5.0302e+07	5.5329e+07	7.4368e+07	5.6194e+07	5.1517e+07	4.5758e+07	4.9462e+07	5.2459e+07	4.3318e+07	5.2482e+07	6.7748e+07	5.7643e+07	6.7777e+07
ZMO0044	1.3049e+07	2.9939e+07	2.0593e+07	2.046e+07	2.2994e+07	1.9465e+07	1.2706e+07	1.0635e+07	1.3407e+07	1.60973e+07	6.6296e+06	1.0453e+07	2.5255e+07	3.6511e+07	1.3867e+07	7.4358e+06	1.7275e+07	8.964e+06	9.64395e+06	1.4338e+07	1.2528e+07	2.12031e+07	1.4151e+07	1.1408e+07
ZMO0050	1.16e+07	9.6838e+06	7.7734e+06	9.9373e+06	9.5622e+06	7.8388e+06	1.0979e+07	1.0429e+07	1.0275e+07	1.4173e+07	1.2322e+07	1.5455e+07	8.3893e+06	8.4235e+06	9.84149e+06	8.1299e+06	9.66709e+06	1.0087e+07	9.8029e+06	1.3607e+07	1.008e+07	1.1046e+07	1.52786e+07	1.1221e+07
ZMO0054	7.6125e+06	5.0549e+06	6.1921e+06	8.3852e+06	1.2688e+07	5.2985e+06	9.94249e+06	9.7116e+06	7.1735e+06	6.7283e+06	1.0715e+07	8.0691e+06	7.16284e+06	7.20159e+06	1.98347e+07	2.28218e+06	9.901e+06	8.6023e+06	8.7786e+06	1.4425e+07	1.593e+07	1.1897e+07	7.9827e+06	1.4478e+07
ZMO0056	2.5325e+09	2.7884e+09	2.5683e+09	2.3931e+09	2.6857e+09	2.444e+09	2.424e+09	2.4148e+09	2.5493e+09	2.1026e+09	2.1849e+09	2.2653e+09	2.6649e+09	2.6849e+09	2.7599e+09	2.5535e+09	2.6149e+09	2.7227e+09	2.4964e+09	2.5038e+09	2.6613e+09	2.0455e+09	2.6086e+09	2.3151e+09
ZMO0057	3.3455e+08	3.1953e+08	3.3438e+08	3.7177e+08	3.4552e+08	3.4939e+08	3.5627e+08	3.4789e+08	3.623e+08	3.9914e+08	4.0029e+08	3.9103e+08	2.7968e+08	3.4796e+08	3.6369e+08	3.9223e+08	3.5567e+08	3.5506e+08	3.9194e+08	3.8159e+08	4.4063e+08	3.9755e+08	3.9621e+08	4.295e+08
ZMO0059	1.1007e+08	1.3907e+08	1.2307e+08	1.5178e+08	1.3765e+08	1.7357e+08	1.7539e+08	1.6087e+08	1.8602e+08	1.8412e+08	1.7761e+08	1.5901e+08	1.4217e+08	1.558e+08	1.6253e+08	1.919e+08	1.8484e+08	1.8799e+08	2.054e+08	1.7487e+08	1.8439e+08	2.2582e+08	2.3164e+08	2.2153e+08
ZMO0060	1.1131e+08	1.0052e+08	1.1804e+08	8.9838e+07	1.0461e+08	8.5809e+07	8.3832e+07	7.909e+07	6.771e+07	8.4851e+07	1.0751e+08	8.3198e+07	1.359e+08	1.3478e+08	1.0651e+08	1.0697e+08	7.8533e+07	1.0692e+08	1.0738e+08	8.4225e+07	1.1416e+08	1.2413e+08	9.2176e+07	1.0606e+08
ZMO0061	1.2449e+08	1.1195e+08	1.4385e+08	9.31149e+07	7.1337e+07	9.6118e+07	7.33e+07	6.7706e+07	8.5908e+07	4.9218e+07	4.0661e+07	4.6164e+07	9.3985e+07	1.2616e+08	1.0841e+08	6.7822e+07	7.0251e+07	6.3386e+07	5.3963e+07	6.0418e+07	4.9097e+07	4.4096e+07	4.4549e+07	3.1639e+07
ZMO0062	6.8872e+08	6.7158e+08	8.1342e+08	7.7664e+08	6.9577e+08	8.1968e+08	7.3965e+08	7.0222e+08	7.8572e+08	7.3514e+08	6.8371e+08	7.6888e+08	5.6295e+08	7.9117e+08	7.2044e+08	6.2058e+08	6.8672e+08	6.7595e+08	5.8988e+08	6.8925e+08	6.2295e+08	7.67e+08	7.3468e+08	7.3838e+08
ZMO0064	1.1217e+08	1.4478e+08	9.2114e+07	9.4898e+07	6.361e+07	9.1712e+07	8.5793e+07	5.9298e+07	6.99528e+06	7.3284e+07	5.4854e+07	6.8405e+07	7.5025e+07	6.4293e+07	8.92591e+07	9.5619e+07	5.7685e+07	6.4575e+07	8.0777e+07	7.4423e+07	6.7441e+07	8.25981e+07	7.8754e+07	9.3092e+07
ZMO0068	3.8042e+08	3.1121e+08	2.7613e+08	3.2941e+08	3.2016e+08	2.9956e+08	2.7411e+08	2.2878e+08	2.3416e+08	1.0373e+08	5.4646e+07	1.285e+08	2.641e+08	3.2542e+08	2.7504e+08	2.5887e+08	2.4737e+08	2.7873e+08	2.0708e+08	2.3356e+08	2.212e+08	7.2839e+07	7.7428e+07	7.1801e+07
ZMO0070	4.8873e+08	5.4073e+08	3.9845e+08	4.3873e+08	5.4173e+08	4.7189e+08	4.625e+08	5.0325e+08	4.7596e+08	3.8233e+08	4.5869e+08	4.8142e+08	5.1559e+08	5.0632e+08	4.7259e+08	5.0929e+08	5.6463e+08	5.7074e+08	5.4102e+08	5.5693e+08	6.4387e+08	4.7388e+08	5.0533e+08	5.3249e+08
ZMO0072	2.9948e+08	2.7475e+08	3.1473e+08	3.1488e+08	3.3922e+08	3.4062e+08	3.433e+08	4.1115e+08	3.7635e+08	3.9368e+08	4.7763e+08	4.2954e+08	2.4997e+08	2.0714e+08	2.9981e+08	3.1557e+08	2.9298e+08	2.8774e+08	3.4535e+08	3.3407e+08	3.4896e+08	3.8845e+08	3.7691e+08	3.7329e+08
ZMO0073	5.6358e+08	5.2035e+08	5.2612e+08	5.9293e+08	6.1962e+08	6.066e+08	6.5884e+08	6.5641e+08	6.6783e+08	7.3684e+08	9.649e+08	7.4499e+08	6.0069e+08	4.7324e+08	6.0344e+08	6.5317e+08	5.8877e+08	5.9667e+08	6.4769e+08	6.4699e+08	6.9101e+08	6.8485e+08	7.5402e+08	7.4043e+08
ZMO0074	6.1549e+07	5.1692e+07	5.5092e+07	6.4487e+07	6.1885e+07	6.8486e+07	5.0136e+07	4.6628e+07	7.2405e+07	6.6027e+07	6.1715e+07	5.4116e+07	4.277e+07	4.6667e+07	5.8274e+07	6.3415e+07	5.268e+07	5.5326e+07	5.5336e+07	5.0237e+07	6.0001e+07	6.7103e+07	6.0641e+07	6.2121e+07
ZMO0075	9.7515e+08	9.1271e+08	9.6736e+08	9.6958e+08	8.7072e+08	9.9717e+08	9.7475e+08	9.857e+08	9.6347e+08	1.1373e+09	1.1768e+09	1.1166e+09	8.2507e+08	9.57821e+08	8.3741e+08	9.8198e+08	9.8413e+08	8.8897e+08	1.0401e+09	9.763e+08	1.0309e+09	1.2195e+09	1.0853e+09	1.2522e+09
ZMO0077	6.3326e+08	6.8546e+08	7.3932e+08	3.9897e+08	3.9232e+08	3.973e+08	2.8769e+08	2.7762e+08	3.0136e+08	3.3624e+08	3.464e+08	3.496e+08	6.7255e+08	7.4249e+08	7.3582e+08	5.4756e+08	5.0805e+08	5.4793e+08	5.0587e+08	4.7305e+08	5.6136e+08	5.8704e+08	5.3999e+08	6.0226e+08
ZMO0078	5.4702e+08	4.7489e+08	3.8014e+08	4.1057e+08	4.3681e+08	3.8076e+08	3.7723e+08	3.6669e+08	3.5556e+08	4.07e+08	4.1762e+08	4.1919e+08	4.336e+08	3.3968e+08	4.3183e+08	3.7909e+08	3.689e+08	4.2135e+08	3.8807e+08	3.9406e+08	4.8296e+08	4.791e+08	4.4868e+08	5.0878e+08
ZMO0079	1.4338e+08	7.671e+07	1.004e+08	1.1736e+08	1.3149e+08	1.1661e+08	1.1622e+08	9.8061e+07	1.29e+08	8.3507e+07	9.2231e+07	9.9089e+07	1.347e+08	8.4113e+07	1.1156e+08	1.156e+08	1.4028e+08	1.0518e+08	1.1173e+08	1.3669e+08	1.1794e+08	9.5191e+07	1.0893e+08	9.3686e+07
ZMO0080	2.6656e+07	2.9986e+07	1.8548e+07	2.0742e+07	1.4739e+07	1.7632e+07	1.6507e+07	1.1158e+07	1.6367e+07	1.8382e+07	1.8511e+07	1.8822e+07	3.0334e+07	3.2881e+07	2.6874e+07	1.9276e+07	2.0879e+07	2.1894e+07	2.0258e+07	2.4223e+07	2.0299e+07	2.7934e+07	2.5064e+07	2.5873e+07
ZMO0081	1.6688e+08	1.7994e+08	1.8962e+08	1.6192e+08	1.6843e+08	1.4338e+08	1.4542e+08	1.1489e+08	1.2206e+08	1.302e+08	1.0588e+08	1.6707e+08	2.6804e+08	2.882e+08	2.4374e+08	1.6133e+08	2.1108e+08	2.1432e+08	1.7134e+08	1.882e+08	1.9626e+08	1.895e+08	1.7731e+08	2.029e+08
ZMO0082	5.9674e+07	5.8268e+07	5.9824e+07	4.2122e+07	3.6232e+07	3.654e+07	3.2596e+07	3.1609e+07	3.2905e+07	4.0035e+07	4.2703e+07	3.8198e+07	8.0234e+07	9.18601e+07	9.95881e+07	5.3676e+07	4.8158e+07	5.1029e+07	5.1547e+07	4.8614e+07	5.092e+07	7.1458e+07	5.9122e+07	6.6335e+07
ZMO0083	5.2735e+07	4.0671e+07	5.4269e+07	1.6361e+07	1.4e+07	3.877e+07	8.6011e+06	1.6442e+07	2.4717e+07	1.777e+07	2.3328e+07	1.0992e+07	1.1279e+08	1.2059e+08	1.5419e+08	4.4545e+07	2.3466e+07	2.015e+07	2.4005e+07	1.7525e+07	2.6548e+07	3.3245e+07	2.037e+07	2.8452e+07
ZMO0085	1.0725e+08	8.3036e+07	6.5241e+07	5.5772e+07	4.6251e+07	4.7372e+07	4.969e+07	4.8114e+07	4.2837e+07	6.0451e+07	4.4795e+07	5.0566e+07	1.0381e+08	1.8235e+08	9.1782e+07	5.2023e+07	5.8275e+07	6.5463e+07	5.8956e+07	5.8007e+07	6.3415e+07	6.2743e+07	5.9256e+07	6.8813e+07
ZMO0086	6.4589e+08	6.9558e+08	7.905e+08	7.9751e+08	7.6718e+08	8.1909e+08	7.9483e+08	8.7857e+08	8.2927e+08	9.6693e+08	9.9849e+08	1.0086e+09	7.3271e+08	6.9935e+08	7.5272e+08	7.4101e+08	7.5381e+08	8.0295e+08	8.6939e+08	7.8503e+08	8.3569e+08	9.6839e+08	8.5138e+08	1.0169e+09
ZMO0087	2.8185e+07	1.9781e+07	2.906e+07	3.077e+07	3.0572e+07	3.6132e+07	3.8568e+07	4.7296e+07	3.6196e+07	2.3888e+07	3.7064e+07	3.3692e+07	2.2467e+07	1.9199e+07	1.75e+07	3.0273e+07	2.832e+07	1.9027e+07	3.4184e+07	2.934e+07	3.0348e+07	2.8956e+07	2.2259e+07	3.9028e+07
ZMO0090	3.4639e+09	4.0005e+09	4.4446e+09	4.031e+09	4.1436e+09	4.1813e+09	4.2185e+09	4.0067e+09	4.3893e+09	3.6553e+09	3.7383e+09	4.0917e+09	4.5752e+09	5.5611e+09	5.517e+09	4.5836e+09	4.4829e+09	5.1341e+09	4.2833e+09	4.4044e+09	4.79221e+09	3.4345e+09	4.1706e+09	3.9818e+09
ZMO0092	1.21e+08	1.1793e+08	1.4472e+08	1.0567e+08	1.1045e+08	1.2151e+08	9.1835e+07	1.098e+08	1.2263e+08	1.4446e+08	1.4774e+08	1.2273e+08	1.2203e+08	1.4313e+08	1.5917e+08	1.1756e+08	1.3954e+08	1.4909e+08	1.3272e+08	1.326e+08	1.4697e+08	1.7732e+08	1.4997e+08	1.814e+08
ZMO0094	4.2707e+08	4.9921e+08	4.6233e+08	3.5039e+08	3.9979e+08	3.7286e+08	3.4443e+08	3.8057e+08	3.2699e+08	4.2449e+08	4.681e+08	4.8189e+08	4.4921e+08	4.7474e+08	4.4236e+08	3.6793e+08	3.4945e+08	4.1952e+08	3.8121e+08	3.6264e+08	4.5469e+08	5.2266e+08	4.3415e+08	4.9961e+08
ZMO0101	6.3327e+07	6.5829e+07	8.997e+07	1.2499e+08	8.5595e+07	1.3087e+08	1.1904e+08	9.5899e+07	1.3749e+08	1.3225e+08	1.1033e+08	1.3092e+08	6.7573e+07	5.8198e+07	6.2708e+07	9.2102e+07	1.0673e+08	8.4859e+07	9.7344e+07	1.0188e+08	8.3187e+07	1.0523e+08	1.29e+08	1.045e+08
ZMO0103	9.9396e+08	9.5045e+08	9.55229e+08	7.3221e+08	6.1894e+08	7.6635e+08	6.6422e+08	6.4483e+08	6.5957e+08	4.5966e+08	4.1163e+08	3.9791e+08	6.5154e+08	9.8782e+08	7.806e+08	5.9865e+08	6.4417e+08	5.8681e+08	5.2073e+08	5.8494e+08	4.9829e+08	4.8054e+08	3.8565e+08	3.9227e+08
ZMO0105	2.835e+09	3.1267e+09	2.9825e+09	2.6469e+09	2.642e+09	2.5218e+09	3.1454e+09	2.9617e+09	2.9415e+09	4.1374e+09	4.8346e+09	4.4545e+09	2.9044e+09	2.7183e+09	3.0701e+09	2.506e+09	2.801e+09	2.8836e+09	3.2181e+09	3.2844e+09	3.9154e+09	4.0435e+09	3.8905e+09	4.6798e+09
ZMO0106	1.4107e+09	1.3487e+09	1.4874e+09	1.353e+09	1.3149e+09	1.3988e+09	1.4625e+09	1.4289e+09	1.7527e+09	1.8133e+09	2.136e+09	1.8673e+09	1.4126e+09	1.4641e+09	1.4453e+09	1.2782e+09	1.3693e+09	1.353e+09	1.4166e+09	1.4882e+09	1.6484e+09	1.6576e+09	1.6915e+09	1.8032e+09
ZMO0107	1.8022e+08	1.5599e+08	1.751e+08	1.5384e+08	1.3668e+08	1.6427e+08	1.6508e+08	1.5774e+08	1.5293e+08	1.6132e+08	1.5361e+08	1.6521e+08	1.5117e+08	1.4364e+08	1.2474e+08	1.2239e+08	1.3669e+08	1.3583e+08	1.3048e+08	1.3453e+08	1.2311e+08	1.6242e+08	1.3604e+08	1.2935e+08
ZMO0110	7.2768e+08	1.2231e+09	1.3498e+09	4.55962e+06	2.1378e+09	1.07672e+07	1.0822e+08	2.4359e+08	3.0834e+07	2.42906e+07	1.2778e+09	3.77586e+06	1.6217e+09	1.2624e+09	2.2105e+09	1.34794e+07	7.84287e+06	1.329e+09	7.4279e+06	2.6097e+09	1.02934e+07	1.5357e+09	7.66713e+06	1.4559e+09
ZMO0111	1.1168e+09	1.2117e+09	1.194e+09	9.8784e+08	9.9629e+08	1.055e+09	1.0082e+09	1.0769e+09	1.0521e+09	1.1721e+09	1.2423e+09	1.1073e+09	1.209e+09	1.3317e+09	1.3231e+09	1.1584e+09	1.1435e+09	1.2082e+09	1.2216e+09	1.228e+09	1.2974e+09	1.4624e+09	1.3529e+09	1.505e+09
ZMO0112	7.1491e+07	8.3488e+07	7.8776e+07	8.258e+07	8.3604e+07	8.881e+07	5.0251e+07	4.6586e+07	5.166e+07	1.2254e+07	1.4421e+07	1.039e+07	1.2252e+08	8.4452e+07	1.5569e+08	1.1538e+08	1.1134e+08	1.3526e+08	6.7412e+07	4.0235e+07	6.2926e+07	2.2093e+07	9.4031e+06	1.3097e+07
ZMO0113	6.007e+08	6.94e+08	6.081e+08	7.2383e+08	7.4993e+08	7.4292e+08	6.6693e+08	7.3357e+08	7.4039e+08	7.6663e+08	9.2152e+08	7.6665e+08	4.6113e+08	5.4714e+08	5.2639e+08	8.0682e+08	6.7131e+08	7.5177e+08	8.6762e+08	6.4589e+08	8.2495e+08	9.8369e+08	7.584e+08	9.0404e+08
ZMO0114	4.237e+08	5.5015e+08	3.7932e+08	4.512e+08	6.1285e+08	4.2466e+08	5.1363e+08	6.1151e+08	4.9631e+08	5.411e+08	7.2036e+08	6.2389e+08	3.6452e+08	3.2469e+08	3.1107e+08	4.9103e+08	4.3252e+08	5.6236e+08	6.1735e+08	5.1486e+08	6.7726e+08	7.6976e+08	5.0096e+08	7.6109e+08
ZMO0115	2.1512e+08	2.1598e+08	2.0219e+08	2.3696e+08	2.4761e+08	2.2302e+08	2.2713e+08	2.577e+08	2.3079e+08	2.1836e+08	2.3069e+08	2.0949e+08	1.5353e+08	2.1585e+08	1.636e+08	2.2384e+08	2.1829e+08	2.093e+08	2.1743e+08	1.9828e+08	2.3383e+08	1.9821e+08	1.992e+08	2.1509e+08
ZMO0116	5.513e+07	6.142e+07	5.5561e+07	6.6074e+07	7.5631e+07	7.12e+07	6.7806e+07	8.0845e+07	7.499e+07	7.029e+07	1.0566e+08	7.3754e+07	4.2485e+07	4.3825e+07	4.3093e+07	7.9172e+07	6.186e+07	5.8573e+07	7.48e+07	6.2502e+07	7.2625e+07	1.1138e+08	7.4662e+07	1.0394e+08
ZMO0117	1.9218e+08	1.9723e+08	1.9767e+08	2.0609e+08	1.8803e+08	1.8276e+08	1.7954e+08	1.8049e+08	1.825e+08	1.7057e+08	1.8417e+08	1.5059e+08	2.3611e+08	2.2844e+08	2.4697e+08	1.9271e+08	1.9487e+08	1.8651e+08	2.0661e+08	1.9973e+08	2.207e+08	2.128e+08	2.0605e+08	1.962e+08
ZMO0120	9.4564e+08	1.0519e+09	1.2292e+09	1.0865e+09	1.1226e+09	1.2662e+09	1.0299e+09	1.0746e+09	1.2805e+09	1.0232e+09	1.1386e+09	8.7889e+08	1.2621e+09	1.2926e+09	1.5055e+09	1.2386e+09	1.124e+09	1.1868e+09	1.2068e+09	9.3995e+08	8.624e+08	9.821e+08	1.0831e+09	1.0167e+09
ZMO0121	3.1405e+08	3.9406e+08	3.3822e+08	3.2183e+08	3.5411e+08	3.2964e+08	3.296e+08	3.5925e+08	3.4657e+08	3.9359e+08	4.3492e+08	3.7411e+08	3.2884e+08	3.526e+08	3.2137e+08	3.625e+08	3.3251e+08	3.3562e+08	3.8043e+08	3.5609e+08	3.8976e+08	5.0986e+08	3.8738e+08	4.6714e+08
ZMO0122	9.075e+08	8.3351e+08	8.48e+08	1.0568e+09	1.0261e+09	9.8861e+08	1.3251e+09	1.3606e+09	1.3266e+09	1.2297e+09	1.164e+09	1.2395e+09	1.1312e+09	1.125e+09	1.0357e+09	1.3503e+09	1.4059e+09	1.4651e+09	1.3794e+09	1.8537e+09	1.4889e+09	1.328e+09	1.5067e+09	1.3666e+09
ZMO0124	1.8556e+08	1.8711e+08	1.7923e+08	1.1586e+08	1.3271e+08	1.2985e+08	1.355e+08	1.3469e+08	1.2396e+08	1.6261e+08	1.4992e+08	1.7263e+08	1.8964e+08	2.1214e+08	1.5872e+08	1.3329e+08	1.3407e+08	1.458e+08	1.3997e+08	1.4113e+08	1.4249e+08	1.7008e+08	1.4296e+08	1.7824e+08
ZMO0125	8.944e+08	9.819e+08	9.1319e+08	1.0575e+09	1.1366e+09	1.081e+09	1.0043e+09	9.9263e+08	1.0567e+09	8.51429e+08	7.5104e+08	9.4496e+08	9.7746e+08	9.5137e+08	9.619e+08	1.096e+09	1.1951e+09	1.2008e+09	1.0151e+09	1.125e+09	1.0762e+09	7.6488e+08	1.1189e+09	9.38841e+08
ZMO0127	1.3995e+08	1.8484e+08	1.5011e+08	1.2853e+08	1.3839e+08	1.4083e+08	1.3176e+08	1.4887e+08	1.3371e+08	1.2177e+08	1.5786e+08	9.9398e+07	1.3708e+08	1.4567e+08	1.4317e+08	1.3871e+08	1.1891e+08	1.3739e+08	1.6226e+08	1.2171e+08	1.5321e+08	1.7294e+08	1.2864e+08	1.8125e+08
ZMO0128	6.9355e+07	5.1535e+07	5.0304e+07	4.2191e+07	2.713e+07	2.6421e+07	3.5752e+07	3.2132e+07	2.9506e+07	3.1525e+07	2.9846e+07	4.5897e+07	2.5227e+07	1.9503e+07	1.8243e+07	2.85958e+07	1.5576e+07	1.8133e+07	1.12831e+07	5.56522e+06	2.7547e+07	1.8198e+07	2.0315e+07	2.75621e+07
ZMO0130	2.4675e+07	3.9851e+07	4.1203e+07	3.9868e+07	4.3602e+07	3.553e+07	3.2047e+07	3.6107e+07	3.5348e+07	2.4003e+07	1.6976e+07	1.2688e+07	2.8835e+07	3.4902e+07	3.1049e+07	2.9688e+07	2.4774e+07	3.2141e+07	2.2231e+07	2.0402e+07	2.0559e+07	1.6131e+07	1.6026e+07	1.0898e+07
ZMO0131	1.9331e+07	1.4253e+07	1.8798e+07	1.2626e+07	1.1175e+07	1.0843e+07	1.0656e+07	1.22704e+07	9.2074e+06	8.28531e+06	4.13813e+06	9.47934e+06	1.3551e+07	1.2012e+07	8.01526e+06	1.0213e+07	9.1927e+06	7.1541e+06	8.11771e+06	8.5448e+06	6.9465e+06	2.86708e+07	5.44368e+06	1.56634e+07
ZMO0132	1.0408e+07	1.14919e+07	7.5525e+06	3.4624e+06	3.8474e+06	3.9366e+06	5.11877e+06	4.14488e+07	1.46417e+07	1.17603e+07	1.89e+07	2.07841e+06	8.48225e+06	4.3357e+06	1.29666e+07	9.42365e+06	1.23435e+07	5.3196e+06	1.70621e+07	1.56511e+07	2.8513e+06	1.29875e+07	1.07044e+07	2.56556e+06
ZMO0133	4.75e+07	5.8628e+07	7.3011e+07	3.0429e+07	2.9185e+07	2.9959e+07	2.8466e+07	2.0984e+07	2.8167e+07	9.9091e+06	1.3309e+07	7.8238e+06	6.1725e+07	4.4483e+07	5.3721e+07	2.7562e+07	2.159e+07	2.3864e+07	1.8858e+07	1.3168e+07	2.0615e+07	1.3343e+07	5.17348e+07	2.59666e+07
ZMO0137	5.9987e+08	6.7965e+08	6.6365e+08	6.5675e+08	6.6957e+08	6.9245e+08	5.071e+08	4.6461e+08	5.3731e+08	1.4769e+08	1.1673e+08	1.5234e+08	6.687e+08	8.0717e+08	7.0595e+08	6.1491e+08	6.7916e+08	6.7231e+08	3.9189e+08	5.3811e+08	3.8669e+08	1.4526e+08	2.1793e+08	1.1048e+08
ZMO0139	3.0871e+08	3.1989e+08	2.6841e+08	3.0441e+08	3.0624e+08	3.2263e+08	3.1441e+08	2.9679e+08	3.3469e+08	3.8089e+08	4.0624e+08	3.3701e+08	2.8474e+08	2.8374e+08	3.0447e+08	3.2082e+08	3.1935e+08	2.8228e+08	3.4453e+08	3.1977e+08	3.9938e+08	4.5771e+08	4.4489e+08	4.4398e+08
ZMO0140	4.2115e+08	3.728e+08	3.7053e+08	3.7336e+08	3.7581e+08	3.2087e+08	3.5987e+08	3.4791e+08	3.4896e+08	3.5344e+08	3.4984e+08	3.2913e+08	3.771e+08	4.043e+08	3.2704e+08	3.806e+08	4.5847e+08	3.9042e+08	3.8226e+08	4.2635e+08	3.8923e+08	4.585e+08	3.7667e+08	4.6133e+08
ZMO0142	1.6356e+09	1.4342e+09	1.5976e+09	1.8303e+09	1.9377e+09	2.0813e+09	1.737e+09	1.7591e+09	1.9387e+09	1.7048e+09	1.5677e+09	1.6028e+09	1.5627e+09	2.028e+09	1.7498e+09	2.0343e+09	2.3084e+09	2.1756e+09	1.907e+09	2.1064e+09	1.9359e+09	1.4822e+09	1.9368e+09	1.736e+09
ZMO0143	3.1773e+08	3.0742e+08	2.768e+08	2.5086e+08	2.7926e+08	2.6624e+08	2.7277e+08	3.1441e+08	2.5103e+08	3.4406e+08	3.4132e+08	3.0275e+08	2.6381e+08	3.1082e+08	2.5871e+08	2.6793e+08	2.634e+08	2.4143e+08	2.8234e+08	2.9443e+08	2.5147e+08	3.3795e+08	3.0062e+08	3.0463e+08
ZMO0144	2.6937e+09	2.6958e+09	3.1157e+09	3.3828e+09	3.4017e+09	3.3454e+09	3.4218e+09	3.4723e+09	3.4398e+09	3.9043e+09	4.0797e+09	3.8464e+09	2.7165e+09	3.218e+09	2.9918e+09	3.4421e+09	3.6113e+09	3.6715e+09	3.8761e+09	3.8945e+09	4.0315e+09	4.35939e+09	4.6098e+09	4.4627e+09
ZMO0145	1.1783e+08	1.4405e+08	1.3802e+08	8.8128e+07	6.8323e+07	6.5833e+07	5.6585e+07	5.4159e+07	6.5313e+07	1.4047e+07	6.8094e+06	2.4711e+07	9.0721e+07	8.768e+07	7.1326e+07	4.8422e+07	4.8193e+07	5.2262e+07	2.2e+07	4.0159e+07	2.9945e+07	6.7972e+06	1.404e+07	3.3133e+06
ZMO0148	8.7423e+08	8.5408e+08	9.1243e+08	8.4154e+08	8.017e+08	8.4765e+08	7.0874e+08	6.6775e+08	7.3633e+08	2.974e+08	2.5376e+08	2.817e+08	7.4277e+08	9.0544e+08	8.9946e+08	7.7695e+08	8.5542e+08	7.5861e+08	6.4056e+08	7.809e+08	6.246e+08	2.9143e+08	3.2991e+08	1.9925e+08
ZMO0149	2.2664e+08	2.2163e+08	2.9759e+08	2.5081e+08	2.2554e+08	2.4272e+08	2.3368e+08	2.9321e+08	2.5193e+08	3.4907e+08	3.4182e+08	3.4381e+08	3.1059e+08	2.05e+08	3.6251e+08	3.0252e+08	2.9563e+08	3.5969e+08	3.2313e+08	3.0217e+08	3.0733e+08	3.8302e+08	3.6665e+08	4.7365e+08
ZMO0150	1.5603e+08	1.6239e+08	1.3468e+08	1.9832e+08	1.7803e+08	1.8803e+08	2.4952e+08	3.1442e+08	2.3816e+08	3.3838e+08	3.45e+08	2.5949e+08	1.8063e+08	1.8422e+08	1.66e+08	2.6853e+08	2.4934e+08	2.5581e+08	3.8916e+08	3.268e+08	3.9752e+08	4.0599e+08	3.8465e+08	4.6074e+08
ZMO0152	4.7778e+10	4.9215e+10	5.1933e+10	5.5813e+10	5.3867e+10	5.56019e+10	5.87569e+10	5.28479e+10	5.8403e+10	5.13579e+10	5.6966e+10	6.04821e+10	5.1042e+10	5.6156e+10	5.9609e+10	6.4069e+10	6.12671e+10	6.45179e+10	6.09929e+10	6.234e+10	6.96381e+10	5.1701e+10	6.7842e+10	6.0025e+10
ZMO0153	5.5515e+09	5.2636e+09	5.8229e+09	4.3407e+09	4.4738e+09	4.8566e+09	3.7478e+09	4.1354e+09	4.4458e+09	4.2858e+09	4.2198e+09	4.2821e+09	5.1487e+09	6.8607e+09	6.47161e+09	5.0411e+09	4.54781e+09	4.8918e+09	4.531e+09	4.4469e+09	4.5746e+09	4.6175e+09	5.0073e+09	4.86101e+09
ZMO0154	4.8926e+07	5.6762e+07	4.7418e+07	4.2398e+07	3.0959e+07	3.6639e+07	2.7901e+07	2.7388e+07	2.8327e+07	4.1767e+07	3.8657e+07	3.7604e+07	5.1035e+07	9.85619e+07	4.2707e+07	3.8167e+07	3.4798e+07	2.9779e+07	3.5145e+07	2.5044e+07	3.0594e+07	3.9809e+07	2.9721e+07	4.0065e+07
ZMO0155	9.9606e+07	1.095e+08	8.1414e+07	5.7887e+07	5.2038e+07	5.491e+07	4.9153e+07	5.504e+07	4.5399e+07	6.6641e+07	4.8722e+07	5.1315e+07	1.1421e+08	1.0103e+08	8.32e+07	5.4975e+07	5.6199e+07	5.972e+07	6.4316e+07	4.7791e+07	4.8793e+07	6.2435e+07	4.9524e+07	6.0473e+07
ZMO0156	6.943e+07	8.6735e+07	5.6987e+07	4.0486e+07	5.3476e+07	3.8678e+07	4.9354e+07	5.4341e+07	4.2431e+07	3.3131e+07	4.2536e+07	4.577e+07	1.3588e+08	1.583e+08	1.125e+08	7.7337e+07	7.4294e+07	7.9975e+07	7.3939e+07	7.8343e+07	7.8508e+07	6.0224e+07	5.972e+07	6.6366e+07
ZMO0157	1.7511e+09	1.7901e+09	1.6865e+09	2.1246e+09	2.2729e+09	2.2487e+09	2.2276e+09	2.1421e+09	2.4081e+09	2.0769e+09	2.1314e+09	2.2889e+09	1.705e+09	1.6693e+09	1.6801e+09	2.2596e+09	2.3597e+09	2.4479e+09	2.2956e+09	2.504e+09	2.6755e+09	2.0448e+09	2.4611e+09	2.1341e+09
ZMO0158	5.9281e+08	6.6197e+08	6.4283e+08	6.6986e+08	7.1294e+08	6.8485e+08	7.2167e+08	7.499e+08	7.2251e+08	8.8494e+08	9.00359e+08	8.2533e+08	6.7227e+08	6.5467e+08	6.532e+08	7.3114e+08	6.8796e+08	7.5737e+08	8.49011e+08	7.386e+08	8.23199e+08	9.55459e+08	8.7082e+08	9.7579e+08
ZMO0160	8.7592e+07	6.4078e+07	7.2068e+07	1.1242e+08	8.2913e+07	9.11999e+07	1.0513e+08	9.5049e+07	9.1111e+07	1.0462e+08	1.0884e+08	9.8193e+07	7.2053e+07	5.0201e+07	7.2032e+07	9.4662e+07	9.2136e+07	9.0033e+07	9.7108e+07	8.9863e+07	7.8395e+07	1.2935e+08	9.7837e+07	1.2395e+08
ZMO0161	2.8755e+08	3.5645e+08	2.6273e+08	2.212e+08	2.0946e+08	2.2593e+08	2.0694e+08	2.8104e+08	2.4669e+08	3.2249e+08	3.3494e+08	2.8532e+08	1.8739e+08	3.1371e+08	2.5271e+08	2.2346e+08	1.6184e+08	2.1732e+08	2.3819e+08	1.6374e+08	2.3797e+08	3.1508e+08	2.6271e+08	2.4257e+08
ZMO0162	1.7798e+08	1.6454e+08	1.5597e+08	1.7903e+08	2.0041e+08	1.5929e+08	1.9003e+08	2.3219e+08	2.1662e+08	2.2503e+08	2.4917e+08	2.3288e+08	1.2657e+08	1.6702e+08	1.4461e+08	1.5585e+08	1.4518e+08	1.4724e+08	1.6516e+08	1.7419e+08	1.7514e+08	1.8697e+08	1.9057e+08	1.8024e+08
ZMO0164	1.4541e+08	1.1922e+08	1.063e+08	1.1751e+08	1.0651e+08	1.1177e+08	1.2344e+08	1.3949e+08	1.0184e+08	1.2713e+08	1.2789e+08	1.2984e+08	9.1e+07	1.3514e+08	8.9443e+07	9.38319e+07	9.2019e+07	9.5656e+07	1.1827e+08	1.0084e+08	1.0397e+08	1.1593e+08	9.8098e+07	1.1822e+08
ZMO0165	2.9694e+09	2.9035e+09	3.378e+09	3.5088e+09	3.2341e+09	3.7196e+09	3.1221e+09	3.4627e+09	3.4157e+09	2.5876e+09	2.276e+09	2.6375e+09	2.8973e+09	3.394e+09	3.3543e+09	3.2313e+09	3.5121e+09	3.1914e+09	2.8176e+09	3.3968e+09	2.7616e+09	1.9923e+09	2.3939e+09	1.7908e+09
ZMO0166	5.2102e+09	4.5954e+09	4.8988e+09	7.8848e+09	7.62e+09	7.01599e+09	8.78509e+09	9.2322e+09	7.5214e+09	8.36759e+09	8.68841e+09	1.0055e+10	4.3801e+09	2.874e+09	4.1695e+09	6.1869e+09	6.09409e+09	6.07159e+09	6.5208e+09	7.63241e+09	7.3295e+09	6.31659e+09	6.89279e+09	6.54479e+09
ZMO0169	2.8792e+09	2.466e+09	2.714e+09	2.479e+09	2.6374e+09	2.5262e+09	2.4542e+09	2.556e+09	2.4753e+09	2.5692e+09	2.8849e+09	2.4734e+09	2.9612e+09	4.061e+09	3.7128e+09	3.0542e+09	3.0275e+09	3.4435e+09	2.9434e+09	2.7588e+09	3.5115e+09	3.7557e+09	3.1792e+09	4.0549e+09
ZMO0172	6.01429e+09	6.9198e+09	8.44499e+09	9.2836e+09	1.0181e+10	1.0603e+10	7.82819e+09	7.4856e+09	9.15739e+09	6.5727e+09	6.6277e+09	7.482e+09	3.1763e+09	3.1782e+09	4.2171e+09	8.84761e+09	9.01471e+09	8.0294e+09	7.9761e+09	6.8713e+09	7.6961e+09	7.37681e+09	7.97719e+09	7.10709e+09
ZMO0173	1.8671e+08	2.0903e+08	1.7781e+08	2.1159e+08	2.0744e+08	2.1197e+08	2.1318e+08	2.2541e+08	2.0757e+08	2.1128e+08	2.117e+08	1.8013e+08	1.8131e+08	2.0893e+08	2.0228e+08	2.4418e+08	2.0248e+08	2.2168e+08	2.3883e+08	2.2997e+08	2.4281e+08	2.4123e+08	2.1549e+08	2.5733e+08
ZMO0174	1.5559e+08	1.6155e+08	1.8723e+08	1.6596e+08	1.6017e+08	1.9874e+08	1.7074e+08	1.5932e+08	1.3893e+08	1.2875e+08	1.6167e+08	1.395e+08	1.6113e+08	1.8038e+08	1.5555e+08	1.3132e+08	1.8736e+08	1.7897e+08	1.6801e+08	1.4106e+08	1.1201e+08	1.4677e+08	1.369e+08	1.7077e+08
ZMO0175	8.041e+07	7.4522e+07	5.7809e+07	4.9543e+07	5.2536e+07	4.3177e+07	5.4175e+07	5.6892e+07	4.271e+07	4.2464e+07	4.653e+07	4.5822e+07	5.7676e+07	8.8476e+07	5.2633e+07	5.9484e+07	5.403e+07	4.3732e+07	5.5412e+07	6.0072e+07	5.5209e+07	6.0117e+07	4.8586e+07	6.4995e+07
ZMO0176	2.1545e+09	2.3342e+09	2.3636e+09	2.2033e+09	2.0003e+09	2.018e+09	2.0488e+09	1.7796e+09	2.0406e+09	2.2098e+09	1.9313e+09	2.1922e+09	2.6064e+09	2.476e+09	2.2532e+09	1.988e+09	2.0155e+09	2.0426e+09	2.1319e+09	1.9047e+09	2.1805e+09	1.9371e+09	2.0694e+09	2.0938e+09
ZMO0177	5.7744e+10	5.42881e+10	6.2421e+10	6.6796e+10	6.39431e+10	6.8303e+10	6.80161e+10	6.82059e+10	7.3595e+10	7.11919e+10	7.97769e+10	7.3497e+10	6.63769e+10	7.9253e+10	7.1163e+10	8.21361e+10	8.08741e+10	8.43199e+10	8.2645e+10	7.92291e+10	8.74299e+10	9.0034e+10	9.3602e+10	1.01e+11
ZMO0178	4.1186e+10	4.4009e+10	4.53479e+10	4.8171e+10	4.7714e+10	4.9206e+10	4.7809e+10	4.59481e+10	5.057e+10	4.3245e+10	4.6774e+10	4.7231e+10	4.5429e+10	5.063e+10	5.4124e+10	5.6642e+10	5.643e+10	5.79259e+10	5.28999e+10	5.34e+10	5.765e+10	4.3675e+10	5.8002e+10	4.94641e+10
ZMO0179	1.2436e+09	1.0824e+09	1.2955e+09	1.4642e+09	1.3975e+09	1.3631e+09	1.7537e+09	1.8887e+09	1.7852e+09	2.0367e+09	2.0859e+09	2.0422e+09	1.1293e+09	1.2501e+09	1.2444e+09	1.4152e+09	1.5777e+09	1.6184e+09	1.9308e+09	1.9601e+09	2.322e+09	1.8222e+09	1.9423e+09	2.1159e+09
ZMO0180	1.8209e+09	1.7938e+09	1.6886e+09	1.2978e+09	1.332e+09	1.3386e+09	1.1005e+09	1.0223e+09	1.2159e+09	9.5683e+08	1.0474e+09	1.0335e+09	1.5722e+09	1.709e+09	1.8396e+09	1.2421e+09	1.2466e+09	1.258e+09	9.9043e+08	1.0142e+09	9.9849e+08	1.2063e+09	1.1985e+09	1.2833e+09
ZMO0182	5.2123e+09	4.8842e+09	4.627e+09	4.0561e+09	4.2597e+09	3.7689e+09	3.7929e+09	3.6367e+09	3.6839e+09	3.9329e+09	3.9463e+09	4.1949e+09	4.7668e+09	4.4519e+09	4.6019e+09	3.5556e+09	3.751e+09	3.8887e+09	3.4732e+09	3.8491e+09	4.1217e+09	3.5763e+09	3.7605e+09	3.8532e+09
ZMO0183	7.7753e+09	7.65069e+09	8.9115e+09	7.11e+09	8.1918e+09	7.32499e+09	7.22451e+09	8.3943e+09	6.96409e+09	8.5463e+09	9.39671e+09	8.97679e+09	8.181e+09	8.42799e+09	8.77091e+09	7.2399e+09	7.10311e+09	8.0232e+09	7.78211e+09	7.1801e+09	9.17639e+09	8.8925e+09	8.1337e+09	9.03241e+09
ZMO0186	1.3733e+09	1.4334e+09	1.5225e+09	1.2432e+09	1.2311e+09	1.4523e+09	1.2049e+09	1.1473e+09	1.3888e+09	1.1612e+09	1.2098e+09	1.1551e+09	1.3336e+09	1.5769e+09	1.5358e+09	1.2797e+09	1.2782e+09	1.2334e+09	1.1732e+09	1.0673e+09	1.1461e+09	1.0384e+09	1.2581e+09	1.0135e+09
ZMO0187	3.9724e+09	4.105e+09	4.297e+09	4.4724e+09	4.5264e+09	4.86189e+09	4.5206e+09	4.2348e+09	4.75861e+09	4.1386e+09	4.3145e+09	4.1556e+09	3.8849e+09	3.8743e+09	4.7408e+09	4.4286e+09	4.1398e+09	4.1248e+09	4.118e+09	4.0529e+09	4.2292e+09	3.4039e+09	4.1042e+09	3.5469e+09
ZMO0188	7.8914e+07	5.0393e+07	4.7009e+07	3.505e+07	3.1786e+07	2.1819e+07	2.83e+07	2.8315e+07	1.9276e+07	2.4397e+07	2.1103e+07	3.7271e+07	1.8113e+07	1.4803e+07	1.4757e+07	1.32949e+07	6.4383e+06	7.8231e+06	7.1889e+06	9.8553e+06	7.2053e+06	6.726e+06	8.2712e+06	6.4855e+06
ZMO0189	5.9002e+08	5.5861e+08	7.258e+08	7.1635e+08	7.6833e+08	8.2148e+08	7.1622e+08	7.3587e+08	7.7572e+08	8.4832e+08	9.3828e+08	8.7013e+08	5.7183e+08	7.3829e+08	6.8845e+08	7.3086e+08	7.5224e+08	7.9159e+08	7.9033e+08	7.0719e+08	8.0346e+08	9.2382e+08	8.5652e+08	9.31309e+08
ZMO0190	8.4251e+07	5.8936e+07	7.5838e+07	7.9266e+07	5.7199e+07	6.2274e+07	7.6991e+07	7.1357e+07	6.1061e+07	1.0314e+08	8.8208e+07	7.6295e+07	7.6025e+07	7.7452e+07	6.3552e+07	7.3008e+07	6.4758e+07	6.3559e+07	7.9846e+07	7.4414e+07	7.4607e+07	1.087e+08	1.0299e+08	1.0164e+08
ZMO0191	7.1671e+08	7.0617e+08	7.6202e+08	7.7716e+08	7.3923e+08	8.1772e+08	7.6577e+08	9.0006e+08	7.9945e+08	9.3229e+08	8.8511e+08	8.61921e+08	6.3069e+08	7.8113e+08	7.1859e+08	7.553e+08	6.8669e+08	7.1651e+08	7.4183e+08	8.3877e+08	6.9681e+08	7.7149e+08	8.3918e+08	7.5288e+08
ZMO0192	3.4436e+07	3.9215e+07	4.8813e+07	4.9095e+07	4.9693e+07	4.8928e+07	5.4128e+07	4.5736e+07	4.1074e+07	6.3565e+07	4.2016e+07	3.8045e+07	5.1822e+07	8.5386e+07	4.7867e+07	4.3983e+07	4.9693e+07	5.5023e+07	4.9745e+07	5.3686e+07	5.0482e+07	3.3835e+07	3.2641e+07	3.1137e+07
ZMO0193	6.5326e+09	7.03639e+09	6.5495e+09	7.3519e+09	7.9651e+09	7.3992e+09	7.432e+09	1.0082e+10	7.4837e+09	8.48189e+09	1.0427e+10	9.25909e+09	6.53831e+09	7.22479e+09	6.99419e+09	8.06229e+09	7.2452e+09	8.69961e+09	9.0118e+09	8.3324e+09	9.69291e+09	9.98409e+09	8.56039e+09	1.0413e+10
ZMO0195	4.2068e+07	3.6893e+07	1.7981e+07	1.997e+07	1.514e+07	2.4137e+07	9.6408e+06	7.0145e+06	1.0167e+07	1.8604e+07	1.71297e+07	2.52081e+07	1.429e+07	1.9282e+07	1.4554e+07	1.1209e+07	9.9714e+06	1.0005e+07	1.5824e+07	8.0597e+06	1.5388e+07	3.93677e+07	5.4388e+06	6.55601e+06
ZMO0197	1.295e+08	1.0525e+08	1.0533e+08	1.4645e+08	1.2436e+08	1.3437e+08	1.3814e+08	1.5166e+08	1.1231e+08	1.7179e+08	1.4965e+08	1.5515e+08	1.1783e+08	1.2462e+08	1.0107e+08	1.3769e+08	1.2034e+08	1.0841e+08	1.266e+08	1.3817e+08	1.2008e+08	1.1427e+08	1.3245e+08	1.163e+08
ZMO0198	1.0989e+09	1.1439e+09	1.2669e+09	1.1714e+09	1.0627e+09	1.2788e+09	1.1493e+09	1.2006e+09	1.1947e+09	1.1392e+09	1.1079e+09	1.1306e+09	1.1343e+09	1.1288e+09	1.3361e+09	1.2257e+09	1.2116e+09	1.2433e+09	1.2694e+09	1.1434e+09	1.1947e+09	1.0667e+09	1.2451e+09	1.1856e+09
ZMO0199	3.6794e+07	3.0166e+07	3.0229e+07	2.5775e+07	2.8046e+07	2.8782e+07	2.7638e+07	1.9767e+07	2.7844e+07	3.019e+07	3.3253e+07	2.4504e+07	2.6979e+07	1.9481e+07	3.0378e+07	3.0295e+07	2.4257e+07	2.2062e+07	2.2826e+07	2.3203e+07	2.6516e+07	3.5568e+07	3.0512e+07	3.1586e+07
ZMO0200	6.0006e+08	6.8179e+08	8.2379e+08	8.2006e+08	8.6447e+08	7.8443e+08	7.8495e+08	7.6216e+08	7.9501e+08	6.6561e+08	6.7853e+08	7.858e+08	6.8128e+08	7.4713e+08	6.5659e+08	7.1813e+08	7.1344e+08	7.8888e+08	6.8544e+08	7.1982e+08	6.981e+08	5.9472e+08	7.4198e+08	6.0032e+08
ZMO0201	3.3976e+08	3.5545e+08	3.0405e+08	3.089e+08	2.7578e+08	2.8859e+08	2.8705e+08	2.551e+08	3.0464e+08	2.879e+08	2.4395e+08	2.5415e+08	3.2135e+08	3.6805e+08	3.2129e+08	2.989e+08	2.8876e+08	2.5989e+08	2.8186e+08	2.5184e+08	3.4538e+08	2.7431e+08	3.2333e+08	2.9911e+08
ZMO0202	3.0337e+08	3.3541e+08	2.8573e+08	1.6611e+08	2.0266e+08	1.752e+08	1.6751e+08	2.109e+08	1.6113e+08	1.9953e+08	2.1352e+08	2.3119e+08	5.0068e+08	5.1635e+08	4.807e+08	2.68e+08	2.4009e+08	3.1254e+08	3.1731e+08	2.8212e+08	3.3931e+08	3.7007e+08	2.7442e+08	3.7512e+08
ZMO0203	9.73488e+06	5.723e+06	3.1052e+06	2.29184e+07	8.0538e+06	7.2817e+06	1.71297e+07	7.4858e+06	7.9128e+06	8.6736e+06	9.55201e+06	5.7306e+06	1.84182e+07	6.75373e+06	1.02804e+07	4.6223e+06	5.2958e+06	5.4784e+06	8.3485e+06	8.6948e+06	5.8132e+06	7.9766e+06	5.1197e+06	9.2054e+06
ZMO0205	2.5897e+08	2.9345e+08	2.0518e+08	2.9076e+08	2.8256e+08	2.2546e+08	2.7076e+08	2.9678e+08	3.016e+08	2.7803e+08	3.2783e+08	3.0044e+08	2.7052e+08	2.501e+08	2.8613e+08	2.761e+08	3.0066e+08	3.3002e+08	2.955e+08	3.2208e+08	3.9596e+08	3.798e+08	3.3996e+08	3.7451e+08
ZMO0206	8.9563e+08	1.0072e+09	1.0427e+09	9.7389e+08	1.041e+09	1.0644e+09	9.60539e+08	8.6049e+08	1.0233e+09	7.891e+08	7.8571e+08	7.679e+08	1.0827e+09	1.2464e+09	1.2105e+09	1.1257e+09	1.1289e+09	1.1596e+09	9.70041e+08	1.016e+09	1.0389e+09	7.8198e+08	1.0353e+09	8.5146e+08
ZMO0207	1.0055e+09	1.0125e+09	1.1906e+09	1.0946e+09	1.0187e+09	1.048e+09	1.0089e+09	9.5576e+08	1.0477e+09	1.2253e+09	1.135e+09	1.1741e+09	1.03e+09	1.3312e+09	1.1878e+09	1.0998e+09	1.2024e+09	1.1655e+09	1.1493e+09	1.1792e+09	1.2673e+09	1.2894e+09	1.3804e+09	1.3706e+09
ZMO0208	1.185e+08	1.1417e+08	1.1777e+08	1.2692e+08	9.7599e+07	1.2107e+08	1.0738e+08	9.3972e+07	1.162e+08	9.0396e+07	9.043e+07	7.6368e+07	1.0325e+08	1.3945e+08	1.345e+08	1.3976e+08	1.3368e+08	1.3406e+08	1.2648e+08	9.6041e+07	1.1365e+08	1.4171e+08	1.2607e+08	1.1922e+08
ZMO0209	2.4187e+09	2.7538e+09	2.3946e+09	2.0607e+09	2.2319e+09	2.1277e+09	2.0196e+09	2.1807e+09	2.1558e+09	2.3366e+09	2.531e+09	2.1057e+09	2.1863e+09	2.9501e+09	2.7249e+09	2.4051e+09	2.2638e+09	2.2194e+09	2.4048e+09	2.2073e+09	2.4981e+09	2.5695e+09	2.5794e+09	2.6054e+09
ZMO0211	2.5576e+09	2.7702e+09	2.8519e+09	2.5118e+09	2.3477e+09	2.0873e+09	2.2659e+09	2.109e+09	2.1375e+09	2.3116e+09	2.2062e+09	2.0479e+09	2.8157e+09	3.2501e+09	2.7785e+09	2.4458e+09	2.1787e+09	2.1983e+09	2.3663e+09	2.1483e+09	2.1653e+09	2.3116e+09	2.8406e+09	2.5025e+09
ZMO0215	7.155e+08	8.8303e+08	8.4711e+08	9.4947e+08	1.0795e+09	9.2051e+08	1.0859e+09	1.0918e+09	1.0224e+09	1.2822e+09	1.4823e+09	1.4504e+09	8.4049e+08	8.6842e+08	7.835e+08	1.0129e+09	1.023e+09	1.1808e+09	1.1203e+09	1.2257e+09	1.5207e+09	1.3983e+09	1.3646e+09	1.5763e+09
ZMO0219	2.2916e+08	2.3091e+08	1.9798e+08	1.9654e+08	1.6501e+08	1.6419e+08	1.9919e+08	1.8062e+08	1.7334e+08	2.122e+08	1.8673e+08	2.3476e+08	2.3427e+08	2.5442e+08	2.0338e+08	1.7233e+08	1.7361e+08	1.7943e+08	1.9163e+08	2.1738e+08	2.1512e+08	2.2694e+08	2.1676e+08	2.1775e+08
ZMO0220	1.2856e+09	1.0169e+09	9.80029e+08	8.02e+08	8.4202e+08	7.5025e+08	6.6409e+08	6.0374e+08	6.5881e+08	5.7993e+08	5.108e+08	5.8019e+08	9.7064e+08	9.572e+08	1.0651e+09	7.1734e+08	7.9486e+08	7.219e+08	5.8978e+08	6.5768e+08	6.2995e+08	4.9231e+08	6.2914e+08	4.9906e+08
ZMO0221	2.5544e+09	2.5973e+09	2.766e+09	1.6561e+09	1.6642e+09	1.8253e+09	9.953e+08	1.0674e+09	1.1687e+09	8.7948e+08	1.0642e+09	1.0351e+09	2.3024e+09	3.3113e+09	2.3279e+09	1.5074e+09	1.5768e+09	1.5323e+09	1.1552e+09	9.83219e+08	1.2061e+09	1.2234e+09	1.1765e+09	1.2816e+09
ZMO0222	3.485e+07	2.6883e+07	2.9801e+07	3.6839e+07	3.7932e+07	3.8115e+07	3.0223e+07	2.2967e+07	3.1399e+07	2.8939e+07	2.0698e+07	2.5526e+07	2.885e+07	3.1219e+07	3.5098e+07	3.3669e+07	3.0739e+07	3.3576e+07	3.1231e+07	2.7494e+07	2.5789e+07	1.9383e+07	2.9261e+07	3.0087e+07
ZMO0223	6.3237e+06	8.7982e+06	7.9756e+06	5.0202e+06	5.7592e+06	8.1474e+06	6.8029e+06	9.0109e+06	8.5785e+06	1.006e+07	1.1226e+07	7.5206e+06	5.60108e+06	4.2561e+06	8.1734e+06	2.27032e+07	6.3689e+06	9.4156e+06	8.1871e+06	3.3299e+06	5.674e+06	9.55929e+06	6.6001e+06	8.5563e+06
ZMO0224	1.0839e+08	1.1624e+08	1.1276e+08	9.8403e+07	8.16031e+07	1.0534e+08	1.0486e+08	1.2764e+08	9.52161e+07	1.446e+08	1.3375e+08	1.1082e+08	1.246e+08	8.86019e+07	1.1583e+08	1.1848e+08	1.1807e+08	1.1453e+08	1.3799e+08	1.1622e+08	1.0912e+08	1.6187e+08	1.4007e+08	1.7081e+08
ZMO0225	1.1001e+08	1.3265e+08	1.6824e+08	1.347e+08	1.0166e+08	1.3067e+08	1.2763e+08	1.1591e+08	1.0455e+08	1.8544e+08	1.8404e+08	1.5576e+08	1.6491e+08	1.6316e+08	1.686e+08	1.4127e+08	1.3877e+08	1.4371e+08	1.6933e+08	1.1916e+08	1.6866e+08	2.2001e+08	1.634e+08	1.975e+08
ZMO0226	1.5495e+08	1.2811e+08	1.3766e+08	1.3979e+08	1.5473e+08	1.4156e+08	1.4352e+08	1.3752e+08	1.3527e+08	1.4387e+08	1.1201e+08	1.4296e+08	1.2344e+08	1.8214e+08	1.3988e+08	1.3456e+08	1.3654e+08	1.4159e+08	1.4224e+08	1.3466e+08	1.5488e+08	1.2357e+08	1.3295e+08	1.0838e+08
ZMO0227	5.8494e+08	5.7668e+08	5.6751e+08	4.6093e+08	4.6057e+08	4.48e+08	4.4435e+08	4.3772e+08	4.3571e+08	4.5598e+08	4.9527e+08	4.5752e+08	5.2591e+08	5.2139e+08	5.0438e+08	4.2098e+08	4.0316e+08	4.1178e+08	4.2256e+08	4.1471e+08	4.0696e+08	5.1667e+08	4.1478e+08	4.6934e+08
ZMO0230	2.5493e+07	2.4647e+07	2.1348e+07	2.2978e+07	2.758e+07	2.1195e+07	1.7147e+07	2.7547e+07	1.5237e+07	3.6397e+07	2.0706e+07	2.5746e+07	2.7871e+07	2.6044e+07	2.2364e+07	1.4101e+07	1.7959e+07	2.3952e+07	2.545e+07	2.1331e+07	1.2899e+07	2.2774e+07	9.16899e+06	3.6684e+07
ZMO0231	1.9132e+08	1.4627e+08	2.2814e+08	2.0185e+08	1.6548e+08	2.0101e+08	2.3101e+08	3.0811e+08	1.991e+08	2.5514e+08	4.084e+08	3.3569e+08	2.1773e+08	3.2243e+08	2.1264e+08	2.0234e+08	2.6066e+08	2.1498e+08	2.7819e+08	2.9e+08	2.5432e+08	3.6522e+08	2.4673e+08	4.4199e+08
ZMO0232	8.1995e+08	8.5859e+08	7.5872e+08	7.3259e+08	7.2846e+08	8.1029e+08	7.2222e+08	6.3321e+08	7.7916e+08	7.7121e+08	8.1217e+08	7.5815e+08	7.7436e+08	8.0801e+08	7.4652e+08	7.0388e+08	6.9644e+08	6.644e+08	6.2072e+08	6.4099e+08	6.7102e+08	9.0356e+08	8.235e+08	8.15261e+08
ZMO0233	1.2135e+08	1.2896e+08	1.0069e+08	1.0802e+08	1.2052e+08	1.0007e+08	1.1636e+08	9.3189e+07	9.4762e+07	1.0068e+08	7.6345e+07	8.0244e+07	1.2446e+08	9.19329e+07	8.6463e+07	8.2483e+07	1.3334e+08	1.1531e+08	8.3614e+07	9.0295e+07	9.5938e+07	8.2902e+07	7.9588e+07	8.3789e+07
ZMO0234	5.65341e+09	6.13531e+09	6.1923e+09	6.6026e+09	7.4172e+09	7.24909e+09	6.4553e+09	7.8849e+09	6.8135e+09	5.79079e+09	5.53761e+09	6.2362e+09	5.3211e+09	5.55939e+09	5.8787e+09	5.8227e+09	6.16851e+09	6.45131e+09	5.8002e+09	6.79871e+09	6.1576e+09	5.1865e+09	6.0309e+09	5.16109e+09
ZMO0236	3.4271e+08	3.859e+08	4.5284e+08	3.6673e+08	3.6639e+08	4.5942e+08	3.5587e+08	3.7952e+08	4.4238e+08	4.3617e+08	4.666e+08	3.4433e+08	4.0555e+08	4.9655e+08	4.8753e+08	4.85e+08	3.9185e+08	4.0582e+08	4.3002e+08	3.8914e+08	3.5991e+08	5.5444e+08	4.6347e+08	5.4352e+08
ZMO0238	3.3401e+09	2.571e+09	3.6626e+09	5.9717e+09	5.9815e+09	5.9908e+09	6.6564e+09	8.87089e+09	7.31201e+09	6.61031e+09	8.33721e+09	7.2259e+09	3.4931e+09	4.1924e+09	3.1932e+09	6.57541e+09	6.99771e+09	5.9173e+09	7.40881e+09	8.2121e+09	6.02861e+09	7.2421e+09	6.65301e+09	8.51351e+09
ZMO0239	2.5245e+10	2.5337e+10	2.6805e+10	2.8742e+10	2.794e+10	3.0248e+10	3.0819e+10	3.5904e+10	3.2167e+10	3.4687e+10	3.8459e+10	3.5139e+10	2.5805e+10	2.7184e+10	3.0351e+10	3.18e+10	3.1372e+10	3.2683e+10	3.3554e+10	3.4828e+10	3.6224e+10	3.6677e+10	3.7874e+10	3.9672e+10
ZMO0240	6.2119e+09	5.8841e+09	5.2389e+09	7.2093e+09	7.7863e+09	7.02721e+09	8.7419e+09	9.74979e+09	8.45719e+09	9.55281e+09	9.6413e+09	9.8068e+09	5.8813e+09	7.24151e+09	6.6828e+09	8.31671e+09	8.02011e+09	8.02331e+09	8.7962e+09	1.0088e+10	1.0233e+10	1.0193e+10	9.39219e+09	9.82131e+09
ZMO0241	3.7044e+10	3.6128e+10	3.9737e+10	4.3236e+10	3.9837e+10	4.327e+10	4.43539e+10	5.26419e+10	4.7868e+10	5.20099e+10	5.28939e+10	4.8573e+10	3.7272e+10	4.3398e+10	4.3434e+10	4.5933e+10	4.6333e+10	4.8826e+10	5.07809e+10	5.1417e+10	5.1792e+10	5.6004e+10	5.5918e+10	5.72151e+10
ZMO0242	2.4284e+09	2.3909e+09	2.7662e+09	3.1007e+09	2.6274e+09	3.2629e+09	3.2538e+09	3.5723e+09	3.3583e+09	3.7761e+09	3.6669e+09	3.586e+09	2.6906e+09	2.1127e+09	2.7408e+09	3.1455e+09	3.662e+09	3.4806e+09	3.5007e+09	3.6961e+09	3.5431e+09	3.5538e+09	4.1142e+09	4.0043e+09
ZMO0243	9.98579e+07	7.8587e+07	9.8581e+07	7.721e+07	6.533e+07	8.5561e+07	8.0159e+07	7.6398e+07	7.746e+07	8.3012e+07	6.8921e+07	7.7285e+07	7.7771e+07	5.7467e+07	8.6452e+07	6.8013e+07	6.9286e+07	4.9332e+07	7.5173e+07	5.7692e+07	5.5011e+07	7.3672e+07	6.8469e+07	6.9138e+07
ZMO0244	6.3823e+09	6.17401e+09	6.6086e+09	5.4871e+09	6.5193e+09	6.02901e+09	5.2709e+09	5.9951e+09	5.72e+09	5.3834e+09	5.52271e+09	5.6641e+09	5.8826e+09	4.5467e+09	5.6817e+09	5.7331e+09	5.84671e+09	6.44601e+09	5.089e+09	6.29111e+09	4.9252e+09	4.5234e+09	4.9509e+09	5.4564e+09
ZMO0246	5.1001e+08	6.5979e+08	5.1468e+08	5.1251e+08	5.6654e+08	6.3545e+08	5.9426e+08	7.0031e+08	7.9897e+08	7.5841e+08	9.44111e+08	7.0458e+08	5.2529e+08	6.2912e+08	5.9108e+08	6.9624e+08	6.547e+08	7.0422e+08	8.2085e+08	7.4355e+08	9.4449e+08	8.3324e+08	8.32701e+08	9.8113e+08
ZMO0247	5.1427e+09	5.56191e+09	5.4299e+09	5.8743e+09	6.04291e+09	6.0313e+09	6.3946e+09	6.7548e+09	6.89991e+09	6.9805e+09	8.30961e+09	7.73889e+09	5.957e+09	7.69301e+09	6.3003e+09	7.46019e+09	7.00721e+09	8.0647e+09	8.2062e+09	7.31359e+09	9.58041e+09	8.4939e+09	8.0047e+09	9.26489e+09
ZMO0249	2.3505e+09	3.0962e+09	2.9853e+09	2.7081e+09	2.3753e+09	2.9384e+09	2.8329e+09	2.63e+09	2.4357e+09	2.911e+09	2.6487e+09	2.6041e+09	3.0316e+09	3.5196e+09	3.0411e+09	2.9997e+09	2.7619e+09	2.7457e+09	2.6573e+09	2.8753e+09	2.4902e+09	3.0288e+09	2.6945e+09	3.0391e+09
ZMO0250	1.3721e+07	9.229e+06	1.4805e+07	2.4781e+07	3.5794e+07	2.2313e+07	2.6308e+07	2.3914e+07	2.8293e+07	2.2858e+07	3.0784e+07	2.8548e+07	1.3599e+07	1.9694e+07	1.1416e+07	2.4208e+07	2.3913e+07	1.9848e+07	3.1686e+07	3.3496e+07	3.058e+07	3.446e+07	2.8551e+07	3.7757e+07
ZMO0251	2.861e+09	2.3385e+09	2.8545e+09	3.5204e+09	3.5841e+09	2.9409e+09	3.2879e+09	2.6356e+09	2.8314e+09	2.6979e+09	3.0633e+09	2.976e+09	2.7076e+09	2.6417e+09	2.7428e+09	3.4753e+09	3.6126e+09	3.2472e+09	3.3051e+09	2.8699e+09	3.2035e+09	2.8347e+09	3.2412e+09	2.9743e+09
ZMO0252	1.3606e+09	1.1969e+09	1.1122e+09	1.1518e+09	1.0278e+09	1.075e+09	9.49791e+08	9.6483e+08	8.2952e+08	8.0478e+08	6.0006e+08	6.3312e+08	3.4386e+08	3.3587e+08	2.686e+08	2.3124e+08	2.7094e+08	1.9902e+08	2.0534e+08	2.4615e+08	1.5147e+08	1.7555e+08	1.9861e+08	1.132e+08
ZMO0253	8.176e+07	7.7536e+07	8.8099e+07	4.6122e+07	2.8924e+07	3.1997e+07	3.7032e+07	3.9799e+07	2.5571e+07	4.0036e+07	4.2207e+07	3.1691e+07	2.7579e+07	1.9224e+07	2.1182e+07	6.1081e+06	9.6769e+06	8.5728e+06	7.9111e+06	5.6295e+06	3.5064e+06	1.151e+07	9.6428e+06	4.784e+06
ZMO0254	2.2463e+08	2.1606e+08	2.1111e+08	1.8955e+08	2.1171e+08	1.8938e+08	1.9105e+08	2.3856e+08	1.701e+08	2.3249e+08	2.3412e+08	2.1609e+08	9.24459e+07	1.13e+08	7.5541e+07	9.5287e+07	9.0369e+07	8.5341e+07	1.0301e+08	1.0456e+08	8.9431e+07	1.2231e+08	1.0874e+08	1.0346e+08
ZMO0255	2.5058e+08	2.5615e+08	2.3734e+08	2.3475e+08	2.1902e+08	2.2913e+08	2.2313e+08	2.8519e+08	2.0036e+08	2.6412e+08	2.4314e+08	2.3098e+08	9.4336e+07	7.8913e+07	8.7744e+07	1.1765e+08	9.7812e+07	9.9542e+07	1.1875e+08	9.6247e+07	9.5247e+07	1.1934e+08	1.0747e+08	8.89861e+07
ZMO0256	1.5409e+09	1.4738e+09	1.2691e+09	1.6715e+09	1.6914e+09	1.3728e+09	1.9093e+09	1.7676e+09	1.4971e+09	1.6426e+09	1.4928e+09	1.9103e+09	1.3976e+09	1.2215e+09	1.3197e+09	1.5158e+09	1.4892e+09	1.6537e+09	1.5448e+09	1.9069e+09	1.7937e+09	1.3834e+09	1.5901e+09	1.3376e+09
ZMO0257	1.114e+09	1.0906e+09	1.1742e+09	1.8162e+09	1.476e+09	1.594e+09	1.7968e+09	1.3827e+09	1.6483e+09	1.5885e+09	1.5023e+09	1.5883e+09	1.1285e+09	8.8508e+08	1.4269e+09	1.653e+09	1.4839e+09	1.5395e+09	1.5555e+09	1.4811e+09	1.6305e+09	1.3716e+09	1.626e+09	1.6794e+09
ZMO0258	4.8257e+07	4.6643e+07	4.7815e+07	7.7109e+07	6.6786e+07	6.9919e+07	6.5808e+07	7.7131e+07	7.1216e+07	9.208e+07	7.9558e+07	7.4455e+07	6.674e+07	5.6892e+07	5.1222e+07	6.5723e+07	6.6949e+07	6.7136e+07	6.6183e+07	6.0294e+07	7.2135e+07	8.8642e+07	7.4072e+07	7.5401e+07
ZMO0260	7.101e+06	1.11902e+07	1.33546e+07	2.31828e+07	1.42456e+07	5.18833e+06	9.14828e+06	8.8515e+06	6.98999e+06	1.18468e+07	1.1869e+07	1.00724e+07	1.21644e+07	1.0086e+07	1.4048e+07	1.18479e+07	6.4417e+06	7.6911e+06	1.71313e+07	8.074e+06	8.60597e+06	4.91934e+06	5.83015e+06	1.76039e+07
ZMO0263	2.0201e+08	2.2232e+08	2.3349e+08	2.6357e+08	2.2132e+08	2.742e+08	2.1328e+08	2.0709e+08	2.0256e+08	1.2034e+08	1.1062e+08	1.0068e+08	2.168e+08	2.4208e+08	2.1364e+08	2.3124e+08	2.5232e+08	2.2823e+08	1.8453e+08	2.067e+08	1.7288e+08	1.2353e+08	1.2951e+08	1.0324e+08
ZMO0264	2.1409e+08	2.7028e+08	2.1908e+08	2.613e+08	2.5025e+08	2.6007e+08	2.1286e+08	1.8514e+08	1.8818e+08	1.1461e+08	1.1217e+08	9.5527e+07	1.9929e+08	2.0117e+08	2.1591e+08	1.9906e+08	2.2759e+08	2.0421e+08	1.5337e+08	1.9516e+08	1.7866e+08	9.6121e+07	1.0793e+08	9.4451e+07
ZMO0265	2.4357e+08	2.8263e+08	2.8605e+08	3.3261e+08	3.1403e+08	3.7011e+08	2.7878e+08	2.8398e+08	2.9848e+08	1.7913e+08	1.6359e+08	1.4609e+08	2.9108e+08	3.7752e+08	3.5721e+08	3.4282e+08	3.4134e+08	2.9172e+08	2.5239e+08	2.9229e+08	2.3741e+08	1.4221e+08	1.6906e+08	1.0922e+08
ZMO0266	8.2877e+07	9.3526e+07	9.1104e+07	8.84079e+07	7.7292e+07	8.51339e+07	6.0076e+07	4.4855e+07	6.2177e+07	2.9904e+07	3.6817e+07	2.7143e+07	8.8603e+07	9.8002e+07	9.18261e+07	6.3363e+07	8.2258e+07	5.7908e+07	4.2632e+07	6.1108e+07	2.8803e+07	3.9697e+07	1.9314e+07	2.0288e+07
ZMO0267	9.4126e+07	1.1051e+08	9.5123e+07	1.1158e+08	9.76281e+07	7.9831e+07	7.7405e+07	5.9447e+07	7.561e+07	3.7345e+07	2.1341e+07	3.0473e+07	7.9752e+07	6.0408e+07	5.8846e+07	8.66521e+07	1.0093e+08	8.8806e+07	6.8608e+07	8.0169e+07	6.5752e+07	1.9311e+07	3.0809e+07	2.5174e+07
ZMO0268	3.8693e+07	3.616e+07	3.8003e+07	4.1452e+07	4.013e+07	3.517e+07	3.5297e+07	3.002e+07	4.0099e+07	3.084e+07	2.7816e+07	2.0887e+07	3.0984e+07	3.7538e+07	4.0888e+07	3.6364e+07	4.4369e+07	3.7956e+07	3.7521e+07	3.5871e+07	3.5044e+07	2.2502e+07	2.4112e+07	1.9011e+07
ZMO0269	1.9356e+08	1.8767e+08	2.0753e+08	2.5376e+08	2.273e+08	2.3405e+08	1.9742e+08	1.8055e+08	2.1512e+08	1.2694e+08	8.5446e+07	9.3776e+07	2.3293e+08	2.3242e+08	1.9738e+08	2.3293e+08	2.6706e+08	2.2456e+08	1.8332e+08	2.28e+08	1.737e+08	8.2481e+07	1.1148e+08	8.9224e+07
ZMO0270	6.3203e+08	7.8798e+08	7.4158e+08	7.801e+08	7.6013e+08	7.1737e+08	6.1429e+08	5.9697e+08	6.3478e+08	3.2453e+08	3.1386e+08	3.1054e+08	7.518e+08	7.3953e+08	7.6534e+08	6.9746e+08	7.2745e+08	7.105e+08	5.6974e+08	6.4595e+08	5.6556e+08	3.0329e+08	3.5062e+08	2.3875e+08
ZMO0271	6.4578e+07	7.9233e+07	8.4692e+07	1.0923e+08	1.1498e+08	6.986e+07	1.0614e+08	1.2354e+08	7.131e+07	9.8477e+07	1.0335e+08	1.048e+08	9.3448e+07	7.5979e+07	8.3831e+07	1.0575e+08	1.0209e+08	1.0129e+08	1.1232e+08	1.1059e+08	1.3025e+08	1.3697e+08	1.0182e+08	1.1701e+08
ZMO0273	7.80391e+09	7.58461e+09	7.74831e+09	6.41301e+09	6.7485e+09	6.53361e+09	6.43181e+09	6.77271e+09	6.3706e+09	7.2336e+09	7.96491e+09	7.382e+09	7.32881e+09	7.1208e+09	7.70799e+09	6.2988e+09	6.4472e+09	6.9645e+09	6.99e+09	6.2473e+09	7.9826e+09	7.753e+09	7.64919e+09	8.2568e+09
ZMO0274	1.029e+08	1.1546e+08	9.92409e+07	1.1846e+08	1.2479e+08	9.18129e+07	1.2181e+08	1.1082e+08	8.86299e+07	1.196e+08	1.1963e+08	1.3868e+08	1.2239e+08	1.0817e+08	1.0294e+08	1.1867e+08	1.0298e+08	1.3257e+08	1.236e+08	1.1019e+08	1.6976e+08	1.3206e+08	1.1401e+08	1.51e+08
ZMO0275	3.4993e+08	3.8822e+08	4.4013e+08	3.7782e+08	3.8145e+08	3.9947e+08	4.1309e+08	4.2416e+08	4.1027e+08	4.5936e+08	4.5616e+08	4.7707e+08	3.3187e+08	3.111e+08	3.2807e+08	3.0272e+08	3.2158e+08	3.3892e+08	3.683e+08	3.4035e+08	3.9603e+08	4.2763e+08	3.8919e+08	4.3841e+08
ZMO0276	4.7836e+08	4.5969e+08	3.9985e+08	3.3786e+08	3.5465e+08	3.2478e+08	2.7873e+08	2.5679e+08	2.8266e+08	1.4901e+08	1.2121e+08	1.5484e+08	4.2756e+08	4.684e+08	4.0488e+08	2.8866e+08	3.3188e+08	2.9544e+08	2.4292e+08	3.1918e+08	2.2648e+08	9.7266e+07	1.3496e+08	8.3756e+07
ZMO0277	1.7112e+07	1.8811e+07	3.3912e+07	2.4905e+07	1.6858e+07	3.102e+07	2.1903e+07	2.4547e+07	2.8943e+07	3.3397e+07	3.5759e+07	2.082e+07	1.3898e+07	1.3424e+07	3.3652e+07	3.2981e+07	2.674e+07	1.9615e+07	2.6909e+07	3.2853e+07	1.4156e+07	3.4617e+07	2.4994e+07	2.9973e+07
ZMO0278	1.2741e+09	1.4596e+09	1.314e+09	1.2331e+09	1.7301e+09	1.3229e+09	1.4244e+09	1.1889e+09	1.3143e+09	1.051e+09	9.8593e+08	1.2836e+09	1.3667e+09	1.4445e+09	1.18e+09	1.2325e+09	1.5214e+09	1.4152e+09	1.1098e+09	1.4584e+09	1.3649e+09	9.59549e+08	1.1421e+09	1.049e+09
ZMO0279	1.428e+10	1.485e+10	1.4924e+10	1.4543e+10	1.3728e+10	1.3943e+10	1.4231e+10	1.3117e+10	1.4425e+10	1.5154e+10	1.6084e+10	1.5001e+10	1.331e+10	1.365e+10	1.5593e+10	1.5241e+10	1.4955e+10	1.4695e+10	1.52e+10	1.6168e+10	1.7161e+10	1.6185e+10	1.8078e+10	1.7843e+10
ZMO0281	4.7722e+07	4.196e+07	3.9274e+07	3.7713e+07	3.258e+07	3.9192e+07	3.5634e+07	3.5148e+07	3.1559e+07	3.9151e+07	2.7903e+07	3.448e+07	5.1473e+07	7.5408e+07	5.421e+07	4.9271e+07	4.8467e+07	4.7428e+07	4.7107e+07	4.4938e+07	4.7128e+07	4.4728e+07	4.8619e+07	4.1604e+07
ZMO0282	6.1478e+08	6.8356e+08	7.5315e+08	6.9084e+08	6.3679e+08	7.0384e+08	6.7721e+08	9.0567e+08	7.2374e+08	8.2446e+08	8.8955e+08	8.2395e+08	2.9299e+09	3.5136e+09	3.1225e+09	2.8469e+09	2.6458e+09	2.8869e+09	3.0873e+09	2.8863e+09	3.09e+09	3.4298e+09	3.2352e+09	3.3247e+09
ZMO0283	2.8607e+08	3.0035e+08	3.0119e+08	3.3366e+08	3.28e+08	3.038e+08	3.3994e+08	4.0004e+08	3.0304e+08	4.2963e+08	4.2909e+08	4.2401e+08	1.3691e+09	1.3355e+09	1.3276e+09	1.2593e+09	1.3547e+09	1.5137e+09	1.5044e+09	1.5161e+09	1.511e+09	1.8298e+09	1.5659e+09	1.9437e+09
ZMO0285	3.7936e+08	3.9906e+08	3.3922e+08	2.9675e+08	2.8989e+08	3.4667e+08	3.1244e+08	4.1491e+08	3.348e+08	3.7403e+08	3.5448e+08	3.8836e+08	1.452e+09	1.7918e+09	1.4097e+09	1.3135e+09	1.2547e+09	1.4032e+09	1.3387e+09	1.3714e+09	1.5169e+09	1.5689e+09	1.2979e+09	1.6844e+09
ZMO0286	2.4908e+09	2.2364e+09	2.4773e+09	2.8312e+09	2.5248e+09	3.1633e+09	2.9161e+09	3.3205e+09	3.2758e+09	2.6599e+09	2.6638e+09	2.8058e+09	1.7552e+09	2.6971e+09	2.462e+09	2.6498e+09	2.9285e+09	2.4289e+09	2.4443e+09	2.8448e+09	2.1331e+09	2.1666e+09	2.7116e+09	2.1536e+09
ZMO0287	1.0701e+09	1.0178e+09	1.0741e+09	9.83801e+08	9.055e+08	9.1769e+08	1.0086e+09	1.0926e+09	8.8244e+08	1.1528e+09	1.0497e+09	1.0449e+09	8.72231e+08	9.8849e+08	8.9207e+08	7.3458e+08	7.3874e+08	7.5842e+08	8.016e+08	7.8835e+08	8.3504e+08	8.2391e+08	8.5396e+08	9.0406e+08
ZMO0290	1.1236e+08	9.9422e+07	9.0984e+07	1.1715e+08	1.1596e+08	1.2412e+08	1.453e+08	1.7983e+08	1.4948e+08	2.1374e+08	2.5525e+08	1.8897e+08	9.33651e+07	1.0447e+08	9.8375e+07	1.3576e+08	1.2536e+08	1.4526e+08	2.0052e+08	1.7451e+08	1.9541e+08	2.7564e+08	2.1267e+08	2.4778e+08
ZMO0291	1.34112e+07	2.17905e+07	5.60157e+06	4.9228e+06	1.62725e+07	8.52665e+06	1.04468e+07	1.06426e+07	6.73711e+06	1.82145e+07	2.31185e+07	1.04713e+07	1.99113e+07	2.2559e+07	6.65932e+06	3.70874e+06	6.28206e+06	1.04925e+07	1.75876e+07	2.33069e+07	5.52105e+06	1.55281e+07	2.12511e+07	1.27168e+07
ZMO0293	5.6802e+08	5.9193e+08	5.6126e+08	5.8441e+08	6.445e+08	6.4891e+08	6.2511e+08	8.5529e+08	6.0146e+08	7.4486e+08	8.5476e+08	7.2977e+08	6.352e+08	6.8669e+08	5.85e+08	6.2435e+08	5.5821e+08	6.9969e+08	7.021e+08	5.2836e+08	7.3572e+08	8.0534e+08	6.1602e+08	7.4847e+08
ZMO0294	4.381e+09	3.5793e+09	4.73111e+09	3.2566e+09	3.9586e+09	4.1256e+09	3.1792e+09	3.9876e+09	3.8682e+09	4.0838e+09	4.1781e+09	4.3401e+09	3.6588e+09	5.0682e+09	4.6892e+09	3.6828e+09	3.6747e+09	4.0269e+09	3.771e+09	3.7273e+09	3.9814e+09	4.1147e+09	4.34691e+09	4.8139e+09
ZMO0296	1.4261e+07	1.5653e+07	1.14e+07	1.2693e+07	1.0151e+07	9.8093e+06	1.1232e+07	8.4955e+06	9.83181e+06	1.191e+07	1.1404e+07	1.1377e+07	2.3413e+07	1.4122e+07	1.2473e+07	1.4119e+07	1.0547e+07	1.231e+07	1.1469e+07	1.421e+07	1.08959e+07	1.4524e+07	1.2493e+07	1.0492e+07
ZMO0297	4.2235e+08	4.5224e+08	4.6775e+08	4.4552e+08	4.4528e+08	4.7661e+08	4.8177e+08	6.1245e+08	4.8751e+08	6.4995e+08	6.1925e+08	5.2107e+08	4.6236e+08	4.9844e+08	4.6527e+08	4.5169e+08	5.05e+08	4.9855e+08	5.4371e+08	5.1325e+08	4.9903e+08	6.5392e+08	6.2075e+08	6.4708e+08
ZMO0298	1.8072e+09	1.9143e+09	1.6994e+09	1.6654e+09	1.9589e+09	1.7647e+09	1.7675e+09	2.3389e+09	1.6832e+09	1.6864e+09	1.844e+09	1.8161e+09	2.0372e+09	2.8986e+09	2.1792e+09	2.194e+09	1.9621e+09	2.2348e+09	2.2213e+09	2.3038e+09	2.5083e+09	2.2108e+09	2.2526e+09	2.4079e+09
ZMO0299	1.5103e+09	1.6622e+09	1.4776e+09	1.1692e+09	1.1801e+09	1.2687e+09	1.1424e+09	1.009e+09	1.209e+09	9.4115e+08	9.2956e+08	1.1805e+09	1.5031e+09	1.8448e+09	1.5374e+09	1.2585e+09	1.2474e+09	1.2094e+09	1.0614e+09	1.2273e+09	1.268e+09	9.9709e+08	1.2236e+09	1.0589e+09
ZMO0300	3.4562e+08	4.1446e+08	3.4548e+08	3.1691e+08	3.0652e+08	3.1797e+08	3.2631e+08	3.1759e+08	3.2465e+08	3.8377e+08	4.171e+08	3.7028e+08	3.2717e+08	4.0674e+08	3.3619e+08	3.4992e+08	2.8674e+08	3.2146e+08	3.3606e+08	2.8384e+08	3.5666e+08	4.2876e+08	3.596e+08	4.134e+08
ZMO0301	7.9937e+06	8.7163e+06	1.0716e+07	1.1588e+07	1.0112e+07	8.9615e+06	8.393e+06	1.0157e+07	6.0144e+06	1.1729e+07	1.0487e+07	1.0243e+07	1.1443e+07	2.155e+07	6.178e+06	1.0103e+07	8.91901e+06	8.12e+06	7.7116e+06	6.4497e+06	8.1795e+06	1.123e+07	7.0437e+06	9.6434e+06
ZMO0302	2.7674e+07	7.3836e+06	7.33345e+06	6.14207e+06	3.9179e+06	1.40054e+07	2.62497e+06	3.02548e+07	8.37447e+06	4.92868e+06	1.60019e+07	3.69462e+06	1.67089e+07	1.4731e+07	1.00699e+07	1.43456e+07	1.55761e+07	2.2101e+07	5.1177e+06	1.25319e+07	1.02425e+07	2.12696e+07	1.41832e+07	5.54342e+06
ZMO0303	1.0306e+08	7.8541e+07	9.8071e+07	1.0145e+08	9.8914e+07	1.0301e+08	9.3846e+07	1.1138e+08	1.0817e+08	1.164e+08	1.0643e+08	1.213e+08	5.0837e+07	5.4168e+07	5.8835e+07	7.3804e+07	5.7238e+07	5.8152e+07	6.9033e+07	7.0828e+07	6.1475e+07	8.7114e+07	8.4269e+07	7.9272e+07
ZMO0305	1.2638e+08	1.4744e+08	1.6191e+08	1.5265e+08	1.2105e+08	1.7487e+08	1.4422e+08	1.2593e+08	1.5992e+08	1.5795e+08	1.3464e+08	1.2946e+08	1.4905e+08	1.8063e+08	1.6662e+08	1.6709e+08	1.518e+08	1.3648e+08	1.3858e+08	1.2268e+08	1.0163e+08	1.4088e+08	1.5337e+08	1.2025e+08
ZMO0306	1.4826e+08	1.6685e+08	1.5627e+08	1.5788e+08	1.6437e+08	1.5584e+08	1.7886e+08	2.1402e+08	1.6296e+08	2.5806e+08	2.6158e+08	2.0181e+08	1.4907e+08	1.6677e+08	1.4663e+08	1.5705e+08	1.589e+08	1.6459e+08	1.8624e+08	1.7352e+08	1.7131e+08	2.4226e+08	1.9664e+08	2.1666e+08
ZMO0307	5.5899e+07	5.3153e+07	5.6902e+07	7.3556e+07	6.5295e+07	6.5238e+07	7.7999e+07	7.4356e+07	7.4336e+07	8.9236e+07	9.2715e+07	8.0554e+07	5.6293e+07	5.848e+07	6.4342e+07	7.92349e+07	6.9522e+07	7.3177e+07	8.4741e+07	6.8987e+07	7.7997e+07	9.9475e+07	8.39961e+07	8.7792e+07
ZMO0309	1.8579e+09	1.57e+09	1.4249e+09	1.9929e+09	1.8279e+09	1.8722e+09	2.9923e+09	2.9802e+09	2.7983e+09	2.2099e+09	2.0115e+09	2.2209e+09	1.4151e+09	1.7818e+09	1.4734e+09	1.9299e+09	2.3377e+09	2.0517e+09	2.4354e+09	2.9718e+09	2.6435e+09	1.9391e+09	2.3326e+09	1.7463e+09
ZMO0311	7.7601e+08	7.6623e+08	8.4251e+08	8.9884e+08	9.1975e+08	8.9496e+08	1.0067e+09	1.1398e+09	9.3897e+08	1.1554e+09	1.3106e+09	1.3412e+09	7.802e+08	6.7339e+08	7.4596e+08	7.8267e+08	7.8393e+08	8.8581e+08	9.6601e+08	9.5187e+08	1.0895e+09	1.1537e+09	9.40909e+08	1.1989e+09
ZMO0312	5.0504e+08	4.9429e+08	5.3765e+08	5.6191e+08	5.4461e+08	5.9599e+08	6.5737e+08	6.4649e+08	6.9643e+08	7.1051e+08	7.2116e+08	7.1395e+08	4.4578e+08	5.8209e+08	5.7436e+08	6.0394e+08	6.009e+08	5.8594e+08	7.2726e+08	7.1897e+08	7.6029e+08	6.6694e+08	8.2564e+08	6.7058e+08
ZMO0313	3.1424e+07	3.8538e+07	2.3477e+07	3.9377e+07	2.788e+07	2.3752e+07	3.7126e+07	2.7984e+07	2.8387e+07	3.5509e+07	3.1231e+07	3.5062e+07	2.7783e+07	1.3125e+07	1.823e+07	2.7628e+07	2.7013e+07	3.1947e+07	2.9021e+07	2.9054e+07	3.5619e+07	3.5151e+07	2.5071e+07	2.4977e+07
ZMO0314	6.7736e+07	7.4367e+07	5.5154e+07	5.7596e+07	5.4179e+07	4.8909e+07	6.2243e+07	8.2777e+07	5.3595e+07	7.0411e+07	7.0742e+07	6.619e+07	7.2601e+07	5.2435e+07	5.4416e+07	5.6606e+07	5.336e+07	6.1565e+07	6.4908e+07	7.4623e+07	6.2648e+07	8.84639e+07	6.1006e+07	7.7902e+07
ZMO0315	5.7687e+07	6.8828e+07	5.0298e+07	6.2861e+07	6.2624e+07	6.3147e+07	4.8102e+07	7.4798e+07	4.0746e+07	6.4939e+07	5.0161e+07	5.9295e+07	5.7309e+07	2.8627e+07	6.0975e+07	5.4503e+07	4.8432e+07	5.2175e+07	5.3251e+07	5.6827e+07	5.0765e+07	4.3842e+07	4.4872e+07	4.261e+07
ZMO0318	3.1882e+09	3.379e+09	3.4235e+09	3.9856e+09	4.3655e+09	4.2882e+09	4.3814e+09	4.8581e+09	4.81299e+09	4.0911e+09	4.4573e+09	4.5336e+09	5.54451e+09	5.1488e+09	6.6573e+09	7.8303e+09	7.2166e+09	7.7648e+09	7.00291e+09	7.3739e+09	7.80669e+09	5.47449e+09	7.9951e+09	6.81471e+09
ZMO0319	6.67211e+06	5.22489e+06	1.26245e+07	1.00981e+07	2.72448e+06	6.09793e+06	7.8221e+06	3.36673e+07	6.2766e+06	7.2352e+06	9.06852e+06	1.86839e+07	1.79471e+07	1.30263e+07	1.56493e+07	6.7915e+06	1.51514e+07	3.53716e+07	6.3678e+06	1.02098e+07	6.5081e+06	6.8779e+06	4.75203e+06	2.23592e+07
ZMO0321	2.4107e+07	2.6763e+07	2.4281e+07	2.4419e+07	1.9788e+07	2.0792e+07	2.2266e+07	1.8566e+07	2.3115e+07	2.4321e+07	2.1635e+07	1.6339e+07	2.3178e+07	1.5518e+07	2.7032e+07	2.2713e+07	2.2243e+07	2.1303e+07	2.0917e+07	1.8481e+07	2.1033e+07	2.7345e+07	2.8905e+07	2.8341e+07
ZMO0322	2.5332e+08	2.8346e+08	3.0362e+08	2.8442e+08	2.4384e+08	2.7662e+08	2.4791e+08	2.3093e+08	2.5939e+08	2.6156e+08	3.1707e+08	2.441e+08	2.5069e+08	3.5373e+08	3.427e+08	3.0921e+08	2.8532e+08	2.7677e+08	2.874e+08	2.5739e+08	2.3012e+08	3.531e+08	3.0919e+08	3.3029e+08
ZMO0323	4.7689e+09	4.6299e+09	4.6634e+09	4.0716e+09	4.22e+09	4.2278e+09	4.1038e+09	3.5929e+09	4.1331e+09	3.6778e+09	3.1426e+09	4.0141e+09	4.2484e+09	4.2818e+09	4.3147e+09	3.6685e+09	4.0212e+09	3.9168e+09	3.4036e+09	3.7887e+09	3.6359e+09	2.8131e+09	3.6199e+09	2.9364e+09
ZMO0325	6.3917e+07	4.3907e+07	4.9009e+07	6.4082e+07	8.5129e+07	5.7712e+07	7.0359e+07	7.4541e+07	9.76989e+07	4.1899e+07	5.7811e+07	6.5258e+07	5.9712e+07	4.1194e+07	4.1292e+07	6.2487e+07	6.4951e+07	4.0978e+07	6.8498e+07	7.569e+07	4.8241e+07	4.3997e+07	4.4207e+07	3.8394e+07
ZMO0326	1.0676e+08	7.3735e+07	1.4908e+08	1.4623e+08	1.3879e+08	1.7195e+08	1.5027e+08	1.6662e+08	1.6511e+08	1.4662e+08	1.5454e+08	1.3945e+08	9.0385e+07	1.4025e+08	1.4971e+08	1.5856e+08	1.5774e+08	1.4428e+08	1.5075e+08	1.4762e+08	1.221e+08	1.3454e+08	1.3041e+08	1.1797e+08
ZMO0327	1.7829e+09	1.8551e+09	1.9261e+09	1.8661e+09	1.972e+09	2.057e+09	1.9181e+09	1.9878e+09	1.9933e+09	2.1063e+09	2.115e+09	1.9873e+09	1.7332e+09	1.9243e+09	1.9885e+09	1.9494e+09	1.8627e+09	2.0503e+09	2.0379e+09	1.7742e+09	2.1284e+09	2.1966e+09	2.1392e+09	2.3064e+09
ZMO0328	2.1854e+09	2.3083e+09	2.079e+09	1.4449e+09	1.7131e+09	1.554e+09	1.3788e+09	1.3081e+09	1.3975e+09	1.2999e+09	1.3793e+09	1.4718e+09	2.0351e+09	1.9185e+09	2.2154e+09	1.6033e+09	1.4565e+09	1.5976e+09	1.464e+09	1.4275e+09	1.7062e+09	1.4921e+09	1.6436e+09	1.4429e+09
ZMO0329	3.2637e+09	3.2056e+09	2.8107e+09	2.3367e+09	2.5117e+09	2.3633e+09	2.2088e+09	2.1463e+09	2.4475e+09	1.9377e+09	1.9298e+09	2.0797e+09	2.7328e+09	2.5671e+09	2.8585e+09	2.3981e+09	2.3835e+09	2.3172e+09	1.9252e+09	2.2931e+09	2.242e+09	1.5904e+09	2.0792e+09	1.8061e+09
ZMO0331	4.1257e+07	4.2094e+07	3.6145e+07	2.5186e+07	3.9953e+07	2.9736e+07	2.7263e+07	4.3301e+07	2.7415e+07	3.4792e+07	5.912e+07	3.1388e+07	2.0557e+07	2.9945e+07	3.8597e+07	6.3101e+07	3.0962e+07	6.3657e+07	9.79779e+07	3.4384e+07	1.1539e+08	9.8564e+07	4.1967e+07	1.1109e+08
ZMO0332	1.0688e+09	1.1771e+09	1.095e+09	1.3026e+09	1.4548e+09	1.1705e+09	1.1815e+09	1.136e+09	1.1521e+09	9.2674e+08	9.83151e+08	1.0742e+09	1.0549e+09	1.3497e+09	9.6881e+08	1.0609e+09	1.295e+09	1.3954e+09	1.004e+09	1.2412e+09	1.3475e+09	9.8148e+08	1.0168e+09	1.1472e+09
ZMO0335	4.2476e+08	4.8207e+08	4.6542e+08	3.7786e+08	4.1965e+08	3.7926e+08	4e+08	4.3419e+08	4.1895e+08	5.4382e+08	5.6032e+08	5.1919e+08	4.9579e+08	5.2501e+08	5.1904e+08	4.6349e+08	4.3832e+08	4.6642e+08	4.7036e+08	4.3867e+08	4.9015e+08	6.1638e+08	5.1919e+08	6.0753e+08
ZMO0336	1.7643e+07	1.5584e+07	1.2114e+07	9.3131e+06	1.1588e+07	1.0386e+07	9.2409e+06	1.1335e+07	9.027e+06	9.5446e+06	8.5874e+06	1.1369e+07	1.5565e+07	2.1978e+07	1.0353e+07	9.96931e+06	8.9574e+06	9.5248e+06	1.1477e+07	9.86109e+06	1.448e+07	3.55483e+06	7.4973e+06	8.9693e+06
ZMO0339	1.0255e+10	9.86571e+09	1.0755e+10	1.264e+10	1.1867e+10	1.3427e+10	1.2093e+10	1.2148e+10	1.3656e+10	1.1417e+10	1.1384e+10	1.1913e+10	1.0773e+10	1.2682e+10	1.2565e+10	1.4511e+10	1.3891e+10	1.4731e+10	1.3377e+10	1.2783e+10	1.3814e+10	1.1037e+10	1.4274e+10	1.2291e+10
ZMO0341	1.6939e+08	1.9167e+08	1.5722e+08	1.7743e+08	1.8809e+08	1.7989e+08	1.8431e+08	1.8032e+08	2.0347e+08	2.1642e+08	2.7025e+08	2.3253e+08	1.4355e+08	1.3524e+08	1.5865e+08	1.9037e+08	1.6748e+08	1.5969e+08	2.0173e+08	1.5754e+08	2.0483e+08	2.2452e+08	1.989e+08	2.2546e+08
ZMO0342	2.5555e+09	2.6084e+09	2.7965e+09	2.0019e+09	2.026e+09	2.2243e+09	1.8505e+09	1.7875e+09	2.1245e+09	1.9205e+09	1.7105e+09	1.9808e+09	2.5775e+09	3.0916e+09	2.7792e+09	1.8653e+09	2.0225e+09	1.8102e+09	1.711e+09	1.7658e+09	1.6707e+09	1.3666e+09	1.905e+09	1.4579e+09
ZMO0343	1.1346e+08	1.1287e+08	1.0455e+08	1.2209e+08	1.1207e+08	1.326e+08	1.3227e+08	1.2482e+08	1.3271e+08	1.7798e+08	1.7063e+08	1.4175e+08	9.95359e+07	1.0367e+08	9.7465e+07	1.141e+08	1.3221e+08	1.1509e+08	1.3311e+08	1.2672e+08	1.1247e+08	1.4268e+08	1.4352e+08	1.5148e+08
ZMO0344	2.6357e+09	2.5033e+09	2.6143e+09	2.7393e+09	2.7265e+09	2.8175e+09	2.7329e+09	2.4678e+09	2.8359e+09	2.2936e+09	2.2174e+09	2.6422e+09	2.339e+09	2.5659e+09	2.6126e+09	2.8283e+09	2.9121e+09	2.8644e+09	2.5936e+09	2.7955e+09	2.8467e+09	2.09e+09	2.7291e+09	2.3025e+09
ZMO0345	5.2845e+07	5.4822e+07	5.5668e+07	6.7115e+07	6.4637e+07	5.8427e+07	6.5573e+07	7.1485e+07	5.7249e+07	6.6535e+07	6.8973e+07	6.8798e+07	5.4629e+07	3.6404e+07	4.7544e+07	6.0279e+07	6.0108e+07	6.0234e+07	5.7901e+07	5.5481e+07	5.1947e+07	7.82891e+07	6.1469e+07	7.0907e+07
ZMO0346	2.3404e+07	3.258e+07	2.2946e+07	2.9107e+07	3.434e+07	2.8022e+07	3.1325e+07	4.0686e+07	2.6231e+07	3.8383e+07	3.6435e+07	3.5996e+07	3.2717e+07	2.4549e+07	1.8234e+07	2.1806e+07	2.1968e+07	2.8753e+07	3.2175e+07	2.8556e+07	3.8579e+07	3.3304e+07	2.5631e+07	3.1092e+07
ZMO0347	1.0002e+09	1.1013e+09	1.1765e+09	1.0879e+09	9.6599e+08	1.1961e+09	1.0309e+09	1.282e+09	1.2575e+09	1.3552e+09	1.314e+09	1.2e+09	1.13e+09	1.6108e+09	1.0869e+09	1.3282e+09	1.2649e+09	1.3832e+09	1.5255e+09	1.381e+09	1.3975e+09	1.3758e+09	1.5656e+09	1.5241e+09
ZMO0348	1.9872e+09	1.876e+09	2.1877e+09	2.0346e+09	2.0079e+09	2.0459e+09	1.8864e+09	1.9668e+09	1.9947e+09	2.3198e+09	2.4029e+09	2.4377e+09	2.0203e+09	2.4526e+09	2.1187e+09	2.0894e+09	2.1163e+09	2.0742e+09	2.0352e+09	2.2372e+09	2.3274e+09	2.3142e+09	2.4421e+09	2.4759e+09
ZMO0349	1.7708e+07	1.1384e+07	1.6605e+07	2.2985e+07	2.6655e+07	2.1732e+07	2.3505e+07	2.3968e+07	2.1864e+07	2.2459e+07	2.6736e+07	2.4306e+07	1.8964e+07	5.7768e+06	1.7733e+07	2.4397e+07	2.284e+07	2.3896e+07	2.5636e+07	2.2551e+07	2.2269e+07	3.1483e+07	2.6272e+07	3.4319e+07
ZMO0350	2.2578e+08	1.7821e+08	2.2873e+08	2.2641e+08	2.3028e+08	2.1407e+08	2.2566e+08	2.4464e+08	2.4336e+08	2.8008e+08	2.9457e+08	2.5098e+08	1.8131e+08	2.4089e+08	2.2347e+08	2.6149e+08	2.4077e+08	2.4691e+08	2.5815e+08	2.2771e+08	2.175e+08	3.3677e+08	3.0628e+08	3.0583e+08
ZMO0351	2.1734e+08	2.3869e+08	2.2731e+08	2.0425e+08	1.8795e+08	1.7164e+08	1.9437e+08	1.9542e+08	1.7095e+08	2.3696e+08	2.0725e+08	2.0895e+08	2.0998e+08	1.9486e+08	2.1374e+08	1.7825e+08	1.5837e+08	1.8416e+08	1.9562e+08	1.712e+08	1.8529e+08	2.4287e+08	1.99e+08	2.1537e+08
ZMO0352	3.8181e+08	4.0058e+08	4.4139e+08	4.0178e+08	3.8711e+08	4.1693e+08	4.122e+08	3.6107e+08	4.064e+08	4.4957e+08	4.3665e+08	4.2861e+08	3.937e+08	5.2428e+08	4.9297e+08	4.6489e+08	4.1639e+08	4.4913e+08	4.6726e+08	4.3391e+08	4.8406e+08	4.9757e+08	4.7732e+08	5.2283e+08
ZMO0353	5.7322e+08	5.8119e+08	5.9675e+08	5.0929e+08	5.5797e+08	5.2403e+08	4.8669e+08	5.1297e+08	5.0813e+08	5.2084e+08	5.488e+08	5.6552e+08	5.6567e+08	6.4836e+08	6.9271e+08	5.2681e+08	5.8729e+08	5.9819e+08	5.905e+08	5.9686e+08	5.7865e+08	6.4088e+08	6.1978e+08	6.9603e+08
ZMO0354	4.6093e+08	4.3126e+08	4.0538e+08	4.6318e+08	4.2871e+08	4.385e+08	4.6567e+08	4.9714e+08	4.7634e+08	5.5527e+08	5.8032e+08	5.2953e+08	3.911e+08	3.8272e+08	3.7577e+08	4.4515e+08	4.1422e+08	4.4538e+08	4.851e+08	4.7025e+08	5.4261e+08	5.3489e+08	4.5878e+08	5.3047e+08
ZMO0355	1.6667e+09	1.7269e+09	1.7992e+09	1.6027e+09	1.6479e+09	1.6332e+09	1.6142e+09	1.8334e+09	1.7516e+09	1.9776e+09	2.0012e+09	1.8357e+09	1.4205e+09	1.6279e+09	1.5226e+09	1.3684e+09	1.378e+09	1.4704e+09	1.5829e+09	1.4683e+09	1.7925e+09	1.7208e+09	1.6114e+09	1.7961e+09
ZMO0356	9.3224e+07	8.1243e+07	8.0129e+07	6.8296e+07	6.1036e+07	6.4704e+07	5.3359e+07	6.8609e+07	6.4124e+07	6.1891e+07	5.0607e+07	5.4785e+07	7.7813e+07	6.1283e+07	7.3054e+07	4.9539e+07	5.1998e+07	5.7923e+07	4.595e+07	4.5857e+07	4.163e+07	4.1067e+07	4.5495e+07	3.6507e+07
ZMO0359	2.2164e+08	2.4829e+08	2.4777e+08	2.1379e+08	1.8599e+08	2.3e+08	1.8909e+08	2.5869e+08	2.483e+08	2.2197e+08	2.3315e+08	1.9314e+08	2.3908e+08	2.7076e+08	2.4286e+08	2.3164e+08	2.0684e+08	1.9727e+08	2.2203e+08	2.1991e+08	1.8578e+08	2.2845e+08	2.3386e+08	2.0745e+08
ZMO0361	4.4449e+07	4.4677e+07	6.1793e+07	3.6654e+07	3.7887e+07	4.3225e+07	3.7222e+07	4.4138e+07	3.8378e+07	3.4386e+07	4.2119e+07	4.0835e+07	4.9509e+07	5.1972e+07	3.3598e+07	2.4599e+07	2.546e+07	1.94e+07	2.0953e+07	2.0626e+07	2.1396e+07	2.6433e+07	2.5124e+07	2.0034e+07
ZMO0362	8.6658e+08	9.20089e+08	8.4114e+08	1.0563e+09	1.083e+09	1.0343e+09	1.3406e+09	1.3453e+09	1.2223e+09	1.6133e+09	1.7661e+09	1.527e+09	6.4716e+08	6.7366e+08	6.1345e+08	1.0586e+09	1.0032e+09	1.0954e+09	1.3546e+09	1.2265e+09	1.472e+09	1.5601e+09	1.4077e+09	1.5514e+09
ZMO0363	3.5252e+08	4.8007e+08	3.6154e+08	3.4533e+08	3.1496e+08	3.3698e+08	3.2996e+08	3.013e+08	2.8155e+08	2.8078e+08	2.8881e+08	3.2514e+08	4.5054e+08	5.2464e+08	3.9729e+08	3.4132e+08	3.1782e+08	3.4612e+08	3.2152e+08	3.0306e+08	3.8571e+08	3.031e+08	2.9195e+08	2.9232e+08
ZMO0364	3.3991e+08	3.406e+08	3.275e+08	3.5001e+08	3.1591e+08	2.9759e+08	3.4574e+08	3.6402e+08	3.0737e+08	4.0437e+08	4.199e+08	3.9268e+08	3.4036e+08	3.013e+08	3.3027e+08	3.4476e+08	2.9096e+08	3.0922e+08	3.5287e+08	3.1793e+08	3.8063e+08	4.3577e+08	3.5974e+08	4.1736e+08
ZMO0366	1.8343e+09	1.5052e+09	1.6778e+09	1.6119e+09	1.6777e+09	1.6581e+09	1.7359e+09	2.154e+09	1.817e+09	2.2352e+09	1.9678e+09	1.9954e+09	1.9164e+09	2.1135e+09	1.8161e+09	1.6135e+09	1.9968e+09	1.9755e+09	1.811e+09	2.2648e+09	1.9749e+09	2.1433e+09	2.2176e+09	2.1259e+09
ZMO0367	2.5727e+10	2.5773e+10	2.7808e+10	2.7506e+10	2.8287e+10	2.9218e+10	2.8161e+10	2.8849e+10	3.1824e+10	2.8865e+10	3.1611e+10	3.0532e+10	2.7842e+10	3.2707e+10	3.317e+10	3.4299e+10	3.337e+10	3.4187e+10	3.4418e+10	3.1895e+10	3.5872e+10	2.92e+10	3.6342e+10	3.329e+10
ZMO0368	3.3341e+10	3.4624e+10	3.3913e+10	3.6106e+10	3.5685e+10	3.5735e+10	3.7482e+10	3.5717e+10	3.8599e+10	3.273e+10	3.3989e+10	3.7643e+10	3.7123e+10	4.0855e+10	3.8731e+10	3.8852e+10	4.0035e+10	3.9866e+10	3.9607e+10	3.7918e+10	4.3117e+10	3.2686e+10	4.1224e+10	3.5848e+10
ZMO0369	1.8039e+10	1.9567e+10	1.7922e+10	1.7961e+10	2.0157e+10	1.8997e+10	1.8696e+10	1.8863e+10	1.905e+10	1.8239e+10	1.7846e+10	1.8349e+10	2.0867e+10	1.7852e+10	2.121e+10	1.9847e+10	2.2119e+10	2.2079e+10	2.0956e+10	2.0985e+10	2.3031e+10	1.7989e+10	2.1162e+10	1.9006e+10
ZMO0371	6.7011e+07	6.6856e+07	8.2443e+07	4.7066e+07	4.5719e+07	5.64e+07	4.3381e+07	4.7948e+07	5.2878e+07	6.2968e+07	7.3768e+07	5.0413e+07	6.8142e+07	9.2754e+07	7.5218e+07	6.0697e+07	6.0043e+07	6.1892e+07	5.2008e+07	4.4381e+07	5.2699e+07	7.9872e+07	6.1983e+07	7.6149e+07
ZMO0372	1.34653e+07	9.01678e+06	1.02488e+07	8.6286e+06	2.38785e+07	7.9956e+06	4.76646e+07	4.45796e+06	4.5767e+06	4.1259e+06	1.15339e+07	1.3257e+07	6.9688e+06	4.9426e+06	1.95941e+07	1.03813e+07	4.98015e+06	2.32225e+07	2.277e+07	1.65878e+07	2.58668e+07	2.88861e+07	1.17175e+07	5.9425e+06
ZMO0374	1.3068e+07	6.87057e+06	7.5676e+06	6.5059e+06	7.2001e+06	4.3758e+06	4.28747e+06	5.9357e+06	2.9823e+06	2.42159e+07	2.75338e+07	5.3241e+06	8.5458e+06	8.3651e+06	1.63967e+07	4.9594e+06	3.6731e+06	5.3821e+06	5.4584e+06	5.4622e+06	7.3638e+06	7.5257e+06	6.54385e+06	7.0908e+06
ZMO0375	1.1322e+07	1.5411e+08	1.5551e+08	2.5086e+07	8.5276e+07	9.15041e+07	1.7356e+07	7.4902e+07	6.7058e+07	8.0008e+07	1.1287e+08	1.2024e+08	1.2005e+08	2.1042e+08	2.1957e+08	1.2146e+08	9.52169e+07	3.6944e+07	2.7726e+07	1.4122e+07	1.5222e+08	1.1983e+08	1.1221e+08	1.4545e+08
ZMO0376	3.1987e+09	3.4872e+09	3.6694e+09	3.6705e+09	3.6618e+09	3.6548e+09	3.7317e+09	4.1462e+09	3.7226e+09	5.33521e+09	5.79331e+09	5.08641e+09	3.537e+09	3.6674e+09	3.7456e+09	3.4701e+09	3.5012e+09	3.635e+09	3.5869e+09	3.65e+09	3.943e+09	4.3256e+09	4.1063e+09	4.4005e+09
ZMO0377	2.48e+07	1.8063e+07	1.8034e+07	1.4395e+07	1.2234e+07	1.4312e+07	1.8018e+07	1.5369e+07	1.7332e+07	1.7823e+07	1.9236e+07	2.1223e+07	2.2802e+07	1.9668e+07	1.2851e+07	1.4465e+07	1.2938e+07	1.1885e+07	1.3731e+07	1.2067e+07	1.408e+07	1.6602e+07	1.5398e+07	1.8821e+07
ZMO0398	1.3427e+07	2.13522e+07	2.25797e+07	1.01974e+07	9.59279e+06	6.53328e+06	8.64206e+06	1.02622e+07	1.07472e+07	1.256e+06	2.00496e+07	1.36256e+07	8.02845e+06	6.88528e+06	1.23746e+07	3.89979e+07	2.44533e+06	1.0653e+07	1.59041e+07	1.74808e+07	5.07226e+06	6.97403e+06	7.28404e+06	1.53294e+07
ZMO0401	1.4212e+07	1.2383e+07	1.4759e+07	1.5802e+07	1.8203e+07	1.689e+07	1.4594e+07	1.6494e+07	1.6825e+07	2.8081e+07	1.5883e+07	1.6437e+07	1.5441e+07	1.5781e+07	1.5136e+07	2.0216e+07	2.1348e+07	1.6461e+07	1.7471e+07	1.9857e+07	1.3035e+07	2.0239e+07	1.8697e+07	1.9147e+07
ZMO0402	5.4926e+08	5.6477e+08	5.5497e+08	5.7388e+08	5.7526e+08	5.8447e+08	5.8442e+08	6.107e+08	5.9584e+08	7.3433e+08	7.1175e+08	6.0832e+08	5.2026e+08	6.4682e+08	5.0786e+08	5.2983e+08	5.3608e+08	4.9167e+08	5.5154e+08	5.4081e+08	4.9052e+08	7.0411e+08	6.2927e+08	5.9476e+08
ZMO0403	1.2303e+08	1.4883e+08	1.2744e+08	1.2281e+08	1.022e+08	8.9133e+07	1.0896e+08	1.0549e+08	9.7098e+07	1.081e+08	1.0509e+08	1.1773e+08	1.2654e+08	1.3528e+08	9.5815e+07	1.0891e+08	1.1055e+08	1.1471e+08	9.75111e+07	1.0649e+08	1.2904e+08	1.1251e+08	1.0232e+08	1.1541e+08
ZMO0405	2.8502e+09	3.2909e+09	3.5867e+09	3.4295e+09	3.0775e+09	3.5496e+09	3.4487e+09	3.5509e+09	3.6304e+09	4.3197e+09	4.8895e+09	4.26e+09	2.9105e+09	3.0021e+09	3.1923e+09	3.143e+09	2.9019e+09	3.0127e+09	3.6672e+09	3.0694e+09	3.7767e+09	4.559e+09	3.8054e+09	4.4128e+09
ZMO0406	1.1462e+07	1.5105e+07	1.3591e+07	1.1964e+07	9.99114e+06	1.1401e+07	1.0123e+07	1.4903e+07	1.0316e+07	1.6023e+07	1.4335e+07	1.4566e+07	9.54701e+06	2.5687e+07	1.4159e+07	9.66531e+06	1.085e+07	1.5654e+07	1.2537e+07	1.0746e+07	1.0793e+07	1.5335e+07	1.123e+07	1.5608e+07
ZMO0407	2.0578e+09	1.9106e+09	1.6864e+09	1.4369e+09	1.4508e+09	1.5385e+09	1.4646e+09	1.7513e+09	1.397e+09	1.5168e+09	1.565e+09	1.3335e+09	1.7398e+09	2.1198e+09	1.7975e+09	1.7741e+09	1.6208e+09	1.6738e+09	1.6376e+09	1.4832e+09	1.5205e+09	1.4836e+09	1.3853e+09	1.5276e+09
ZMO0408	5.756e+09	6.92009e+09	6.58339e+09	4.9947e+09	5.09151e+09	5.0728e+09	4.4898e+09	3.8415e+09	4.5423e+09	3.6816e+09	3.7247e+09	4.5522e+09	5.97329e+09	7.2175e+09	6.1785e+09	4.5142e+09	4.9139e+09	4.61791e+09	3.5781e+09	4.1729e+09	4.1334e+09	3.5422e+09	3.9709e+09	3.8824e+09
ZMO0409	2.1175e+09	2.0221e+09	2.3597e+09	1.9669e+09	1.7204e+09	1.8759e+09	1.8564e+09	1.6773e+09	1.9898e+09	1.5504e+09	1.3498e+09	1.7781e+09	1.8859e+09	1.5492e+09	2.0269e+09	1.767e+09	2.0564e+09	1.8542e+09	1.5909e+09	1.8958e+09	1.614e+09	1.1408e+09	1.656e+09	1.3183e+09
ZMO0410	7.98919e+08	8.7446e+08	1.0191e+09	7.5726e+08	7.6021e+08	8.4634e+08	7.3734e+08	7.8284e+08	8.1985e+08	8.1658e+08	7.8694e+08	8.1503e+08	8.0172e+08	1.0186e+09	8.9363e+08	6.762e+08	7.4903e+08	7.1433e+08	6.8958e+08	7.3891e+08	6.8427e+08	5.8822e+08	7.2262e+08	6.1749e+08
ZMO0411	4.8166e+08	5.8379e+08	5.0913e+08	4.2726e+08	4.2515e+08	4.3309e+08	4.1537e+08	4.3064e+08	4.095e+08	4.7128e+08	5.348e+08	4.7876e+08	5.0763e+08	5.2998e+08	5.0881e+08	4.0972e+08	3.7591e+08	4.0844e+08	4.7313e+08	4.18e+08	4.4333e+08	4.9856e+08	4.8349e+08	5.0949e+08
ZMO0413	1.2257e+07	1.077e+07	1.3052e+07	1.4506e+07	2.5084e+07	1.8922e+07	3.0472e+07	3.1396e+07	2.0809e+07	2.2561e+07	3.7126e+07	3.465e+07	1.4604e+07	9.9035e+06	7.2939e+06	1.2906e+07	2.1498e+07	1.7153e+07	3.1868e+07	2.8177e+07	3.3118e+07	3.0843e+07	3.0493e+07	2.9876e+07
ZMO0414	1.009e+09	8.9602e+08	1.0385e+09	1.0427e+09	8.99451e+08	1.0601e+09	1.0948e+09	1.1573e+09	9.9523e+08	9.98651e+08	9.0776e+08	9.4303e+08	9.1213e+08	9.46879e+08	9.25469e+08	9.5309e+08	9.92011e+08	1.0045e+09	1.0086e+09	1.0511e+09	9.67161e+08	8.2021e+08	1.0208e+09	8.2813e+08
ZMO0416	4.0258e+07	4.1448e+07	4.3774e+07	3.7682e+07	3.7984e+07	3.3551e+07	3.9319e+07	4.6166e+07	4.5373e+07	4.5103e+07	4.9768e+07	4.8871e+07	4.3663e+07	4.333e+07	4.029e+07	4.3347e+07	4.1167e+07	4.5795e+07	4.5545e+07	4.3436e+07	4.4282e+07	5.169e+07	4.6283e+07	5.9439e+07
ZMO0419	1.8764e+08	1.6064e+08	1.6631e+08	1.5327e+08	1.4138e+08	1.3555e+08	1.539e+08	1.8516e+08	1.2537e+08	1.7574e+08	1.7337e+08	1.5495e+08	2.069e+08	1.6973e+08	1.6646e+08	1.3995e+08	1.4913e+08	1.6599e+08	1.7445e+08	1.5294e+08	1.568e+08	1.9263e+08	1.6374e+08	1.7322e+08
ZMO0420	2.5034e+08	2.6006e+08	2.1968e+08	2.2424e+08	2.4472e+08	2.1588e+08	2.177e+08	2.1436e+08	2.0595e+08	2.1435e+08	1.8782e+08	2.0861e+08	2.174e+08	2.4445e+08	2.6293e+08	2.3651e+08	2.499e+08	2.8731e+08	2.1978e+08	2.5019e+08	2.6555e+08	1.8167e+08	2.2525e+08	2.0619e+08
ZMO0421	2.275e+09	2.1511e+09	2.2024e+09	2.1379e+09	2.3675e+09	2.4393e+09	2.2216e+09	2.0945e+09	2.3601e+09	2.3229e+09	2.7127e+09	2.6041e+09	2.3769e+09	2.3887e+09	2.3667e+09	2.3198e+09	2.4754e+09	2.5302e+09	2.2914e+09	2.3878e+09	2.521e+09	2.2833e+09	2.5964e+09	2.5678e+09
ZMO0422	8.86041e+06	1.0822e+07	6.4699e+06	1.0169e+07	1.0206e+07	8.32e+06	9.94809e+06	1.0013e+07	1.0052e+07	1.0081e+07	1.155e+07	1.1974e+07	9.30805e+06	2.46345e+07	1.1895e+07	1.04e+07	9.3597e+06	9.2301e+06	1.3378e+07	1.0189e+07	1.2043e+07	1.6584e+07	1.0633e+07	1.6337e+07
ZMO0423	5.2091e+08	5.6912e+08	6.3564e+08	7.2292e+08	5.9879e+08	7.1456e+08	7.1114e+08	6.5833e+08	7.4251e+08	7.1416e+08	6.9866e+08	6.6566e+08	6.5939e+08	5.9273e+08	6.9148e+08	7.7528e+08	7.8456e+08	7.7579e+08	7.8391e+08	7.1693e+08	6.7716e+08	7.2704e+08	8.098e+08	8.05239e+08
ZMO0425	1.0681e+09	1.2773e+09	1.0976e+09	1.2478e+09	1.2314e+09	1.156e+09	1.1695e+09	1.1406e+09	1.1183e+09	1.072e+09	1.0592e+09	1.1945e+09	1.1621e+09	1.2082e+09	1.119e+09	1.2104e+09	1.343e+09	1.38e+09	1.1843e+09	1.2783e+09	1.4105e+09	1.0653e+09	1.2711e+09	1.1872e+09
ZMO0426	4.747e+08	4.3118e+08	5.8411e+08	6.3466e+08	6.1246e+08	6.6843e+08	6.634e+08	6.329e+08	6.8804e+08	6.8636e+08	7.5998e+08	6.2329e+08	5.9405e+08	6.0025e+08	7.1809e+08	7.2572e+08	6.2448e+08	7.1762e+08	7.1901e+08	6.6423e+08	7.3884e+08	7.2146e+08	8.49231e+08	7.1155e+08
ZMO0427	1.457e+09	1.3995e+09	1.539e+09	1.5041e+09	1.5857e+09	1.5743e+09	1.4744e+09	1.5488e+09	1.7406e+09	1.4726e+09	1.5528e+09	1.4779e+09	1.4864e+09	1.6966e+09	1.7963e+09	1.8228e+09	1.5901e+09	1.7891e+09	1.7104e+09	1.5065e+09	1.884e+09	1.4431e+09	1.7439e+09	1.538e+09
ZMO0428	8.262e+07	1.0845e+08	3.3364e+07	8.0783e+07	7.1952e+07	3.3345e+07	1.8803e+08	1.5781e+08	7.0532e+07	2.1726e+08	1.2977e+08	2.2806e+08	9.0446e+07	1.7424e+07	4.2866e+07	6.1664e+07	5.5608e+07	9.4399e+07	1.2152e+08	1.475e+08	1.639e+08	1.6576e+08	6.2473e+07	1.5228e+08
ZMO0429	1.462e+08	1.3751e+08	1.2886e+08	1.2992e+08	1.6402e+08	1.3787e+08	2.0681e+08	2.0757e+08	1.892e+08	2.7786e+08	2.7479e+08	2.3931e+08	1.2686e+08	1.1957e+08	1.3414e+08	1.4185e+08	1.7286e+08	1.5907e+08	2.1665e+08	2.4054e+08	2.4064e+08	2.2391e+08	2.1627e+08	2.7123e+08
ZMO0430	2.9441e+08	2.9487e+08	4.0643e+08	3.3767e+08	2.8318e+08	3.47e+08	2.6258e+08	2.7374e+08	3.2498e+08	4.1414e+08	4.0387e+08	3.8885e+08	3.3332e+08	3.8541e+08	3.8069e+08	2.9471e+08	2.8722e+08	2.3647e+08	2.6786e+08	2.5394e+08	2.3697e+08	3.4678e+08	3.3494e+08	3.0403e+08
ZMO0431	3.266e+09	3.1523e+09	3.158e+09	3.2464e+09	3.4969e+09	3.3209e+09	3.2846e+09	3.5878e+09	3.7804e+09	3.3958e+09	3.6297e+09	3.8956e+09	3.1938e+09	4.0796e+09	4.1587e+09	3.5852e+09	4.1226e+09	3.7886e+09	3.5392e+09	3.9669e+09	4.527e+09	2.922e+09	4.0138e+09	3.2724e+09
ZMO0432	6.01e+08	4.7581e+08	5.9555e+08	9.7437e+08	9.34349e+08	9.5409e+08	1.0671e+09	9.3766e+08	1.1259e+09	8.83901e+08	8.3277e+08	8.6021e+08	6.0329e+08	5.7783e+08	6.1886e+08	9.461e+08	1.0629e+09	9.1956e+08	9.2972e+08	9.1268e+08	7.7342e+08	8.07e+08	8.5929e+08	8.0501e+08
ZMO0433	1.1741e+09	1.2367e+09	1.3126e+09	1.137e+09	1.198e+09	1.0634e+09	1.0694e+09	9.6273e+08	1.0356e+09	9.4598e+08	8.8714e+08	1.0966e+09	1.2176e+09	1.5075e+09	1.2561e+09	1.102e+09	1.1735e+09	1.1332e+09	9.6717e+08	1.0287e+09	1.0576e+09	8.2472e+08	1.0912e+09	9.79779e+08
ZMO0435	9.3419e+08	8.9896e+08	1.0878e+09	1.0108e+09	1.1202e+09	1.2607e+09	7.4974e+08	8.31e+08	9.89521e+08	3.5978e+08	4.9031e+08	3.99e+08	8.8216e+08	1.2879e+09	1.0236e+09	1.0416e+09	1.1362e+09	1.1704e+09	7.4466e+08	8.2358e+08	8.34311e+08	4.2371e+08	3.1557e+08	4.7422e+08
ZMO0436	2.4303e+07	5.98727e+06	1.6941e+07	1.12155e+07	2.3425e+07	2.2566e+07	2.2454e+07	2.914e+07	1.13113e+07	3.2456e+07	2.0642e+07	4.27662e+06	9.91151e+06	3.66746e+06	7.55109e+06	1.34162e+07	5.44849e+06	1.4112e+07	4.84351e+06	4.04804e+06	1.5421e+07	1.11325e+07	7.96963e+06	3.27304e+06
ZMO0439	9.4537e+08	9.8085e+08	9.1989e+08	7.8482e+08	7.7855e+08	8.4693e+08	7.6693e+08	8.6742e+08	8.9175e+08	9.6087e+08	9.8914e+08	9.62761e+08	8.85761e+08	1.111e+09	9.18091e+08	7.6989e+08	8.0626e+08	7.8904e+08	8.1305e+08	8.5401e+08	8.85521e+08	9.65239e+08	9.8451e+08	9.7963e+08
ZMO0441	1.4033e+09	1.3639e+09	1.3948e+09	1.6737e+09	1.6084e+09	1.6934e+09	1.5094e+09	1.5963e+09	1.6355e+09	1.7101e+09	1.9741e+09	1.6639e+09	1.5781e+09	1.5148e+09	1.6083e+09	2.0047e+09	1.8395e+09	1.9748e+09	2.0046e+09	1.7879e+09	2.0033e+09	2.2951e+09	2.2112e+09	2.3624e+09
ZMO0442	1.2133e+09	1.0805e+09	1.307e+09	1.4108e+09	1.154e+09	1.5324e+09	1.2776e+09	1.124e+09	1.461e+09	1.3398e+09	9.2364e+08	1.2977e+09	1.018e+09	1.4595e+09	1.2389e+09	1.235e+09	1.4178e+09	1.3058e+09	1.0637e+09	1.2811e+09	1.1375e+09	9.1783e+08	1.3769e+09	1.0142e+09
ZMO0443	2.48e+08	1.9688e+08	1.8437e+08	1.3394e+08	1.1018e+08	1.1795e+08	1.1053e+08	8.0002e+07	9.2003e+07	1.2284e+08	9.2204e+07	9.41459e+07	2.8773e+08	4.0949e+08	3.1727e+08	1.4672e+08	1.876e+08	1.5795e+08	1.3009e+08	1.2368e+08	1.3263e+08	2.1651e+08	1.8785e+08	1.9066e+08
ZMO0444	4.3396e+08	5.0836e+08	5.4187e+08	4.4176e+08	4.4391e+08	4.5869e+08	4.4604e+08	5.6167e+08	4.5098e+08	5.2952e+08	4.8833e+08	4.3687e+08	4.8008e+08	5.8334e+08	6.2009e+08	4.75e+08	4.7144e+08	4.6576e+08	4.8051e+08	5.3257e+08	4.2932e+08	5.3339e+08	5.2466e+08	4.8372e+08
ZMO0445	1.4924e+08	1.946e+08	1.8155e+08	1.6813e+08	1.4352e+08	1.6261e+08	1.4085e+08	1.2479e+08	1.3113e+08	7.6665e+07	6.4285e+07	6.9197e+07	1.7042e+08	1.8026e+08	1.8291e+08	1.4754e+08	1.6602e+08	1.3186e+08	1.2903e+08	1.4273e+08	1.3064e+08	8.1037e+07	8.8529e+07	5.8808e+07
ZMO0446	1.8669e+07	1.55061e+07	8.32351e+06	7.55939e+06	1.57972e+07	9.79537e+06	6.47436e+06	5.36809e+06	1.16887e+07	6.88009e+06	6.2431e+06	9.67372e+06	1.55452e+07	1.2041e+07	1.04353e+07	3.87994e+06	9.93118e+06	7.6643e+06	5.10908e+06	9.79109e+06	2.10283e+07	1.54491e+07	1.23251e+07	9.04213e+06
ZMO0447	1.0595e+07	6.7893e+06	1.0722e+07	1.096e+07	1.3594e+07	1.4833e+07	1.2245e+07	2.0992e+07	1.7706e+07	1.53445e+07	1.7291e+07	9.55921e+06	9.71608e+06	4.0082e+06	1.4679e+07	1.3185e+07	1.2949e+07	9.3982e+06	1.8476e+07	1.3101e+07	1.1105e+07	1.6393e+07	1.9619e+07	1.7176e+07
ZMO0448	4.8053e+07	5.6521e+07	3.4662e+07	5.7385e+06	7.96921e+06	7.4878e+06	9.57781e+06	6.67792e+06	3.02908e+07	5.13174e+06	3.15719e+07	1.85298e+07	1.7066e+07	3.0986e+07	3.1587e+07	1.1158e+07	5.3346e+06	1.3204e+07	7.50878e+06	8.00674e+06	2.6021e+06	1.96349e+07	1.62812e+07	1.79337e+07
ZMO0449	1.7825e+09	2.1202e+09	1.9622e+09	1.6462e+09	1.9961e+09	1.7397e+09	1.779e+09	2.2345e+09	1.6668e+09	2.0638e+09	2.1951e+09	2.3443e+09	1.9621e+09	2.4679e+09	1.8541e+09	1.6836e+09	1.6054e+09	1.9261e+09	1.9077e+09	1.912e+09	2.2829e+09	2.1219e+09	1.9646e+09	2.1558e+09
ZMO0452	9.5916e+08	9.3312e+08	9.4197e+08	8.41891e+08	8.7499e+08	8.3679e+08	7.6628e+08	8.9071e+08	8.6352e+08	7.3357e+08	6.7607e+08	7.4361e+08	9.53891e+08	1.0662e+09	1.0235e+09	8.1487e+08	8.2579e+08	8.1775e+08	7.5925e+08	8.4721e+08	7.6268e+08	6.49e+08	7.518e+08	6.2754e+08
ZMO0453	2.202e+09	2.1296e+09	2.0983e+09	1.8086e+09	1.8831e+09	1.8061e+09	1.8656e+09	1.7826e+09	1.8921e+09	2.2114e+09	2.2355e+09	2.2459e+09	1.9569e+09	2.0139e+09	1.8725e+09	1.7546e+09	1.8151e+09	1.7049e+09	1.8272e+09	1.9021e+09	1.9917e+09	2.2266e+09	2.1838e+09	2.1779e+09
ZMO0454	7.6166e+09	8.1689e+09	8.05349e+09	9.70119e+09	1.028e+10	9.7968e+09	9.9319e+09	1.0035e+10	1.0167e+10	1.0078e+10	1.059e+10	1.0624e+10	8.08881e+09	7.95321e+09	9.0655e+09	1.0423e+10	9.9621e+09	1.0961e+10	1.114e+10	1.0411e+10	1.2771e+10	1.3088e+10	1.1937e+10	1.3471e+10
ZMO0456	1.17328e+07	6.194e+06	5.6238e+06	1.77833e+07	3.0318e+06	2.9559e+06	2.0943e+06	2.0538e+06	1.54576e+07	3.232e+06	2.01144e+07	2.28776e+07	9.8021e+06	7.9096e+06	5.5935e+06	4.7371e+06	3.6312e+06	4.4361e+06	2.7973e+06	3.2083e+06	3.3066e+06	3.7598e+06	3.38167e+07	3.3352e+06
ZMO0457	4.8214e+07	4.5443e+07	3.466e+07	4.8383e+07	4.5982e+07	3.5328e+07	5.6342e+07	5.0213e+07	3.143e+07	4.9322e+07	4.0078e+07	4.7008e+07	5.236e+07	2.7074e+07	3.3764e+07	5.0206e+07	4.5821e+07	6.2536e+07	5.8291e+07	5.2236e+07	4.7343e+07	6.6028e+07	3.849e+07	6.2533e+07
ZMO0458	9.4892e+07	8.771e+07	9.5602e+07	9.5943e+07	1.0289e+08	9.2024e+07	1.065e+08	1.1389e+08	8.3583e+07	1.3397e+08	1.0569e+08	1.1552e+08	8.6501e+07	7.6307e+07	6.7902e+07	8.52091e+07	9.4971e+07	1.0021e+08	1.0403e+08	9.6016e+07	8.8695e+07	1.0834e+08	8.6264e+07	1.2151e+08
ZMO0459	3.9584e+07	5.4181e+07	5.26e+07	4.7038e+07	4.6978e+07	5.3969e+07	5.2056e+07	5.7436e+07	3.9783e+07	6.1603e+07	6.9943e+07	5.6785e+07	4.4071e+07	3.4097e+07	4.708e+07	4.3964e+07	3.7357e+07	3.4492e+07	4.8872e+07	4.2798e+07	5.3607e+07	6.1084e+07	4.9564e+07	5.4931e+07
ZMO0460	2.5879e+09	2.9318e+09	3.4187e+09	3.2473e+09	3.2777e+09	3.4862e+09	3.3676e+09	3.3263e+09	3.4766e+09	3.9543e+09	4.4886e+09	4.0211e+09	2.6943e+09	3.1187e+09	3.4792e+09	3.1051e+09	3.2226e+09	3.1285e+09	3.218e+09	3.0994e+09	3.4621e+09	4.0688e+09	3.9492e+09	4.0526e+09
ZMO0462	3.5704e+09	3.6576e+09	3.876e+09	2.8085e+09	2.8583e+09	3.105e+09	2.7325e+09	2.5549e+09	3.0664e+09	3.2604e+09	3.4226e+09	3.211e+09	3.3232e+09	4.407e+09	3.6587e+09	2.7547e+09	2.8147e+09	2.7511e+09	2.7567e+09	2.7081e+09	2.8511e+09	3.3379e+09	3.4395e+09	3.3968e+09
ZMO0465	2.2611e+08	2.2343e+08	2.6597e+08	3.1475e+08	2.8624e+08	2.7612e+08	3.2576e+08	2.8172e+08	2.863e+08	2.7731e+08	2.2258e+08	2.8283e+08	2.3803e+08	2.4767e+08	2.6411e+08	2.2527e+08	2.854e+08	2.5581e+08	2.4225e+08	2.899e+08	2.6936e+08	2.0502e+08	2.7116e+08	2.3778e+08
ZMO0467	4.8896e+09	5.1411e+09	4.88679e+09	4.92e+09	4.6599e+09	4.93349e+09	5.08729e+09	6.03149e+09	4.86591e+09	5.6196e+09	5.96621e+09	5.82081e+09	4.2113e+09	5.024e+09	4.3847e+09	4.3755e+09	4.1517e+09	4.33029e+09	4.6702e+09	4.8043e+09	5.1671e+09	5.2504e+09	5.0881e+09	5.2882e+09
ZMO0468	1.3017e+09	1.5014e+09	1.4659e+09	1.3485e+09	1.2426e+09	1.4288e+09	1.2861e+09	1.1379e+09	1.4574e+09	1.2017e+09	1.0557e+09	1.1413e+09	1.2385e+09	1.4809e+09	1.3706e+09	1.234e+09	1.3008e+09	1.185e+09	1.1501e+09	1.1261e+09	1.1298e+09	9.3659e+08	1.1906e+09	9.2379e+08
ZMO0469	4.556e+07	4.0516e+07	3.202e+07	2.6591e+07	3.716e+07	1.9424e+07	2.6397e+07	2.5894e+07	1.6116e+07	3.3658e+07	3.4943e+07	2.6799e+07	3.8609e+07	4.7577e+07	2.9997e+07	3.2693e+07	2.237e+07	3.6978e+07	2.9105e+07	3.5553e+07	3.4276e+07	4.2674e+07	2.729e+07	3.5751e+07
ZMO0471	3.0362e+07	3.5998e+07	2.3876e+07	2.4197e+07	2.1524e+07	2.0754e+07	2.4476e+07	2.745e+07	2.0632e+07	2.9311e+07	2.8773e+07	2.92e+07	3.3485e+07	4.6464e+07	2.6628e+07	2.5952e+07	2.7714e+07	2.5838e+07	2.4169e+07	2.787e+07	2.9879e+07	3.3152e+07	3.047e+07	2.9198e+07
ZMO0472	9.3503e+08	5.3302e+08	6.5165e+08	1.0091e+09	1.063e+09	9.05851e+08	1.0988e+09	1.1608e+09	9.58481e+08	1.0747e+09	1.0405e+09	8.3627e+08	7.9253e+08	6.2701e+08	6.3997e+08	1.1306e+09	1.4152e+09	1.2653e+09	1.2968e+09	1.2671e+09	7.8924e+08	1.2639e+09	1.124e+09	1.5133e+09
ZMO0473	4.8289e+08	4.6585e+08	4.6557e+08	4.5674e+08	3.7328e+08	4.7969e+08	4.2215e+08	4.4567e+08	4.0544e+08	5.1015e+08	3.9868e+08	4.2557e+08	4.0569e+08	2.3494e+08	4.5384e+08	4.9542e+08	5.5928e+08	5.382e+08	4.7871e+08	5.1817e+08	4.2961e+08	4.7756e+08	5.259e+08	4.5184e+08
ZMO0474	2.0796e+09	2.1904e+09	1.7834e+09	2.0629e+09	2.1476e+09	1.7537e+09	2.1711e+09	2.0424e+09	1.8528e+09	1.7509e+09	1.901e+09	2.0354e+09	2.104e+09	2.2302e+09	1.8425e+09	1.8955e+09	1.9158e+09	2.1756e+09	2.0278e+09	2.1806e+09	2.6605e+09	1.9732e+09	1.9303e+09	2.1917e+09
ZMO0475	1.5161e+09	1.7217e+09	1.6372e+09	1.5127e+09	1.5556e+09	1.5608e+09	1.3918e+09	1.4108e+09	1.4442e+09	1.4846e+09	1.3414e+09	1.2092e+09	1.7274e+09	1.9975e+09	1.629e+09	1.5639e+09	1.7308e+09	1.6678e+09	1.5951e+09	1.6219e+09	1.6202e+09	1.7208e+09	1.7687e+09	1.8967e+09
ZMO0476	1.0809e+08	1.3341e+08	1.1398e+08	1.0446e+08	1.0632e+08	1.0521e+08	1.0857e+08	9.98909e+07	1.0282e+08	1.1119e+08	1.0617e+08	1.0785e+08	1.0783e+08	1.1089e+08	1.2452e+08	1.1028e+08	1.16e+08	1.1545e+08	1.0955e+08	1.0293e+08	1.054e+08	1.2885e+08	1.1907e+08	1.0738e+08
ZMO0477	9.6901e+06	4.94439e+06	1.0531e+07	9.1498e+06	8.85889e+06	1.64795e+07	7.1177e+06	8.7856e+06	7.3005e+06	1.1428e+07	6.714e+06	6.1478e+06	7.74778e+06	4.2964e+06	9.2522e+06	1.57979e+07	8.3518e+06	7.7766e+06	6.959e+06	6.5272e+06	3.67911e+06	1.49466e+07	8.89463e+06	1.03292e+07
ZMO0478	2.5519e+09	2.2819e+09	2.2464e+09	2.4539e+09	2.5779e+09	2.5473e+09	2.5547e+09	2.6508e+09	2.5564e+09	2.883e+09	3.2267e+09	2.9884e+09	1.7121e+09	1.8222e+09	2.0042e+09	2.3919e+09	2.3678e+09	2.4792e+09	2.6056e+09	2.6476e+09	2.6928e+09	3.2191e+09	2.9981e+09	3.2539e+09
ZMO0479	1.9362e+08	2.2427e+08	1.8584e+08	1.9205e+08	2.2358e+08	2.0782e+08	2.0393e+08	2.0386e+08	1.8146e+08	1.7274e+08	1.5495e+08	1.5332e+08	1.5112e+08	1.5675e+08	1.4069e+08	1.7965e+08	1.7764e+08	1.6251e+08	1.4184e+08	1.8687e+08	1.4738e+08	1.1855e+08	1.4061e+08	1.0132e+08
ZMO0480	1.14e+08	1.2344e+08	1.2209e+08	1.3394e+08	1.3453e+08	1.3317e+08	1.4265e+08	1.6444e+08	1.3631e+08	1.8821e+08	1.7594e+08	1.492e+08	1.1159e+08	9.44079e+07	1.1327e+08	1.2401e+08	1.2857e+08	1.0942e+08	1.2384e+08	1.333e+08	1.1155e+08	1.9048e+08	1.5382e+08	1.5037e+08
ZMO0481	1.1089e+07	1.63306e+07	1.279e+07	1.229e+07	1.1871e+07	2.49079e+07	9.65771e+06	1.2541e+07	1.0876e+07	8.4153e+06	1.1054e+07	3.24796e+06	9.3865e+06	1.3998e+07	2.47344e+07	1.2253e+07	1.0271e+07	2.73447e+07	7.28451e+06	6.58418e+06	1.19804e+07	3.05718e+07	6.38279e+06	1.3275e+07
ZMO0482	6.0802e+08	5.5062e+08	4.9374e+08	5.5048e+08	5.6513e+08	5.2806e+08	6.0725e+08	4.9946e+08	5.5457e+08	5.2655e+08	5.7315e+08	6.0142e+08	4.9668e+08	4.631e+08	4.6147e+08	4.822e+08	5.3581e+08	5.5393e+08	4.9517e+08	5.7738e+08	6.4267e+08	4.5351e+08	5.746e+08	5.2795e+08
ZMO0483	2.906e+09	2.9939e+09	3.0032e+09	2.8312e+09	2.7721e+09	3.0876e+09	2.7281e+09	2.6003e+09	2.9459e+09	2.885e+09	2.8426e+09	2.7525e+09	2.8933e+09	3.7379e+09	3.3726e+09	3.2313e+09	3.157e+09	3.1941e+09	3.0736e+09	2.97e+09	2.9639e+09	2.9303e+09	3.1893e+09	3.193e+09
ZMO0484	1.0171e+07	1.4912e+07	1.3423e+07	1.1256e+07	1.2012e+07	1.5037e+07	1.3292e+07	1.7706e+07	1.4233e+07	2.2013e+07	2.1213e+07	1.6246e+07	1.6684e+07	1.6363e+07	1.2678e+07	1.8826e+07	1.8712e+07	1.6072e+07	1.932e+07	1.6743e+07	1.6407e+07	2.5145e+07	2.0071e+07	2.6485e+07
ZMO0485	3.2267e+09	3.4792e+09	3.0993e+09	3.9473e+09	4.6729e+09	4.1955e+09	4.3865e+09	4.9231e+09	4.7452e+09	4.6952e+09	5.61061e+09	5.2385e+09	3.4146e+09	3.3812e+09	3.5856e+09	4.4581e+09	4.6492e+09	4.7817e+09	4.76389e+09	4.5863e+09	6.4191e+09	5.95181e+09	5.90459e+09	6.0891e+09
ZMO0486	9.9493e+08	1.0285e+09	1.1383e+09	1.4267e+09	1.229e+09	1.5098e+09	1.4963e+09	1.4936e+09	1.7366e+09	1.4444e+09	1.4306e+09	1.2745e+09	9.844e+08	1.2177e+09	1.2867e+09	1.4933e+09	1.4015e+09	1.4926e+09	1.5157e+09	1.4435e+09	1.4725e+09	1.3237e+09	1.5731e+09	1.3542e+09
ZMO0487	7.4529e+08	6.9614e+08	8.6832e+08	1.2294e+09	1.1597e+09	1.2207e+09	1.2796e+09	1.2695e+09	1.3428e+09	1.2215e+09	1.2319e+09	1.1816e+09	8.14029e+08	9.2971e+08	8.5908e+08	1.1258e+09	1.1422e+09	1.245e+09	1.1832e+09	1.2788e+09	1.1596e+09	1.0495e+09	1.2467e+09	1.1291e+09
ZMO0488	1.6677e+08	2.0065e+08	2.153e+08	2.3399e+08	1.9766e+08	2.1321e+08	2.1774e+08	2.7203e+08	2.1597e+08	2.421e+08	2.4857e+08	2.573e+08	1.9576e+08	1.8248e+08	2.1997e+08	2.3474e+08	2.0355e+08	2.1798e+08	2.3352e+08	2.3714e+08	2.177e+08	2.5047e+08	2.2499e+08	2.3097e+08
ZMO0490	1.2222e+09	1.3495e+09	1.5068e+09	1.9205e+09	1.9627e+09	2.0218e+09	2.0262e+09	1.993e+09	2.09e+09	1.869e+09	1.854e+09	1.939e+09	1.3466e+09	1.298e+09	1.6248e+09	1.9789e+09	1.8706e+09	2.1031e+09	1.9053e+09	1.7813e+09	1.9352e+09	1.654e+09	1.9288e+09	1.7111e+09
ZMO0491	1.3413e+09	1.1924e+09	1.4814e+09	1.5557e+09	1.4986e+09	1.6702e+09	1.5118e+09	1.4342e+09	1.7468e+09	1.4177e+09	1.3844e+09	1.5453e+09	1.1232e+09	1.1754e+09	1.2882e+09	1.3984e+09	1.4083e+09	1.4671e+09	1.3652e+09	1.3449e+09	1.3802e+09	1.0884e+09	1.3908e+09	1.2065e+09
ZMO0492	1.2682e+09	1.278e+09	1.3405e+09	1.601e+09	1.7396e+09	1.6342e+09	1.5856e+09	1.6765e+09	1.7259e+09	1.4249e+09	1.548e+09	1.6801e+09	1.0902e+09	1.0971e+09	1.0611e+09	1.4312e+09	1.3158e+09	1.5069e+09	1.3499e+09	1.4625e+09	1.5582e+09	1.1475e+09	1.4192e+09	1.1796e+09
ZMO0493	1.0037e+10	1.0103e+10	1.106e+10	1.2045e+10	1.2865e+10	1.304e+10	1.2205e+10	1.2403e+10	1.3566e+10	1.1807e+10	1.4111e+10	1.4378e+10	9.35499e+09	1.0144e+10	1.1265e+10	1.2297e+10	1.1728e+10	1.2836e+10	1.286e+10	1.2083e+10	1.524e+10	1.2934e+10	1.3542e+10	1.4918e+10
ZMO0494	2.8929e+07	4.3287e+07	1.8933e+07	2.0644e+07	1.7764e+07	1.3587e+07	1.9605e+07	2.3816e+07	1.345e+07	2.8352e+07	2.7693e+07	2.3661e+07	2.9514e+07	1.4714e+07	1.6573e+07	1.2309e+07	1.5356e+07	2.3537e+07	1.9119e+07	2.0779e+07	2.0421e+07	3.2835e+07	1.7141e+07	3.2623e+07
ZMO0495	1.1758e+08	1.1727e+08	1.0083e+08	1.1395e+08	1.1007e+08	9.6641e+07	1.0874e+08	1.2186e+08	8.5717e+07	1.1942e+08	1.0381e+08	9.8372e+07	9.5656e+07	1.2138e+08	9.3043e+07	1.0268e+08	8.89901e+07	9.4359e+07	1.0524e+08	1.0861e+08	9.8416e+07	9.57119e+07	9.3283e+07	9.4466e+07
ZMO0496	6.5644e+07	1.7417e+08	6.8671e+07	5.8566e+07	2.766e+07	3.817e+07	8.32749e+06	3.9162e+07	2.491e+07	4.89338e+06	8.8038e+07	2.5155e+07	5.531e+07	3.8829e+07	6.229e+07	8.19991e+06	1.9685e+07	4.7643e+07	1.4043e+07	2.8189e+07	1.12677e+07	5.50919e+06	2.5992e+08	4.115e+07
ZMO0497	3.2787e+08	3.1613e+08	2.9911e+08	3.0294e+08	2.9861e+08	2.9031e+08	2.7997e+08	2.4969e+08	2.2731e+08	2.3401e+08	2.1584e+08	2.3236e+08	2.8775e+08	1.9353e+08	3.2373e+08	3.107e+08	2.8851e+08	2.8498e+08	2.6219e+08	2.3326e+08	2.9291e+08	2.4255e+08	2.628e+08	2.1133e+08
ZMO0498	1.0531e+09	1.1765e+09	1.3595e+09	1.566e+09	1.5408e+09	1.605e+09	1.6732e+09	1.8027e+09	1.6628e+09	1.9513e+09	2.1279e+09	1.956e+09	1.3411e+09	1.3663e+09	1.5554e+09	1.7655e+09	1.6577e+09	1.783e+09	1.8982e+09	1.8327e+09	1.8599e+09	2.1062e+09	1.9627e+09	2.1691e+09
ZMO0499	8.0746e+08	8.1377e+08	8.89339e+08	7.4436e+08	6.6713e+08	6.7604e+08	7.0091e+08	8.4509e+08	6.431e+08	8.8106e+08	7.97001e+08	8.5676e+08	7.0934e+08	9.6055e+08	7.6572e+08	6.9068e+08	6.8519e+08	6.9493e+08	7.6994e+08	7.6548e+08	7.5878e+08	7.9686e+08	8.1687e+08	7.7354e+08
ZMO0500	4.0549e+07	4.7505e+07	4.3427e+07	3.5373e+07	2.8949e+07	4.0634e+07	4.4878e+07	4.6383e+07	3.3632e+07	4.8273e+07	4.5972e+07	3.4634e+07	3.4457e+07	4.9282e+07	2.8197e+07	4.3711e+07	3.96e+07	3.5306e+07	3.6784e+07	3.6776e+07	3.8344e+07	4.1107e+07	4.2099e+07	3.5809e+07
ZMO0502	1.0886e+07	1.0505e+07	1.2863e+07	1.7054e+07	9.90931e+06	7.9106e+06	1.6473e+07	1.4113e+07	1.0223e+07	9.7645e+06	2.24455e+06	9.5554e+06	1.0968e+07	8.67752e+06	1.0526e+07	1.0684e+07	1.0063e+07	1.4434e+07	1.3209e+07	1.513e+07	2.23745e+07	5.41344e+06	5.23674e+06	9.4909e+06
ZMO0503	2.9251e+08	3.1701e+08	3.3611e+08	2.2393e+08	2.1044e+08	2.5891e+08	2.3013e+08	2.692e+08	2.5343e+08	3.6304e+08	3.0321e+08	2.8598e+08	2.7715e+08	3.3261e+08	2.6505e+08	2.2576e+08	2.2671e+08	2.353e+08	2.3052e+08	2.2911e+08	2.0068e+08	2.836e+08	2.6377e+08	2.7833e+08
ZMO0505	1.4344e+08	1.2367e+08	1.1547e+08	1.1746e+08	9.5583e+07	9.2752e+07	1.0054e+08	8.3385e+07	8.2641e+07	1.0539e+08	8.5979e+07	1.0291e+08	1.1092e+08	1.328e+08	9.3496e+07	7.5538e+07	8.7652e+07	7.5438e+07	7.475e+07	9.2505e+07	7.1229e+07	8.5358e+07	9.114e+07	7.6404e+07
ZMO0506	1.2231e+07	2.81512e+07	1.15884e+07	7.30746e+06	6.57896e+06	3.00632e+07	5.41355e+06	1.80539e+07	8.25181e+06	1.131e+07	4.26879e+06	1.44867e+07	2.76516e+07	2.3158e+07	1.06586e+07	8.19618e+06	1.68775e+07	4.96353e+06	1.81675e+07	5.66655e+06	9.90699e+06	4.579e+06	1.99738e+07	8.81482e+06
ZMO0507	3.4259e+07	3.91e+07	5.6451e+07	6.9563e+07	7.2408e+07	6.3047e+07	5.7837e+07	4.7951e+07	7.0782e+07	6.808e+07	6.6085e+07	5.6272e+07	5.1455e+07	5.1093e+07	4.7714e+07	6.3128e+07	6.5808e+07	6.0371e+07	5.7626e+07	6.466e+07	5.3037e+07	7.3502e+07	5.9475e+07	6.4924e+07
ZMO0508	2.7583e+08	3.0425e+08	3.7205e+08	3.3565e+08	2.6845e+08	3.7649e+08	2.9753e+08	1.91e+08	3.1249e+08	3.4861e+08	2.1436e+08	3.1604e+08	2.198e+08	2.9497e+08	2.3455e+08	1.4842e+08	2.5747e+08	1.5822e+08	1.5483e+08	2.3539e+08	1.313e+08	1.6956e+08	2.3857e+08	1.731e+08
ZMO0509	7.2232e+07	6.9455e+07	1.2277e+08	1.3769e+08	1.1261e+08	1.3218e+08	1.1282e+08	1.0569e+08	1.0825e+08	4.0224e+07	2.7772e+07	3.8422e+07	1.1921e+08	1.4922e+08	1.3454e+08	1.2775e+08	1.4486e+08	1.2473e+08	1.0848e+08	1.3238e+08	7.8211e+07	3.6263e+07	5.6532e+07	2.9469e+07
ZMO0510	2.1139e+09	2.32e+09	2.3464e+09	2.1391e+09	2.1541e+09	2.2477e+09	2.2365e+09	2.8223e+09	2.3881e+09	3.0169e+09	3.3692e+09	2.9943e+09	1.9987e+09	2.2575e+09	2.4692e+09	2.4765e+09	2.2329e+09	2.3512e+09	2.6624e+09	2.3934e+09	2.8284e+09	3.2519e+09	3.1131e+09	3.1467e+09
ZMO0511	9.42131e+08	9.06631e+08	8.9731e+08	9.8063e+08	9.31559e+08	9.5176e+08	1.3494e+09	1.4116e+09	1.0424e+09	1.4573e+09	1.5097e+09	1.3356e+09	7.9918e+08	1.074e+09	8.71459e+08	1.1996e+09	1.2314e+09	1.2821e+09	1.5458e+09	1.2853e+09	1.2762e+09	1.5882e+09	1.3443e+09	1.7122e+09
ZMO0512	1.4217e+09	1.6015e+09	1.8091e+09	1.7649e+09	1.8922e+09	1.8821e+09	2.0018e+09	2.2723e+09	2.1838e+09	2.5697e+09	2.885e+09	2.5771e+09	1.8027e+09	2.0731e+09	1.6835e+09	1.8363e+09	1.8377e+09	2.0139e+09	2.3638e+09	2.1485e+09	2.5419e+09	2.699e+09	2.5812e+09	2.9669e+09
ZMO0513	2.6162e+07	3.5505e+07	3.011e+07	2.2231e+07	2.0917e+07	1.758e+07	2.2803e+07	2.6057e+07	2.1573e+07	3.8946e+07	4.4594e+07	3.8388e+07	2.5097e+07	4.4594e+07	2.2087e+07	1.7591e+07	1.9073e+07	1.9605e+07	2.0984e+07	2.2988e+07	2.0603e+07	3.3568e+07	3.6055e+07	3.5252e+07
ZMO0514	1.4145e+10	1.4506e+10	1.3345e+10	1.054e+10	1.1723e+10	1.0574e+10	1.0049e+10	1.0687e+10	1.1007e+10	1.049e+10	1.1362e+10	1.1611e+10	1.3694e+10	1.4185e+10	1.4042e+10	1.065e+10	1.0108e+10	1.0984e+10	1.0791e+10	1.0558e+10	1.2118e+10	1.1712e+10	1.1657e+10	1.2788e+10
ZMO0515	2.9533e+10	3.1813e+10	3.0505e+10	2.1938e+10	2.3715e+10	2.4773e+10	2.0127e+10	2.0472e+10	2.3737e+10	1.9414e+10	2.1274e+10	2.1675e+10	2.5745e+10	3.2351e+10	2.8914e+10	2.2261e+10	2.1607e+10	2.154e+10	1.9201e+10	2.0164e+10	2.1907e+10	2.0137e+10	2.181e+10	2.1257e+10
ZMO0516	4.63719e+10	4.66281e+10	4.6137e+10	4.53449e+10	4.58159e+10	4.6533e+10	4.74179e+10	4.617e+10	4.6455e+10	4.6922e+10	5.32e+10	5.4807e+10	4.2924e+10	4.3374e+10	4.9634e+10	4.8344e+10	4.61501e+10	4.93601e+10	4.75081e+10	4.8149e+10	5.67619e+10	4.8765e+10	5.2966e+10	5.3824e+10
ZMO0517	1.2287e+10	1.4549e+10	1.2359e+10	9.60669e+09	1.0577e+10	1.0098e+10	9.4394e+09	1.0219e+10	9.70591e+09	1.0098e+10	1.1495e+10	1.183e+10	1.2578e+10	1.5496e+10	1.3915e+10	1.0456e+10	9.88239e+09	1.0414e+10	1.0232e+10	1.0719e+10	1.1462e+10	1.1584e+10	1.1904e+10	1.15e+10
ZMO0518	1.4733e+10	1.5966e+10	1.4156e+10	1.1142e+10	1.0984e+10	1.1295e+10	1.0979e+10	1.2007e+10	1.1595e+10	1.256e+10	1.3402e+10	1.2925e+10	1.3567e+10	1.935e+10	1.5593e+10	1.2148e+10	1.1915e+10	1.1936e+10	1.2432e+10	1.2351e+10	1.3921e+10	1.327e+10	1.3496e+10	1.3882e+10
ZMO0519	4.7188e+09	5.91721e+09	5.586e+09	4.3877e+09	4.3553e+09	5.0595e+09	4.37499e+09	4.7729e+09	4.5409e+09	4.62441e+09	5.2075e+09	4.5957e+09	5.2755e+09	7.12431e+09	6.4164e+09	5.1042e+09	4.5172e+09	4.8649e+09	4.9667e+09	4.6331e+09	5.1881e+09	4.8951e+09	4.7961e+09	4.7072e+09
ZMO0520	1.3055e+10	1.2635e+10	1.3002e+10	1.0228e+10	1.1529e+10	1.0551e+10	1.047e+10	1.1472e+10	9.75309e+09	9.92739e+09	1.1335e+10	1.2081e+10	1.1181e+10	1.5048e+10	1.3111e+10	1.0568e+10	1.0485e+10	1.144e+10	1.0795e+10	1.1456e+10	1.269e+10	1.0489e+10	1.1222e+10	1.2058e+10
ZMO0521	7.1957e+09	9.03559e+09	8.4648e+09	6.858e+09	7.13381e+09	7.3291e+09	7.30851e+09	7.33049e+09	7.4669e+09	7.31251e+09	8.50361e+09	7.78169e+09	8.41659e+09	1.0179e+10	8.9004e+09	7.40221e+09	7.03511e+09	7.14421e+09	7.41361e+09	7.1208e+09	8.36251e+09	7.68561e+09	8.178e+09	7.79391e+09
ZMO0522	1.0752e+10	1.2401e+10	1.1977e+10	8.5133e+09	8.7866e+09	8.9268e+09	8.3457e+09	9.14369e+09	9.2515e+09	9.1216e+09	1.097e+10	1.0403e+10	1.1308e+10	1.3745e+10	1.2568e+10	9.38829e+09	8.82861e+09	9.41131e+09	9.29119e+09	9.3366e+09	1.1095e+10	1.0036e+10	9.97631e+09	1.0834e+10
ZMO0523	5.5926e+09	6.3635e+09	6.20681e+09	5.18189e+09	5.206e+09	5.6846e+09	5.54501e+09	5.73571e+09	5.7287e+09	6.05069e+09	6.6289e+09	6.0883e+09	5.2512e+09	5.6268e+09	6.9077e+09	5.677e+09	5.478e+09	5.2215e+09	5.8971e+09	5.68709e+09	6.7265e+09	5.67981e+09	6.80739e+09	6.2857e+09
ZMO0524	6.7263e+08	5.6684e+08	6.4226e+08	6.6681e+08	1.3056e+09	7.2959e+08	8.6455e+08	9.65661e+08	1.0711e+09	4.0206e+08	1.117e+09	1.0335e+09	6.9062e+08	5.5714e+08	7.1868e+08	7.228e+08	9.2235e+08	5.6239e+08	8.2367e+08	1.2885e+09	9.9108e+08	6.6296e+08	6.2705e+08	7.8778e+08
ZMO0525	4.8325e+09	5.1004e+09	6.28379e+09	4.8287e+09	3.9523e+09	5.3939e+09	5.2168e+09	5.3073e+09	5.206e+09	5.3882e+09	6.05759e+09	5.47979e+09	5.0066e+09	8.3726e+09	6.1612e+09	5.59831e+09	4.90771e+09	5.143e+09	5.4904e+09	5.38171e+09	5.15101e+09	5.6026e+09	6.1932e+09	6.8339e+09
ZMO0526	7.26151e+09	7.52979e+09	7.32499e+09	5.0642e+09	4.9808e+09	5.4321e+09	4.7793e+09	5.35831e+09	5.6516e+09	5.3832e+09	5.8671e+09	5.6124e+09	6.2643e+09	7.8303e+09	7.0276e+09	5.46981e+09	5.3062e+09	5.0196e+09	5.6116e+09	5.2532e+09	5.90961e+09	5.4183e+09	6.1425e+09	6.21329e+09
ZMO0527	9.0347e+09	7.7619e+09	8.76469e+09	6.91159e+09	6.9069e+09	6.3895e+09	6.65469e+09	7.2391e+09	6.4677e+09	6.59141e+09	6.5526e+09	7.2332e+09	9.40539e+09	1.4542e+10	8.1204e+09	6.7418e+09	6.56261e+09	7.0167e+09	6.72021e+09	7.52311e+09	8.0497e+09	6.75211e+09	6.5859e+09	8.0736e+09
ZMO0528	1.4047e+10	1.3747e+10	1.1801e+10	1.0105e+10	1.0693e+10	1.0317e+10	1.0048e+10	1.0803e+10	1.0036e+10	9.5196e+09	1.1043e+10	1.0933e+10	1.1193e+10	1.1974e+10	1.1792e+10	1.076e+10	1.0272e+10	1.0597e+10	9.8271e+09	1.1248e+10	1.0972e+10	1.0973e+10	9.46899e+09	1.2291e+10
ZMO0529	1.8944e+09	1.2847e+09	1.5461e+09	1.0927e+09	1.2625e+09	1.074e+09	1.2155e+09	1.3725e+09	1.1693e+09	9.6344e+08	1.2938e+09	1.6824e+09	9.4439e+08	2.6197e+09	1.5944e+09	1.3648e+09	1.244e+09	1.2981e+09	1.2134e+09	1.2583e+09	1.8303e+09	1.0148e+09	9.27809e+08	1.4476e+09
ZMO0530	8.41679e+09	8.4518e+09	7.8038e+09	6.42949e+09	6.2803e+09	6.71831e+09	6.1585e+09	6.5132e+09	6.5137e+09	6.7849e+09	7.29681e+09	7.16161e+09	7.8916e+09	9.4141e+09	8.613e+09	6.94719e+09	6.7831e+09	6.96389e+09	6.60999e+09	6.93779e+09	7.3854e+09	7.415e+09	7.67521e+09	7.91821e+09
ZMO0531	9.1696e+09	8.59871e+09	1.0742e+10	8.96211e+09	9.1305e+09	8.82551e+09	9.0078e+09	9.07961e+09	9.6936e+09	8.38449e+09	9.6576e+09	9.69521e+09	9.01271e+09	9.83019e+09	1.0865e+10	9.1142e+09	8.04459e+09	8.6324e+09	8.9423e+09	8.7089e+09	1.0698e+10	8.9627e+09	9.81829e+09	9.52771e+09
ZMO0532	7.2126e+09	7.49321e+09	6.97781e+09	5.4647e+09	5.95999e+09	5.7088e+09	5.6386e+09	5.6584e+09	5.0837e+09	5.3809e+09	5.5643e+09	5.4309e+09	6.9643e+09	9.2198e+09	6.43271e+09	5.9424e+09	6.27541e+09	5.91179e+09	6.05001e+09	5.7381e+09	6.2228e+09	6.1302e+09	5.644e+09	6.83569e+09
ZMO0533	1.4484e+10	1.5553e+10	1.5423e+10	1.1556e+10	1.1587e+10	1.1981e+10	1.1537e+10	1.2814e+10	1.2456e+10	1.2344e+10	1.4355e+10	1.4987e+10	1.5172e+10	2.0049e+10	1.6179e+10	1.2489e+10	1.3097e+10	1.268e+10	1.2581e+10	1.309e+10	1.4663e+10	1.3589e+10	1.4533e+10	1.5142e+10
ZMO0534	1.0463e+09	7.2248e+08	1.0142e+09	8.5524e+08	9.3904e+08	9.4613e+08	7.9748e+08	1.0772e+09	1.0057e+09	8.7095e+08	1.1116e+09	1.0133e+09	9.6309e+08	1.138e+09	9.0807e+08	9.9102e+08	1.0694e+09	8.7465e+08	1.0012e+09	1.1185e+09	9.91179e+08	9.32509e+08	9.2129e+08	1.0261e+09
ZMO0536	5.3119e+09	5.74661e+09	5.56921e+09	4.1891e+09	4.2122e+09	4.61889e+09	4.4272e+09	4.5271e+09	4.5029e+09	4.1169e+09	4.6715e+09	4.3306e+09	4.8152e+09	7.71711e+09	5.92131e+09	4.8855e+09	4.2868e+09	4.3866e+09	4.69829e+09	4.249e+09	4.8531e+09	4.3147e+09	4.7458e+09	4.5339e+09
ZMO0537	3.5372e+08	3.1183e+08	3.0286e+08	2.2128e+08	1.9222e+08	2.2452e+08	2.1525e+08	2.5563e+08	2.2156e+08	2.8085e+08	2.8062e+08	2.4666e+08	2.5827e+08	2.8281e+08	2.7087e+08	2.172e+08	2.1365e+08	2.2789e+08	2.224e+08	1.9865e+08	1.9383e+08	2.6188e+08	2.2815e+08	2.5286e+08
ZMO0538	2.2402e+09	2.2491e+09	2.1495e+09	1.682e+09	1.3445e+09	1.7167e+09	1.4606e+09	1.3117e+09	1.5191e+09	1.5507e+09	1.4024e+09	1.4281e+09	1.9492e+09	3.4958e+09	2.2444e+09	1.7216e+09	1.6889e+09	1.5341e+09	1.3566e+09	1.3156e+09	1.3977e+09	1.2242e+09	1.5122e+09	1.2262e+09
ZMO0539	7.96659e+09	8.16771e+09	8.64851e+09	6.84439e+09	6.7413e+09	7.16079e+09	6.8701e+09	7.07131e+09	6.7814e+09	7.0403e+09	7.9045e+09	7.2068e+09	7.9849e+09	8.49141e+09	8.95209e+09	7.57591e+09	7.2104e+09	7.03109e+09	7.375e+09	7.68701e+09	8.31691e+09	7.44341e+09	7.50221e+09	7.96539e+09
ZMO0540	6.9544e+09	7.25009e+09	6.2049e+09	4.4235e+09	5.4497e+09	4.5274e+09	4.63261e+09	4.9704e+09	4.349e+09	4.7742e+09	5.4772e+09	5.3846e+09	5.9259e+09	7.92669e+09	6.1749e+09	4.7846e+09	4.9112e+09	5.1561e+09	4.9392e+09	5.0394e+09	5.7045e+09	5.1157e+09	5.0211e+09	5.92731e+09
ZMO0541	7.34421e+09	7.6518e+09	7.82331e+09	5.81179e+09	6.3292e+09	6.54921e+09	5.9166e+09	6.81271e+09	6.90169e+09	6.982e+09	7.6252e+09	7.01779e+09	6.96039e+09	7.5986e+09	7.6964e+09	5.91161e+09	5.3646e+09	5.5197e+09	6.16931e+09	6.02639e+09	6.5074e+09	7.38389e+09	6.7061e+09	7.09851e+09
ZMO0542	1.0738e+10	1.1809e+10	9.718e+09	7.1544e+09	7.4571e+09	8.27011e+09	7.371e+09	8.0513e+09	7.97041e+09	8.4533e+09	8.8901e+09	8.87831e+09	9.48779e+09	1.1452e+10	1.0006e+10	8.4801e+09	7.54171e+09	8.1081e+09	7.98361e+09	7.78211e+09	8.7784e+09	9.38921e+09	8.74481e+09	9.8496e+09
ZMO0543	3.203e+09	3.6155e+09	3.3243e+09	3.8442e+09	4.1369e+09	4.0376e+09	3.6709e+09	3.3929e+09	3.8769e+09	3.1541e+09	3.2164e+09	3.5659e+09	3.928e+09	4.3882e+09	4.102e+09	4.1019e+09	4.7427e+09	4.6827e+09	3.9677e+09	4.2863e+09	4.4558e+09	3.3728e+09	4.3155e+09	3.5368e+09
ZMO0544	3.1095e+09	3.0082e+09	3.025e+09	3.8175e+09	3.5911e+09	3.862e+09	3.5656e+09	3.4856e+09	3.7943e+09	3.3896e+09	3.4696e+09	3.5638e+09	3.4499e+09	3.8458e+09	3.6823e+09	4.448e+09	4.5133e+09	4.5119e+09	4.0571e+09	4.3055e+09	4.2729e+09	3.5498e+09	4.65891e+09	3.7334e+09
ZMO0545	3.3993e+08	3.2506e+08	2.6598e+08	2.7044e+08	3.1398e+08	2.7742e+08	2.5825e+08	2.1197e+08	2.6994e+08	2.1144e+08	2.222e+08	2.5839e+08	3.2471e+08	3.6728e+08	2.8725e+08	2.297e+08	2.7029e+08	2.7623e+08	2.1889e+08	2.6032e+08	2.9313e+08	2.4313e+08	2.7727e+08	2.4584e+08
ZMO0546	6.0614e+07	7.0629e+07	4.7693e+07	3.8495e+07	4.6731e+07	3.5634e+07	3.6407e+07	4.5819e+07	3.2808e+07	4.9316e+07	5.9423e+07	4.5256e+07	6.4551e+07	5.4867e+07	4.9763e+07	3.4031e+07	3.4897e+07	4.5319e+07	3.7125e+07	4.654e+07	4.8072e+07	4.779e+07	4.3664e+07	5.2775e+07
ZMO0547	2.6324e+07	4.6846e+07	3.7751e+07	3.1745e+07	3.013e+07	3.4438e+07	3.124e+07	3.8938e+07	2.9465e+07	3.5911e+07	4.0889e+07	4.2071e+07	4.3466e+07	7.4211e+07	5.4825e+07	3.3565e+07	3.0545e+07	3.8834e+07	3.4571e+07	3.0126e+07	3.8657e+07	4.5011e+07	3.5611e+07	3.6785e+07
ZMO0548	7.6118e+07	7.8019e+07	6.3844e+07	5.6147e+07	6.2888e+07	4.827e+07	5.651e+07	5.9392e+07	4.892e+07	6.6426e+07	6.8224e+07	5.803e+07	5.8412e+07	8.2518e+07	5.6505e+07	4.843e+07	4.7512e+07	5.019e+07	4.8994e+07	4.6894e+07	5.2808e+07	6.6265e+07	5.6674e+07	5.9126e+07
ZMO0549	1.3633e+10	1.332e+10	1.5251e+10	1.4133e+10	1.2983e+10	1.4074e+10	1.3657e+10	1.2362e+10	1.3806e+10	1.3466e+10	1.36e+10	1.4487e+10	1.3259e+10	1.7068e+10	1.4039e+10	1.3982e+10	1.4493e+10	1.4239e+10	1.4016e+10	1.4323e+10	1.4522e+10	1.391e+10	1.5883e+10	1.5716e+10
ZMO0550	3.0392e+09	2.6724e+09	2.8828e+09	2.4239e+09	3.1492e+09	2.8964e+09	2.612e+09	3.3531e+09	3.6003e+09	2.5584e+09	4.1283e+09	3.0993e+09	2.6731e+09	2.9689e+09	2.9519e+09	3.1158e+09	3.1465e+09	2.4035e+09	3.1163e+09	3.855e+09	3.0174e+09	3.1443e+09	3.191e+09	3.5688e+09
ZMO0551	1.0906e+08	1.0244e+08	1.1188e+08	7.4189e+07	7.6032e+07	7.8224e+07	7.2669e+07	6.8972e+07	7.5155e+07	6.9987e+07	9.0206e+07	6.9506e+07	9.2085e+07	1.0612e+08	8.2695e+07	5.7493e+07	6.4503e+07	5.4516e+07	6.5433e+07	5.6414e+07	5.5307e+07	8.94699e+07	6.8265e+07	7.3254e+07
ZMO0552	2.2722e+07	2.6187e+07	2.4816e+07	1.6205e+07	1.4035e+07	1.8602e+07	1.9555e+07	1.5337e+07	1.3124e+07	1.9795e+07	2.3762e+07	2.1507e+07	2.7892e+07	4.0679e+07	2.4507e+07	1.6581e+07	1.1945e+07	1.6607e+07	1.8118e+07	1.6082e+07	1.548e+07	2.5438e+07	2.1096e+07	2.2434e+07
ZMO0553	4.1149e+08	4.6653e+08	4.0042e+08	3.3527e+08	3.4646e+08	2.8799e+08	3.0473e+08	2.4186e+08	2.9314e+08	2.5662e+08	2.3355e+08	2.7428e+08	4.0207e+08	5.1165e+08	3.309e+08	2.6784e+08	3.4848e+08	3.0256e+08	2.2397e+08	3.2033e+08	2.8228e+08	2.3774e+08	2.9456e+08	2.3998e+08
ZMO0554	1.312e+10	1.3946e+10	1.3987e+10	1.1657e+10	1.2048e+10	1.2296e+10	1.1013e+10	1.147e+10	1.1637e+10	1.09e+10	1.2126e+10	1.2228e+10	1.2222e+10	1.6155e+10	1.4212e+10	1.233e+10	1.2007e+10	1.2736e+10	1.1858e+10	1.1836e+10	1.3512e+10	1.2162e+10	1.2872e+10	1.3336e+10
ZMO0555	3.5617e+08	3.7845e+08	2.7058e+08	2.6602e+08	2.6194e+08	2.3657e+08	2.2693e+08	2.0807e+08	2.4897e+08	2.3438e+08	2.3773e+08	2.2358e+08	3.338e+08	2.9495e+08	2.8218e+08	2.5728e+08	2.5457e+08	2.8413e+08	2.5634e+08	2.6361e+08	2.8894e+08	2.6181e+08	2.7438e+08	2.5675e+08
ZMO0556	5.82479e+09	6.1484e+09	6.53271e+09	5.24341e+09	5.4406e+09	5.5894e+09	5.118e+09	5.32549e+09	5.7661e+09	5.1288e+09	5.463e+09	5.59669e+09	5.5539e+09	6.39601e+09	6.1058e+09	5.18161e+09	5.1749e+09	5.2557e+09	5.0585e+09	5.6444e+09	5.5536e+09	4.65241e+09	5.6575e+09	5.0659e+09
ZMO0557	7.386e+08	6.9423e+08	6.571e+08	5.2442e+08	5.1668e+08	4.7604e+08	4.479e+08	3.7471e+08	4.5053e+08	4.6137e+08	4.3652e+08	4.7718e+08	6.6096e+08	6.6476e+08	5.9201e+08	4.6975e+08	4.9706e+08	4.529e+08	4.2869e+08	4.7952e+08	4.2751e+08	4.6327e+08	4.9061e+08	5.2211e+08
ZMO0558	5.2658e+08	5.1234e+08	4.6873e+08	6.0203e+08	5.9421e+08	5.3584e+08	6.3624e+08	7.233e+08	5.8002e+08	7.0936e+08	6.8322e+08	6.4815e+08	5.1207e+08	5.4666e+08	5.3559e+08	5.7319e+08	5.8379e+08	5.7068e+08	6.2552e+08	6.1058e+08	6.2895e+08	6.3514e+08	6.1382e+08	6.3683e+08
ZMO0559	9.69649e+08	9.2044e+08	9.2021e+08	1.1217e+09	1.0755e+09	1.0396e+09	1.1582e+09	1.2181e+09	1.033e+09	1.3599e+09	1.3231e+09	1.3497e+09	9.0629e+08	1.1054e+09	9.3273e+08	1.0602e+09	1.0425e+09	1.1574e+09	1.1718e+09	1.2627e+09	1.2441e+09	1.2913e+09	1.2146e+09	1.2895e+09
ZMO0561	1.3543e+08	7.8399e+07	1.1183e+08	6.59716e+06	4.51277e+06	5.9366e+07	6.7516e+07	7.0208e+07	6.4153e+07	9.3018e+07	1.60864e+07	9.3917e+06	1.0709e+07	1.07121e+07	2.90638e+06	2.59829e+06	1.20578e+07	1.33895e+07	9.03084e+06	6.1305e+07	6.62339e+06	1.27118e+07	2.88973e+06	1.11025e+07
ZMO0562	6.8e+07	6.5965e+07	5.5091e+07	2.7491e+07	4.1002e+07	4.8954e+07	1.9516e+07	3.9618e+07	3.6857e+07	1.5977e+07	1.7734e+07	1.9035e+07	2.5154e+07	1.9369e+07	2.1749e+07	2.4683e+07	1.4926e+07	1.4341e+07	1.98e+07	1.5964e+07	1.1845e+07	1.27779e+07	1.11808e+07	1.10468e+07
ZMO0563	7.7266e+08	6.5542e+08	7.8534e+08	8.9908e+08	1.0354e+09	8.066e+08	8.8007e+08	8.3708e+08	9.9148e+08	6.1033e+08	8.1089e+08	8.6622e+08	7.036e+08	5.0552e+08	7.5769e+08	8.9963e+08	9.0636e+08	7.4527e+08	7.83849e+08	8.6681e+08	6.8766e+08	5.4236e+08	6.9327e+08	6.7103e+08
ZMO0564	3.0795e+08	2.8886e+08	2.9309e+08	2.8285e+08	2.279e+08	2.661e+08	2.3891e+08	2.1204e+08	2.3673e+08	2.5476e+08	2.1012e+08	2.0441e+08	2.6357e+08	2.8853e+08	2.5449e+08	2.3714e+08	2.5875e+08	2.2616e+08	2.2298e+08	2.1106e+08	1.886e+08	2.5255e+08	2.5708e+08	2.27e+08
ZMO0565	2.4503e+08	2.6318e+08	2.7018e+08	2.1849e+08	2.0363e+08	2.1201e+08	1.8937e+08	2.0111e+08	2.0503e+08	2.3552e+08	2.2028e+08	2.0912e+08	2.5796e+08	2.4256e+08	2.225e+08	2.1461e+08	2.0728e+08	2.0301e+08	2.1431e+08	1.7843e+08	1.8298e+08	2.4043e+08	2.1338e+08	2.3071e+08
ZMO0566	7.12889e+06	6.03085e+06	2.3738e+06	8.35719e+06	1.1367e+06	9.83671e+06	1.1858e+06	1.3475e+06	6.50058e+06	9.22085e+06	8.75933e+06	1.2301e+06	1.08917e+07	1.04608e+07	2.6211e+06	2.64805e+07	7.46616e+06	7.84791e+06	1.30751e+07	1.0216e+06	1.1156e+06	3.63375e+07	1.06429e+07	1.1467e+06
ZMO0567	1.57e+09	1.7158e+09	1.6651e+09	1.5579e+09	1.9115e+09	1.6878e+09	1.5737e+09	1.6545e+09	1.7005e+09	1.5283e+09	1.6971e+09	1.7794e+09	1.3024e+09	1.7252e+09	1.399e+09	1.6103e+09	1.5508e+09	1.6243e+09	1.5741e+09	1.4834e+09	1.9649e+09	1.8338e+09	1.7116e+09	1.7892e+09
ZMO0568	1.14009e+07	6.9731e+06	2.03338e+07	1.0586e+07	1.1467e+07	9.9472e+06	2.95337e+06	9.03391e+06	9.70189e+06	6.7843e+06	7.2201e+06	1.0218e+07	8.2259e+06	1.3468e+07	7.8462e+06	6.6832e+06	8.5676e+06	7.0664e+06	7.2504e+06	8.751e+06	7.9253e+06	6.6591e+06	9.15984e+06	6.1136e+06
ZMO0569	1.0562e+07	7.1944e+06	7.9533e+06	6.733e+06	8.0191e+06	4.6979e+06	7.2104e+06	8.4549e+06	5.0777e+06	8.0689e+06	6.4331e+06	9.3095e+06	9.4196e+06	1.6111e+07	5.4519e+06	4.7455e+06	6.2943e+06	5.992e+06	6.118e+06	7.8814e+06	7.4483e+06	7.6922e+06	5.1966e+06	6.827e+06
ZMO0570	5.9579e+08	5.1405e+08	5.488e+08	5.4091e+08	5.6737e+08	5.3622e+08	5.3578e+08	5.6515e+08	4.9091e+08	6.438e+08	5.3665e+08	5.9171e+08	5.3552e+08	5.8221e+08	5.279e+08	5.5277e+08	5.0478e+08	5.0477e+08	5.2766e+08	5.6195e+08	5.5121e+08	5.3885e+08	5.2101e+08	5.0321e+08
ZMO0571	8.6446e+07	1.2552e+08	1.0303e+08	1.0198e+08	8.94901e+07	9.7159e+07	9.9045e+07	1.3546e+08	9.34681e+07	1.0502e+08	1.4921e+08	9.6541e+07	9.3987e+07	1.1558e+08	1.0586e+08	7.1171e+07	7.4066e+07	8.2792e+07	9.3617e+07	8.1639e+07	8.1076e+07	1.2122e+08	8.9453e+07	1.0027e+08
ZMO0572	4.5636e+08	4.5303e+08	4.4616e+08	4.1983e+08	4.8801e+08	4.428e+08	5.1904e+08	6.7334e+08	4.8223e+08	6.0703e+08	7.1119e+08	5.89e+08	3.6063e+08	3.8607e+08	4.1532e+08	4.1636e+08	3.5478e+08	3.8767e+08	4.7549e+08	4.5372e+08	5.1448e+08	5.9197e+08	4.7618e+08	5.0881e+08
ZMO0573	5.5242e+08	4.7724e+08	5.1788e+08	6.6953e+08	6.3305e+08	6.8849e+08	6.7015e+08	6.6602e+08	6.2637e+08	7.5844e+08	9.1891e+08	7.1209e+08	3.14e+08	3.0966e+08	3.3783e+08	5.7635e+08	6.3327e+08	5.8897e+08	6.2392e+08	6.5501e+08	6.7989e+08	8.40921e+08	6.8239e+08	7.28e+08
ZMO0574	5.3021e+08	5.5332e+08	5.4064e+08	4.9256e+08	4.7671e+08	4.8666e+08	5.0625e+08	5.3702e+08	4.5194e+08	6.4362e+08	6.4351e+08	5.59e+08	5.9255e+08	5.8242e+08	6.2147e+08	5.7974e+08	5.0241e+08	5.9221e+08	6.2324e+08	5.4661e+08	6.4775e+08	7.6312e+08	6.6885e+08	6.8494e+08
ZMO0575	2.7231e+08	2.8375e+08	2.7706e+08	2.4808e+08	2.5129e+08	2.389e+08	2.1719e+08	2.0101e+08	2.2261e+08	1.8559e+08	1.7345e+08	2.025e+08	2.7055e+08	3.0968e+08	2.5127e+08	2.1848e+08	2.1596e+08	2.4585e+08	2.026e+08	2.1236e+08	2.0469e+08	1.9443e+08	2.1659e+08	2.0609e+08
ZMO0576	4.5797e+08	4.8726e+08	5.128e+08	3.9998e+08	3.9705e+08	3.9293e+08	4.1297e+08	3.9467e+08	3.894e+08	4.0073e+08	4.3777e+08	4.7407e+08	4.7804e+08	7.6061e+08	4.4017e+08	3.6824e+08	3.7627e+08	4.0168e+08	3.6939e+08	3.838e+08	4.0918e+08	4.6044e+08	4.2994e+08	4.504e+08
ZMO0578	1.1704e+08	1.4296e+08	1.3993e+08	9.5194e+07	8.6899e+07	9.9039e+07	8.7836e+07	1.2699e+08	9.3421e+07	1.0935e+08	1.2399e+08	1.0363e+08	1.5744e+08	1.4779e+08	1.2412e+08	9.5647e+07	9.2445e+07	1.2624e+08	9.9902e+07	9.1895e+07	1.1846e+08	1.1936e+08	8.3738e+07	1.1639e+08
ZMO0581	1.07541e+07	5.52528e+06	1.87712e+07	1.12768e+07	8.10144e+06	1.63508e+07	2.16175e+07	1.81555e+07	7.20718e+06	5.8258e+06	1.77495e+07	6.12922e+06	3.96564e+07	1.14926e+07	1.51304e+07	9.70464e+06	8.49601e+06	1.36721e+07	8.94459e+06	8.62848e+06	1.35473e+07	6.63425e+06	2.44126e+06	1.59647e+07
ZMO0582	8.4025e+08	8.5308e+08	7.7671e+08	7.3674e+08	7.0279e+08	6.9507e+08	7.286e+08	6.7471e+08	6.9847e+08	8.4062e+08	8.49649e+08	8.3096e+08	7.7518e+08	7.6299e+08	7.5083e+08	6.8922e+08	6.6047e+08	6.994e+08	7.0489e+08	7.0409e+08	8.7394e+08	8.8985e+08	7.905e+08	7.8799e+08
ZMO0583	7.0039e+08	7.5294e+08	7.946e+08	6.4097e+08	6.5465e+08	6.8878e+08	6.3095e+08	6.35e+08	6.167e+08	6.4582e+08	5.736e+08	6.7553e+08	7.1501e+08	7.2208e+08	7.157e+08	6.7895e+08	6.4765e+08	6.4483e+08	6.0998e+08	6.4432e+08	6.8853e+08	5.9034e+08	6.3373e+08	6.2475e+08
ZMO0584	1.2439e+09	1.1738e+09	1.151e+09	1.1582e+09	1.0872e+09	1.1784e+09	1.1092e+09	1.0371e+09	1.0906e+09	1.0285e+09	9.2789e+08	1.0623e+09	1.2406e+09	1.5715e+09	1.2617e+09	1.3308e+09	1.2419e+09	1.2511e+09	1.1748e+09	1.2098e+09	1.1394e+09	9.0722e+08	1.1649e+09	9.7188e+08
ZMO0585	3.0331e+09	3.2075e+09	3.3348e+09	3.2341e+09	3.1489e+09	3.4255e+09	3.1205e+09	2.9075e+09	3.2806e+09	2.7109e+09	2.4334e+09	2.7024e+09	3.32e+09	3.7794e+09	3.608e+09	3.4034e+09	3.9488e+09	3.754e+09	3.1581e+09	3.3924e+09	3.3863e+09	2.3638e+09	3.4795e+09	2.7304e+09
ZMO0586	2.6734e+08	2.6998e+08	3.0199e+08	2.3857e+08	2.3992e+08	2.6669e+08	2.4755e+08	2.4371e+08	2.6697e+08	3.0847e+08	3.6533e+08	3.0725e+08	2.373e+08	3.7104e+08	3.3378e+08	2.8277e+08	2.7742e+08	2.6586e+08	2.6177e+08	2.7398e+08	2.8524e+08	3.694e+08	3.3784e+08	3.9602e+08
ZMO0587	1.3208e+09	1.6484e+09	1.583e+09	1.5103e+09	1.6752e+09	1.6286e+09	1.4178e+09	1.4406e+09	1.6432e+09	1.2774e+09	1.4846e+09	1.2783e+09	1.2525e+09	1.3036e+09	1.6753e+09	1.4865e+09	1.7664e+09	1.5724e+09	1.4008e+09	1.5315e+09	1.4045e+09	1.3962e+09	1.7191e+09	1.4582e+09
ZMO0588	1.9747e+07	1.1651e+07	4.0254e+07	4.8118e+07	9.225e+07	5.1014e+07	8.0379e+07	1.6609e+08	1.0299e+08	4.7513e+07	1.3845e+08	1.4862e+08	1.4797e+07	3.8869e+06	3.095e+07	4.9905e+07	6.689e+07	8.2117e+07	1.1121e+08	9.4595e+07	8.0895e+07	9.90849e+07	6.1386e+07	1.0046e+08
ZMO0589	3.8732e+08	4.3736e+08	3.4973e+08	3.8557e+08	3.9283e+08	3.5215e+08	3.8722e+08	3.3563e+08	3.4155e+08	4.0377e+08	4.1692e+08	4.04e+08	4.5468e+08	4.4434e+08	4.2603e+08	4.3613e+08	4.2122e+08	4.401e+08	4.9033e+08	4.3649e+08	4.6622e+08	5.5388e+08	4.6092e+08	5.5685e+08
ZMO0590	2.09447e+07	2.1246e+07	1.4977e+07	1.0193e+07	8.5482e+06	1.22408e+07	1.18281e+07	1.06348e+07	2.0536e+07	8.99471e+06	1.2817e+07	1.30615e+07	4.21967e+07	9.14211e+06	1.17762e+07	8.31693e+06	4.66558e+06	5.59479e+06	4.36736e+06	7.01646e+06	2.70348e+07	1.42631e+07	1.38386e+07	1.12872e+07
ZMO0591	3.8139e+08	1.4628e+08	3.0583e+08	2.3499e+08	2.2902e+08	1.607e+08	1.9075e+08	1.2764e+08	1.8241e+08	1.3898e+08	1.2426e+08	1.7536e+08	1.091e+08	3.7405e+08	2.3775e+08	1.6409e+08	1.6699e+08	1.3221e+08	1.7535e+08	1.5618e+08	1.4154e+08	1.9643e+08	1.2958e+08	1.4456e+08
ZMO0593	2.5275e+09	2.602e+09	2.642e+09	2.4059e+09	2.408e+09	2.4043e+09	2.2578e+09	2.3006e+09	2.5292e+09	2.2846e+09	2.4274e+09	2.2977e+09	2.4039e+09	2.6913e+09	2.6815e+09	2.4246e+09	2.3778e+09	2.4132e+09	2.1676e+09	2.1941e+09	2.2242e+09	2.5894e+09	2.5005e+09	2.6704e+09
ZMO0594	1.0756e+08	8.7379e+07	8.6205e+07	1.0748e+08	9.8126e+07	8.8459e+07	9.5793e+07	6.7291e+07	7.729e+07	8.5158e+07	6.5529e+07	9.1554e+07	1.1199e+08	7.4898e+07	7.768e+07	1.0216e+08	9.9991e+07	9.423e+07	9.6961e+07	9.5273e+07	8.52721e+07	1.1217e+08	8.8868e+07	1.0919e+08
ZMO0595	8.91688e+06	1.19659e+07	1.68039e+07	1.22617e+07	1.1203e+07	9.2786e+06	1.09925e+07	1.1809e+07	9.64324e+06	1.56569e+07	1.1934e+07	1.0585e+07	2.11129e+07	2.88173e+07	1.19111e+07	1.17448e+07	8.0914e+06	3.7892e+07	1.1941e+07	8.5473e+06	1.00652e+07	1.69836e+07	6.15521e+06	8.2781e+06
ZMO0597	9.984e+07	1.0715e+08	1.0776e+08	1.2549e+08	1.0161e+08	1.1657e+08	1.0769e+08	1.2488e+08	1.1333e+08	1.4024e+08	1.3459e+08	1.3567e+08	9.0739e+07	9.6772e+07	8.54e+07	1.0991e+08	1.0549e+08	1.0416e+08	1.1663e+08	1.0724e+08	1.107e+08	1.3288e+08	1.2975e+08	1.1983e+08
ZMO0598	9.6646e+07	8.0782e+07	8.5258e+07	8.6638e+07	7.9989e+07	8.5443e+07	7.8793e+07	9.0461e+07	7.2687e+07	1.086e+08	1.1382e+08	9.045e+07	7.3932e+07	3.6973e+07	6.6606e+07	9.6583e+07	8.4596e+07	6.9526e+07	7.8657e+07	6.8747e+07	6.5373e+07	1.1226e+08	6.8482e+07	1.1099e+08
ZMO0599	1.0303e+09	1.1162e+09	1.1466e+09	9.4434e+08	9.5147e+08	1.0329e+09	9.1866e+08	8.99721e+08	1.0623e+09	9.2239e+08	9.2689e+08	8.68e+08	1.0063e+09	1.1796e+09	1.0522e+09	1.078e+09	1.0432e+09	9.55099e+08	9.7546e+08	9.266e+08	8.9416e+08	9.3651e+08	1.035e+09	8.47831e+08
ZMO0601	4.2615e+07	4.4981e+07	3.8721e+07	6.0473e+07	5.0815e+07	3.7669e+07	5.9849e+07	5.7087e+07	3.7945e+07	5.8e+07	4.8961e+07	5.9763e+07	3.9785e+07	4.6332e+07	3.0703e+07	3.5436e+07	4.1881e+07	4.7693e+07	5.8811e+07	4.9543e+07	5.5297e+07	5.9047e+07	5.0266e+07	5.2403e+07
ZMO0602	1.2743e+08	1.5585e+08	1.2672e+08	1.0563e+08	9.2537e+07	1.0827e+08	1.1342e+08	1.2166e+08	9.9605e+07	9.8777e+07	8.33741e+07	9.351e+07	1.4577e+08	1.7457e+08	1.3598e+08	1.1965e+08	1.0105e+08	1.0201e+08	1.1323e+08	1.0449e+08	1.0699e+08	7.5863e+07	8.9365e+07	8.8799e+07
ZMO0603	1.5176e+08	1.7084e+08	1.8532e+08	1.2285e+08	1.0058e+08	1.4405e+08	1.0905e+08	1.5458e+08	1.315e+08	1.6516e+08	1.4088e+08	1.1441e+08	1.4734e+08	1.9241e+08	1.9575e+08	1.414e+08	1.3433e+08	1.3422e+08	1.4031e+08	1.219e+08	1.0184e+08	1.7996e+08	1.633e+08	1.4443e+08
ZMO0604	7.1341e+07	6.1577e+07	5.7483e+07	3.3048e+07	3.1131e+07	3.2828e+07	2.9218e+07	2.2936e+07	2.3433e+07	2.5447e+07	2.4904e+07	1.8607e+07	5.9284e+07	7.1825e+07	6.033e+07	3.4726e+07	2.2006e+07	2.7561e+07	2.5012e+07	1.9442e+07	2.7387e+07	2.4985e+07	1.7871e+07	2.7715e+07
ZMO0605	2.5971e+08	2.2613e+08	2.5952e+08	1.4904e+08	1.2597e+08	1.55e+08	1.2203e+08	1.0131e+08	1.1334e+08	1.2075e+08	1.22e+08	1.0912e+08	2.3502e+08	2.2753e+08	2.2337e+08	1.2289e+08	1.0327e+08	1.0298e+08	1.002e+08	8.9625e+07	9.9517e+07	1.0896e+08	9.8601e+07	1.1337e+08
ZMO0606	8.29879e+06	1.0119e+07	9.9675e+06	1.08796e+07	6.7764e+06	5.2915e+06	9.78957e+06	1.26883e+07	7.3122e+06	4.761e+06	4.2263e+06	4.474e+06	3.9529e+06	1.3221e+07	1.0417e+07	4.7433e+06	3.8316e+06	1.25804e+07	4.48126e+06	1.45349e+07	4.0465e+06	8.44507e+06	1.39993e+07	5.2884e+06
ZMO0607	2.2969e+08	1.7647e+08	1.7511e+08	5.1044e+07	3.9228e+07	4.8175e+07	2.4904e+07	2.1796e+07	2.5539e+07	1.8723e+07	1.894e+07	1.7493e+07	1.709e+08	1.5176e+08	1.5429e+08	4.0736e+07	6.3511e+07	3.6942e+07	9.9978e+06	2.292e+07	7.9841e+06	1.7362e+07	1.3234e+07	1.8846e+07
ZMO0608	9.3989e+07	7.7395e+07	7.321e+07	1.8799e+07	2.2292e+07	2.6555e+07	1.2375e+07	1.1979e+07	1.2801e+07	1.1375e+07	1.0808e+07	7.687e+06	8.09e+07	1.2691e+08	6.6263e+07	2.2654e+07	2.4658e+07	1.7063e+07	1.4026e+07	1.4134e+07	8.1178e+06	1.4295e+07	6.3833e+06	1.5008e+07
ZMO0609	3.1666e+07	3.0463e+07	3.5781e+07	1.5081e+07	1.4356e+07	1.2389e+07	1.3649e+07	2.5559e+07	1.2987e+07	3.6999e+07	5.1441e+07	3.3405e+07	3.6109e+07	3.8483e+07	2.3543e+07	1.5457e+07	1.3003e+07	2.0453e+07	3.0332e+07	1.9926e+07	3.4162e+07	1.2756e+08	7.4848e+07	1.4546e+08
ZMO0610	1.916e+07	1.3412e+07	1.5746e+07	7.42618e+06	1.1673e+07	9.7521e+06	1.54122e+07	9.59768e+06	1.0117e+07	1.03758e+07	7.9712e+06	8.3309e+06	3.73898e+07	6.0213e+06	2.16568e+07	1.2937e+07	1.4752e+07	9.7599e+06	1.6954e+07	9.782e+06	1.2545e+07	1.9063e+07	1.5135e+07	1.9749e+07
ZMO0611	2.2147e+09	1.8881e+09	1.5821e+09	7.1487e+08	7.3772e+08	6.9517e+08	5.1358e+08	5.4451e+08	4.9144e+08	7.1987e+08	7.139e+08	6.4027e+08	2.0505e+09	2.4969e+09	2.1532e+09	5.2179e+08	6.3122e+08	6.5553e+08	5.6723e+08	4.7341e+08	7.3439e+08	9.36711e+08	8.0665e+08	1.0138e+09
ZMO0612	3.6536e+07	3.8695e+07	4.0073e+07	2.5877e+07	2.3145e+07	2.656e+07	1.5984e+07	1.4179e+07	1.3207e+07	2.5074e+07	3.0584e+07	2.401e+07	4.1876e+07	5.5443e+07	4.1922e+07	3.0806e+07	2.1062e+07	2.3726e+07	2.0539e+07	1.5579e+07	1.8362e+07	6.1553e+07	2.5815e+07	5.0847e+07
ZMO0613	2.24269e+07	1.58079e+07	1.2787e+07	9.57745e+06	1.15892e+07	1.4341e+07	1.90531e+07	1.42036e+07	5.33835e+06	1.88018e+07	2.84267e+07	9.88196e+06	3.88039e+07	1.09171e+07	1.37728e+07	1.21642e+07	1.5938e+07	4.01557e+06	2.04842e+07	1.82351e+07	2.08444e+07	1.48071e+07	1.1812e+07	1.45019e+07
ZMO0616	1.2357e+07	1.371e+07	1.3996e+07	1.6949e+07	1.3109e+07	1.6114e+07	1.1756e+07	1.4724e+07	1.4698e+07	1.3179e+07	1.354e+07	1.0247e+07	1.4611e+07	1.668e+07	1.384e+07	6.46184e+06	1.2285e+07	1.0954e+07	1.171e+07	1.0393e+07	1.1589e+07	1.5239e+07	1.339e+07	1.2666e+07
ZMO0617	1.0986e+07	1.8585e+07	1.7489e+07	9.8765e+06	1.3608e+07	1.2387e+07	1.0012e+07	1.3107e+07	8.5528e+06	7.8889e+06	1.0252e+07	1.2992e+07	1.6037e+07	2.0643e+07	1.3779e+07	1.0252e+07	8.7357e+06	1.2823e+07	1.206e+07	1.0169e+07	1.1392e+07	1.3788e+07	1.0215e+07	1.1615e+07
ZMO0619	1.2066e+08	1.4208e+08	1.8651e+08	1.6059e+08	1.3141e+08	1.3665e+08	1.0173e+08	8.6685e+07	9.3495e+07	3.1638e+07	2.1477e+07	2.6709e+07	1.9491e+08	1.0594e+08	2.1137e+08	1.4648e+08	1.477e+08	1.2465e+08	8.4482e+07	1.1037e+08	6.3471e+07	9.9733e+06	1.4342e+07	1.3544e+07
ZMO0621	1.7697e+08	1.6306e+08	1.5162e+08	1.2909e+08	1.1518e+08	1.2408e+08	9.8661e+07	8.8433e+07	1.0309e+08	8.6319e+07	7.9363e+07	7.9391e+07	1.5012e+08	2.0374e+08	1.7757e+08	1.3041e+08	1.3167e+08	1.2624e+08	1.0868e+08	9.3214e+07	9.7144e+07	7.8448e+07	9.0427e+07	8.7765e+07
ZMO0624	6.0406e+07	7.472e+07	7.1918e+07	3.9499e+07	3.612e+07	4.333e+07	2.3864e+07	2.3733e+07	2.63e+07	3.9145e+07	3.0287e+07	2.6345e+07	6.8409e+07	8.5716e+07	7.8912e+07	3.1418e+07	3.3158e+07	3.1818e+07	3.0486e+07	2.2331e+07	1.8407e+07	3.1828e+07	2.416e+07	2.499e+07
ZMO0625	1.9498e+08	2.0531e+08	1.7858e+08	1.3786e+08	1.0655e+08	1.1361e+08	1.0792e+08	1.2059e+08	1.1105e+08	1.5651e+08	1.3823e+08	1.1731e+08	2.0406e+08	1.9019e+08	2.0825e+08	1.4507e+08	1.4273e+08	1.2248e+08	1.49e+08	1.1286e+08	1.457e+08	1.8341e+08	1.3532e+08	1.8911e+08
ZMO0626	1.8707e+08	1.6201e+08	1.3105e+08	1.3606e+08	1.31e+08	1.2163e+08	1.1626e+08	1.1173e+08	9.8094e+07	1.4045e+08	1.252e+08	1.1675e+08	2.0482e+08	2.1751e+08	1.5087e+08	1.4336e+08	1.3792e+08	1.5004e+08	1.4421e+08	1.1719e+08	1.4845e+08	1.7795e+08	1.3837e+08	1.7677e+08
ZMO0627	4.5431e+08	3.6521e+08	4.364e+08	3.3692e+08	2.8219e+08	3.2757e+08	3.1704e+08	2.5355e+08	3.0329e+08	2.7197e+08	2.6939e+08	2.426e+08	4.2974e+08	4.7548e+08	5.7256e+08	3.4479e+08	3.908e+08	3.5295e+08	2.8697e+08	3.1414e+08	2.7586e+08	2.6572e+08	3.3648e+08	2.735e+08
ZMO0628	1.2684e+08	1.2028e+08	1.0514e+08	6.2483e+07	7.1555e+07	5.992e+07	6.2925e+07	5.0425e+07	5.1528e+07	5.6878e+07	4.7551e+07	5.6151e+07	1.1547e+08	1.8481e+08	1.1278e+08	5.7542e+07	6.8015e+07	6.6841e+07	5.2673e+07	6.6492e+07	6.5717e+07	4.841e+07	5.7508e+07	5.6528e+07
ZMO0629	2.0263e+08	1.6848e+08	1.3974e+08	9.33639e+07	7.5572e+07	7.5963e+07	6.556e+07	5.4793e+07	7.3032e+07	3.8298e+07	3.1874e+07	3.1261e+07	1.7885e+08	2.2977e+08	1.8487e+08	8.2696e+07	9.3889e+07	9.2811e+07	5.6221e+07	6.7331e+07	6.8459e+07	4.9573e+07	5.2884e+07	4.7259e+07
ZMO0634	2.5652e+07	2.5109e+07	2.4385e+07	1.4135e+07	9.056e+06	9.5342e+06	9.8203e+06	1.3605e+07	2.98905e+07	1.3294e+07	1.399e+07	1.2366e+07	2.0923e+07	1.0158e+07	2.2239e+07	7.03612e+06	1.1577e+07	1.0384e+07	4.50354e+06	1.3758e+07	9.3709e+06	2.35805e+06	1.0672e+07	1.3292e+07
ZMO0635	2.0392e+09	1.9775e+09	1.1011e+09	7.949e+08	9.26359e+08	7.0481e+08	8.7442e+08	8.7653e+08	6.6369e+08	9.1466e+08	9.0868e+08	9.7997e+08	1.7869e+09	1.9876e+09	1.6315e+09	9.02881e+08	8.1439e+08	1.1108e+09	8.474e+08	1.1171e+09	1.3588e+09	1.073e+09	9.28749e+08	1.1757e+09
ZMO0636	4.2059e+07	4.1075e+07	4.614e+07	1.597e+07	2.0385e+07	1.118e+07	6.7468e+06	1.4142e+07	9.4763e+06	1.4592e+07	6.0761e+06	1.0077e+07	6.695e+07	3.7048e+07	6.0747e+07	9.64989e+06	1.7766e+07	1.7569e+07	1.61e+07	1.3831e+07	1.4409e+07	2.45708e+07	1.1399e+07	1.0715e+07
ZMO0637	9.89521e+07	9.9113e+07	6.5225e+07	4.51e+07	3.6721e+07	3.9348e+07	4.2761e+07	3.2954e+07	3.2934e+07	3.4482e+07	3.4288e+07	3.8927e+07	9.6624e+07	1.1251e+08	9.7977e+07	4.2838e+07	3.5577e+07	3.4319e+07	2.9507e+07	2.9598e+07	4.2078e+07	4.2316e+07	4.1865e+07	4.3335e+07
ZMO0642	3.1267e+07	2.341e+07	8.5701e+06	7.6704e+06	1.0517e+07	8.0095e+06	8.2027e+06	9.3079e+06	5.5059e+06	4.70589e+06	7.3699e+06	9.8492e+06	1.0819e+07	2.3703e+07	7.56504e+06	1.69915e+07	1.269e+07	5.44528e+06	1.2325e+07	6.0062e+06	7.22899e+06	9.99381e+06	6.2355e+06	8.9246e+06
ZMO0643	1.1852e+08	1.3107e+08	1.282e+08	1.342e+08	1.1872e+08	1.3526e+08	1.2619e+08	1.2409e+08	1.3215e+08	1.4258e+08	1.5311e+08	1.3961e+08	1.0274e+08	1.0858e+08	1.0602e+08	1.1302e+08	1.1316e+08	1.1306e+08	1.302e+08	1.1173e+08	1.2644e+08	1.3291e+08	1.3517e+08	1.4845e+08
ZMO0644	2.2352e+08	2.6496e+08	2.9257e+08	2.136e+08	2.4372e+08	3.248e+08	2.3219e+08	2.1986e+08	3.2386e+08	2.581e+08	2.9364e+08	2.4293e+08	1.6183e+08	2.8051e+08	2.8907e+08	2.4841e+08	2.2695e+08	2.0802e+08	2.2564e+08	2.0564e+08	1.9659e+08	2.8896e+08	2.6109e+08	2.5584e+08
ZMO0647	3.1326e+07	2.3947e+07	2.2058e+07	2.6316e+07	2.8504e+07	2.1322e+07	2.0969e+07	2.896e+07	1.4303e+07	2.9566e+07	1.8413e+07	2.6335e+07	2.8702e+07	1.5818e+07	2.0366e+07	1.9888e+07	2.2241e+07	1.6612e+07	2.5647e+07	3.1175e+07	1.8466e+07	2.2411e+07	2.1489e+07	2.647e+07
ZMO0650	1.9832e+08	1.0974e+08	7.0931e+07	5.2757e+07	8.3038e+07	7.4934e+07	8.7728e+07	6.4619e+07	7.181e+07	5.8681e+07	8.4152e+07	7.9887e+07	1.3902e+08	9.00111e+06	8.1589e+07	5.623e+07	1.484e+08	2.84655e+07	6.9992e+07	8.3324e+07	7.7363e+07	7.4913e+07	6.9047e+07	8.3504e+07
ZMO0651	7.8633e+07	7.503e+07	6.6422e+07	5.4733e+07	5.0007e+07	5.198e+07	4.2591e+07	4.3195e+07	3.9988e+07	5.5455e+07	5.8545e+07	5.1932e+07	4.9193e+07	8.3652e+07	5.0038e+07	4.2059e+07	4.088e+07	4.2231e+07	4.2482e+07	3.7588e+07	4.1048e+07	6.0593e+07	4.9963e+07	5.7112e+07
ZMO0652	1.1409e+08	8.913e+07	8.52491e+07	9.4725e+07	1.2006e+08	8.3796e+07	6.6399e+07	8.2126e+07	5.7761e+07	5.4606e+07	6.7753e+07	7.0693e+07	9.448e+07	1.0479e+08	8.615e+07	1.0145e+08	9.3681e+07	1.0126e+08	7.8117e+07	7.4062e+07	7.0293e+07	5.9541e+07	3.8798e+07	7.9102e+07
ZMO0653	2.7237e+07	3.4253e+07	2.7052e+07	2.7025e+07	2.0512e+07	2.1342e+07	2.2526e+07	2.7387e+07	2.3406e+07	3.3373e+07	3.627e+07	2.4931e+07	2.5294e+07	2.9652e+07	1.9319e+07	2.151e+07	2.3358e+07	2.3277e+07	2.6647e+07	2.0458e+07	1.9359e+07	3.3212e+07	2.6141e+07	3.1828e+07
ZMO0654	2.8372e+08	3.0651e+08	2.7453e+08	2.7324e+08	2.6166e+08	2.6376e+08	2.944e+08	3.5297e+08	2.6809e+08	3.5451e+08	3.5007e+08	3.2363e+08	2.509e+08	2.5483e+08	2.6632e+08	2.4171e+08	2.4474e+08	2.495e+08	2.6578e+08	2.7092e+08	2.6706e+08	3.2281e+08	2.6927e+08	2.9454e+08
ZMO0655	3.6597e+08	3.6742e+08	3.3153e+08	3.224e+08	3.0541e+08	3.2218e+08	2.7884e+08	2.9963e+08	2.7561e+08	2.1865e+08	1.8118e+08	2.5227e+08	2.7298e+08	3.1176e+08	2.8197e+08	2.3478e+08	2.6409e+08	2.2264e+08	2.1759e+08	2.4959e+08	2.219e+08	1.4534e+08	2.1468e+08	1.5308e+08
ZMO0656	6.9956e+08	6.1073e+08	5.5245e+08	5.3442e+08	5.7965e+08	5.2181e+08	4.6813e+08	4.1636e+08	4.3582e+08	4.6049e+08	4.8183e+08	4.8799e+08	5.8091e+08	5.8085e+08	5.2492e+08	4.8282e+08	5.3925e+08	5.4801e+08	4.7636e+08	4.5049e+08	5.7991e+08	6.4125e+08	4.3316e+08	5.9897e+08
ZMO0657	2.6983e+08	2.409e+08	2.285e+08	2.1793e+08	2.0246e+08	1.9864e+08	2.0848e+08	1.8505e+08	2.1082e+08	1.8375e+08	1.9943e+08	1.7633e+08	1.7431e+08	1.6171e+08	1.7641e+08	1.5811e+08	1.5978e+08	1.5839e+08	1.6652e+08	1.2591e+08	1.3314e+08	1.3987e+08	1.5673e+08	1.2785e+08
ZMO0658	3.0355e+08	3.4589e+08	2.4026e+08	2.8056e+08	2.7703e+08	2.5872e+08	2.7215e+08	2.327e+08	2.4295e+08	2.6535e+08	2.0568e+08	2.4758e+08	2.7411e+08	2.6174e+08	2.2355e+08	2.6901e+08	2.5644e+08	2.579e+08	2.4183e+08	2.34e+08	2.9737e+08	1.9719e+08	2.5215e+08	2.0246e+08
ZMO0659	1.1417e+08	9.8523e+07	1.1899e+08	7.1729e+07	6.6686e+07	7.0597e+07	4.4125e+07	5.5885e+07	4.9268e+07	5.5029e+07	3.6189e+07	4.6632e+07	1.1668e+08	1.6634e+08	1.0506e+08	5.6267e+07	6.761e+07	5.1212e+07	4.1173e+07	5.2464e+07	4.0584e+07	5.6857e+07	5.0198e+07	4.463e+07
ZMO0660	3.5017e+10	4.149e+10	4.0298e+10	4.2946e+10	4.2737e+10	4.4519e+10	4.63351e+10	4.95339e+10	4.7741e+10	4.3309e+10	4.7766e+10	4.4594e+10	4.1634e+10	4.6676e+10	4.7246e+10	5.1467e+10	4.94869e+10	5.35569e+10	5.2169e+10	5.1064e+10	5.87691e+10	4.3985e+10	5.0998e+10	4.9476e+10
ZMO0661	6.961e+08	7.1478e+08	6.8564e+08	6.7139e+08	6.8868e+08	7.78769e+08	6.9575e+08	8.829e+08	7.701e+08	8.3953e+08	9.6802e+08	8.3679e+08	7.3819e+08	9.4328e+08	8.1077e+08	7.9563e+08	6.3699e+08	7.4379e+08	7.7585e+08	7.6406e+08	8.5918e+08	9.5642e+08	8.3772e+08	8.7482e+08
ZMO0662	8.13211e+09	9.06279e+09	8.61969e+09	6.9578e+09	7.64301e+09	7.4028e+09	6.9415e+09	7.908e+09	6.6458e+09	7.98099e+09	8.65871e+09	8.40009e+09	9.05961e+09	1.0829e+10	9.84549e+09	7.99489e+09	8.5496e+09	8.8953e+09	8.88019e+09	8.20199e+09	9.38159e+09	1.02e+10	9.12949e+09	1.109e+10
ZMO0663	1.3274e+07	8.2451e+06	1.0378e+07	1.0168e+07	1.4077e+07	9.5948e+06	1.1311e+07	1.1327e+07	1.1232e+07	1.7009e+07	1.8805e+07	1.776e+07	1.5971e+07	1.1337e+07	1.5309e+07	1.0253e+07	1.6159e+07	1.8249e+07	1.8535e+07	1.6778e+07	2.0478e+07	2.3267e+07	2.2537e+07	2.1787e+07
ZMO0664	4.4307e+08	4.7497e+08	4.5394e+08	4.9648e+08	4.8449e+08	4.9262e+08	4.5372e+08	5.8484e+08	4.6355e+08	3.9571e+08	4.0259e+08	3.4284e+08	3.9681e+08	3.8652e+08	3.6743e+08	3.8321e+08	3.9528e+08	3.956e+08	3.9944e+08	4.4949e+08	3.8879e+08	3.3985e+08	3.2966e+08	3.1594e+08
ZMO0665	1.55977e+07	1.02856e+07	3.39774e+07	5.3328e+06	4.46775e+06	1.72457e+07	7.10643e+06	1.0461e+07	1.1942e+07	4.7538e+07	4.7922e+07	4.8761e+07	6.64414e+06	1.78402e+07	2.91371e+07	7.0167e+06	7.3936e+06	1.24225e+07	8.90194e+06	8.38439e+06	1.1986e+07	1.7812e+07	1.6212e+07	2.5769e+07
ZMO0666	3.3289e+08	2.9174e+08	3.5165e+08	2.5353e+08	3.8525e+08	3.3829e+08	2.5368e+08	3.1479e+08	2.5907e+08	1.2694e+08	1.3099e+08	1.1061e+08	2.8939e+08	2.7229e+08	2.764e+08	2.9927e+08	4.2669e+08	3.1453e+08	2.3491e+08	2.6458e+08	2.6551e+08	1.2162e+08	7.1651e+07	1.1732e+08
ZMO0667	5.2464e+08	5.835e+08	4.1055e+08	3.957e+08	2.835e+08	2.9087e+08	3.2478e+08	3.0621e+08	2.6788e+08	5.0415e+08	2.8927e+08	3.5804e+08	6.679e+08	3.4576e+08	3.1477e+08	3.2281e+08	3.6585e+08	4.7796e+08	3.659e+08	3.4716e+08	4.1133e+08	5.3236e+08	4.2755e+08	4.0893e+08
ZMO0668	1.7809e+09	1.8134e+09	1.7568e+09	1.5191e+09	1.4611e+09	1.6199e+09	1.6533e+09	2.1097e+09	1.6621e+09	2.6671e+09	2.2151e+09	2.041e+09	2.1111e+09	2.9036e+09	1.7853e+09	1.8903e+09	1.8857e+09	1.9973e+09	2.0063e+09	2.0495e+09	1.9825e+09	3.0836e+09	2.4531e+09	2.7945e+09
ZMO0669	2.712e+09	2.4979e+09	2.6737e+09	3.102e+09	3.1988e+09	3.3307e+09	4.0155e+09	4.531e+09	3.4425e+09	3.822e+09	4.4873e+09	4.699e+09	2.7092e+09	3.6537e+09	3.1231e+09	3.7772e+09	3.4825e+09	3.8702e+09	4.0995e+09	4.4134e+09	4.5003e+09	3.8207e+09	4.4187e+09	4.6234e+09
ZMO0671	4.4049e+09	3.6966e+09	5.2831e+09	6.7009e+09	5.9601e+09	6.89939e+09	7.54959e+09	9.181e+09	7.49581e+09	8.6358e+09	9.70819e+09	8.267e+09	3.7378e+09	5.6218e+09	5.6956e+09	7.2154e+09	7.30901e+09	7.46629e+09	8.42951e+09	8.16281e+09	8.5104e+09	9.27769e+09	9.18841e+09	9.18331e+09
ZMO0672	2.2476e+07	1.9531e+07	1.5508e+07	1.4152e+07	1.2773e+07	1.146e+07	1.3209e+07	1.1081e+07	8.0999e+06	9.75479e+06	1.0475e+07	2.1278e+07	2.1701e+07	4.2855e+07	1.5281e+07	1.0981e+07	9.8112e+06	1.5747e+07	1.5771e+07	1.4147e+07	2.5644e+07	1.8643e+07	1.9304e+07	1.9347e+07
ZMO0674	7.5265e+07	5.328e+07	8.4267e+07	1.0689e+08	1.0769e+08	9.4457e+07	1.0673e+08	1.1593e+08	1.0104e+08	5.9609e+07	5.4765e+07	3.8806e+07	8.4665e+07	4.7699e+07	1.0145e+08	1.1076e+08	1.277e+08	1.207e+08	1.0638e+08	9.98719e+07	8.9063e+07	4.7814e+07	4.206e+07	3.776e+07
ZMO0675	2.4044e+08	1.8247e+08	1.9394e+08	2.3635e+08	2.5821e+08	2.5037e+08	2.7426e+08	2.6408e+08	2.6777e+08	2.844e+08	3.2663e+08	2.8842e+08	1.9986e+08	1.9954e+08	1.9034e+08	2.2132e+08	2.7153e+08	2.5495e+08	2.6085e+08	2.9706e+08	2.9284e+08	3.3731e+08	2.88e+08	3.6532e+08
ZMO0676	6.5539e+09	7.6315e+09	7.79139e+09	8.3919e+09	9.0248e+09	9.483e+09	8.91779e+09	8.10129e+09	9.3071e+09	7.88161e+09	7.91151e+09	8.2789e+09	7.6829e+09	9.37589e+09	8.60271e+09	8.8902e+09	9.59631e+09	9.17629e+09	8.6507e+09	8.9656e+09	8.808e+09	7.30791e+09	9.13729e+09	7.69551e+09
ZMO0677	5.62911e+09	6.078e+09	5.6264e+09	5.937e+09	6.0026e+09	6.2363e+09	5.6214e+09	5.51801e+09	6.15191e+09	5.47321e+09	5.0051e+09	5.38191e+09	6.6249e+09	7.9035e+09	7.16579e+09	7.11939e+09	7.36519e+09	7.51281e+09	6.2999e+09	6.8241e+09	6.4994e+09	5.1634e+09	6.92879e+09	5.7164e+09
ZMO0678	4.2205e+07	2.5198e+07	2.896e+07	4.4233e+07	4.1057e+07	3.9691e+07	6.2507e+07	5.2051e+07	3.9183e+07	4.9459e+07	4.3445e+07	4.4014e+07	3.1781e+07	2.4415e+07	3.986e+07	3.4262e+07	4.8806e+07	5.8492e+07	5.3166e+07	4.9629e+07	5.1562e+07	6.4856e+07	5.0361e+07	7.5414e+07
ZMO0680	1.8894e+07	1.9597e+07	1.9234e+07	2.7282e+07	2.0631e+07	2.1411e+07	2.6947e+07	2.6156e+07	1.8772e+07	3.1018e+07	2.7497e+07	2.6497e+07	1.9818e+07	1.8882e+07	1.8009e+07	2.2527e+07	2.338e+07	1.9307e+07	2.0201e+07	2.7939e+07	2.6874e+07	2.6931e+07	2.7769e+07	2.6827e+07
ZMO0681	7.5295e+07	6.9665e+07	6.8908e+07	8.4365e+07	6.9614e+07	8.3452e+07	8.9916e+07	8.8415e+07	8.7298e+07	1.068e+08	1.0109e+08	9.7218e+07	7.5071e+07	7.0579e+07	8.0114e+07	8.199e+07	8.2094e+07	7.9512e+07	8.96839e+07	8.4761e+07	9.7216e+07	1.0289e+08	1.0308e+08	1.0065e+08
ZMO0682	5.8782e+08	5.3325e+08	6.4117e+08	7.9864e+08	7.6159e+08	7.7371e+08	8.9766e+08	8.3233e+08	8.37e+08	9.8326e+08	9.4475e+08	1.0323e+09	6.2945e+08	7.2892e+08	6.4153e+08	7.8068e+08	8.2113e+08	8.1459e+08	8.8258e+08	8.9286e+08	8.2037e+08	9.219e+08	9.2291e+08	9.847e+08
ZMO0683	2.0386e+08	1.6373e+08	1.9313e+08	2.207e+08	1.9307e+08	2.1505e+08	2.3472e+08	2.2711e+08	2.2066e+08	3.196e+08	2.6168e+08	2.631e+08	1.5613e+08	1.5799e+08	1.8891e+08	2.4566e+08	2.3412e+08	2.2501e+08	2.8164e+08	2.4478e+08	2.5379e+08	2.9069e+08	3.1334e+08	3.0941e+08
ZMO0684	2.8533e+09	2.8135e+09	3.1077e+09	3.728e+09	3.7998e+09	3.9392e+09	3.7743e+09	3.9182e+09	3.9708e+09	4.4942e+09	4.7365e+09	4.50401e+09	2.962e+09	3.3912e+09	3.5096e+09	3.8333e+09	3.6613e+09	3.8248e+09	3.8535e+09	3.9587e+09	4.3015e+09	4.322e+09	4.6931e+09	4.2596e+09
ZMO0685	1.2942e+08	1.3544e+08	1.797e+08	1.7649e+08	1.636e+08	1.8898e+08	1.669e+08	1.9661e+08	2.017e+08	2.3642e+08	2.0741e+08	1.9955e+08	1.5882e+08	2.3622e+08	2.2528e+08	1.8869e+08	1.9392e+08	1.8563e+08	1.836e+08	1.7491e+08	1.4633e+08	2.4379e+08	2.3715e+08	2.425e+08
ZMO0686	1.5288e+08	1.1356e+08	1.4128e+08	1.3027e+08	1.3798e+08	1.5193e+08	1.4036e+08	1.727e+08	1.5559e+08	1.4981e+08	1.51e+08	1.1541e+08	9.0047e+07	1.4994e+08	1.3711e+08	1.4563e+08	1.3185e+08	1.2251e+08	1.5327e+08	1.1663e+08	1.3158e+08	1.3894e+08	1.4535e+08	1.2798e+08
ZMO0687	2.0871e+09	2.1113e+09	1.7824e+09	1.5249e+09	1.4484e+09	1.2937e+09	1.4575e+09	1.1918e+09	1.2747e+09	1.3086e+09	1.1711e+09	1.2812e+09	2.0905e+09	2.3495e+09	1.8991e+09	1.4871e+09	1.5349e+09	1.4844e+09	1.4382e+09	1.4782e+09	1.5908e+09	1.1891e+09	1.5398e+09	1.287e+09
ZMO0688	3.00126e+07	7.8922e+06	1.9066e+07	9.7331e+06	7.87172e+06	5.66023e+06	8.8054e+06	5.59642e+06	1.26118e+07	2.05517e+07	4.29451e+06	1.0403e+07	8.5488e+06	1.19918e+07	4.9915e+06	2.44596e+07	7.42494e+06	5.45978e+06	1.35072e+07	7.2222e+06	5.4304e+06	1.47352e+07	1.39267e+07	6.2015e+06
ZMO0689	1.3172e+10	1.496e+10	1.5212e+10	1.3749e+10	1.4772e+10	1.4304e+10	1.2514e+10	1.4715e+10	1.3684e+10	1.0382e+10	1.0198e+10	1.0513e+10	1.7074e+10	1.9295e+10	1.9313e+10	1.6075e+10	1.891e+10	1.688e+10	1.426e+10	1.8173e+10	1.6013e+10	1.0588e+10	1.481e+10	1.2106e+10
ZMO0691	5.7786e+08	5.3938e+08	5.8313e+08	4.855e+08	4.9259e+08	5.0013e+08	4.6127e+08	4.6471e+08	4.6834e+08	5.1297e+08	5.6234e+08	5.1114e+08	5.3423e+08	5.2325e+08	4.972e+08	4.0064e+08	4.9959e+08	4.3695e+08	4.1171e+08	4.5943e+08	4.695e+08	5.7419e+08	5.523e+08	5.9324e+08
ZMO0692	2.9513e+09	3.3048e+09	3.4622e+09	3.1513e+09	3.0458e+09	3.1816e+09	2.9912e+09	3.3222e+09	3.2088e+09	3.4601e+09	3.6128e+09	3.5386e+09	3.1139e+09	3.8259e+09	3.4704e+09	3.2224e+09	3.0826e+09	3.0381e+09	3.3947e+09	3.2926e+09	3.5169e+09	3.9838e+09	3.8041e+09	3.8508e+09
ZMO0693	1.6039e+09	1.6445e+09	1.783e+09	3.5063e+09	3.3324e+09	2.7816e+09	3.955e+09	2.9305e+09	3.002e+09	2.6233e+09	2.5353e+09	3.6053e+09	1.8993e+09	2.9748e+09	2.4841e+09	3.7319e+09	4.0499e+09	3.9188e+09	3.4022e+09	4.5905e+09	4.56509e+09	2.1827e+09	3.598e+09	2.8734e+09
ZMO0694	3.1161e+09	3.1097e+09	3.3618e+09	5.4942e+09	5.2677e+09	5.4724e+09	6.7594e+09	6.61459e+09	6.32769e+09	4.75239e+09	5.04821e+09	3.5963e+09	3.4448e+09	4.1818e+09	4.0246e+09	6.7252e+09	7.54919e+09	7.16811e+09	6.98431e+09	7.75509e+09	6.72311e+09	3.667e+09	3.1775e+09	3.4536e+09
ZMO0695	1.3384e+08	1.2648e+08	1.3687e+08	1.7164e+08	1.5797e+08	1.6661e+08	1.717e+08	1.9118e+08	1.6508e+08	1.8861e+08	1.9931e+08	1.8943e+08	1.2885e+08	9.6448e+07	1.0872e+08	1.4923e+08	1.2693e+08	1.4749e+08	1.4983e+08	1.4439e+08	1.5094e+08	1.7493e+08	1.7539e+08	1.6728e+08
ZMO0699	1.1515e+07	1.2501e+07	1.0766e+07	2.1303e+07	1.56452e+07	3.49057e+06	1.7001e+07	1.7543e+07	1.14561e+07	1.6352e+07	1.1962e+07	1.2879e+07	8.56356e+06	1.3762e+07	1.13732e+07	4.70925e+06	1.6085e+07	4.65105e+06	1.0447e+07	2.1663e+07	1.4557e+07	8.2607e+06	1.0001e+07	9.8382e+06
ZMO0703	2.1226e+08	2.3432e+08	2.2004e+08	2.6479e+08	2.0131e+08	2.3402e+08	2.3597e+08	2.5004e+08	2.2353e+08	2.0285e+08	1.7792e+08	2.0714e+08	2.8783e+08	2.1466e+08	2.3921e+08	2.4749e+08	2.6577e+08	2.5108e+08	2.4716e+08	2.4055e+08	2.3529e+08	1.8507e+08	2.1904e+08	1.8003e+08
ZMO0704	2.1698e+09	2.3623e+09	2.1243e+09	1.7977e+09	2.0179e+09	1.819e+09	1.7786e+09	1.8982e+09	1.8305e+09	1.8161e+09	2.2225e+09	2.1715e+09	2.1484e+09	2.3078e+09	2.4656e+09	1.8867e+09	1.7811e+09	1.9795e+09	1.9059e+09	1.8683e+09	2.3531e+09	2.2944e+09	2.1311e+09	2.3535e+09
ZMO0705	4.3986e+07	2.7649e+07	2.7027e+07	3.1415e+07	3.6341e+07	2.2694e+07	3.5782e+07	4.1572e+07	2.3669e+07	3.5879e+07	3.2767e+07	4.2896e+07	3.6222e+07	5.3698e+07	2.5483e+07	2.9187e+07	2.684e+07	3.5298e+07	3.8565e+07	4.1269e+07	6.2415e+07	4.5823e+07	3.8788e+07	4.2043e+07
ZMO0706	1.2315e+08	9.2691e+07	9.9197e+07	9.2506e+07	9.0563e+07	9.9553e+07	9.43471e+07	8.38959e+07	9.5774e+07	8.3039e+07	7.514e+07	8.4612e+07	8.6438e+07	1.008e+08	8.9245e+07	9.9164e+07	9.2931e+07	9.4424e+07	9.2907e+07	8.9752e+07	8.96111e+07	7.4228e+07	7.3839e+07	8.5891e+07
ZMO0707	1.4512e+09	1.6094e+09	1.3192e+09	1.3e+09	1.2575e+09	1.1432e+09	1.2454e+09	1.253e+09	1.2981e+09	1.0959e+09	1.1393e+09	1.1629e+09	1.3972e+09	1.112e+09	1.3907e+09	1.2853e+09	1.2797e+09	1.3553e+09	1.1918e+09	1.2156e+09	1.4746e+09	1.003e+09	1.2192e+09	1.0686e+09
ZMO0708	7.2071e+08	7.0544e+08	7.6694e+08	5.9333e+08	5.1785e+08	6.5882e+08	5.913e+08	5.554e+08	5.5089e+08	6.8027e+08	7.5434e+08	6.5618e+08	7.261e+08	7.9903e+08	7.0981e+08	5.4544e+08	5.0677e+08	5.9359e+08	5.9666e+08	5.4752e+08	7.0773e+08	8.2219e+08	6.7877e+08	7.2303e+08
ZMO0709	1.7011e+09	1.9395e+09	1.8652e+09	1.7774e+09	1.7991e+09	1.8898e+09	1.7006e+09	1.6127e+09	1.9343e+09	1.5882e+09	1.5224e+09	1.7289e+09	1.8803e+09	2.1406e+09	1.8803e+09	1.8121e+09	1.7298e+09	1.7556e+09	1.6247e+09	1.6263e+09	1.7693e+09	1.2975e+09	1.7963e+09	1.4154e+09
ZMO0710	1.0054e+08	9.4232e+07	8.6597e+07	9.668e+07	8.9044e+07	9.0589e+07	9.4324e+07	9.9767e+07	9.1109e+07	9.255e+07	9.3452e+07	9.23439e+07	8.5938e+07	8.653e+07	8.7471e+07	8.0218e+07	8.0228e+07	8.0486e+07	8.62099e+07	8.5559e+07	9.8639e+07	9.13291e+07	9.1997e+07	8.18171e+07
ZMO0711	5.8729e+07	4.5661e+07	5.3251e+07	6.9572e+07	6.8443e+07	6.7544e+07	7.8507e+07	6.7392e+07	6.8554e+07	9.21831e+07	9.1376e+07	7.3248e+07	5.6956e+07	5.8912e+07	5.1382e+07	6.3502e+07	7.1482e+07	6.2277e+07	8.4786e+07	8.2502e+07	7.7318e+07	1.0849e+08	7.8632e+07	9.7633e+07
ZMO0712	2.2051e+09	2.3161e+09	2.4717e+09	2.4589e+09	2.3764e+09	2.4805e+09	2.6768e+09	2.9273e+09	2.5384e+09	3.1768e+09	2.721e+09	2.8489e+09	2.2999e+09	2.9552e+09	2.5223e+09	2.4676e+09	2.6785e+09	2.822e+09	2.8638e+09	2.7863e+09	2.8317e+09	2.6966e+09	2.7889e+09	2.6183e+09
ZMO0713	5.4539e+08	5.6306e+08	5.8723e+08	4.9408e+08	4.7312e+08	5.5489e+08	4.8843e+08	5.9696e+08	5.1015e+08	6.8442e+08	6.6961e+08	6.0738e+08	5.1324e+08	5.983e+08	5.6395e+08	4.7333e+08	4.9428e+08	4.5214e+08	5.1473e+08	4.8953e+08	4.6246e+08	6.8403e+08	5.7428e+08	5.9268e+08
ZMO0714	5.667e+08	5.6971e+08	5.6838e+08	6.5738e+08	7.1615e+08	6.7079e+08	7.0143e+08	6.4678e+08	6.9688e+08	7.6457e+08	8.0476e+08	8.2325e+08	6.2861e+08	4.7032e+08	5.4366e+08	6.4604e+08	6.5346e+08	6.8478e+08	7.3055e+08	7.3821e+08	7.9223e+08	7.3999e+08	8.2195e+08	8.7014e+08
ZMO0715	6.82221e+09	7.65749e+09	6.98621e+09	6.32671e+09	6.6025e+09	6.3457e+09	6.318e+09	6.11139e+09	6.3861e+09	6.5168e+09	7.3536e+09	6.5659e+09	6.94681e+09	7.9081e+09	7.32859e+09	6.52601e+09	6.6113e+09	6.86349e+09	6.6176e+09	6.57339e+09	7.49151e+09	7.62609e+09	7.8743e+09	8.13321e+09
ZMO0716	5.3108e+08	5.1149e+08	5.4428e+08	4.258e+08	3.8586e+08	4.3894e+08	4.2022e+08	4.7192e+08	3.8625e+08	5.0166e+08	4.736e+08	4.2937e+08	5.3114e+08	5.3201e+08	5.4068e+08	4.4116e+08	4.7124e+08	4.3624e+08	4.6615e+08	3.8624e+08	4.1157e+08	4.5823e+08	4.3091e+08	4.6159e+08
ZMO0718	3.5459e+07	3.2117e+07	3.5496e+07	4.4134e+07	3.4596e+07	4.0684e+07	4.1826e+07	4.6575e+07	4.3065e+07	5.0648e+07	5.4557e+07	4.8205e+07	3.2998e+07	4.3293e+07	3.7189e+07	4.1358e+07	4.0102e+07	3.5931e+07	4.2296e+07	4.0004e+07	3.7665e+07	4.4984e+07	5.4442e+07	5.1442e+07
ZMO0719	4.384e+08	3.8132e+08	3.9868e+08	4.0355e+08	3.6782e+08	3.6945e+08	3.7217e+08	3.7393e+08	3.5916e+08	2.9688e+08	2.7988e+08	2.8861e+08	4.193e+08	4.028e+08	3.8652e+08	3.8379e+08	4.1201e+08	3.8163e+08	3.8672e+08	4.2504e+08	3.8537e+08	2.9879e+08	3.0875e+08	2.8754e+08
ZMO0720	2.0337e+09	2.2551e+09	2.105e+09	2.0587e+09	2.0462e+09	2.059e+09	2.0161e+09	1.8776e+09	1.9998e+09	1.7633e+09	1.6255e+09	1.8429e+09	2.3469e+09	2.5191e+09	2.3323e+09	2.2288e+09	2.3362e+09	2.3097e+09	2.0678e+09	2.1826e+09	2.1101e+09	1.6224e+09	2.0951e+09	1.9522e+09
ZMO0721	9.3527e+08	1.0926e+09	9.3244e+08	8.0093e+08	8.2749e+08	8.1241e+08	8.38399e+08	9.0021e+08	8.6153e+08	9.1871e+08	9.8508e+08	1.0095e+09	9.84909e+08	9.8333e+08	9.7954e+08	8.6975e+08	8.235e+08	9.2787e+08	9.4786e+08	8.7781e+08	1.1305e+09	9.35701e+08	1.0322e+09	9.5093e+08
ZMO0722	4.1286e+09	4.3664e+09	4.8358e+09	4.3654e+09	4.39009e+09	4.8162e+09	3.6388e+09	3.9957e+09	4.3109e+09	2.2577e+09	2.0985e+09	2.2599e+09	3.2242e+09	3.568e+09	3.7558e+09	3.4044e+09	3.6612e+09	3.4254e+09	2.9361e+09	3.4119e+09	2.7792e+09	1.6551e+09	2.1582e+09	1.4862e+09
ZMO0724	3.7157e+09	4.1948e+09	4.847e+09	4.2375e+09	4.0108e+09	4.2572e+09	4.1777e+09	3.6771e+09	3.9977e+09	3.949e+09	3.6578e+09	4.1732e+09	4.2292e+09	4.8104e+09	4.7824e+09	4.3386e+09	4.2958e+09	3.9632e+09	3.8505e+09	4.2456e+09	4.0638e+09	3.8984e+09	4.4065e+09	3.8099e+09
ZMO0725	9.0821e+09	8.89401e+09	8.08419e+09	5.8897e+09	6.36289e+09	6.0877e+09	6.0149e+09	6.17311e+09	5.89749e+09	5.8812e+09	6.58801e+09	6.3954e+09	7.50439e+09	7.78071e+09	8.7909e+09	5.98909e+09	5.811e+09	5.7677e+09	6.0156e+09	6.60379e+09	7.36841e+09	5.9035e+09	6.6895e+09	6.27991e+09
ZMO0726	1.0486e+10	1.1918e+10	1.1582e+10	8.7066e+09	8.9716e+09	9.80659e+09	8.03061e+09	9.74801e+09	9.30279e+09	9.4905e+09	1.053e+10	9.88391e+09	1.0753e+10	1.4341e+10	1.25e+10	9.8912e+09	8.96041e+09	9.52499e+09	9.7339e+09	9.44751e+09	1.0217e+10	1.0055e+10	1.0438e+10	1.0758e+10
ZMO0727	7.67399e+09	6.1272e+09	5.87541e+09	5.46259e+09	5.68479e+09	5.5447e+09	6.0902e+09	5.8504e+09	5.5432e+09	5.7409e+09	6.1962e+09	5.52011e+09	6.2948e+09	5.1984e+09	6.01849e+09	5.9005e+09	5.9874e+09	5.2627e+09	6.1303e+09	5.9877e+09	5.6618e+09	6.45971e+09	5.6092e+09	6.8654e+09
ZMO0728	1.764e+10	1.728e+10	1.9805e+10	1.5699e+10	1.6127e+10	1.7312e+10	1.6038e+10	1.7239e+10	1.6312e+10	1.7379e+10	1.8058e+10	1.7491e+10	1.7782e+10	2.208e+10	1.9161e+10	1.7972e+10	1.7833e+10	1.7743e+10	1.6817e+10	1.7948e+10	1.8003e+10	1.7487e+10	1.8503e+10	1.9517e+10
ZMO0731	2.0473e+10	2.1033e+10	2.252e+10	1.7522e+10	1.7769e+10	1.8256e+10	1.6805e+10	1.9531e+10	1.8299e+10	1.9621e+10	2.0698e+10	1.9819e+10	1.9728e+10	2.2855e+10	2.1214e+10	1.7216e+10	1.5982e+10	1.693e+10	1.7739e+10	1.6963e+10	1.8288e+10	1.9891e+10	1.8506e+10	2.0276e+10
ZMO0732	2.2599e+10	2.3938e+10	2.4268e+10	1.8535e+10	1.8515e+10	1.875e+10	1.8082e+10	2.0743e+10	1.838e+10	1.9966e+10	2.1741e+10	2.0603e+10	2.1858e+10	2.5396e+10	2.3543e+10	1.7951e+10	1.6899e+10	1.8105e+10	1.8311e+10	1.7829e+10	2.0099e+10	2.0032e+10	1.9462e+10	2.057e+10
ZMO0734	1.8581e+09	1.9319e+09	2.0921e+09	2.4313e+09	2.611e+09	2.619e+09	2.3465e+09	2.1929e+09	2.449e+09	2.181e+09	1.98e+09	2.2e+09	1.9456e+09	1.9994e+09	1.8751e+09	2.6181e+09	2.6263e+09	2.6275e+09	2.2866e+09	2.3666e+09	2.2603e+09	1.9253e+09	2.3633e+09	2.0125e+09
ZMO0735	2.2711e+09	2.4453e+09	2.3447e+09	1.9669e+09	1.9772e+09	1.9645e+09	1.9144e+09	1.9023e+09	2.0527e+09	2.1719e+09	2.3095e+09	2.2097e+09	2.1448e+09	2.3347e+09	2.078e+09	1.7182e+09	1.8094e+09	1.8498e+09	1.8744e+09	1.7814e+09	2.1922e+09	2.1752e+09	2.1009e+09	2.1902e+09
ZMO0736	1.1271e+08	9.0618e+07	1.1207e+08	9.8242e+07	9.9754e+07	9.5237e+07	1.0834e+08	8.5727e+07	1.1797e+08	1.0845e+08	3.24835e+07	1.2919e+08	9.5013e+07	9.99281e+07	1.1698e+08	1.0158e+08	1.1112e+08	1.3521e+08	1.1908e+08	1.3903e+08	9.6918e+07	8.94699e+07	1.0147e+08	1.3552e+08
ZMO0737	2.3433e+08	2.9928e+08	1.3991e+08	5.3482e+07	4.2606e+07	7.4061e+07	5.8473e+07	5.5444e+07	4.828e+07	1.3651e+08	6.2918e+07	6.5992e+07	2.8455e+08	2.0331e+08	1.3873e+08	6.5657e+07	1.2223e+08	9.9197e+07	1.1089e+08	4.783e+07	4.5974e+07	1.2424e+08	6.9399e+07	1.3324e+08
ZMO0738	2.4218e+09	2.4323e+09	2.4824e+09	2.4734e+09	2.9499e+09	2.5658e+09	2.3964e+09	2.4055e+09	2.2851e+09	2.0357e+09	1.963e+09	2.1265e+09	2.5117e+09	2.5027e+09	2.4612e+09	2.3537e+09	2.4648e+09	2.5762e+09	2.1448e+09	2.4543e+09	2.3577e+09	1.755e+09	2.1981e+09	2.0352e+09
ZMO0739	8.1048e+08	7.7039e+08	9.1243e+08	1.1149e+09	9.7136e+08	1.1529e+09	1.1132e+09	9.44089e+08	1.0552e+09	9.8268e+08	9.292e+08	9.47599e+08	9.59119e+08	4.7383e+08	1.042e+09	1.2795e+09	1.2532e+09	1.3021e+09	1.1779e+09	9.8933e+08	1.0433e+09	9.6439e+08	1.2091e+09	1.0707e+09
ZMO0740	8.7791e+09	8.99109e+09	8.68421e+09	1.3628e+10	1.3421e+10	1.3611e+10	1.2945e+10	1.2605e+10	1.4052e+10	9.54241e+09	8.8377e+09	1.0112e+10	8.41951e+09	8.71651e+09	8.93939e+09	1.3583e+10	1.3005e+10	1.3585e+10	1.2499e+10	1.2887e+10	1.1761e+10	8.22621e+09	1.0285e+10	8.4153e+09
ZMO0743	8.8965e+08	1.0472e+09	9.4602e+08	8.097e+08	8.2409e+08	7.8147e+08	7.6172e+08	7.663e+08	7.4779e+08	8.767e+08	9.1995e+08	8.8993e+08	9.9215e+08	1.2198e+09	1.0252e+09	8.0894e+08	8.8024e+08	8.91049e+08	8.9627e+08	8.5516e+08	9.32779e+08	1.0348e+09	1.0056e+09	1.056e+09
ZMO0744	1.17261e+07	1.21922e+07	9.85553e+06	2.87241e+07	1.1713e+07	3.0401e+06	1.59339e+07	1.28645e+07	4.6207e+06	4.77654e+06	2.57949e+07	3.9686e+06	1.92996e+07	1.09062e+07	8.01837e+06	6.50449e+06	2.76838e+07	2.24757e+07	1.70503e+07	8.96659e+06	9.9946e+06	8.60055e+06	8.89321e+06	2.05436e+07
ZMO0746	8.90339e+07	8.1411e+07	1.1177e+08	7.6697e+07	7.2321e+07	9.7729e+07	6.157e+07	7.0279e+07	7.5327e+07	2.8851e+07	2.6738e+07	2.2498e+07	8.2026e+07	1.2826e+08	1.2913e+08	8.7561e+07	9.2613e+07	7.3055e+07	7.3502e+07	7.0856e+07	6.7157e+07	3.7024e+07	2.3426e+07	2.7185e+07
ZMO0747	1.4135e+08	8.2546e+07	1.4834e+08	7.3202e+07	7.1375e+07	4.6928e+07	4.8282e+07	6.5509e+07	2.364e+07	2.1183e+07	1.764e+07	3.451e+07	2.1987e+08	5.1469e+08	1.5906e+08	8.011e+07	8.584e+07	1.2029e+08	4.2499e+07	8.29621e+07	1.1457e+08	1.8027e+07	1.4713e+07	2.3819e+07
ZMO0748	3.5205e+09	3.7865e+09	3.2344e+09	3.037e+09	3.3002e+09	3.382e+09	3.2838e+09	3.4306e+09	3.6711e+09	2.8833e+09	3.2498e+09	3.1624e+09	3.4258e+09	3.6429e+09	3.3261e+09	3.3388e+09	3.434e+09	3.5898e+09	3.2352e+09	3.2658e+09	3.6973e+09	2.8019e+09	3.3658e+09	2.9882e+09
ZMO0749	5.1455e+08	6.2646e+08	5.332e+08	5.9047e+08	5.3202e+08	5.8661e+08	6.8823e+08	7.2751e+08	7.6652e+08	7.3536e+08	7.0812e+08	8.5286e+08	6.5327e+08	5.397e+08	5.9748e+08	5.4829e+08	5.6406e+08	6.2258e+08	6.7588e+08	6.9431e+08	6.8379e+08	8.43e+08	6.9081e+08	6.9617e+08
ZMO0750	9.5634e+07	1.2487e+08	1.0362e+08	1.2584e+08	1.2562e+08	9.5259e+07	1.1287e+08	1.1167e+08	9.95759e+07	1.2689e+08	1.3856e+08	1.3073e+08	1.2498e+08	6.0761e+07	1.0795e+08	9.88209e+07	1.0767e+08	1.1318e+08	1.1116e+08	1.0812e+08	1.1096e+08	1.3029e+08	1.168e+08	1.3812e+08
ZMO0751	2.814e+08	2.7561e+08	3.8337e+07	4.2804e+07	8.2125e+07	4.4521e+08	9.895e+06	2.9926e+07	4.743e+07	1.68175e+07	3.4063e+07	9.4627e+07	4.6988e+07	5.8021e+07	4.7737e+07	4.8094e+07	4.7194e+07	7.71705e+06	4.493e+07	1.08663e+07	9.67689e+06	2.8916e+08	5.189e+08	3.6266e+07
ZMO0752	3.5106e+08	3.4435e+08	4.2158e+08	4.4054e+08	4.152e+08	4.1767e+08	3.8892e+08	4.1319e+08	4.3686e+08	5.0375e+08	5.009e+08	3.4161e+08	3.5051e+08	3.9865e+08	3.6037e+08	3.8626e+08	4.5116e+08	4.2585e+08	3.8855e+08	3.5528e+08	3.1848e+08	6.1072e+08	4.8556e+08	5.4232e+08
ZMO0753	1.4717e+09	1.2463e+09	1.6318e+09	2.1659e+09	1.9444e+09	1.9369e+09	2.1815e+09	2.0592e+09	2.0718e+09	1.9806e+09	1.9888e+09	2.1767e+09	1.4174e+09	1.7282e+09	1.7078e+09	1.7898e+09	2.5725e+09	2.4918e+09	1.8614e+09	2.5199e+09	1.7837e+09	1.7714e+09	1.8346e+09	1.8936e+09
ZMO0754	9.4705e+07	7.7422e+07	9.99441e+07	9.71059e+07	8.5645e+07	8.9074e+07	8.6075e+07	6.4413e+07	7.5959e+07	1.0183e+08	9.0968e+07	8.2394e+07	9.1406e+07	1.1145e+08	8.9253e+07	8.8661e+07	1.0307e+08	8.97e+07	7.1749e+07	8.891e+07	8.6701e+07	7.8654e+07	8.6224e+07	8.3872e+07
ZMO0756	1.764e+09	1.979e+09	1.7787e+09	1.5678e+09	1.4736e+09	1.5791e+09	1.4076e+09	1.2183e+09	1.4239e+09	1.3253e+09	1.1886e+09	1.3564e+09	1.7223e+09	1.9456e+09	1.7301e+09	1.3992e+09	1.4353e+09	1.3357e+09	1.2277e+09	1.2895e+09	1.206e+09	1.1593e+09	1.4059e+09	1.1614e+09
ZMO0757	4.8859e+08	4.6266e+08	4.7013e+08	4.538e+08	4.6679e+08	4.7964e+08	4.4044e+08	3.9701e+08	4.273e+08	4.1896e+08	3.778e+08	4.4559e+08	4.3415e+08	4.8632e+08	4.4417e+08	4.0078e+08	4.4135e+08	4.1186e+08	3.8523e+08	4.0205e+08	3.8772e+08	3.6929e+08	4.0222e+08	3.7009e+08
ZMO0758	1.4127e+08	1.5643e+08	2.3075e+08	2.7283e+08	2.3576e+08	3.2948e+08	2.991e+08	2.5835e+08	3.4478e+08	2.5776e+08	2.5375e+08	2.401e+08	2.0843e+08	2.0828e+08	2.534e+08	2.5445e+08	2.5269e+08	2.3572e+08	2.5012e+08	2.4028e+08	1.8064e+08	2.4344e+08	2.7187e+08	2.033e+08
ZMO0759	3.7758e+08	4.087e+08	4.4163e+08	5.0733e+08	4.346e+08	5.0161e+08	5.0258e+08	4.7055e+08	4.8786e+08	4.6514e+08	4.2601e+08	4.326e+08	3.8404e+08	4.8756e+08	5.0508e+08	4.8185e+08	4.4541e+08	4.6953e+08	4.5156e+08	4.5774e+08	4.3111e+08	3.799e+08	4.5967e+08	3.7003e+08
ZMO0760	6.5559e+08	5.7232e+08	7.49e+08	8.7939e+08	8.8578e+08	9.6821e+08	9.6908e+08	8.9893e+08	1.1445e+09	9.0665e+08	8.7402e+08	8.6935e+08	8.51929e+08	6.3449e+08	8.5643e+08	9.2492e+08	9.6014e+08	1.0435e+09	9.76e+08	1.082e+09	9.4243e+08	7.4861e+08	1.1287e+09	7.8183e+08
ZMO0763	4.3124e+08	4.4496e+08	3.8539e+08	3.9883e+08	3.7804e+08	4.0504e+08	3.0639e+08	3.2883e+08	2.8736e+08	1.5119e+08	1.1647e+08	1.6597e+08	3.8171e+08	3.9462e+08	4.0203e+08	3.6432e+08	3.7988e+08	3.9358e+08	3.1805e+08	3.3359e+08	3.3409e+08	1.599e+08	1.6863e+08	1.3558e+08
ZMO0764	4.2297e+08	3.6408e+08	4.4172e+08	4.5466e+08	4.46e+08	4.4138e+08	4.4227e+08	4.4193e+08	4.8107e+08	4.0882e+08	3.8823e+08	3.8098e+08	4.6521e+08	5.1336e+08	4.6977e+08	4.6691e+08	4.599e+08	4.9425e+08	4.4012e+08	4.1241e+08	4.28e+08	3.7896e+08	4.414e+08	3.7185e+08
ZMO0765	3.1804e+09	3.5215e+09	3.7863e+09	3.1537e+09	3.0892e+09	3.5e+09	2.9981e+09	2.9612e+09	3.4754e+09	3.8402e+09	3.9452e+09	3.5083e+09	3.363e+09	3.8129e+09	3.8493e+09	3.3196e+09	3.4225e+09	3.3905e+09	3.3341e+09	3.1785e+09	3.2537e+09	4.239e+09	4.1182e+09	4.2165e+09
ZMO0766	1.5145e+09	1.508e+09	1.4163e+09	1.5504e+09	1.484e+09	1.643e+09	1.7188e+09	1.6918e+09	1.729e+09	2.2948e+09	2.1235e+09	1.8861e+09	1.3424e+09	1.3061e+09	1.3364e+09	1.3917e+09	1.4374e+09	1.3731e+09	1.6733e+09	1.6297e+09	1.6402e+09	2.1684e+09	1.7988e+09	1.8845e+09
ZMO0767	7.8256e+07	5.7915e+07	7.8018e+07	4.4741e+07	3.6913e+07	5.0546e+07	3.8506e+07	3.4442e+07	4.0584e+07	4.2714e+07	3.9449e+07	4.1093e+07	4.884e+07	7.9955e+07	5.3786e+07	3.0789e+07	2.6024e+07	2.0763e+07	2.667e+07	2.1126e+07	2.0073e+07	2.5551e+07	2.7378e+07	2.4605e+07
ZMO0769	4.7389e+08	5.703e+08	5.4395e+08	4.5471e+08	4.4647e+08	4.0935e+08	4.4428e+08	4.2716e+08	4.1623e+08	4.7823e+08	4.9609e+08	4.8324e+08	5.3518e+08	4.9858e+08	5.1161e+08	3.8823e+08	4.0277e+08	4.2636e+08	4.1513e+08	4.1231e+08	4.7152e+08	5.1774e+08	4.6215e+08	4.8812e+08
ZMO0770	1.0045e+08	9.5494e+07	1.009e+08	6.8798e+07	7.8518e+07	7.6333e+07	6.9628e+07	8.2435e+07	7.3107e+07	8.1832e+07	7.4129e+07	8.1891e+07	9.2196e+07	1.1584e+08	8.9009e+07	6.0666e+07	7.2436e+07	6.1733e+07	7.075e+07	8.1724e+07	6.9451e+07	8.97699e+07	7.5323e+07	8.029e+07
ZMO0773	1.4106e+09	1.5013e+09	1.8579e+09	1.6932e+09	1.6588e+09	1.8792e+09	1.519e+09	1.4271e+09	1.6967e+09	1.7134e+09	1.7072e+09	1.5884e+09	1.9146e+09	2.0314e+09	1.9148e+09	1.896e+09	1.9521e+09	1.7832e+09	1.7869e+09	1.7222e+09	1.5926e+09	1.921e+09	2.0738e+09	1.9588e+09
ZMO0774	7.9537e+07	7.8829e+07	6.2794e+07	7.957e+07	7.3859e+07	7.31e+07	8.6095e+07	9.4905e+07	9.3342e+07	1.0876e+08	9.2071e+07	9.0831e+07	6.7531e+07	8.9949e+07	6.3808e+07	8.4546e+07	7.29e+07	7.6633e+07	8.2125e+07	7.9868e+07	7.2504e+07	8.8302e+07	7.86389e+07	8.5868e+07
ZMO0776	5.7167e+08	5.9652e+08	6.2672e+08	5.0192e+08	5.1016e+08	5.3463e+08	4.8097e+08	5.5974e+08	4.7463e+08	5.0261e+08	5.6633e+08	5.7976e+08	5.3847e+08	6.4039e+08	6.1922e+08	4.9169e+08	4.9434e+08	5.1346e+08	4.47e+08	5.3048e+08	4.9532e+08	5.0888e+08	4.8019e+08	5.6201e+08
ZMO0777	7.5271e+07	8.4495e+07	9.6514e+07	1.1736e+08	9.1027e+07	1.1888e+08	1.312e+08	1.1362e+08	1.2702e+08	1.2359e+08	1.1674e+08	1.2687e+08	8.9045e+07	7.8113e+07	9.7766e+07	9.7502e+07	9.115e+07	1.0069e+08	9.603e+07	8.8133e+07	7.6935e+07	7.7712e+07	9.66011e+07	7.5973e+07
ZMO0778	2.3685e+08	2.7734e+08	2.3731e+08	2.409e+08	2.4999e+08	2.4489e+08	2.6117e+08	3.0114e+08	2.5445e+08	3.2001e+08	3.1688e+08	3.0112e+08	2.2654e+08	2.173e+08	2.0461e+08	1.7427e+08	1.7571e+08	1.7497e+08	2.0963e+08	1.9537e+08	1.919e+08	2.6173e+08	2.1384e+08	2.1091e+08
ZMO0779	5.1675e+08	5.4903e+08	5.6108e+08	5.7281e+08	5.7424e+08	6.0457e+08	6.0727e+08	7.7571e+08	6.0672e+08	7.171e+08	7.3014e+08	7.3408e+08	5.1493e+08	5.4773e+08	4.4438e+08	4.5009e+08	4.4388e+08	4.492e+08	4.9489e+08	4.7029e+08	4.5889e+08	5.1817e+08	5.0678e+08	5.1751e+08
ZMO0780	2.6685e+08	2.6194e+08	2.5631e+08	2.4764e+08	2.2369e+08	2.3346e+08	2.3732e+08	2.9739e+08	2.1081e+08	2.6442e+08	2.3497e+08	2.8463e+08	2.3214e+08	2.3178e+08	2.2918e+08	1.8338e+08	1.7853e+08	1.8452e+08	1.9029e+08	1.8955e+08	1.7902e+08	1.9117e+08	1.5973e+08	1.8847e+08
ZMO0781	8.702e+08	7.8215e+08	8.0009e+08	7.83361e+08	7.3027e+08	7.2614e+08	8.2652e+08	8.6504e+08	6.9436e+08	9.48481e+08	8.4531e+08	1.0067e+09	8.3574e+08	6.7372e+08	7.2651e+08	7.0633e+08	7.9789e+08	7.4404e+08	8.0644e+08	7.8511e+08	8.0149e+08	8.6993e+08	8.5281e+08	9.517e+08
ZMO0782	5.2168e+09	5.7559e+09	5.8886e+09	5.7026e+09	5.9619e+09	5.91211e+09	5.6022e+09	5.373e+09	5.74351e+09	4.8827e+09	4.6868e+09	5.2505e+09	5.98279e+09	6.94559e+09	6.17231e+09	5.8862e+09	6.2961e+09	6.1321e+09	5.44019e+09	5.8358e+09	5.5528e+09	4.3592e+09	5.6556e+09	4.6331e+09
ZMO0783	8.80439e+09	9.59121e+09	9.12789e+09	1.0192e+10	9.7066e+09	9.22439e+09	9.88119e+09	9.0113e+09	9.31719e+09	7.8613e+09	7.3754e+09	9.24509e+09	9.5064e+09	8.8754e+09	9.09349e+09	9.89241e+09	1.0706e+10	1.0957e+10	9.40191e+09	1.0447e+10	1.0967e+10	6.7367e+09	9.8575e+09	8.73189e+09
ZMO0784	3.196e+08	2.5974e+08	3.2333e+08	4.416e+08	4.6023e+08	5.0151e+08	4.3003e+08	4.4941e+08	4.7899e+08	3.1147e+08	3.9534e+08	3.7538e+08	2.9611e+08	1.3563e+08	2.7225e+08	4.5932e+08	5.3067e+08	3.9216e+08	4.8811e+08	5.1217e+08	3.483e+08	3.4095e+08	4.2631e+08	4.3311e+08
ZMO0785	1.2395e+08	1.1624e+08	1.2726e+08	1.6266e+08	1.5193e+08	1.4634e+08	1.3499e+08	1.3502e+08	1.4806e+08	1.4663e+08	1.513e+08	1.4004e+08	1.1882e+08	1.4211e+08	1.3534e+08	1.6214e+08	1.84e+08	1.5807e+08	1.5118e+08	1.5758e+08	1.5058e+08	1.6434e+08	1.6426e+08	1.7836e+08
ZMO0786	1.8062e+08	1.6838e+08	2.056e+08	2.4075e+08	2.6517e+08	2.6225e+08	2.5392e+08	2.9975e+08	2.5119e+08	2.7413e+08	2.7679e+08	2.4588e+08	1.1469e+08	1.1526e+08	1.1684e+08	1.8678e+08	1.7112e+08	1.7371e+08	1.7873e+08	1.8545e+08	1.5567e+08	2.1532e+08	1.478e+08	1.9514e+08
ZMO0787	9.3768e+08	8.9913e+08	8.57e+08	9.9475e+08	1.0314e+09	9.9128e+08	1.0503e+09	1.2664e+09	1.0245e+09	1.0396e+09	1.1762e+09	1.235e+09	5.6603e+08	5.372e+08	5.5e+08	6.627e+08	6.0881e+08	6.5868e+08	7.1344e+08	7.2839e+08	7.1635e+08	7.8717e+08	6.9145e+08	7.1484e+08
ZMO0788	1.877e+08	2.283e+08	2.1531e+08	2.3864e+08	2.6018e+08	2.2755e+08	2.4451e+08	3.3385e+08	2.2651e+08	2.8626e+08	2.9244e+08	2.7794e+08	1.5981e+08	1.3998e+08	1.5672e+08	1.8402e+08	1.6463e+08	1.7317e+08	1.8338e+08	1.9316e+08	1.8777e+08	1.9566e+08	1.8665e+08	1.7327e+08
ZMO0791	7.0315e+08	6.2407e+08	5.567e+08	5.6209e+08	5.7709e+08	5.1261e+08	5.7683e+08	5.6644e+08	4.4993e+08	5.6659e+08	5.6961e+08	5.6394e+08	6.215e+08	5.7453e+08	5.5161e+08	6.2536e+08	6.8956e+08	7.9629e+08	7.9328e+08	6.8545e+08	7.7499e+08	7.8651e+08	6.7266e+08	8.38011e+08
ZMO0792	9.6379e+08	1.1423e+09	1.0795e+09	8.92799e+08	1.0441e+09	1.0121e+09	8.7915e+08	9.4697e+08	1.0191e+09	9.7169e+08	1.0505e+09	1.0189e+09	1.1372e+09	1.1639e+09	1.2222e+09	1.0959e+09	1.0131e+09	1.1453e+09	1.1289e+09	1.003e+09	1.3042e+09	1.24e+09	1.227e+09	1.2239e+09
ZMO0794	1.9687e+08	2.0954e+08	2.1202e+08	1.6835e+08	1.4308e+08	1.6245e+08	1.4234e+08	1.2266e+08	1.3554e+08	9.987e+07	7.0846e+07	9.40691e+07	1.5968e+08	1.8023e+08	1.7454e+08	1.266e+08	1.2991e+08	1.0928e+08	1.0133e+08	1.0099e+08	9.3732e+07	7.7362e+07	9.9871e+07	6.3752e+07
ZMO0797	1.4791e+09	1.6881e+09	1.4846e+09	1.5836e+09	1.5572e+09	1.6194e+09	1.452e+09	1.4302e+09	1.5371e+09	1.4563e+09	1.5152e+09	1.5328e+09	1.7328e+09	1.6957e+09	1.7599e+09	1.5356e+09	1.6501e+09	1.7594e+09	1.4677e+09	1.4991e+09	1.605e+09	1.6068e+09	1.5992e+09	1.6986e+09
ZMO0798	2.0319e+08	1.8097e+08	1.9802e+08	2.3233e+08	1.7125e+08	2.3093e+08	2.3901e+08	2.4045e+08	2.1485e+08	3.0345e+08	2.2375e+08	2.5147e+08	2.0432e+08	3.1011e+08	2.0658e+08	2.0565e+08	2.7728e+08	2.2752e+08	2.3082e+08	3.1225e+08	2.4406e+08	2.8253e+08	3.3273e+08	2.5836e+08
ZMO0800	2.8369e+07	2.78e+07	2.9571e+07	3.4568e+07	2.6737e+07	3.033e+07	4.0669e+07	3.3693e+07	3.1559e+07	5.1086e+07	3.2089e+07	3.7911e+07	3.3039e+07	4.7606e+07	3.3427e+07	3.7097e+07	4.3557e+07	3.1524e+07	3.4753e+07	4.2706e+07	3.7894e+07	4.168e+07	5.6103e+07	3.7455e+07
ZMO0801	3.0304e+08	2.4821e+08	3.287e+08	3.534e+08	2.8249e+08	2.9525e+08	3.8209e+08	3.7877e+08	3.3481e+08	4.371e+08	3.4867e+08	4.632e+08	3.5221e+08	5.6909e+08	3.1139e+08	3.5496e+08	4.4629e+08	3.4367e+08	3.6847e+08	5.6352e+08	4.4011e+08	4.2948e+08	5.0631e+08	4.5397e+08
ZMO0803	3.7205e+08	3.6333e+08	3.5036e+08	3.4202e+08	3.2451e+08	3.1512e+08	2.536e+08	2.6114e+08	2.404e+08	1.1548e+08	9.3358e+07	1.2044e+08	3.1434e+08	3.4127e+08	2.99e+08	2.4522e+08	2.6895e+08	2.3951e+08	1.9441e+08	2.3896e+08	1.9899e+08	1.1333e+08	1.3487e+08	8.94791e+07
ZMO0804	1.6444e+09	1.7312e+09	1.4736e+09	2.0997e+09	2.1233e+09	1.9857e+09	2.0064e+09	1.7155e+09	2.0059e+09	1.5751e+09	1.6062e+09	1.8643e+09	1.4553e+09	1.3044e+09	1.2429e+09	1.9123e+09	1.6468e+09	1.7567e+09	1.359e+09	1.638e+09	1.8098e+09	1.1371e+09	1.6176e+09	1.2446e+09
ZMO0805	6.3357e+08	6.3314e+08	7.438e+08	1.025e+09	1.1314e+09	9.3282e+08	1.0816e+09	1.0329e+09	1.0189e+09	1.2328e+09	1.1278e+09	1.0889e+09	3.9167e+08	4.8418e+08	4.5544e+08	8.0692e+08	6.9282e+08	7.0603e+08	8.1115e+08	6.5884e+08	6.7836e+08	9.55811e+08	9.1435e+08	8.4258e+08
ZMO0806	1.3521e+09	1.3036e+09	1.476e+09	1.5815e+09	1.5466e+09	1.5602e+09	1.5148e+09	1.6336e+09	1.7189e+09	1.6424e+09	1.7547e+09	1.7086e+09	1.271e+09	1.5659e+09	1.477e+09	1.6844e+09	1.595e+09	1.6293e+09	1.8035e+09	1.5873e+09	1.9036e+09	1.6444e+09	1.8382e+09	1.7127e+09
ZMO0807	4.4541e+08	4.6638e+08	5.0007e+08	3.3604e+08	3.4262e+08	3.2119e+08	3.5184e+08	3.3644e+08	3.4479e+08	3.7337e+08	3.9539e+08	3.9218e+08	4.377e+08	4.875e+08	4.6121e+08	3.2711e+08	2.9405e+08	3.1985e+08	3.185e+08	3.0295e+08	3.6041e+08	4.0573e+08	3.4712e+08	3.9049e+08
ZMO0809	1.419e+08	1.4069e+08	1.3389e+08	1.1023e+08	1.2442e+08	1.1816e+08	9.5909e+07	8.8469e+07	1.0208e+08	9.1516e+07	9.7476e+07	9.4598e+07	1.2966e+08	1.2812e+08	1.2931e+08	1.381e+08	1.1982e+08	1.151e+08	1.0448e+08	1.0448e+08	1.0308e+08	1.1869e+08	1.2194e+08	1.2101e+08
ZMO0810	1.0051e+08	1.2191e+08	8.7222e+07	7.7149e+07	7.9787e+07	7.6323e+07	7.6801e+07	6.418e+07	6.6677e+07	7.8322e+07	7.7422e+07	7.9811e+07	9.8301e+07	9.5038e+07	8.2538e+07	6.5838e+07	7.2709e+07	7.1381e+07	7.2664e+07	6.2976e+07	7.6646e+07	9.06631e+07	7.3002e+07	7.5146e+07
ZMO0811	4.3999e+08	6.045e+08	5.5498e+08	5.0834e+08	5.2771e+08	5.4716e+08	5.1298e+08	4.7442e+08	4.9866e+08	4.4028e+08	4.5362e+08	4.615e+08	6.1229e+08	5.4361e+08	6.1207e+08	6.0519e+08	5.5838e+08	5.8529e+08	5.0617e+08	5.1497e+08	5.2742e+08	5.6354e+08	5.5765e+08	5.5503e+08
ZMO0812	1.1972e+07	1.1836e+07	1.3802e+07	2.3688e+07	2.6618e+07	2.2908e+07	2.5832e+07	2.7985e+07	3.2278e+07	3.639e+07	5.2533e+07	3.7325e+07	1.5615e+07	1.0079e+07	2.0513e+07	2.155e+07	2.9895e+07	2.2815e+07	4.5806e+07	3.5088e+07	3.554e+07	5.411e+07	4.2543e+07	5.3861e+07
ZMO0813	7.3294e+08	5.8614e+08	6.6978e+08	6.9395e+08	7.4632e+08	6.8823e+08	7.1905e+08	7.3243e+08	7.5401e+08	6.3076e+08	7.1416e+08	6.6939e+08	6.8586e+08	6.9687e+08	6.903e+08	8.4428e+08	8.4648e+08	8.3758e+08	8.0652e+08	9.282e+08	8.1306e+08	7.2846e+08	8.0594e+08	7.8418e+08
ZMO0814	1.5908e+08	1.8427e+08	1.639e+08	1.5035e+08	1.5634e+08	1.5407e+08	1.6548e+08	1.9421e+08	1.6701e+08	2.1018e+08	2.3078e+08	2.038e+08	1.8986e+08	1.8403e+08	1.6826e+08	1.7289e+08	1.5894e+08	1.7863e+08	1.8574e+08	1.7643e+08	1.815e+08	2.2964e+08	1.9959e+08	2.2288e+08
ZMO0815	5.91483e+06	1.51463e+07	2.63445e+06	2.24132e+07	6.07471e+06	6.90069e+06	1.98311e+07	1.71611e+07	4.61138e+06	2.41222e+07	5.72414e+06	2.31366e+07	1.18786e+07	7.3839e+06	1.88244e+07	1.36214e+07	1.34616e+07	1.12533e+07	1.06331e+07	1.94574e+07	2.66359e+07	8.57112e+06	8.28947e+06	9.84561e+06
ZMO0818	7.4939e+08	8.0684e+08	6.4697e+08	6.39e+08	4.7756e+08	4.3912e+08	5.4536e+08	5.3862e+08	2.8387e+08	4.9273e+08	4.7278e+08	5.6617e+08	8.3891e+08	8.8422e+08	7.8592e+08	5.9854e+08	7.1961e+08	7.1927e+08	5.7607e+08	6.7646e+08	7.0966e+08	4.4862e+08	5.1398e+08	5.1197e+08
ZMO0819	1.317e+09	1.1213e+09	1.1489e+09	1.2333e+09	1.1948e+09	1.1851e+09	1.3272e+09	1.3073e+09	1.2116e+09	1.5259e+09	1.5239e+09	1.5514e+09	1.0063e+09	1.1917e+09	1.0308e+09	1.0544e+09	1.1026e+09	1.1262e+09	1.2001e+09	1.1136e+09	1.3147e+09	1.4467e+09	1.237e+09	1.5542e+09
ZMO0820	3.1269e+09	3.5771e+09	3.631e+09	3.4393e+09	3.1561e+09	3.6181e+09	3.3414e+09	3.0153e+09	3.5616e+09	3.1598e+09	3.4501e+09	3.1701e+09	3.6759e+09	3.9061e+09	4.211e+09	3.7536e+09	3.5588e+09	3.5566e+09	3.3421e+09	3.364e+09	3.5271e+09	3.7489e+09	3.8206e+09	3.6189e+09
ZMO0821	4.442e+08	4.4378e+08	5.4015e+08	5.2313e+08	5.0914e+08	6.0176e+08	5.1414e+08	6.5211e+08	6.9236e+08	7.4438e+08	8.0546e+08	7.3894e+08	4.4798e+08	4.9276e+08	5.0072e+08	6.3273e+08	5.3505e+08	5.4528e+08	7.1651e+08	5.4036e+08	6.3043e+08	7.9286e+08	7.7823e+08	8.1492e+08
ZMO0822	1.01847e+07	1.5638e+07	1.8191e+07	1.9006e+07	2.383e+07	2.2637e+07	2.268e+07	2.2189e+07	1.9322e+07	7.05572e+06	2.4055e+07	1.294e+07	2.5538e+07	1.3296e+07	1.4283e+07	2.9078e+07	1.2687e+07	2.0717e+07	2.8624e+07	3.0683e+07	1.5439e+07	9.45351e+06	2.36e+07	3.4388e+07
ZMO0823	3.5073e+08	3.4719e+08	3.4624e+08	3.2768e+08	3.2885e+08	2.9391e+08	2.9332e+08	2.8848e+08	2.676e+08	3.1899e+08	3.7583e+08	3.0504e+08	2.987e+08	2.5606e+08	3.4511e+08	3.2003e+08	2.6326e+08	3.0716e+08	3.0144e+08	2.9777e+08	3.4053e+08	3.9559e+08	3.3565e+08	3.6185e+08
ZMO0825	1.8709e+08	1.8421e+08	1.6751e+08	1.6541e+08	1.7523e+08	1.4785e+08	1.7079e+08	1.8807e+08	1.3882e+08	1.8082e+08	1.7714e+08	1.8435e+08	1.7242e+08	1.8536e+08	1.4462e+08	1.3647e+08	1.2973e+08	1.4348e+08	1.4594e+08	1.4662e+08	1.4449e+08	1.6035e+08	1.3895e+08	1.4726e+08
ZMO0826	7.6258e+08	8.5347e+08	7.5689e+08	7.4741e+08	7.2839e+08	6.7521e+08	6.849e+08	5.6456e+08	6.2622e+08	5.9009e+08	5.9109e+08	6.1675e+08	7.2029e+08	6.8137e+08	7.6053e+08	6.1388e+08	6.3306e+08	6.4522e+08	5.5473e+08	5.9231e+08	6.5281e+08	6.2362e+08	6.095e+08	6.677e+08
ZMO0827	5.8122e+08	7.1526e+08	6.5622e+08	6.0352e+08	5.9925e+08	5.5465e+08	5.4886e+08	5.7783e+08	5.7999e+08	6.3311e+08	7.2558e+08	6.356e+08	5.5837e+08	6.2998e+08	5.8637e+08	5.5133e+08	5.1662e+08	5.548e+08	5.8983e+08	5.3202e+08	6.4012e+08	6.632e+08	6.611e+08	6.8403e+08
ZMO0829	7.9084e+08	7.3562e+08	7.075e+08	7.4899e+08	7.7567e+08	6.9609e+08	7.3218e+08	6.0284e+08	7.3258e+08	6.4034e+08	6.1162e+08	6.5405e+08	6.8151e+08	6.8353e+08	7.3161e+08	6.9739e+08	6.9701e+08	7.2024e+08	5.9116e+08	6.8306e+08	6.7942e+08	5.8614e+08	7.5963e+08	6.2943e+08
ZMO0830	3.0526e+07	4.8153e+07	2.5985e+07	2.2603e+07	3.6425e+07	2.5381e+07	1.918e+07	2.7326e+07	1.9395e+07	2.3339e+07	1.7601e+07	1.422e+07	4.9028e+07	3.3618e+07	2.3507e+07	1.1572e+07	1.6615e+07	1.5003e+07	1.8519e+07	2.3265e+07	2.2896e+07	1.749e+07	1.7321e+07	1.6547e+07
ZMO0831	7.9756e+08	8.6419e+08	8.41001e+08	8.2176e+08	7.7947e+08	8.0647e+08	8.525e+08	8.7723e+08	8.9109e+08	8.93999e+08	9.6226e+08	8.3838e+08	7.5118e+08	9.0355e+08	8.8447e+08	7.8398e+08	7.603e+08	7.13e+08	7.8003e+08	7.6046e+08	7.2955e+08	8.8955e+08	9.0838e+08	8.9463e+08
ZMO0832	1.6078e+09	1.8762e+09	1.7035e+09	1.5546e+09	1.5253e+09	1.4501e+09	1.535e+09	1.6355e+09	1.4484e+09	1.7029e+09	1.849e+09	1.8263e+09	1.4944e+09	1.8285e+09	1.6414e+09	1.3904e+09	1.3575e+09	1.5241e+09	1.5149e+09	1.3878e+09	1.5829e+09	1.6059e+09	1.4694e+09	1.7901e+09
ZMO0833	1.5246e+09	1.4648e+09	1.5127e+09	1.287e+09	1.5181e+09	1.2674e+09	1.2196e+09	1.1584e+09	1.2359e+09	1.0898e+09	1.2569e+09	1.3202e+09	1.3736e+09	1.6253e+09	1.4149e+09	1.1298e+09	1.1898e+09	1.2896e+09	1.0612e+09	1.0748e+09	1.2749e+09	1.0771e+09	1.0902e+09	1.1603e+09
ZMO0834	1.1216e+09	1.2638e+09	9.2902e+08	8.9732e+08	9.9398e+08	7.7538e+08	8.7546e+08	7.4822e+08	7.3189e+08	7.3782e+08	6.8745e+08	7.7837e+08	9.22419e+08	6.7404e+08	8.3291e+08	7.7874e+08	8.4509e+08	7.8968e+08	6.3346e+08	7.4428e+08	8.1738e+08	7.4189e+08	7.6252e+08	8.2247e+08
ZMO0835	1.5638e+08	1.4697e+08	1.4277e+08	1.1876e+08	1.1262e+08	1.1071e+08	1.0759e+08	1.361e+08	1.0251e+08	1.3891e+08	1.1918e+08	1.266e+08	1.5092e+08	1.3145e+08	1.3435e+08	1.1408e+08	9.3604e+07	8.64369e+07	1.1037e+08	1.0134e+08	1.0977e+08	1.1626e+08	1.1723e+08	1.0712e+08
ZMO0836	3.093e+08	3.2856e+08	2.8808e+08	2.9462e+08	2.5807e+08	2.5312e+08	2.948e+08	3.0801e+08	2.5853e+08	3.3577e+08	3.3015e+08	3.2159e+08	3.0467e+08	2.4345e+08	2.7866e+08	2.4565e+08	2.6086e+08	2.5326e+08	2.8673e+08	2.7723e+08	2.7128e+08	3.2121e+08	2.8887e+08	2.8719e+08
ZMO0837	8.77801e+09	8.4316e+09	9.52011e+09	9.95691e+09	1.0033e+10	1.0527e+10	9.79351e+09	1.0278e+10	1.0312e+10	1.043e+10	1.2354e+10	1.1681e+10	7.1664e+09	7.93709e+09	8.16931e+09	9.0354e+09	8.71669e+09	9.134e+09	9.2067e+09	8.7794e+09	9.8217e+09	9.65301e+09	9.89989e+09	1.0434e+10
ZMO0840	8.0351e+08	8.2804e+08	6.0303e+08	6.1164e+08	6.6046e+08	5.3678e+08	4.9729e+08	5.6192e+08	4.6597e+08	2.512e+08	2.2732e+08	2.6181e+08	7.8081e+08	7.7124e+08	6.9845e+08	6.6774e+08	6.5063e+08	6.9588e+08	5.7233e+08	6.6483e+08	6.1038e+08	3.3149e+08	3.6154e+08	2.6084e+08
ZMO0841	1.17671e+07	1.12042e+07	1.11508e+07	1.1044e+07	6.45815e+06	8.39791e+06	2.87515e+07	5.5617e+06	3.21003e+07	1.66337e+07	2.4153e+07	5.31276e+06	8.4881e+06	3.03251e+07	1.99204e+07	7.44835e+06	6.31298e+06	5.34327e+06	1.30472e+07	2.24305e+07	1.02411e+07	6.07784e+06	2.4347e+07	2.2936e+07
ZMO0842	1.7022e+08	1.9246e+08	1.9139e+08	2.0783e+08	2.2765e+08	2.0771e+08	2.4003e+08	2.3068e+08	1.8879e+08	2.6937e+08	2.42e+08	2.4448e+08	2.1479e+08	1.8027e+08	1.9491e+08	2.3687e+08	2.4358e+08	2.244e+08	2.6063e+08	2.3799e+08	2.5115e+08	2.7195e+08	2.6502e+08	2.9348e+08
ZMO0843	3.6552e+09	4.0494e+09	3.9804e+09	3.5506e+09	3.5532e+09	3.593e+09	3.4013e+09	3.204e+09	3.4477e+09	3.0678e+09	2.9762e+09	2.9497e+09	3.9528e+09	3.8433e+09	4.1248e+09	3.634e+09	3.674e+09	3.7686e+09	3.3738e+09	3.3517e+09	3.3982e+09	2.7376e+09	3.4472e+09	2.9821e+09
ZMO0844	1.888e+09	1.8972e+09	1.8369e+09	1.9138e+09	1.9159e+09	1.8235e+09	2.1329e+09	2.293e+09	1.8294e+09	1.8905e+09	2.2392e+09	2.2952e+09	1.6743e+09	1.8046e+09	1.6468e+09	1.6734e+09	1.7262e+09	1.7928e+09	1.762e+09	2.0083e+09	2.111e+09	1.8592e+09	1.8291e+09	1.948e+09
ZMO0845	5.0663e+09	5.2686e+09	5.044e+09	3.8616e+09	3.6522e+09	3.9283e+09	3.8565e+09	3.6652e+09	3.85e+09	4.44359e+09	4.83481e+09	4.4193e+09	4.1082e+09	5.5708e+09	4.84811e+09	3.5294e+09	3.4101e+09	3.4187e+09	3.6234e+09	3.3888e+09	3.9036e+09	4.3035e+09	4.1808e+09	4.4948e+09
ZMO0846	3.908e+08	3.3429e+08	3.0007e+08	3.7832e+08	3.5038e+08	3.7308e+08	3.9707e+08	4.4647e+08	4.0563e+08	5.4682e+08	5.3368e+08	4.8837e+08	2.7156e+08	3.533e+08	2.8697e+08	2.9907e+08	3.3145e+08	3.228e+08	3.3519e+08	3.6783e+08	3.3004e+08	4.5868e+08	4.0063e+08	4.0766e+08
ZMO0847	1.1065e+09	9.1617e+08	1.0333e+09	7.1925e+08	6.1364e+08	6.6602e+08	6.4595e+08	7.0326e+08	6.215e+08	6.9113e+08	6.0764e+08	6.9002e+08	7.6111e+08	9.081e+08	8.6616e+08	5.3062e+08	5.4144e+08	5.3184e+08	4.9639e+08	5.3558e+08	5.307e+08	5.4343e+08	5.9947e+08	5.1418e+08
ZMO0850	9.4875e+07	9.76281e+07	6.8954e+07	6.3703e+07	5.9951e+07	5.4878e+07	6.26e+07	6.7107e+07	5.7963e+07	6.8777e+07	7.4031e+07	6.7713e+07	9.1663e+07	1.134e+08	9.6293e+07	7.1848e+07	6.1918e+07	7.9078e+07	8.8628e+07	6.6137e+07	8.1314e+07	9.5737e+07	7.3562e+07	1.0835e+08
ZMO0851	2.5954e+09	2.4307e+09	3.3265e+09	3.2374e+09	2.8696e+09	3.4181e+09	3.0844e+09	2.6855e+09	3.4628e+09	2.9883e+09	2.7568e+09	2.7891e+09	2.9039e+09	3.2881e+09	3.3891e+09	3.3841e+09	3.8164e+09	3.5332e+09	3.0999e+09	3.2133e+09	3.0206e+09	2.5066e+09	3.7726e+09	2.8005e+09
ZMO0852	5.2958e+08	5.2715e+08	5.3872e+08	4.6715e+08	4.6243e+08	4.3357e+08	4.1419e+08	4.4333e+08	4.5631e+08	5.9233e+08	5.6646e+08	5.3286e+08	5.2949e+08	4.9942e+08	4.9486e+08	4.6016e+08	4.3378e+08	4.4566e+08	4.5766e+08	4.2213e+08	4.9165e+08	5.592e+08	4.9504e+08	5.5869e+08
ZMO0853	5.3683e+08	5.9282e+08	6.2051e+08	5.0865e+08	4.9599e+08	4.9117e+08	4.2024e+08	4.0332e+08	4.1621e+08	2.1023e+08	1.7084e+08	2.0371e+08	5.9704e+08	7.0548e+08	5.3596e+08	4.9319e+08	4.9508e+08	4.7878e+08	3.6971e+08	4.2455e+08	3.5957e+08	2.205e+08	2.1315e+08	1.9561e+08
ZMO0854	1.024e+08	7.059e+07	8.0102e+07	7.1582e+07	7.285e+07	7.349e+07	7.4721e+07	7.413e+07	7.1955e+07	7.6406e+07	7.9461e+07	7.6209e+07	8.161e+07	7.9928e+07	7.2075e+07	7.9234e+07	7.164e+07	6.9246e+07	8.6086e+07	6.6175e+07	6.5897e+07	1.0042e+08	7.5944e+07	1.0154e+08
ZMO0855	3.3653e+09	3.3197e+09	3.5156e+09	3.2647e+09	3.2584e+09	3.6329e+09	3.0242e+09	2.8932e+09	3.4803e+09	2.8203e+09	2.8033e+09	2.9209e+09	2.8075e+09	3.9199e+09	3.5635e+09	3.2019e+09	3.2147e+09	3.2561e+09	2.8197e+09	2.9641e+09	2.9005e+09	2.575e+09	3.1107e+09	2.6892e+09
ZMO0856	2.559e+08	2.0166e+08	2.361e+08	2.2271e+08	2.2283e+08	2.0101e+08	2.4133e+08	1.7782e+08	2.059e+08	2.2687e+08	1.8469e+08	2.3245e+08	2.0303e+08	2.0111e+08	2.5317e+08	2.2827e+08	2.0058e+08	1.8195e+08	2.5168e+08	1.922e+08	2.2134e+08	1.9872e+08	2.0284e+08	1.9347e+08
ZMO0857	2.009e+09	2.3482e+09	2.2235e+09	1.8986e+09	1.7322e+09	1.9109e+09	1.7455e+09	1.9074e+09	1.8641e+09	1.5325e+09	1.7385e+09	1.6184e+09	2.2314e+09	1.8197e+09	1.9887e+09	1.8415e+09	1.9348e+09	1.8983e+09	1.6995e+09	1.8512e+09	1.3037e+09	1.7479e+09	1.5522e+09	1.9108e+09
ZMO0859	2.2044e+08	2.3341e+08	2.1911e+08	2.4715e+08	2.301e+08	2.2752e+08	2.3055e+08	2.0747e+08	2.4384e+08	2.1803e+08	1.7815e+08	2.0647e+08	2.3352e+08	2.2468e+08	2.1121e+08	2.2305e+08	2.333e+08	2.057e+08	2.1798e+08	2.0549e+08	2.1402e+08	1.6813e+08	2.1648e+08	1.801e+08
ZMO0860	6.8056e+07	1.6768e+08	3.3951e+07	9.30021e+06	8.1034e+07	2.236e+07	1.2166e+08	4.4755e+07	2.7839e+07	4.3962e+07	4.4104e+07	1.0688e+08	1.7831e+08	2.7653e+07	2.7818e+07	2.6425e+07	3.9616e+07	4.1242e+07	4.0425e+07	9.4598e+07	1.404e+08	4.7213e+07	2.7563e+07	3.4599e+07
ZMO0861	4.1464e+08	4.2365e+08	3.7968e+08	3.3416e+08	3.3776e+08	3.0655e+08	3.2554e+08	3.4292e+08	2.8784e+08	3.7668e+08	3.7457e+08	3.5918e+08	3.5986e+08	3.5635e+08	3.2848e+08	3.1282e+08	2.9079e+08	3.1801e+08	3.3256e+08	2.9346e+08	3.4431e+08	3.5638e+08	3.1978e+08	3.7676e+08
ZMO0862	8.5458e+08	7.4371e+08	1.0725e+09	1.2251e+09	1.182e+09	1.2943e+09	1.1561e+09	1.1091e+09	1.1612e+09	9.6465e+08	1.0149e+09	1.0349e+09	9.9622e+08	1.2088e+09	9.2783e+08	1.2786e+09	1.4643e+09	1.3815e+09	1.1772e+09	1.1746e+09	1.2026e+09	9.16739e+08	1.2117e+09	1.1051e+09
ZMO0863	3.8883e+08	4.553e+08	3.6378e+08	3.81e+08	3.9654e+08	3.574e+08	3.8972e+08	3.0964e+08	3.3949e+08	2.8276e+08	2.7268e+08	3.2639e+08	3.5992e+08	2.8018e+08	3.2881e+08	3.2057e+08	3.3351e+08	3.4619e+08	2.5674e+08	3.6306e+08	3.1607e+08	1.9378e+08	2.9694e+08	2.2887e+08
ZMO0864	3.6775e+07	3.166e+07	4.316e+07	2.7351e+07	4.1001e+07	5.7796e+07	2.8692e+07	3.2507e+07	6.0224e+07	2.7069e+07	4.0403e+07	2.7009e+07	3.4433e+07	3.9286e+07	5.7711e+07	5.4788e+07	5.7569e+07	4.4806e+07	4.5403e+07	4.0127e+07	2.8e+07	2.8659e+07	5.3501e+07	2.6367e+07
ZMO0865	5.3443e+08	5.0519e+08	5.3438e+08	3.9818e+08	4.026e+08	3.8685e+08	3.377e+08	3.5094e+08	3.0272e+08	4.0956e+08	3.8554e+08	3.6571e+08	4.9921e+08	6.0528e+08	4.886e+08	3.5451e+08	3.4617e+08	3.4355e+08	3.4681e+08	2.8746e+08	3.4267e+08	4.0906e+08	3.448e+08	3.8769e+08
ZMO0866	8.3437e+07	8.3157e+07	7.91286e+06	7.6332e+07	7.5678e+07	8.7871e+07	7.963e+07	8.0071e+07	6.1167e+07	9.6476e+07	6.4968e+07	7.5194e+07	8.7147e+07	1.2068e+08	5.1909e+07	5.1976e+07	9.1152e+07	7.9485e+07	7.85621e+07	6.2134e+07	7.9168e+07	8.8413e+07	8.7457e+07	7.0261e+07
ZMO0867	7.3211e+08	6.5138e+08	6.0929e+08	5.6667e+08	5.5655e+08	5.0592e+08	5.785e+08	5.2216e+08	4.7076e+08	6.5604e+08	6.8175e+08	6.0335e+08	7.0376e+08	7.206e+08	6.5695e+08	5.5654e+08	5.4718e+08	5.6684e+08	5.9474e+08	5.7783e+08	5.9323e+08	7.1104e+08	7.2033e+08	6.2225e+08
ZMO0868	1.1707e+07	1.1362e+07	9.5419e+06	5.6499e+06	5.2336e+06	5.2576e+06	6.8267e+06	4.1497e+06	3.7418e+06	3.9445e+06	4.5972e+06	4.9911e+06	8.75509e+06	2.7544e+07	9.8454e+06	4.6763e+06	3.9813e+06	4.8455e+06	8.8638e+06	4.1116e+06	5.1848e+06	5.7695e+06	4.5093e+06	1.073e+07
ZMO0869	9.31401e+08	7.8519e+08	8.442e+08	1.0318e+09	9.57811e+08	8.94479e+08	1.031e+09	8.9473e+08	8.55689e+08	9.6577e+08	8.9522e+08	8.843e+08	9.362e+08	6.7567e+08	8.6967e+08	1.0476e+09	1.0613e+09	1.0513e+09	9.3613e+08	1.0636e+09	8.5899e+08	9.578e+08	9.2712e+08	1.0243e+09
ZMO0870	7.2342e+08	6.4961e+08	6.267e+08	5.2426e+08	5.2852e+08	4.6393e+08	3.5785e+08	2.9936e+08	3.774e+08	3.2443e+08	2.6367e+08	3.5627e+08	7.1864e+08	7.3747e+08	6.0468e+08	4.2386e+08	4.2884e+08	3.9775e+08	2.8659e+08	3.2022e+08	2.9412e+08	3.208e+08	3.2832e+08	2.9617e+08
ZMO0871	2.5546e+08	2.4867e+08	2.636e+08	2.5065e+08	2.3477e+08	2.4343e+08	2.5781e+08	2.3866e+08	2.2578e+08	2.8687e+08	2.705e+08	2.3464e+08	2.7994e+08	3.1295e+08	2.6993e+08	2.522e+08	2.7242e+08	2.6761e+08	2.7269e+08	2.3391e+08	2.3315e+08	3.5887e+08	3.2392e+08	3.0407e+08
ZMO0872	1.0869e+08	9.6758e+07	1.1774e+08	1.1724e+08	9.67659e+07	1.0419e+08	1.1224e+08	1.0067e+08	1.1041e+08	1.1812e+08	1.0623e+08	1.0462e+08	9.8458e+07	8.3358e+07	1.0793e+08	9.89549e+07	1.116e+08	8.9064e+07	1.0629e+08	1.0436e+08	8.5963e+07	1.0227e+08	1.0018e+08	8.9817e+07
ZMO0873	6.6166e+07	4.3259e+07	5.3827e+07	6.2343e+07	7.0443e+07	4.9183e+07	6.1299e+07	6.6151e+07	5.4088e+07	6.3974e+07	5.9502e+07	7.1967e+07	5.5079e+07	5.0438e+07	4.6925e+07	5.2902e+07	5.5327e+07	5.7397e+07	6.8459e+07	6.3154e+07	7.3042e+07	7.5986e+07	5.7258e+07	7.1215e+07
ZMO0874	2.0335e+09	1.7021e+09	2.0341e+09	1.1564e+09	1.1644e+09	1.2189e+09	7.0447e+08	7.619e+08	7.9357e+08	7.2166e+08	7.3416e+08	8.2015e+08	1.6128e+09	1.9758e+09	1.8109e+09	8.3724e+08	7.6794e+08	7.3115e+08	5.4242e+08	4.1501e+08	5.5157e+08	6.5729e+08	4.6022e+08	5.7792e+08
ZMO0875	1.5667e+09	1.3737e+09	1.3502e+09	9.6623e+08	1.0309e+09	1.1396e+09	9.3536e+08	8.3753e+08	1.0124e+09	9.1707e+08	7.769e+08	9.8249e+08	1.4653e+09	1.707e+09	1.4735e+09	1.0917e+09	1.0455e+09	1.0677e+09	8.6552e+08	9.1165e+08	9.872e+08	9.4205e+08	1.0231e+09	9.0429e+08
ZMO0876	2.4187e+09	2.7224e+09	2.5399e+09	2.6202e+09	2.8981e+09	2.736e+09	1.9509e+09	1.9676e+09	1.9697e+09	5.6033e+08	6.5092e+08	5.4709e+08	3.233e+09	3.6288e+09	3.4002e+09	2.9373e+09	3.2652e+09	3.5688e+09	2.2106e+09	2.2371e+09	2.425e+09	6.7595e+08	5.1912e+08	5.3337e+08
ZMO0877	3.40235e+07	8.4683e+06	2.8593e+06	5.62793e+06	1.2632e+07	7.45423e+06	7.23475e+06	7.23895e+06	2.68699e+06	2.54037e+07	2.03773e+07	5.79184e+06	1.54302e+07	5.37635e+06	6.5037e+06	1.99214e+07	1.91952e+07	1.49891e+07	1.9147e+07	1.5261e+07	1.7737e+07	6.7995e+06	8.77918e+06	1.5524e+07
ZMO0878	8.8194e+08	1.056e+09	8.30601e+08	5.1635e+08	5.9701e+08	5.5105e+08	4.8868e+08	5.0042e+08	5.6337e+08	4.0597e+08	4.2697e+08	5.0125e+08	1.6106e+09	1.5199e+09	1.5863e+09	9.3073e+08	9.70481e+08	1.1046e+09	8.3813e+08	7.9355e+08	9.3221e+08	6.9311e+08	8.2185e+08	7.6046e+08
ZMO0880	2.9488e+07	3.6992e+07	3.9514e+07	3.0386e+07	3.542e+07	3.5993e+07	3.7935e+07	4.0244e+07	3.3826e+07	5.0123e+07	4.5776e+07	3.9829e+07	3.936e+07	2.6026e+07	3.6432e+07	3.6721e+07	3.3739e+07	3.4306e+07	4.6097e+07	3.1765e+07	3.8461e+07	4.9675e+07	4.3417e+07	4.3244e+07
ZMO0882	1.5543e+08	1.338e+08	1.1715e+08	1.1116e+08	1.0052e+08	1.138e+08	1.1468e+08	1.1414e+08	1.0196e+08	1.1313e+08	1.0758e+08	1.0262e+08	1.5248e+08	1.4107e+08	1.1821e+08	1.2468e+08	1.2094e+08	1.2216e+08	1.2539e+08	1.2221e+08	1.1124e+08	1.3375e+08	1.0876e+08	1.2454e+08
ZMO0883	1.4709e+10	1.506e+10	1.6043e+10	1.2857e+10	1.1546e+10	1.2576e+10	1.2714e+10	1.376e+10	1.2138e+10	1.3766e+10	1.441e+10	1.3978e+10	1.6069e+10	1.7329e+10	1.5902e+10	1.3879e+10	1.378e+10	1.4551e+10	1.4187e+10	1.4043e+10	1.417e+10	1.3791e+10	1.4207e+10	1.5384e+10
ZMO0884	5.96939e+09	6.0785e+09	5.53109e+09	4.6682e+09	5.2304e+09	4.7482e+09	5.0728e+09	4.90149e+09	5.06189e+09	5.0195e+09	5.9198e+09	5.5994e+09	5.6628e+09	7.50419e+09	5.7554e+09	5.1296e+09	5.1514e+09	5.11379e+09	5.0259e+09	5.5349e+09	6.04451e+09	4.74989e+09	5.6501e+09	6.07419e+09
ZMO0886	3.2048e+08	4.0233e+08	3.6388e+08	2.6791e+08	2.5793e+08	3.4677e+08	2.2572e+08	2.4368e+08	2.5825e+08	9.50069e+07	8.996e+07	8.2696e+07	3.4447e+08	3.3228e+08	3.8616e+08	3.3075e+08	3.7669e+08	3.4131e+08	2.7803e+08	2.7552e+08	2.5263e+08	1.0122e+08	7.2558e+07	7.8476e+07
ZMO0888	4.917e+08	6.5343e+08	4.5006e+08	5.8988e+08	5.6845e+08	5.5951e+08	5.4155e+08	7.4585e+08	5.2521e+08	8.115e+08	7.4609e+08	6.928e+08	5.0535e+08	5.3416e+08	4.4507e+08	6.7678e+08	6.1961e+08	7.4319e+08	7.2908e+08	5.5868e+08	6.9471e+08	1.0263e+09	7.2084e+08	1.0221e+09
ZMO0889	2.0359e+09	2.221e+09	1.8004e+09	3.1866e+09	3.4279e+09	2.8862e+09	3.317e+09	3.325e+09	3.0809e+09	1.611e+09	1.5519e+09	1.7141e+09	1.4779e+09	1.3349e+09	1.2537e+09	2.7179e+09	2.7235e+09	2.6013e+09	2.5331e+09	3.162e+09	3.075e+09	1.3619e+09	1.8179e+09	1.1486e+09
ZMO0890	3.9942e+09	4.3001e+09	4.2472e+09	3.5495e+09	3.5462e+09	3.5407e+09	3.4537e+09	3.736e+09	3.4118e+09	4.2929e+09	4.51299e+09	4.2722e+09	3.8519e+09	4.49509e+09	4.1909e+09	3.404e+09	3.4012e+09	3.6103e+09	3.7568e+09	3.5864e+09	4.2914e+09	4.56579e+09	4.2687e+09	4.718e+09
ZMO0892	5.2076e+07	5.1893e+07	4.8483e+07	7.1234e+07	6.8292e+07	6.9749e+07	7.2969e+07	6.9652e+07	7.4086e+07	8.849e+07	7.7151e+07	8.815e+07	6.5533e+07	6.9635e+07	6.3511e+07	8.1747e+07	6.1313e+07	6.305e+07	7.9214e+07	5.982e+07	7.0596e+07	8.4878e+07	7.8483e+07	8.4907e+07
ZMO0893	9.22669e+07	8.7457e+07	7.394e+07	1.0155e+08	1.2012e+08	1.0209e+08	1.1226e+08	1.0836e+08	1.126e+08	1.0188e+08	9.8094e+07	9.8353e+07	9.65539e+07	8.025e+07	9.0078e+07	1.0261e+08	1.1139e+08	1.1323e+08	1.1366e+08	1.1152e+08	1.2419e+08	1.1237e+08	1.0593e+08	9.4224e+07
ZMO0894	1.0104e+08	1.0759e+08	1.0265e+08	8.846e+07	8.21631e+07	8.7935e+07	9.6097e+07	9.2916e+07	7.9119e+07	1.0141e+08	9.8648e+07	8.383e+07	1.2264e+08	1.2288e+08	1.1754e+08	9.48441e+07	8.96271e+07	8.9268e+07	9.0397e+07	9.2657e+07	7.9722e+07	1.0213e+08	1.0442e+08	9.3922e+07
ZMO0895	5.4449e+07	6.3106e+07	2.2454e+07	3.7391e+07	4.3799e+07	1.5372e+08	2.9778e+07	7.76244e+06	5.4767e+07	6.7793e+07	4.4865e+07	3.3521e+07	3.9055e+07	1.3478e+08	8.692e+07	8.8689e+07	4.7496e+07	6.5293e+07	9.7357e+07	4.1616e+07	6.7173e+07	7.4951e+07	8.7558e+07	5.7254e+07
ZMO0896	4.8282e+08	5.6031e+08	5.4471e+08	4.0062e+08	3.877e+08	4.2507e+08	3.7565e+08	3.5582e+08	4.0159e+08	3.5214e+08	3.6018e+08	3.7356e+08	5.7891e+08	6.1227e+08	5.6259e+08	4.5925e+08	4.4642e+08	4.7466e+08	4.0842e+08	3.8936e+08	3.9891e+08	4.3946e+08	4.2154e+08	3.7997e+08
ZMO0899	3.6914e+08	4.2449e+08	3.4018e+08	3.5952e+08	3.6618e+08	3.3965e+08	3.4923e+08	2.915e+08	3.4343e+08	2.6536e+08	2.8216e+08	3.1812e+08	3.7701e+08	4.1626e+08	3.4833e+08	3.0703e+08	3.2262e+08	3.096e+08	2.997e+08	3.155e+08	3.303e+08	2.6115e+08	3.1882e+08	2.6491e+08
ZMO0900	1.4298e+09	1.464e+09	1.3235e+09	1.3525e+09	1.3783e+09	1.3088e+09	1.386e+09	1.1571e+09	1.4432e+09	1.3047e+09	1.1432e+09	1.2956e+09	1.3753e+09	1.4812e+09	1.4449e+09	1.2974e+09	1.2954e+09	1.238e+09	1.1825e+09	1.2726e+09	1.3259e+09	1.0533e+09	1.2777e+09	1.0151e+09
ZMO0903	5.47641e+09	5.3337e+09	5.306e+09	4.1027e+09	4.4992e+09	4.1035e+09	4.0984e+09	4.066e+09	4.2121e+09	4.2624e+09	4.8407e+09	4.743e+09	5.198e+09	6.6129e+09	5.4606e+09	4.3386e+09	4.6331e+09	5.0576e+09	4.6445e+09	5.0391e+09	5.96469e+09	5.92571e+09	5.81239e+09	6.54111e+09
ZMO0904	1.4545e+08	1.4429e+08	1.3699e+08	1.838e+08	1.6783e+08	1.4634e+08	1.9749e+08	1.7979e+08	1.4867e+08	1.5856e+08	1.3783e+08	1.4514e+08	1.862e+08	1.4134e+08	1.6095e+08	1.6957e+08	1.6872e+08	1.8135e+08	1.7562e+08	1.9301e+08	1.901e+08	1.4963e+08	1.6219e+08	1.4485e+08
ZMO0905	8.03161e+09	6.5781e+09	8.9156e+09	8.66971e+09	7.773e+09	8.98791e+09	7.2121e+09	6.53509e+09	7.98171e+09	4.2071e+09	3.3192e+09	4.1449e+09	7.2937e+09	7.6439e+09	9.21059e+09	7.4517e+09	8.41121e+09	7.9309e+09	6.06e+09	7.933e+09	6.31629e+09	3.4064e+09	5.5836e+09	3.3651e+09
ZMO0907	1.9559e+08	1.9098e+08	1.6713e+08	1.5074e+08	1.2636e+08	1.4156e+08	1.3088e+08	1.2485e+08	1.2678e+08	1.7342e+08	1.242e+08	1.2015e+08	1.6408e+08	2.2958e+08	1.5995e+08	1.1954e+08	1.2463e+08	1.1689e+08	1.0482e+08	1.0898e+08	9.6586e+07	1.4103e+08	1.2692e+08	1.2014e+08
ZMO0908	9.7804e+08	1.0435e+09	8.5384e+08	8.3549e+08	8.9335e+08	7.8503e+08	8.21529e+08	1.0249e+09	7.5894e+08	1.1163e+09	1.0959e+09	1.1023e+09	8.5442e+08	1.0951e+09	8.86919e+08	7.5149e+08	7.8154e+08	7.7761e+08	8.2921e+08	8.9358e+08	9.6415e+08	1.0666e+09	8.97631e+08	1.0621e+09
ZMO0909	2.8303e+08	3.4129e+08	2.8451e+08	3.6585e+08	3.4744e+08	3.386e+08	3.55e+08	4.3186e+08	3.4482e+08	4.2629e+08	4.7216e+08	4.2158e+08	3.0843e+08	2.753e+08	3.1502e+08	3.7514e+08	3.5066e+08	4.033e+08	4.0188e+08	3.5992e+08	4.108e+08	5.0139e+08	4.498e+08	4.7691e+08
ZMO0910	4.7987e+08	4.2644e+08	5.2821e+08	7.3532e+08	6.3003e+08	6.3839e+08	6.8869e+08	7.3533e+08	6.988e+08	1.0069e+09	9.0435e+08	8.1173e+08	4.6759e+08	5.9212e+08	6.3019e+08	7.3077e+08	6.9987e+08	7.867e+08	8.1751e+08	7.514e+08	8.14099e+08	9.8908e+08	9.3667e+08	9.6626e+08
ZMO0911	3.825e+09	3.8955e+09	4.1258e+09	3.5814e+09	3.6255e+09	3.5062e+09	3.5443e+09	4.084e+09	3.2313e+09	3.8602e+09	3.7929e+09	3.5642e+09	3.7648e+09	4.308e+09	3.9066e+09	3.3697e+09	3.3331e+09	3.1686e+09	3.2202e+09	3.6627e+09	3.1101e+09	3.5662e+09	3.5202e+09	3.5169e+09
ZMO0912	1.2605e+08	1.3442e+08	1.5314e+08	1.0214e+08	9.61831e+07	1.2105e+08	8.0968e+07	8.3574e+07	9.93969e+07	5.3369e+07	4.3155e+07	5.1594e+07	8.1771e+07	1.0193e+08	8.4435e+07	6.2333e+07	7.1155e+07	5.3503e+07	5.1513e+07	5.4324e+07	3.7378e+07	2.9954e+07	3.3533e+07	1.9472e+07
ZMO0913	4.109e+09	4.59901e+09	4.2467e+09	5.03741e+09	4.60881e+09	4.61729e+09	4.9214e+09	4.2076e+09	4.5863e+09	4.32611e+09	4.3892e+09	4.5835e+09	4.7837e+09	3.7297e+09	4.6455e+09	5.2199e+09	5.5481e+09	5.4184e+09	4.8603e+09	5.3284e+09	5.547e+09	5.03209e+09	5.6394e+09	5.3991e+09
ZMO0914	1.5669e+09	1.5931e+09	1.8706e+09	2.3203e+09	2.2299e+09	2.4271e+09	2.2409e+09	2.2594e+09	2.6499e+09	2.3006e+09	2.5815e+09	1.9701e+09	1.9787e+09	2.1418e+09	2.3628e+09	2.82e+09	2.7027e+09	2.5904e+09	2.5734e+09	2.6702e+09	2.4314e+09	3.0451e+09	3.0818e+09	3.0261e+09
ZMO0915	1.3013e+08	1.5954e+08	1.2889e+08	1.62e+08	1.5195e+08	1.3431e+08	1.5712e+08	1.8997e+08	1.3582e+08	1.716e+08	1.8881e+08	1.648e+08	1.7123e+08	1.6465e+08	1.4684e+08	1.7199e+08	1.8095e+08	1.7295e+08	1.8559e+08	1.9821e+08	1.9455e+08	2.2452e+08	2.0753e+08	2.1255e+08
ZMO0916	5.0411e+08	4.6043e+08	5.2121e+08	7.6672e+08	8.4237e+08	7.5313e+08	7.7247e+08	6.8663e+08	8.495e+08	8.2873e+08	8.2455e+08	8.4131e+08	5.305e+08	5.8753e+08	7.0331e+08	8.4504e+08	8.3503e+08	9.2038e+08	8.82361e+08	8.7148e+08	9.5784e+08	8.25539e+08	9.7571e+08	9.03519e+08
ZMO0917	1.5837e+09	1.5579e+09	1.8894e+09	1.7148e+09	1.6473e+09	1.6593e+09	1.5748e+09	1.6933e+09	1.6513e+09	1.9609e+09	2.1017e+09	1.9195e+09	1.7695e+09	1.9157e+09	1.9735e+09	1.7418e+09	1.7589e+09	1.8211e+09	1.8946e+09	1.7075e+09	1.8469e+09	2.2139e+09	1.9565e+09	2.1722e+09
ZMO0918	5.007e+09	4.818e+09	5.2403e+09	8.07791e+09	7.80841e+09	7.6734e+09	9.22129e+09	8.12469e+09	9.00251e+09	8.28589e+09	8.3369e+09	9.10569e+09	5.1843e+09	5.994e+09	5.9729e+09	8.2549e+09	9.1802e+09	9.3185e+09	8.81319e+09	9.9426e+09	1.0023e+10	7.4876e+09	9.67181e+09	7.9909e+09
ZMO0919	1.5069e+08	1.42e+08	1.2997e+08	1.5548e+08	1.4608e+08	1.4381e+08	1.676e+08	2.0557e+08	1.5223e+08	1.9213e+08	2.0868e+08	1.9205e+08	1.3484e+08	1.2593e+08	1.2702e+08	1.4539e+08	1.5025e+08	1.5499e+08	1.6193e+08	1.6284e+08	1.5542e+08	1.8733e+08	1.5627e+08	1.6187e+08
ZMO0920	6.2084e+08	6.6355e+08	5.9179e+08	7.4861e+08	8.6651e+08	7.919e+08	7.2125e+08	7.704e+08	6.5087e+08	4.2074e+08	4.1944e+08	3.4869e+08	3.7899e+08	5.1488e+08	4.0339e+08	7.0655e+08	6.598e+08	7.5589e+08	6.0856e+08	5.8053e+08	5.5327e+08	2.5273e+08	2.3127e+08	1.9063e+08
ZMO0921	3.2895e+08	3.6853e+08	2.9581e+08	3.1399e+08	3.5958e+08	3.1818e+08	2.6263e+08	3.2508e+08	2.7999e+08	1.6364e+08	1.8276e+08	1.5673e+08	3.4399e+08	3.3799e+08	3.7322e+08	3.3313e+08	3.1674e+08	3.062e+08	2.9012e+08	3.2882e+08	2.9996e+08	2.1325e+08	2.4632e+08	1.9411e+08
ZMO0922	1.0181e+08	8.7591e+07	9.1915e+07	9.7752e+07	9.4111e+07	1.1089e+08	1.0007e+08	9.5448e+07	8.9209e+07	1.1006e+08	1.4885e+08	9.1264e+07	9.0374e+07	8.4207e+07	1.0602e+08	1.036e+08	9.84371e+07	9.1911e+07	9.9946e+07	9.0808e+07	1.0723e+08	1.1856e+08	9.7972e+07	1.2892e+08
ZMO0923	1.5527e+09	1.5294e+09	1.6177e+09	1.7843e+09	1.7916e+09	1.7139e+09	1.7266e+09	1.6856e+09	1.718e+09	1.5157e+09	1.4807e+09	1.6296e+09	1.798e+09	1.6747e+09	1.6406e+09	1.6973e+09	1.9044e+09	1.8811e+09	1.782e+09	1.8512e+09	2.0007e+09	1.3727e+09	1.6681e+09	1.6492e+09
ZMO0924	5.3976e+09	5.361e+09	5.1783e+09	5.4741e+09	5.46879e+09	5.1291e+09	5.6794e+09	6.4869e+09	5.2117e+09	6.78179e+09	6.96441e+09	6.71319e+09	4.73929e+09	5.2442e+09	4.7102e+09	4.8112e+09	4.8908e+09	5.1037e+09	5.5263e+09	5.7923e+09	6.1789e+09	6.50069e+09	6.1018e+09	6.7028e+09
ZMO0925	1.9532e+07	2.2568e+07	1.8043e+07	1.2291e+07	1.3407e+07	1.6408e+07	1.7526e+07	1.3859e+07	1.6614e+07	1.6976e+07	1.9186e+07	1.8694e+07	7.6866e+06	7.4797e+06	9.3481e+06	1.2556e+07	1.0928e+07	9.799e+06	1.0727e+07	9.1821e+06	9.82459e+06	1.2449e+07	1.2128e+07	9.1734e+06
ZMO0926	3.3419e+08	3.222e+08	2.4743e+08	2.5088e+08	2.035e+08	1.8925e+08	2.2437e+08	2.6789e+08	2.0011e+08	3.0862e+08	2.2641e+08	3.0227e+08	3.1884e+08	2.1704e+08	2.6938e+08	1.6686e+08	2.4668e+08	2.4648e+08	2.2769e+08	2.9754e+08	2.0475e+08	3.4194e+08	2.5871e+08	3.334e+08
ZMO0927	1.7064e+08	1.9067e+08	1.7436e+08	2.3014e+08	2.0313e+08	2.0536e+08	2.2357e+08	2.2956e+08	2.1733e+08	3.014e+08	3.3219e+08	2.8752e+08	2.1954e+08	2.0961e+08	1.9712e+08	2.0346e+08	2.5344e+08	2.4105e+08	2.8995e+08	2.7692e+08	2.6514e+08	3.3569e+08	3.1852e+08	3.2603e+08
ZMO0928	5.8644e+07	5.9552e+07	6.5345e+07	7.0503e+07	6.4595e+07	5.9732e+07	6.7027e+07	5.6625e+07	6.1936e+07	5.8105e+07	4.3117e+07	7.1539e+07	6.5171e+07	5.5815e+07	4.7663e+07	6.7268e+07	7.2599e+07	6.2359e+07	5.0162e+07	7.9171e+07	7.0527e+07	4.3684e+07	6.2326e+07	5.2777e+07
ZMO0935	1.817e+09	1.6785e+09	1.6118e+09	2.3669e+09	2.5529e+09	2.2659e+09	2.5552e+09	2.4774e+09	2.4735e+09	2.3141e+09	2.2555e+09	2.1902e+09	1.9586e+09	2.4106e+09	1.9936e+09	2.8612e+09	3.0063e+09	3.3337e+09	2.8868e+09	2.9519e+09	2.6094e+09	2.4548e+09	2.8567e+09	2.7561e+09
ZMO0937	6.7509e+08	6.5311e+08	6.7914e+08	7.97001e+08	8.2216e+08	8.7348e+08	7.87271e+08	7.6591e+08	8.498e+08	7.6803e+08	7.5362e+08	8.42449e+08	5.4765e+08	6.3233e+08	5.1783e+08	6.9725e+08	6.0619e+08	6.851e+08	6.8709e+08	5.7399e+08	7.1908e+08	7.4402e+08	6.4097e+08	7.8199e+08
ZMO0938	5.5041e+08	6.0508e+08	6.8808e+08	6.707e+08	6.697e+08	6.5627e+08	5.602e+08	5.8101e+08	5.5809e+08	3.7259e+08	2.8254e+08	3.666e+08	5.8548e+08	6.9372e+08	5.7009e+08	4.8709e+08	5.8195e+08	5.2784e+08	4.4197e+08	5.9534e+08	4.352e+08	2.7902e+08	4.1446e+08	2.5286e+08
ZMO0939	1.0113e+08	1.016e+08	1.0182e+08	1.0281e+08	1.0034e+08	1.1527e+08	1.0368e+08	9.1965e+07	1.1264e+08	1.0668e+08	9.4458e+07	9.0496e+07	1.0318e+08	1.0843e+08	1.1039e+08	1.1166e+08	1.0872e+08	1.0946e+08	1.0809e+08	9.0377e+07	9.2447e+07	1.0237e+08	1.0771e+08	9.1543e+07
ZMO0940	8.7379e+07	9.91741e+07	1.0145e+08	1.0884e+08	1.2205e+08	1.1347e+08	1.0532e+08	1.227e+08	1.2264e+08	1.3761e+08	1.6704e+08	1.17e+08	1.0532e+08	1.1183e+08	1.1265e+08	1.2866e+08	1.3317e+08	1.2649e+08	1.5565e+08	1.112e+08	1.2112e+08	2.2004e+08	1.4088e+08	2.0592e+08
ZMO0941	8.9447e+07	1.0693e+08	9.30371e+07	1.0062e+08	9.1639e+07	9.5426e+07	9.6076e+07	9.7796e+07	9.3285e+07	1.1659e+08	1.1189e+08	8.4907e+07	9.4662e+07	8.0547e+07	1.0486e+08	1.1201e+08	1.0199e+08	9.9712e+07	1.0407e+08	8.713e+07	1.0121e+08	1.4066e+08	1.1497e+08	1.3319e+08
ZMO0942	4.3937e+08	3.9357e+08	3.4261e+08	4.4277e+08	4.6352e+08	4.087e+08	4.844e+08	4.4152e+08	4.7538e+08	4.6361e+08	4.0338e+08	4.6706e+08	3.6654e+08	4.0006e+08	4.1507e+08	4.454e+08	4.7695e+08	4.8101e+08	4.6545e+08	4.9792e+08	5.3331e+08	3.8756e+08	4.7928e+08	4.1207e+08
ZMO0945	1.2187e+09	1.3682e+09	1.413e+09	1.5331e+09	1.4852e+09	1.7007e+09	1.4882e+09	1.2732e+09	1.5491e+09	1.2781e+09	1.1748e+09	1.3919e+09	1.4995e+09	1.8751e+09	1.8773e+09	1.7879e+09	1.927e+09	1.85e+09	1.6398e+09	1.767e+09	1.6897e+09	1.3942e+09	1.9031e+09	1.4256e+09
ZMO0946	2.0835e+10	2.3032e+10	2.4513e+10	2.0602e+10	1.9615e+10	2.1962e+10	2.0085e+10	2.038e+10	2.1274e+10	1.9941e+10	1.9778e+10	2.0246e+10	2.1696e+10	2.2767e+10	2.5073e+10	2.1416e+10	2.0698e+10	2.0748e+10	1.9724e+10	2.0594e+10	1.8967e+10	1.6634e+10	2.0561e+10	1.7196e+10
ZMO0947	7.9228e+06	9.2944e+06	1.0269e+07	1.02659e+07	1.1176e+07	5.5504e+06	7.105e+06	7.8516e+06	6.6206e+06	9.4333e+06	8.1183e+06	7.6841e+06	8.9131e+06	1.4073e+07	7.2801e+06	6.1493e+06	6.3424e+06	4.8645e+06	7.9316e+06	7.2322e+06	7.7331e+06	1.4607e+07	4.51609e+06	6.906e+06
ZMO0948	2.8473e+09	3.3598e+09	2.5802e+09	2.6062e+09	2.9621e+09	2.8398e+09	2.7245e+09	2.6896e+09	2.7884e+09	2.7069e+09	2.9229e+09	3.0363e+09	2.6768e+09	3.2663e+09	2.7288e+09	2.6136e+09	2.7262e+09	2.9719e+09	2.9278e+09	2.738e+09	3.5121e+09	2.8747e+09	2.921e+09	3.1249e+09
ZMO0949	3.4976e+09	3.5824e+09	3.8324e+09	2.8883e+09	3.1697e+09	3.356e+09	2.6286e+09	2.6419e+09	2.8702e+09	2.5184e+09	2.5727e+09	2.8256e+09	3.4033e+09	4.4138e+09	3.5736e+09	2.8135e+09	2.8838e+09	2.833e+09	2.5537e+09	2.527e+09	2.7387e+09	2.1231e+09	2.346e+09	2.0159e+09
ZMO0950	2.8798e+07	2.0934e+07	2.4098e+07	3.2419e+07	3.0877e+07	3.2601e+07	3.1993e+07	2.7671e+07	2.867e+07	2.9327e+07	3.9175e+07	3.1787e+07	1.9024e+07	2.0472e+07	2.5662e+07	2.4922e+07	2.4398e+07	2.4642e+07	2.5933e+07	2.3144e+07	1.9451e+07	3.0234e+07	2.6987e+07	2.7548e+07
ZMO0951	1.5064e+08	1.6614e+08	2.1177e+08	1.985e+08	2.0002e+08	2.1427e+08	1.8376e+08	2.3555e+08	2.2167e+08	2.6451e+08	3.0733e+08	2.1432e+08	1.5587e+08	1.8973e+08	1.7777e+08	2.1743e+08	1.7003e+08	2.045e+08	2.0304e+08	1.3587e+08	1.5998e+08	2.773e+08	2.1209e+08	2.6288e+08
ZMO0952	5.8755e+07	4.8245e+07	6.4817e+07	6.7179e+07	7.8155e+07	7.2843e+07	6.5859e+07	7.7349e+07	8.1198e+07	1.1111e+08	9.88929e+07	6.6943e+07	5.8038e+07	4.2441e+07	4.394e+07	7.0331e+07	7.5905e+07	6.7555e+07	6.7401e+07	7.7297e+07	7.0436e+07	9.3282e+07	7.4813e+07	9.2445e+07
ZMO0956	5.557e+07	5.2632e+07	5.2669e+07	5.8497e+07	5.6632e+07	4.621e+07	5.4521e+07	5.8866e+07	4.6095e+07	5.1262e+07	3.9798e+07	4.6006e+07	3.6125e+07	2.9886e+07	3.5517e+07	4.2984e+07	4.0576e+07	3.68e+07	3.8708e+07	4.3228e+07	3.9816e+07	3.4993e+07	4.1978e+07	2.5691e+07
ZMO0957	1.0635e+07	1.0483e+07	1.4368e+07	1.145e+07	9.97029e+06	1.2837e+07	1.2947e+07	1.3439e+07	1.4821e+07	2.2564e+07	1.7571e+07	1.4831e+07	1.0586e+07	1.5315e+07	1.1466e+07	1.3968e+07	1.2483e+07	1.1826e+07	1.2123e+07	1.303e+07	9.9889e+06	1.3781e+07	1.4243e+07	1.4495e+07
ZMO0958	5.8647e+07	8.0637e+07	5.7714e+07	6.3161e+07	8.1891e+07	6.8598e+07	7.1918e+07	9.0394e+07	6.3129e+07	7.0586e+07	8.2879e+07	7.5514e+07	1.0364e+08	9.1683e+07	6.993e+07	8.6481e+07	7.4679e+07	8.0208e+07	8.18579e+07	8.9725e+07	9.1634e+07	9.7238e+07	8.887e+07	7.9082e+07
ZMO0961	5.8283e+07	9.0559e+07	7.2917e+07	5.0377e+07	3.6357e+07	5.0637e+07	2.7823e+07	3.5609e+07	2.4831e+07	1.045e+07	6.0533e+06	9.166e+06	6.2883e+07	9.517e+07	7.1163e+07	5.4424e+07	5.8229e+07	4.8937e+07	4.482e+07	3.4081e+07	2.3273e+07	7.7596e+06	6.3499e+06	6.0456e+06
ZMO0962	3.43e+08	3.1725e+08	3.5005e+08	3.3212e+08	3.1733e+08	3.41e+08	2.9511e+08	2.6304e+08	2.9173e+08	2.9989e+08	2.4967e+08	3.0689e+08	3.5973e+08	3.4617e+08	3.3265e+08	3.4917e+08	3.5016e+08	3.3135e+08	2.8482e+08	3.2129e+08	3.4266e+08	3.0257e+08	3.3344e+08	2.9938e+08
ZMO0963	3.0056e+08	2.977e+08	2.4735e+08	2.6715e+08	3.3119e+08	2.7839e+08	2.781e+08	2.9749e+08	2.6045e+08	3.4069e+08	3.7288e+08	3.0827e+08	3.2692e+08	3.6285e+08	2.7989e+08	3.042e+08	3.1712e+08	3.6184e+08	3.3798e+08	3.088e+08	3.9989e+08	4.4557e+08	3.2683e+08	4.3043e+08
ZMO0964	1.2416e+09	1.2155e+09	1.3787e+09	1.0596e+09	1.0115e+09	1.2664e+09	1.0969e+09	1.4082e+09	9.9549e+08	1.4327e+09	1.2679e+09	1.2052e+09	1.4422e+09	1.6885e+09	1.3277e+09	1.3025e+09	1.238e+09	1.2568e+09	1.3e+09	1.1088e+09	1.0656e+09	1.571e+09	1.2426e+09	1.4518e+09
ZMO0965	1.7733e+09	1.8735e+09	1.6192e+09	1.4578e+09	1.6259e+09	1.593e+09	1.5421e+09	2.042e+09	1.6391e+09	1.7509e+09	1.9033e+09	2.0636e+09	1.8172e+09	2.0264e+09	1.8318e+09	1.632e+09	1.5244e+09	1.6741e+09	1.6423e+09	1.773e+09	1.8486e+09	1.9422e+09	1.844e+09	1.8032e+09
ZMO0966	3.8598e+07	6.7112e+06	3.7325e+07	1.86136e+07	4.0898e+07	3.0195e+07	2.07003e+07	1.02725e+07	3.81533e+06	1.12652e+07	6.2304e+07	1.05976e+07	5.0901e+07	7.99045e+06	4.1798e+07	4.1423e+07	1.83494e+07	8.19284e+06	3.667e+07	8.70033e+06	1.48055e+07	2.905e+07	4.0734e+07	6.24566e+06
ZMO0970	1.8162e+08	1.3229e+08	1.5628e+08	1.2327e+08	1.3388e+08	1.2582e+08	9.874e+07	1.0095e+08	1.0968e+08	6.3247e+07	4.5385e+07	4.4285e+07	1.3038e+08	8.8212e+07	1.1131e+08	1.0011e+08	9.7921e+07	1.0212e+08	8.2628e+07	8.3981e+07	8.2515e+07	3.4576e+07	5.5354e+07	4.0405e+07
ZMO0971	8.2123e+08	7.9418e+08	6.9709e+08	6.5337e+08	6.6353e+08	6.4367e+08	5.936e+08	5.881e+08	6.4051e+08	5.7762e+08	5.5179e+08	5.4123e+08	7.5887e+08	6.9368e+08	7.046e+08	6.8038e+08	7.1478e+08	7.0916e+08	5.6685e+08	6.2079e+08	6.13e+08	5.0302e+08	6.4824e+08	5.742e+08
ZMO0972	1.5126e+07	1.4788e+07	1.8284e+07	1.053e+07	1.2941e+07	1.3046e+07	1.1958e+07	1.1875e+07	1.1519e+07	1.584e+07	1.4226e+07	1.4165e+07	1.5078e+07	2.5119e+07	1.6646e+07	1.3567e+07	1.3611e+07	1.4426e+07	1.0337e+07	1.2712e+07	1.0266e+07	1.8901e+07	1.06696e+07	1.7466e+07
ZMO0973	4.9533e+09	5.03679e+09	4.99391e+09	4.2509e+09	3.7081e+09	4.3072e+09	4.1923e+09	4.1722e+09	4.3626e+09	4.9298e+09	4.8309e+09	4.6701e+09	4.61319e+09	5.9245e+09	4.5921e+09	3.7995e+09	4.1892e+09	4.0182e+09	4.1649e+09	4.0032e+09	3.9948e+09	4.7825e+09	4.8202e+09	4.6076e+09
ZMO0974	9.5633e+08	9.89011e+08	8.8557e+08	1.1045e+09	1.0135e+09	1.0809e+09	1.0678e+09	9.7366e+08	1.0106e+09	9.0351e+08	7.97989e+08	8.4881e+08	9.6328e+08	1.0696e+09	9.0021e+08	9.5964e+08	1.0603e+09	1.0351e+09	8.431e+08	9.4555e+08	9.0171e+08	7.7829e+08	9.1117e+08	7.4347e+08
ZMO0975	1.5237e+07	1.4112e+07	1.3397e+07	1.0657e+07	7.1987e+06	8.6636e+06	1.2929e+07	1.0406e+07	8.4036e+06	1.2062e+07	8.1118e+06	9.0805e+06	1.4587e+07	1.5563e+07	1.2756e+07	1.0728e+07	9.0775e+06	1.0944e+07	1.0173e+07	1.0024e+07	9.1533e+06	1.0421e+07	1.1721e+07	9.01631e+06
ZMO0976	4.9041e+08	6.1569e+08	5.616e+08	8.1325e+08	9.295e+08	8.8537e+08	1.4105e+09	1.4242e+09	1.4522e+09	1.7909e+09	1.7583e+09	1.7114e+09	6.7535e+08	5.8339e+08	8.0904e+08	1.1112e+09	1.0807e+09	1.3327e+09	1.527e+09	1.5348e+09	1.6311e+09	1.8373e+09	1.7562e+09	1.9781e+09
ZMO0978	1.0795e+07	1.0783e+07	1.4073e+07	1.0449e+07	9.7514e+06	1.4176e+07	9.2784e+06	8.6379e+06	9.9035e+06	4.9365e+06	7.2178e+06	6.426e+06	1.5781e+07	1.3358e+07	1.6281e+07	1.0283e+07	1.2576e+07	1.0234e+07	8.3514e+06	8.7826e+06	8.7176e+06	6.2242e+06	4.167e+06	3.744e+06
ZMO0979	1.2768e+08	6.5311e+07	5.8181e+07	3.5685e+07	2.7279e+07	2.4296e+07	3.2776e+07	3.4352e+07	1.8131e+07	5.3686e+07	2.7834e+07	3.1686e+07	1.7197e+07	1.1969e+07	1.2702e+07	5.635e+06	2.4715e+07	5.333e+06	1.1151e+07	7.8925e+06	4.0418e+06	6.5575e+06	6.0434e+06	6.1029e+06
ZMO0980	3.6233e+09	3.4656e+09	3.2096e+09	3.1161e+09	3.5154e+09	3.2424e+09	3.2025e+09	3.3761e+09	3.1334e+09	3.3835e+09	3.6853e+09	3.4703e+09	3.3291e+09	3.9322e+09	3.1729e+09	3.4354e+09	3.4099e+09	3.6727e+09	3.481e+09	3.1858e+09	3.7985e+09	3.748e+09	3.631e+09	4.2222e+09
ZMO0981	7.31e+07	7.6385e+07	7.2105e+07	6.9445e+07	6.9931e+07	5.6963e+07	6.9774e+07	6.8165e+07	5.743e+07	7.6105e+07	7.6452e+07	7.4835e+07	8.1895e+07	9.10699e+07	8.483e+07	7.7337e+07	6.9285e+07	7.3169e+07	7.4009e+07	6.9992e+07	7.5561e+07	9.4399e+07	6.2592e+07	8.6937e+07
ZMO0983	1.751e+07	2.6565e+07	2.4356e+07	7.23811e+06	1.6258e+07	1.5449e+07	1.2895e+07	2.4184e+07	1.7714e+07	2.049e+07	2.065e+07	1.6375e+07	2.5549e+07	2.8051e+07	2.8333e+07	1.7939e+07	2.2554e+07	4.4751e+07	2.2993e+07	1.5462e+07	1.8513e+07	2.4323e+07	1.7191e+07	2.7259e+07
ZMO0984	1.2705e+08	1.1406e+08	1.1733e+08	9.7661e+07	9.5038e+07	9.459e+07	7.9519e+07	7.5926e+07	8.1861e+07	4.9227e+07	4.2584e+07	3.4856e+07	1.1322e+08	1.4802e+08	1.5675e+08	1.2593e+08	1.2911e+08	9.81621e+07	9.93141e+07	9.282e+07	7.8271e+07	4.1143e+07	4.6752e+07	2.6496e+07
ZMO0985	1.8533e+09	1.8341e+09	1.7318e+09	1.7081e+09	1.8894e+09	1.714e+09	1.6988e+09	1.6159e+09	1.7648e+09	1.4282e+09	1.415e+09	1.6578e+09	1.9215e+09	1.9794e+09	2.0011e+09	1.8611e+09	2.0132e+09	2.202e+09	1.8166e+09	1.9454e+09	2.0219e+09	1.2637e+09	1.6607e+09	1.4884e+09
[truncated: 845 more rows]
